## Convergent adaptation of true crabs (Decapoda: Brachyura) to a gradient of terrestrial environments

Joanna M. Wolfe<sup>1\*</sup>, Lauren Ballou<sup>2</sup>, Javier Luque<sup>1,2</sup>, Victoria M. Watson-Zink<sup>3</sup>, Shane T. Ah Yong<sup>4,5</sup>, Joëlle Barido-Sottani<sup>6</sup>, Tin-Yam Chan<sup>7</sup>, Ka Hou Chu<sup>8,9</sup>, Keith A. Crandall<sup>10,11</sup>, Savel R. Daniels<sup>12</sup>, Darryl L. Felder<sup>11,13</sup>, Harrison Mancke<sup>2</sup>, Joel W. Martin<sup>14</sup>, Peter K.L. Ng<sup>15</sup>, Javier Ortega-Hernández<sup>1</sup>, Emma Palacios Theil<sup>16</sup>, N. Dean Pentcheff<sup>14</sup>, Rafael Robles<sup>13,17</sup>, Brent P. Thoma<sup>18</sup>, Ling Ming Tsang<sup>8</sup>, Regina Wetzer<sup>14</sup>, Amanda M. Windsor<sup>11,19</sup>, Heather D. Bracken-Grissom<sup>2,11\*</sup>

<sup>1</sup> Museum of Comparative Zoology and Department of Organismic & Evolutionary Biology, Harvard University, 26 Oxford St, Cambridge, MA 02138, USA

<sup>2</sup> Institute of Environment and Department of Biological Sciences, Florida International University, Biscayne Bay Campus, North Miami, FL 33181, USA

<sup>3</sup> Department of Biology, Stanford University, Stanford, CA 94305, USA

<sup>4</sup> Australian Museum, 1 William St, Sydney, NSW 2010, Australia

<sup>5</sup> School of Biological, Earth & Environmental Sciences, University of New South Wales, Kensington, NSW 2052, Australia

<sup>6</sup> Institut de Biologie de l'École Normale Supérieure (IBENS), ENS, CNRS, INSERM, Université PSL (Paris Sciences & Lettres), Paris, France

<sup>7</sup> Institute of Marine Biology and Center of Excellence for the Oceans, National Taiwan Ocean University, Keelung 202301, Taiwan, ROC

<sup>8</sup> Simon F. S. Li Marine Science Laboratory, School of Life Sciences, The Chinese University of Hong Kong, Hong Kong SAR, China

<sup>9</sup> Southern Marine Science and Engineering Guangdong Laboratory (Guangzhou), Guangzhou, China

<sup>10</sup> Computational Biology Institute, Department of Biostatistics and Bioinformatics, Milken Institute School of Public Health, George Washington University, Washington, DC 20052, USA

<sup>11</sup> Department of Invertebrate Zoology, US National Museum of Natural History, Smithsonian Institution, Washington, DC 20560, USA

<sup>12</sup> Department of Botany and Zoology, University of Stellenbosch, Private Bag X1, Matieland, 7602, South Africa

<sup>13</sup> Department of Biology and Laboratory for Crustacean Research, University of Louisiana at Lafayette, Lafayette, LA 70504, USA

<sup>14</sup> Research and Collections, Natural History Museum of Los Angeles County, 900 Exposition Boulevard, Los Angeles, California 90007, USA

<sup>15</sup> Lee Kong Chian Natural History Museum, Faculty of Science, National University of Singapore, 2 Conservatory Drive, 117377 Singapore, Singapore

<sup>16</sup> Department of Invertebrate Zoology and Hydrobiology, University of Łódź, ul. Banacha 12/16, 90-237 Łódź, Poland

<sup>17</sup> Facultad de Ciencias Químico Biológicas, Universidad Autónoma de Campeche, San Francisco de Campeche, Campeche, México

<sup>18</sup> Department of Biology, Jackson State University, P.O. Box 18540, Jackson, MS 39217, USA

<sup>19</sup> United States Food and Drug Administration, Office of Regulatory Science, 5001 Campus Dr. College Park, MD 20740, USA

\* Corresponding authors. Email: [jowolfe@g.harvard.edu](mailto:jowolfe@g.harvard.edu), [hbracken@fiu.edu](mailto:hbracken@fiu.edu)

**Abstract:** For much of terrestrial biodiversity, the evolutionary pathways of adaptation from marine ancestors are poorly understood, and have usually been viewed as a binary trait. True crabs, the decapod crustacean infraorder Brachyura, comprise over 7,600 species representing a striking diversity of morphology and ecology, including repeated adaptation to non-marine habitats. Here, we reconstruct the evolutionary history of Brachyura using new and published sequences of 10 genes for 344 species spanning 88 of 104 families. Using 36 newly vetted fossil calibrations, we infer that brachyurans most likely diverged in the Triassic, with family-level splits in the late Cretaceous and early Paleogene. By contrast, the root age is underestimated with automated sampling of 328 fossil occurrences explicitly incorporated into the tree prior, suggesting such models are a poor fit under heterogeneous fossil preservation. We apply recently defined trait-by-environment associations to classify a gradient of transitions from marine to terrestrial lifestyles. We estimate that crabs left the marine environment at least five and up to 15 times convergently, and returned to the sea from non-marine environments three or four times. Although the most highly terrestrial- and many freshwater-adapted crabs are concentrated in Thoracotremata, Bayesian threshold models of ancestral state reconstruction fail to identify shifts to higher terrestrial grades due to the degree of underlying change required. Lineages throughout our tree inhabit intertidal and marginal marine environments, corroborating the inference that the early stages of terrestrial adaptation have a lower threshold to evolve. Our framework and newly compiled fossil and natural history datasets will enable future comparisons of non-marine adaptation at the morphological and molecular level. Crabs provide an important window into the early processes of adaptation to novel environments, and different degrees of evolutionary constraint that might help predict these pathways.

**Keywords:** Brachyura, crustaceans, convergent evolution, terrestrialization, molecular phylogeny, divergence times, fossil calibration, threshold model

## Introduction

Over 80% of estimated species comprising extant multicellular life inhabit terrestrial and freshwater (“non-marine”) settings (Román-Palacios et al. 2022). Microbial life began to populate terrestrial habitats in the Precambrian, with eukaryotes potentially originating in non-marine settings around 1.6 Ga (Jamy et al. 2022), although major multicellular groups such as animals and plants were ancestrally marine. Their terrestrialization followed in the early Paleozoic (approximately 538–444 Ma), led by arthropods entering coastal and marginal marine settings (e.g., estuaries, lagoons), and plants that transformed the land and its sediments (Buatois et al. 2022). Although molecular divergence time estimates infer early Paleozoic ages for terrestrial arthropod crown groups (e.g., Bernot et al. 2022; Benavides et al. 2023), recognizable body fossils of millipedes, arachnids, and hexapods have recorded their presence on land by the onset of the Silurian–Devonian (443–359 Ma). Subsequently, these groups radiated to become prominent components of terrestrial biodiversity. Fossil evidence suggests potential transitions through marginal marine settings (Edgecombe et al. 2020; Lamsdell et al. 2020), but transitions for many modern groups lack such clues (e.g., the remipede sister group is now predominantly restricted to marine layers within anchialine caves), hinting at complex ecological pathways. Here, we examine the evolutionary history of a clade, the true crabs (Decapoda: Brachyura), that might provide insights into the early phases of adaptation from marine to non-marine environments, now obscured by extinction.

As with life in general, crabs have an unequivocally marine ancestor. The largest group of Brachyura, called Eubrachyura, which contains all non-marine members, could be as old as the mid-Jurassic (183–161 Ma) based on phylogenomic divergence time estimates (Wolfe et al. 2019). During the “Cretaceous Crab Revolution” (145–66 Ma), many now-extinct lineages appeared briefly, accompanied by the divergence of many extant superfamilies (Wolfe et al. 2019; Luque et al. 2019b; Wolfe et al. 2021). Although the direct record of fossil crabs from non-marine sediments is depauperate, one well-preserved example of a completely extinct non-marine eubrachyuran lineage is known from around 100 Ma (Luque et al. 2021), and chelipeds of uncertain affinity from non-marine sediments around 74 Ma (Robin et al. 2019). Together, these fossils suggest that crabs have been entering non-marine habitats for the majority of their evolutionary history.

Complementary to direct fossil evidence, dated phylogenies and character mapping have recently been applied (Davis et al. 2022; Tsang et al. 2022). Eubrachyura has been previously divided into two presumed clades based on the position of the male gonopores: “Heterotremata” and Thoracotremata. In a 10-gene molecular study focused on the relationships of the clade Thoracotremata, the common ancestor of this clade was found to be “semi-terrestrial” (in Tsang et al. [2022], this referred to intertidal habitats) and Cretaceous in origin, with at least four transitions to terrestrial and two or three transitions to freshwater lifestyles, all within the Cenozoic (Tsang et al. 2022). In one instance, sesarmid crabs (*Geosesarma*, vampire crabs) transitioned from terrestrial to freshwater habitats. At least six returns to subtidal marine habitats were estimated (Tsang et al. 2022). A separate supertree-based study across Decapoda inferred three transitions to terrestriality and three to freshwater within all of Brachyura (Davis et al. 2022). One reversal from terrestrial to marine habitats was estimated. The oldest event, encompassing the freshwater heterotreme groups Potamoidea, Gecarcinoidea, and

Pseudothelphusoidea, occurred in the upper Cretaceous, with others in the Cenozoic. Additionally, Davis et al. (2022) inferred higher rates of speciation in non-marine crabs, but habitat shifts were not found to be a significant causal factor driving crab diversity.

The aforementioned phylogenetic studies, however, treated marine, terrestrial, and freshwater lifestyles as largely discrete ecologies for crabs. Indeed, previous studies have described a gradient of terrestrial change based on independence from standing water (e.g., Bliss 1968; Powers and Bliss 1983; Hartnoll 1988). Others (e.g., Yeo et al. 2008; Cumberlidge and Ng 2009; Cumberlidge et al. 2009) focused on the seven exclusively (“primary”) freshwater crab families and their vicariant biogeography leading to high endemism and risks of extinction, but rarely drew comparisons with terrestrial crabs. Recently, Watson-Zink (2021) unified the conceptualization of the terrestrial and freshwater crab lifestyles as a series of ecological, morphological, and physiological traits describing grades of terrestriality. Crabs can transition from fully marine lifestyles (**Figure 1A-E**) along either of two transition pathways: through marine-associated environments (e.g., the “direct” pathway of Tsang et al. [2022], via intertidal, mangroves, beaches: **Figure 1F-J**) or through freshwater environments (e.g., the “indirect” pathway via estuaries, rivers: **Figure 1K-O**). Each grade of terrestriality is loosely associated with habitats: lower intertidal and estuaries (grade 1), upper intertidal and freshwater (grade 2), beaches and riverbanks (grade 3), and coastal forests and jungles, including tree climbing (grades 4-5; Watson-Zink 2021). Less terrestrial crabs (grades 1 and 2) in either pathway can tolerate fluctuating environments, with osmoregulatory ability likely playing a major role in these lifestyles (Watson-Zink 2021). Crabs of higher terrestriality (grades 3-5) develop further morphological and developmental adaptations, such as branchiostegal lungs and water-wicking setae to prevent desiccation, and increasingly abbreviated larval development and parental care (Watson-Zink 2021). It is evident that multiple brachyuran families have repeatedly evolved members of both transition pathways and various grades, but their distribution across crab phylogeny (within and beyond Thoracotremata) over time remains unclear.

To resolve the convergent evolution and timing of terrestriality, we present the most robust molecular taxon sampling to date for Brachyura, representing 344 species and 88 of 104 families. As our data represent only Sanger sequences of 10 loci, revision of brachyuran systematics is beyond the scope of the current study (Timm and Bracken-Grissom 2015), and efforts are currently underway to clarify deep relationships using phylogenomics. Furthermore, to partially ameliorate false confidence in the topology, we provide additional metrics describing the degree of nodal uncertainty. Using these data, we contrast divergence times inferred using 36 newly vetted calibrations with traditional node dating, and 328 calibrations sampled from the Paleobiology Database under the fossilized birth-death (FBD) and skyline models of tree evolution, one of only a few empirical comparisons of its type. Finally, we summarize the natural history traits of each sampled crab to assign each along a gradient of transitions from marine to terrestrial lifestyles (Watson-Zink 2021), and use Bayesian threshold models of ancestral state reconstruction to estimate convergent events.

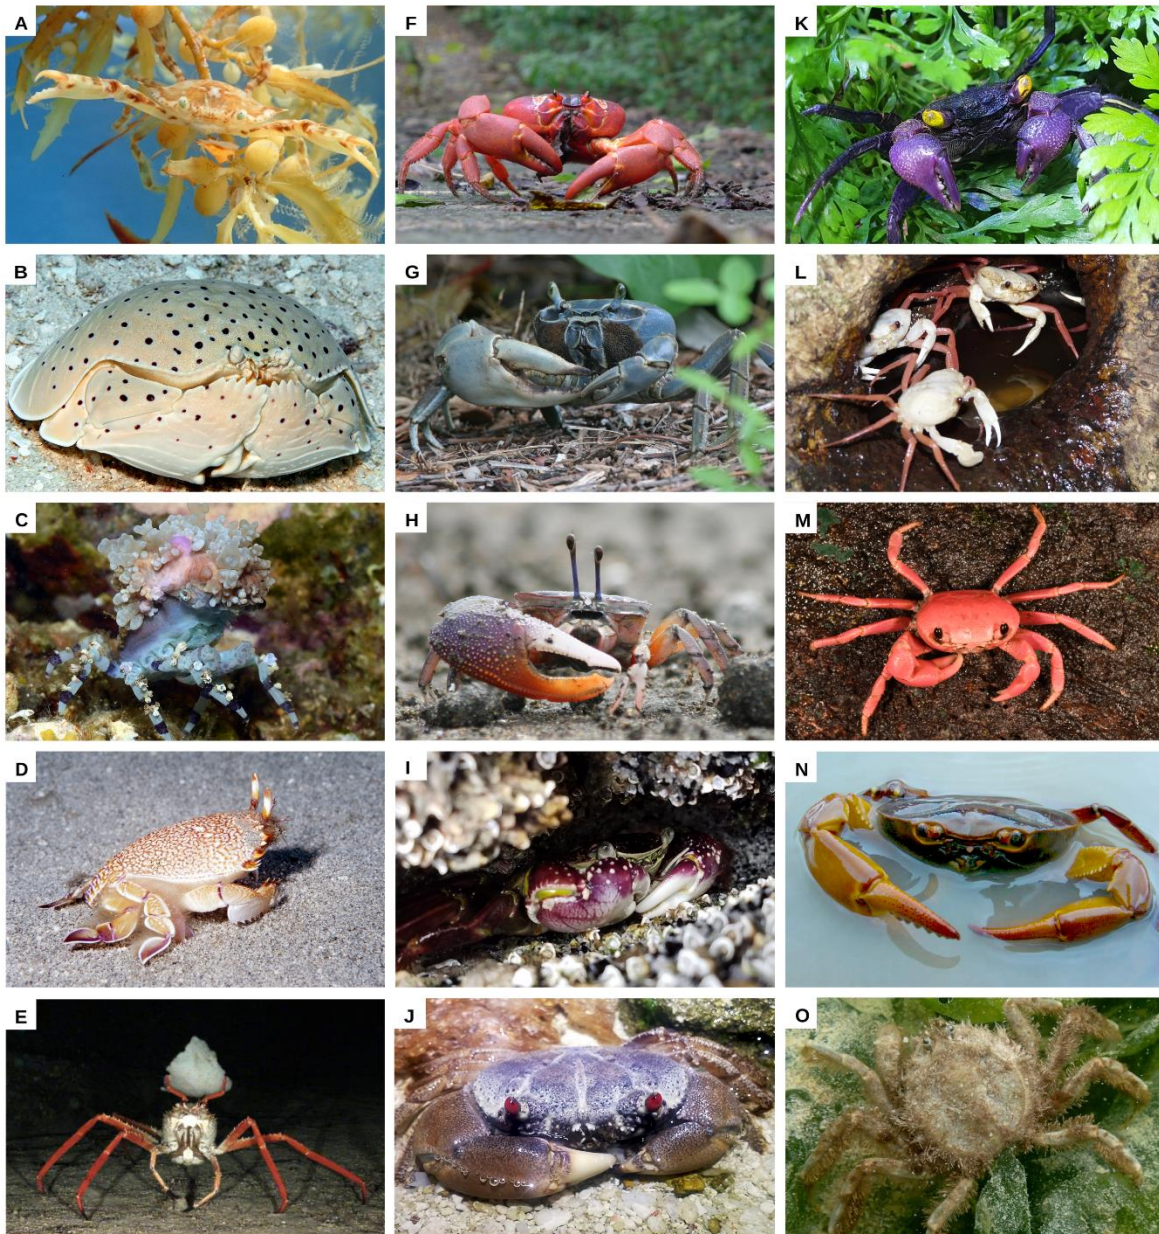

**Figure 1.** Representative brachyurans displaying different lifestyles and grades of terrestriality. (A-E) Fully marine lifestyle, grade 0; (F-J) direct marine transition pathway, grades 1-5 bottom to top; (K-O) indirect freshwater transition pathway, grades 1-5 bottom to top. (A) Portunidae: *Portunus sayi* (Bermuda); (B) Calappidae: *Calappa calappa* (Kwajalein Atoll, Marshall Islands); (C) Epialtidae: *Cyclocoeloma tuberculatum* (Anilao, Philippines); (D) Raninidae: *Ranina ranina* (Oahu, Hawaii, USA); (E) Homolidae: *Paromola cuvieri* (Gorringe Ridge, Portugal); (F) Gecarcinidae: *Gecarcoidea natalis* (Christmas Island, Australia); (G) Gecarcinidae: *Cardisoma guanhumi* (Fort Lauderdale, Florida, USA); (H) Ocypodidae: *Uca heteropleura* (Pacific coast, Panama); (I) Grapsidae: *Leptograpsus variegatus* (Tasmania, Australia); (J) Eriphiidae: *Eriphia sebana* (Heron Island, Queensland, Australia); (K) Sesarimidae: *Geosesarma dennerle* (aquarium specimen); (L) Deckeniidae: *Madagapotamon humberti* (Montagne de Français Reserve, Madagascar); (M) Gecarcinucidae: *Ghatiana botti* (Sindhudurg, India); (N) Pseudothelphusidae indet. (Santander, Colombia); (O) Hymenosomatidae: *Hymenosoma orbiculare* (Langebaan Lagoon, South Africa). Photo credits: (A) Jessica Riederer; (B, C) Jeanette and Scott Johnson; (D) John Hoover; (E) © OCEANA; (F) John Tann, license CC-BY; (G) Tom Friedel, license CC-BY 3.0; (H) Kecia Kerr and Javier Luque; (I) Joanna Wolfe; (J,N) Javier Luque; (K) Henry Wong; (L) Sara Ruane; (M) Tejas Thackeray; (O) Charles Griffiths.

## Materials and Methods

### *Taxon sampling*

This dataset represents over 15 years of sampling crabs in the field or from museum collections (**Table S1**). The final dataset includes 88 families, 267 genera, 336 species and 344 individuals within the infraorder Brachyura, 42% representing new sequence data, with the remainder obtained directly from GenBank (**Table S1**). All taxonomy was checked against expert compilations (Ng et al. 2008; Poore and Ah Yong 2023; WoRMS 2022).

### *Gene selection*

A total of 10 genes were selected based on previous phylogenetic research of decapods (Spears and Abele 1998; Schubart et al. 2000; Tsang et al. 2008; Bracken-Grissom et al. 2013; Tsang et al. 2014). These included two mitochondrial ribosomal RNA (rRNA) coding genes, 12S (small ribosomal subunit) and 16S (large ribosomal subunit) as well as two nuclear rRNA genes, 18S (small ribosomal subunit) and 28S (large ribosomal subunit). The six nuclear protein-coding genes NaK (sodium-potassium ATPase  $\alpha$ -subunit), PEPCK (phosphoenolpyruvate carboxykinase), GADPH (glyceraldehyde 3-phosphate dehydrogenase), H3 (histone 3), enolase (phosphopyruvate hydratase), and AK (arginine kinase) were also included. A minimum of two genes were required for each taxon included in the analysis.

### *DNA extraction, PCR, and sequencing*

Genomic DNA was extracted from the gills, abdomen, pereopod, or pleopod, using the Qiagen DNeasy® Blood and Tissue Kit (Cat. No. 69582), QIAamp DNA Mini Kit (Cat. No. 51304) or QIAamp DNA Micro Kit (Cat. No. 56304). Gene regions were amplified with polymerase chain reaction (PCR) using one or more sets of primers. Annealing temperatures and primer sequences are as follows: 12S rRNA (325 bp, Buhay et al. 2007), 16S rRNA (339 bp, Simon et al. 1994; Crandall and Fitzpatrick 1996; Schubart et al. 2002), 18S rRNA (1798 bp, Medlin et al. 1988; Whiting et al. 1997; Whiting 2002; Bracken et al. 2009), 28S rRNA (1892 bp, Whiting et al. 1997; Whiting 2002; Palero et al. 2008), histone 3 (H3) (336 bp, Colgan et al. 1998), NaK (606 bp, Tsang et al. 2008), PEPCK (582 bp, Tsang et al. 2008), GADPH (609 bp, Tsang et al. 2011), enolase (399 bp, Tsang et al. 2011), and AK (630 bp, Tsang et al. 2011).

PCR amplifications were performed in 25–50  $\mu$ l volumes containing 1 U of Taq polymerase (HotMaster, AccuPrime or REDTaq), PCR Buffer, 2.5 mM of deoxyribonucleotide triphosphate mix (dNTPs), 0.5  $\mu$ M forward and reverse primer, and 30–100 ng extracted DNA. The thermal profile used an initial denaturation for 1 min at 94°C followed by 30–40 cycles of 30 sec-1 min at 94°C, 45 sec-1 min at 46–58°C (depending on gene region), 1 min at 72°C and a final extension of 7 min at 72°C. PCR products were purified using filters (PrepEase™ PCR Purification 96-well Plate Kit, USB Corporation) and sequenced with ABI BigDye® terminator mix (Applied Biosystems, Foster City, CA, USA). Cycle Sequencing reactions were performed in an Applied Biosystems 9800 Fast Thermal Cycler (Applied Biosystems, Foster City, CA, USA), and sequencing products were run (forward and reverse) on an ABI 3730xl DNA Analyzer 96-capillary automated sequencer.

### *Phylogenetic analysis*

Sequences (n = 2251) were assembled and trimmed within Geneious Prime (Kearse et al. 2012). All protein coding genes (AK, enolase, GADPH, H3, NaK, PEPCK) were checked for pseudogenes following Song et al. (2008). Ribosomal RNA genes (12S, 16S, 18S, 28S), were individually aligned using the MAFFT via local iterative refinement algorithms in Geneious v.2021.0.1 (Kearse et al. 2012; Katoh and Standley 2013). Protein-coding genes were individually aligned in Geneious using the MAFFT global iterative refinement algorithm. To remove regions of questionable homology, rRNA alignments were masked in GBLOCKS v.0.91b (Castresana 2000) under “less stringent” parameters.

Alignments were concatenated in Geneious Prime. Best-fitting partitions were selected by an edge-linked proportional model (Chernomor et al. 2016) and substitution models with ModelFinder (Kalyaanamoorthy et al. 2017) in IQ-TREE v.2.1.2 (Minh et al. 2020b). The best-fitting scheme was used to estimate the concatenated maximum likelihood (ML) phylogeny, also in IQ-TREE, using 10 independent runs with perturbation strength 0.2 and stopping at 500 iterations, selecting the best topology by the highest log likelihood (Zhou et al. 2018). Ultrafast (UF) bootstrap values were calculated from 1000 replicates using the -bnni flag (Hoang et al. 2018). Gene and site concordance factors (gCF and sCF, respectively) were calculated in IQ-TREE v.2.2.2 (Minh et al. 2020a; Mo et al. 2022), simultaneously generating individual gene trees using ML. We further explored the resolution of individual loci evolving at different rates by using a metric for per-site phylogenetic informativeness (Townsend 2007) estimated by the online PhyDesign program (<http://phydesign.townsend.yale.edu/>; López-Giráldez and Townsend 2011) using the DNARates substitution model.

We conducted a Bayesian inference (BI) analysis of the concatenated loci using MrBayes v.3.2.7 (Ronquist et al. 2012). Two runs and four chains were run for 35 million generations with 25% burnin. Convergence was assessed by reaching effective sample size >200 for every parameter, and by evaluating posterior distributions in Tracer v.1.7.1 (Rambaut et al. 2018).

### *Fossil calibration and divergence time inference*

We compared two strategies for fossil calibration: (1) 36 newly vetted node calibrations, and (2) 328 fossil occurrences from the Paleobiology Database (PBDB; <http://paleobiodb.org/>). For node calibration, all calibrations followed best practices regarding specimen data, morphological diagnosis, and stratigraphy (Parham et al. 2012; Wolfe et al. 2016; details in **Text S1, Table S2**), and were assigned to a crown group node at the family level or higher. All internal calibration age distributions were uniform. We applied a root prior with a fossil-informed lognormal distribution (mean = 282 Ma, standard deviation = 0.25, offset = 25; based on the same node in Wolfe et al. [2019]). This node dating strategy used a birth-death tree prior.

We downloaded fossil occurrences from the PBDB on March 23, 2022, for Brachyura at family-level taxonomic resolution, excluding uncertain genera and species, with accepted names only, from Jurassic to Pleistocene. Although issues are known with the entry of decapod fossil taxonomy in the PBDB, higher levels are somewhat adequate (M. Uhen and M. Clapham, pers. comm.). We spot checked occurrences for accuracy, updated PBDB taxonomy where we found errors, and manually removed from our downloads 30 families that could not be placed in our tree (extant families without molecular data, or extinct families with no known phylogenetic

context). We randomly subsampled 10% of the 3,276 remaining occurrences, resulting in 328 occurrences. All fossil occurrences were assigned age ranges from the PBDB, each with a uniform distribution (Barido-Sottani et al. 2019, 2020). To incorporate these fossil samples as part of the inferred evolutionary process, we used the unresolved time-homogeneous fossilized birth-death (FBD) tree prior (Stadler 2010; Heath et al. 2014; O’Reilly and Donoghue 2020), conditioned on the same root prior as above. The diversification rate was assigned a uniform prior (0, infinity) to reflect the unknown proportion of extinct relative to extant species, and an initial rate of 0.01. The turnover rate and sampling proportion were both assigned uniform priors with distribution (0, 1). For rho, the proportion of living species sampled, the value was fixed at 0.04 based on 7,636 valid brachyuran species in WoRMS (WoRMS 2021).

To reflect the complete absence of brachyuran fossils from earlier than the Jurassic, which represents a known ghost lineage when compared to the diversity and abundance of anomuran fossils, thus earlier diversification of the sister group (Hegna et al. 2020; Wolfe et al. 2021), we also analyzed the fossil occurrence calibration set using a birth-death skyline tree prior with sequential sampling (BDSS; Stadler et al. 2013; Culshaw et al. 2019). Fossil sampling proportion was modeled as time-heterogeneous with time slices before and after the oldest fossil sample (initial values of 0 and 0.1, respectively), and a uniform prior distribution (0, 1). This was done using the TreeSlicer function from the skylinetools package (<https://github.com/laduplessis/skylinetools>). While we used the same root prior, the origin time was estimated with a uniform prior (182, 372) and an initial value of 325 Ma (**Text S1**; Wolfe et al. 2019). The reproductive number  $R_0$  (i.e., birth rate/total death rate) had a dimension of 5; this parameter and the total death rate were both assigned lognormal prior distributions.

All divergence time analyses were conducted in BEAST2 v.2.6.4 (Bouckaert et al. 2019) using a fixed starting tree derived from our ML concatenated results. When using fossil occurrences (FBD and BDSS analyses only), these were added to the starting tree as “rogues” (able to move within pre-assigned family level constraints following Barido-Sottani et al. [2022], as most decapod fossils are fragmentary and cannot be confidently assigned). All analyses linked the substitution models selected by ModelFinder, and the clock models of those partitions (4 categories total). For each calibration strategy and tree prior, we compared two clock models: relaxed lognormal (Drummond et al. 2006) and random local (Drummond and Suchard 2010), using lognormal priors on the mean branch rates (lower and upper values of 0.001 and 1, respectively). Analyses used four to six independent runs for at least 450 million generations with 25% burnin, visualized as a maximum clade credibility tree. Convergence was assessed as above. Having explored a total of six divergence time analyses, we visualized the results from different parameter sets using *chronospace* scripts (Mongiardino Koch et al. 2022; *development version, will provide scripts for final paper*).

#### *Ancestral state reconstruction*

To code character states representing a gradient of terrestriality, we used a modified version of the trait-by-environment associations defined by Watson-Zink (2021). Distinct transition pathways were defined for marine and freshwater routes. For each pathway, we used five of the six grades of increasing terrestriality; the highest level does not appear in our data (Watson-Zink 2021). We added a grade 0, to indicate that the ancestral state for all crabs is fully marine (**Figure 1A-E**). Using this framework, we coded discrete grades of terrestriality



following two schemes. The first scheme coded the taxa that were sequenced in our molecular phylogeny and required detailed justification from natural history literature (**Table S3, Text S2**). Justifications accounted for available data on adult habitat, osmoregulatory status, larval developmental strategy, primary respiratory structure, water-wicking setae, burrow type, and diurnal activity period (Watson-Zink 2021). As our phylogeny sampled 4% of brachyuran species as tips, we also constructed a scheme to estimate grades for unsampled species for which the phylogenetic positions are unknown. For this scheme, we downloaded all taxonomic data, including non-marine taxa, from WoRMS as of June 8, 2021. For families sampled in our tree, we used the WoRMS data to estimate the number of species that fall into each grade (without detailed literature survey per species) and accordingly assigned prior distributions to each tip on the molecular phylogeny (**Table S4**).

First, we used stochastic character mapping (Bollback 2006; Revell 2012) to infer ancestral states at each node on the chronogram with vetted calibrations. For this we used a single dataset, where the natural history codings were simplified to marine, and marine/direct and freshwater/indirect transition paths (i.e., three unordered states of a single character), with the posterior distribution simulated 500 times. Next, we used Bayesian threshold models (Revell 2014) to account for gradients of change. A character coded with discrete ordered states (i.e., our grades) was assumed to evolve according to an unobserved continuous trait called “liability” (here representing the coded natural history traits combined with additional unobserved factors). Following Sallan et al. (2018), we assume thresholds represent the amount of change in terrestriality traits that allows a habitat shift. As there are two independent transition pathways with their own gradients, these were analyzed separately for each direction of change (and on subclades for transitions between direct and indirect pathways). Threshold models for ancestral state reconstruction were implemented as the *ancThresh* function in *phytools* (Revell 2012). Each *ancThresh* model (Brownian Motion: BM, Ornstein-Uhlenbeck: OU, and Pagel’s Lambda) was run for 50 million generations (5 million for subclades) with 20% burnin (Revell 2014; Sallan et al. 2018).

## Results

### *Phylogenetic relationships*

The concatenated alignment length comprised 7,516 bp in total from two mitochondrial rRNA, two nuclear rRNA, and six nuclear protein-coding genes (gene trees visualized in **Figures S1-10**). Results using ML and BI were similar, with some deeper nodes (higher than family level) maintaining low to moderate support (UF bootstrap = 50-94; **Figures 2, S11**) with ML and generally stronger support (most posterior probabilities  $\geq 0.98$ ; **Figure S12**) with BI. For each node of the ML tree, gCF reflects the percentage of loci containing all the descendant taxa, and sCF the percentage of sites supporting the node (Minh et al. 2020b). Both concordance factors illustrate a spectrum of support across nodes that are fully supported with UF bootstraps (**Figure S13**). The average gCF was 32.73 (**Figures S11, S13**), indicating one third of loci support the average node. However, nearly half of sites support the average node (average sCF = 45.64), demonstrating the benefit of concatenation for small numbers of loci.

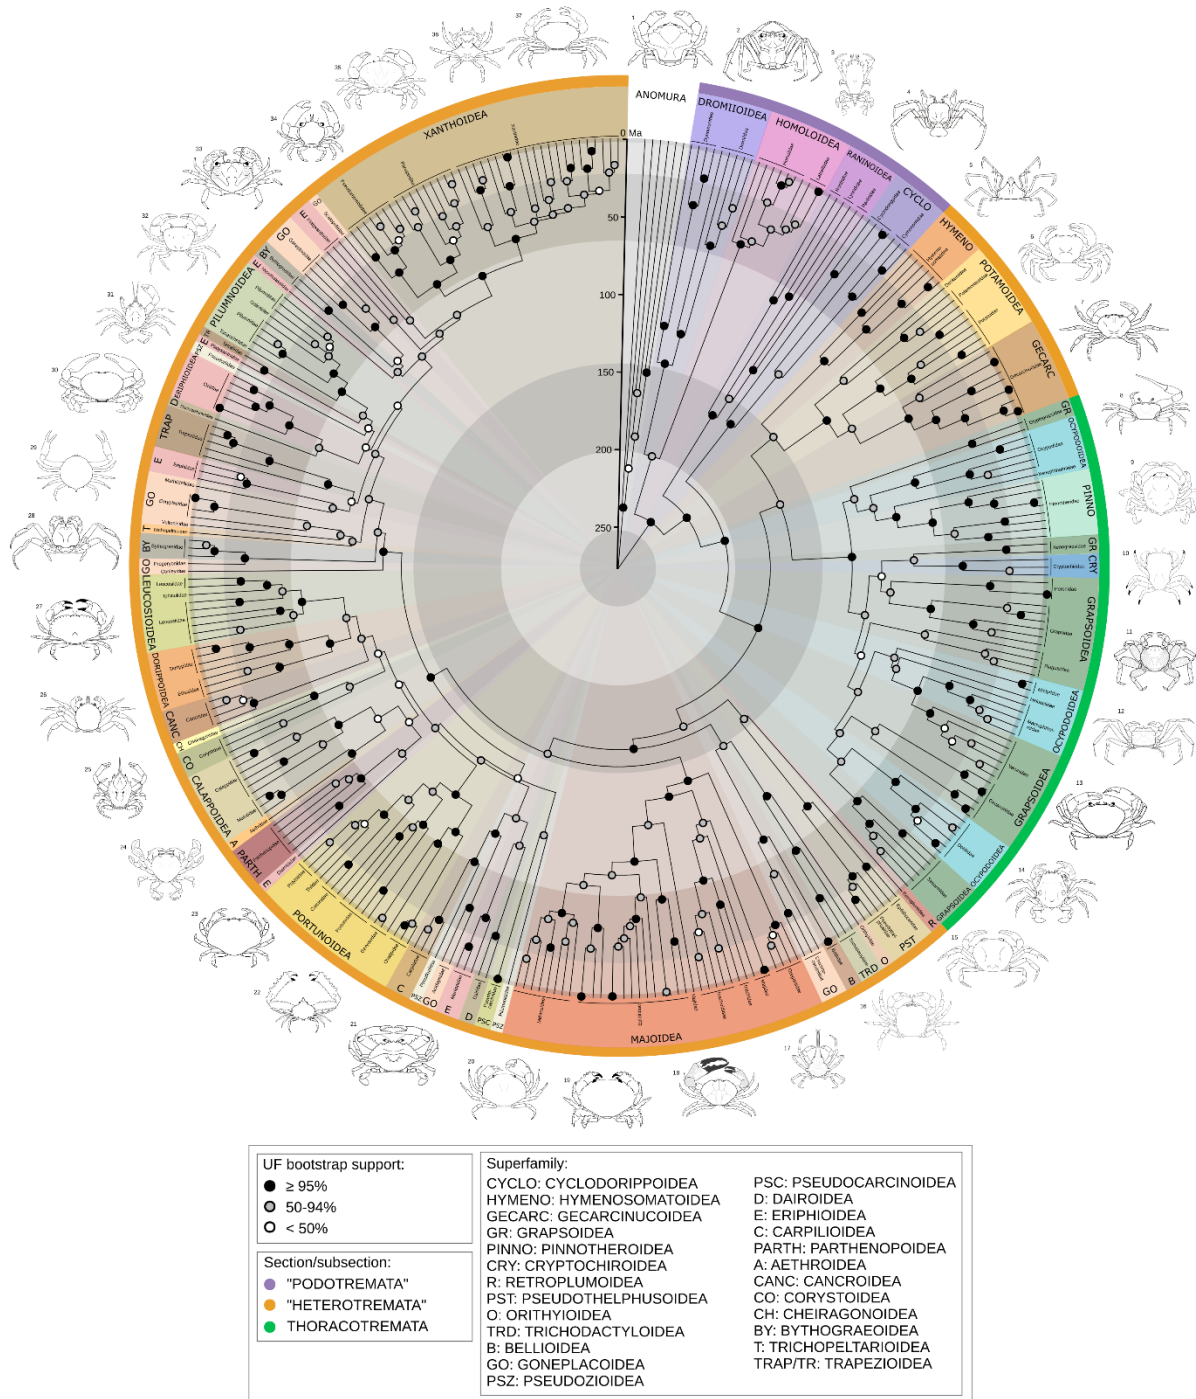

**Figure 2.** Summary of phylogeny and divergence time estimates for Brachyura. Posterior ages were estimated in BEAST2 using a fixed topology resulting from the concatenated ML analysis in IQ-TREE, 36 vetted node calibrations, a birth-death tree prior, and relaxed lognormal clock model. Shaded circles at nodes represent ultrafast bootstraps. Pie slices are colored by superfamily, with the outermost ring colored by taxonomic section. Line drawings, one representative per superfamily (numbers corresponding to taxa in Table S5), by Javier Luque and Harrison Mancke.

Revision of brachyuran systematics at nodes above the family level would best be undertaken with phylogenomic scale data (Wolfe et al. 2019 and phylogenetic informativeness

profiles, **Figure S14**), therefore we only briefly summarize the topology results here and in **Figure 2**. Podotremes are paraphyletic with respect to Eubrachyura, forming the following successive clades: Dromioidea + Homoloidea (this pairing has low support from ML, but strong from BI), Raninoidea, and Cyclodorippoidea (latter two clades with full support). Within Eubrachyura, subsection Heterotremata is paraphyletic with respect to monophyletic Thoracotremata. The so-called primary freshwater crabs are polyphyletic. The African and Eurasian groups (Potamoidea and Gecarcinucoidea) form a clade (UF bootstrap = 95, posterior probability = 0.89), and are themselves the sister clade of the Gondwanan Hymenosomatoidea (UF bootstrap = 92, posterior probability = 1). Together, this group comprises the sister group of Thoracotremata, with moderate support from ML (albeit with low concordance factors) and full support from BI. Within Thoracotremata, some higher-level relationships are weakly supported by ML (UF bootstraps < 75%, low gCF), but most nodes are similar to BI (where they have moderate to high support). Both Grapsoidea and Ocypodoidea are polyphyletic.

Meanwhile, the Neotropical freshwater groups branch off within clades including the deepest (Pseudothelphusoidea) and second deepest (Trichodactyloidea) divergences within the main heterotreme group, although these nodes are not strongly supported by traditional metrics in either analysis (concordance factors for both are > 60, some of the highest in our data). The remaining heterotremes are subdivided into Majoidea, and two large supported clades containing 24 and 23 families, respectively. Within these latter clades, the superfamilies Eriphioidea and Goneplacoidea are strongly polyphyletic. Some deep splits within both clades are poorly supported (some nodes UF bootstrap < 50, concordance factors = 0, posterior probability < 0.8).

We find that 76 of all sequenced families are monophyletic, with the same exceptions in both ML and BI trees. Paraphyletic families are: the podotremes Homolidae (containing Latreillidae), Raninidae (containing Lyreididae), and Cyclodorippidae (containing Cymonomidae), and the heterotremes Epiplatidae (containing Mithracidae), Carcinidae (containing Thiidae and Polybiidae), Corystidae (containing Cheiragonidae), Leucosiidae (containing Iphiculidae), and Pilumnidae (containing Galenidae). Polyphyletic families, all within heterotremes, are: Majidae, Bythograeidae, Platyxanthidae, and Pseudoziidae.

### *Divergence times*

Results of divergence time inference vary depending on parameters used, with results of the vetted calibration strategy distinct on the major axis (**Figure 3A**), and the FBD and BDSS results being similar to one another. Although none of the random local clock analyses converged after extensive runtime, we plotted samples from their individual chains with burnin of 50% to reduce the effect of poor mixing; when included, the choice of clock model also differs significantly (**Figure 3B**), but mostly in the same direction at the same nodes as the calibration strategy (**Figure 3C**). In case the unconverged analyses were skewing the results, we plotted results from relaxed lognormal clocks alone (**Figure S15**), finding the groupings by calibration strategy were upheld.

Similar to Wolfe et al. (2019), using the vetted node calibrations, the divergence of Meiura (i.e., the root node) is inferred in the Permian (mean age at 277 Ma), while crown group Brachyura diverged in the Triassic (mean age 241 Ma), and crown group Eubrachyura in the

Jurassic (mean age 179 Ma). Superfamily level divergences were inferred in the Jurassic for podotremes, and almost entirely within the Cretaceous within Eubrachyura (**Figure S16**).

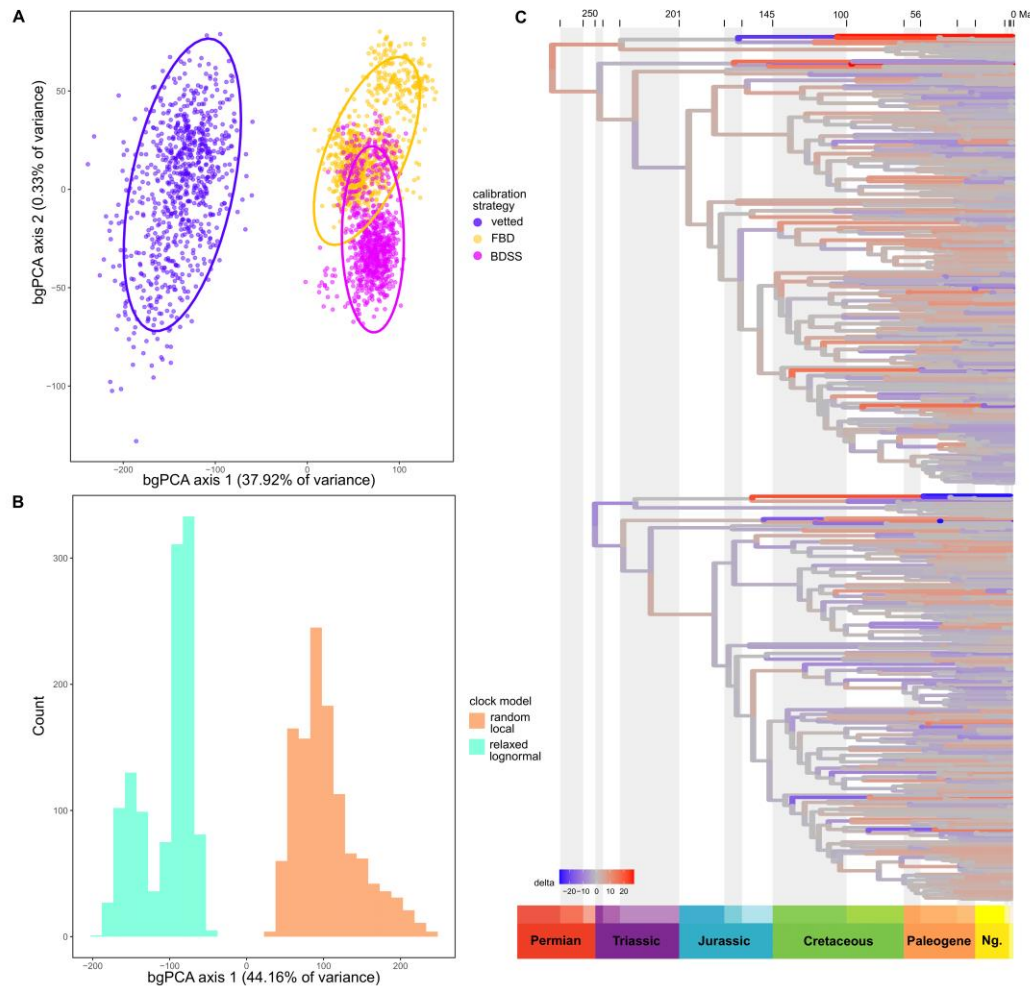

**Figure 3.** Sensitivity of divergence time estimates to inference strategy plotted with *chronospace*, with outgroup taxa removed from these analyses. (A) Between--group principal component analysis (bgPCA) separating chronograms by calibration strategy and (B) by clock model (note: analyses with the random local clock model did not converge, so individual chains are sampled here with 50% burnin). (C) Change in branch lengths along the major bgPCA axis, discriminating based on calibration strategy. Negative extreme above, positive extreme below.

Divergence estimates using fossil occurrence sampling were both considerably younger than with the vetted calibrations, with the root estimate in the Jurassic in both cases (mean ages at 180 Ma for FBD, and 191 Ma for BDSS; **Figures S17-18**). The PBDB calibrated analyses are relatively immune to the root prior (**Figure S19A**). Most other nodes were similarly compressed, with crown group Brachyura in the Jurassic and superfamily level divergences pushed to the Upper Cretaceous and Paleogene, although the posterior did not follow the marginal prior at some nodes with BDSS (**Figure S19B**). These analyses often inferred the placement of “rogue” fossils within the stem groups of their families. Consequently, a number of family level crown group ages were underestimated relative to their known vetted calibrations (e.g., Dromiidae, Dynomenidae, Raninidae, Percnidae, Varunidae, Euryplacidae, and Panopeidae; **Table S2**).

### *Evolution of terrestriality*

In the summary of stochastic character mapping, six total shifts from marine to non-marine were inferred (**Figure S20**). These were at the base of Pseudothelphusoidea, Trichodactylidae, Menippidae, Eriphiidae, and Oziidae, and at the base of the clade of (Thoracotremata, Hymenosomatidae, Potamoidea, Gecarcinucidae). The latter node was split, with slightly higher posterior probability of being freshwater than terrestrial or marine, leading to a freshwater node for the base of (Hymenosomatidae, Potamoidea, Gecarcinucidae) and a terrestrial common ancestor of Thoracotremata. As individual stochastic character maps inferred shifts on branches leading to a single coded tip (e.g., *Carcinus maenas*), the median number of shifts to non-marine was 12. One shift from the freshwater to terrestrial pathway was found in Hymenosomatidae (note, all non-zero grades were collapsed, so the “terrestrial” members here are intertidal). Two shifts from terrestrial to freshwater were found in Glyptograpsidae and Varunidae, respectively. Two reversals to marine were inferred at the clades of Xenophthalmidae and Pinnotheridae, and Cryptochiridae.

Using threshold models for both transition pathways, the best-fitting model was OU based on the lowest output Deviance Information Criterion (DIC) (**Table S6**). For the direct pathway, two shifts to non-marine grades were inferred at nodes: one at the base of Thoracotremata, and one in Menippidae (**Figures 4, S21**). If we consider grades 1 and 2 to be semi-terrestrial (similar to a character state from Tsang et al. [2022] referring to intertidal habitats), then the number of node origins for grades 3–5 is three: one each at the base of Ocypodidae, the clade formed by (Gecarcinidae, Sesarmidae, and Dotillidae), and the clade formed by (Mictyridae, Heloeciidae, Macrophthalmidae, and Varunidae). The last clade features a return to grade 2 at the base of the clade of Macrophthalmidae and Varunidae. Based on the estimated liabilities (i.e., thresholds of change required to transition to a different grade), it is 8–34 times easier to move to grades 1 and 2 than to grades 3 and above (**Table S6, Figure S22A-B**). Six reversals to not being terrestrial via this pathway (i.e., scored as grade 0) are inferred in: Glyptograpsidae, the clade of Xenophthalmidae and Pinnotheridae, Xenograpsidae, Cryptochiridae, Plagusidae, and Varunidae. In the case of Glyptograpsidae and Varunidae, these shifts are to the indirect freshwater pathway (**Figure 4**). Some tips that were coded with a majority of the prior probability failed to infer a shift at any nodes, such as Hymenosomatidae, Eriphiidae, and Oziidae (60% grade 1 for the former, 100% for the latter two), and Gecarcinidae (entirely grades 3–5, with 70% at grades 4 and 5).

For the indirect pathway, four shifts to non-marine grades were inferred at nodes: one at the base of the clades Potamoidea + Gecarcinucidae, and one each for Glyptograpsidae, Pseudothelphusoidea, and Trichodactylidae (**Figures 4, S23**). If we consider grades 1 and 2 to be semi-terrestrial, then only Pseudothelphusoidea and Potamoidea + Gecarcinucidae are inferred (each with nodes at grade 3). The liabilities indicate that it is extremely easy to move to grade 1, but 10 times harder to move to grade 2, and over 100 times harder to move to grade 3 (**Table S6, Figure S22C-D**). Hymenosomatidae has 25% tip prior probabilities at grade 1, but no shifts were inferred. When analyzed as subclades, a transition was inferred from ancestrally freshwater to non-freshwater in Hymenosomatidae (**Figure S24**), but we could not infer a transition from ancestrally terrestrial (direct pathway) to freshwater for Sesarmidae (**Figure S25**).

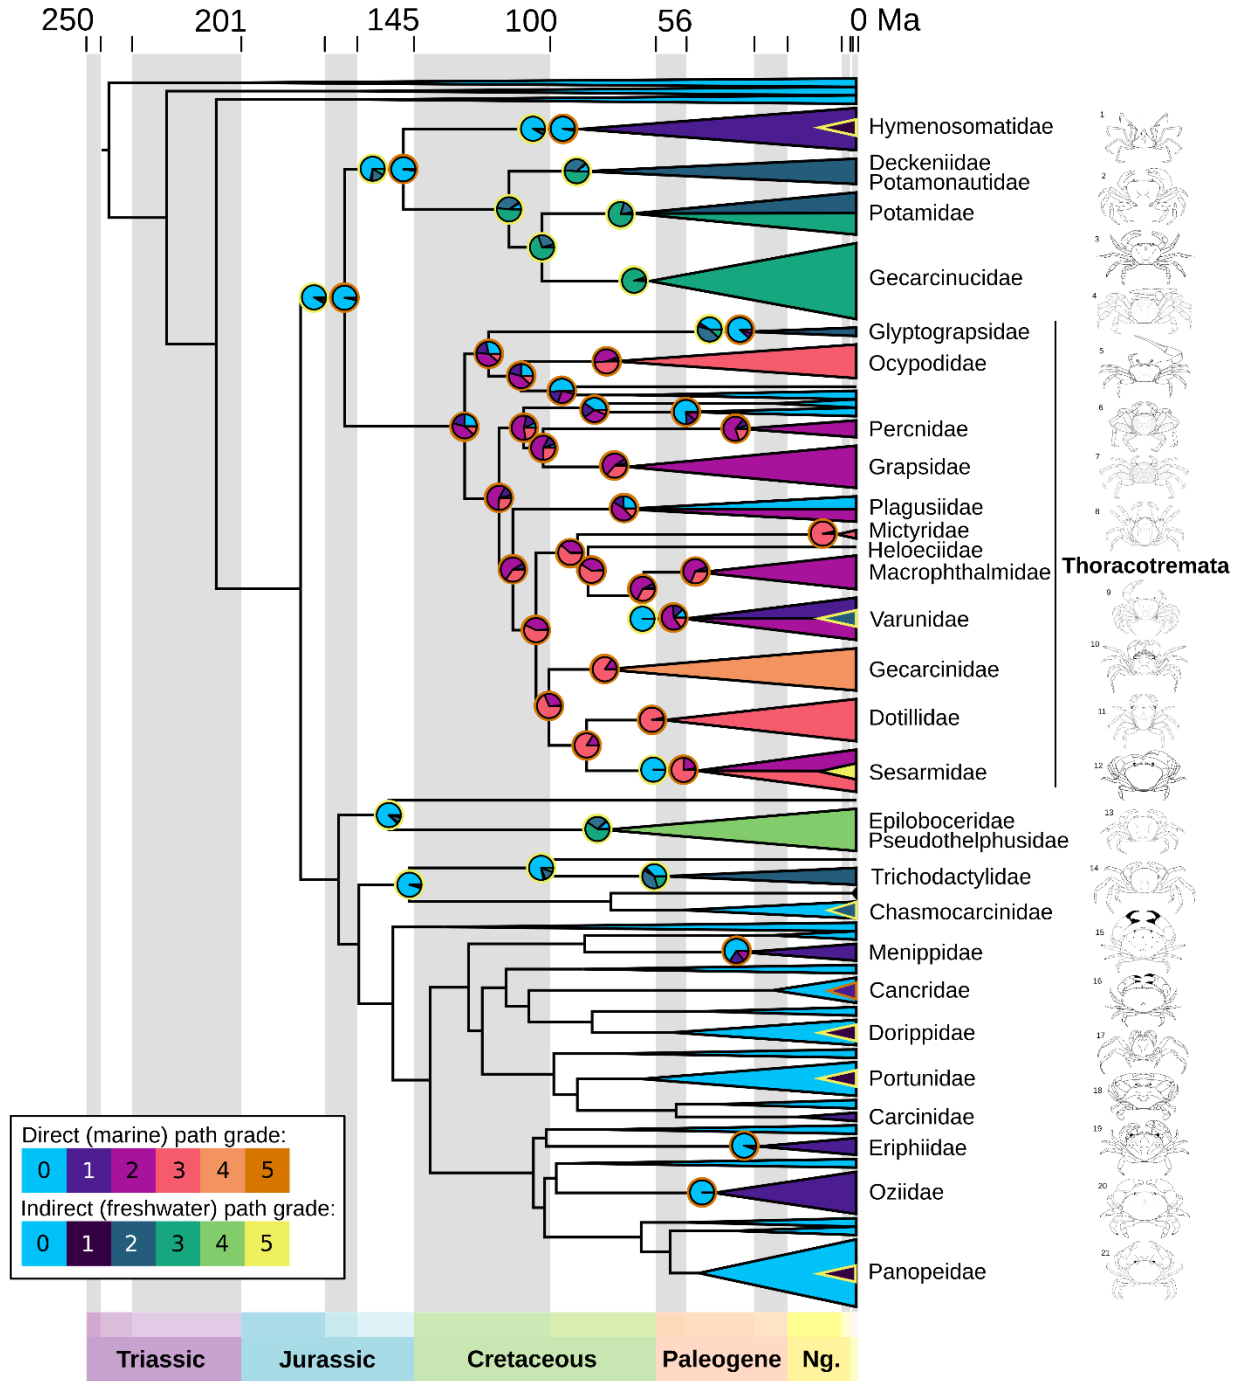

**Figure 4.** Composite of ancestral state reconstructions for the two transition pathways under best-fitting OU models in *ancThresh*, with fully marine clades (all families that are not labeled) reduced for clarity and outgroups removed. Legend for grades and colors representing each pathway at bottom left: fully marine crabs (grade 0), lower intertidal and estuaries (grade 1), upper intertidal and freshwater (grade 2), beaches and riverbanks (grade 3), and coastal forests and jungles (grades 4-5). Pies at nodes represent the estimated ancestral state with the outer ring indicating the pathway (at some nodes, both pathways are shown; when node is inferred marine, none are shown). Tip codings are based on estimates by family (Table S4), with the collapsed clades showing the color that represents the largest slice of their prior probabilities (split in the case of equal probabilities for two grades). For clades that have a small number of taxa in a grade from the opposite pathway, a small triangle is added. Line drawings at right (numbers corresponding to taxa in Table S5), by Javier Luque and Harrison Mancke.

## Discussion

### *Relationships and divergence of true crabs*

Previous molecular phylogenies of Brachyura have been constructed from eight to 10 Sanger loci (Tsang et al. 2014, 2022), mitochondrial genomes (Tang et al. 2017; Tan et al. 2019; Wang et al. 2021; Jennings et al. 2021; Lau et al. 2021; Sun et al. 2022; Zhang et al. 2022), transcriptomics (Ma et al. 2019) and genomic target capture (Wolfe et al. 2019). However, the deep relationships among families and superfamilies remain uncertain, as the most extensive study (Tsang et al. 2014) sampled only 58 of 104 families with eight genes and low support at deep nodes, and more extensive gene sampling was coupled with even lower taxon sampling (Timm and Bracken-Grissom 2015; Wolfe et al. 2019). Although it is evident that the genes we and others have used are insufficient to resolve deep relationships even with current taxon sampling (**Figure S14**), many regions of the tree are strongly supported. For example, the broadest strokes of our topological results (**Figure 2**) contribute to the chorus of molecular and morphological analyses rejecting the monophyly of podotremes (e.g., Ah Yong et al. 2007; Tsang et al. 2014, 2022; Luque et al. 2019a, 2019b; Tan et al. 2019) and heterotremes (e.g., Scholtz and Richter 1995; von Sternberg and Cumberlidge 2001; Tsang et al. 2014; Ma et al. 2019; Tan et al. 2019). Our divergence time estimates exceed most previous publications, except the deeper ages inferred by Wolfe et al. (2019) and the hypotheses of Guinot et al. (2019), but see below for evaluation.

The relationships among thoracotremes were recently examined by Tsang et al. (2022). As in their study, we find polyphyly of Ocypodoidea (fiddler, ghost crabs, and relatives), although our Grapsoidea (shore crabs, land crabs, and relatives) are separated into five clades, as opposed to four in Tsang et al. (2022). The main nodes where our results differ are: (1) the derived position of Dotillidae (sand bubbler crabs), (2) separation of the symbiotic groups Cryptochiridae (coral gall crabs) and Pinnotheridae (pea crabs), and (3) the position of Plagusidae (different between ML and BI in our data: see **Figure S12**). For points (2) and (3), we do recover weak support using all metrics. Ultimately, both studies use eight of the same loci. Our data incorporates the nuclear rRNA genes, with relatively low phylogenetic informativeness above the family level (**Figure S14**), yet both studies produce strong support at the base of thoracotreme families (note that Tsang et al. [2022] designated UF bootstraps > 90% as strong, which would add several nodes to our “strongly supported” category in **Figure 2**). Finally, the backbone of thoracotreme phylogeny has been briefly addressed in two phylogenomic studies (Ma et al. 2019; Wolfe et al. 2019), and our results are similar to both, including the position of Sesamidae (e.g., mangrove and vampire crabs) under models analyzing nucleotide data. A more robust understanding of internal thoracotreme relationships may be derived with additional phylogenomic data, but our results are sufficient to infer ancestral states, with the caveat of lower confidence at the abovementioned nodes.

Polyphyly of the “primary” freshwater crab families (Deckeniidae, Epiloboceridae, Gecarcinucidae, Potamidae, Potamonautidae, Pseudothelphusidae, Trichodactylidae) has been found previously (e.g., von Sternberg and Cumberlidge 2001; Tsang et al. 2022). The inclusion of Hymenosomatidae (pillbox crabs) with the African and Eurasian freshwater groups in our results is novel, as it is the first analysis to incorporate this family in a larger tree. The grouping of African and Eurasian freshwater crabs with thoracotremes is otherwise fairly well supported

in previous studies (e.g., Tang et al. 2017; Ma et al. 2019; Tan et al. 2019; Jennings et al. 2021; Zhang et al. 2022). We contradict previous analyses, where the Neotropical Pseudothelphusoidea were closely related to the freshwater group (Tsang et al. 2014) and share a number of morphological synapomorphies (Cumberlidge et al. 2021). The Neotropical Trichodactylidae were more closely related to other heterotremes. Our results weakly support convergent origins of Pseudothelphusoidea (**Figure 2**), leading to subsequent inference of separate transitions to freshwater. Divergence time estimates under all models push the origin of all primary freshwater groups older than 66 Ma, with the African and Eurasian group over 100 Ma, consistent with a deeper cryptic history (Wolfe et al. 2019), particularly in non-marine environments (Tsang et al. 2014; Luque et al. 2021). Nevertheless, our mean divergence time estimates post-date the complete breakup of Pangaea (approximately 175 Ma), and do not support the Gondwanan origin of freshwater crabs (Klaus et al. 2011; Tsang et al. 2014) with these data.

Many of the relationships among families and superfamilies of the remaining heterotremes are not critical for the question of terrestriality. However, most of the deep relationships that we do observe, even with poor nodal support from ML, are congruent with the broad results retrieved from target capture of over 400 loci (Wolfe et al. 2019), except for the position of Menippidae (stone crabs). Our topologies for the relationships within superfamilies are largely congruent with previous Sanger data (Tsang et al. 2014), with some families exchanging places (e.g., Evans 2018; Mendoza et al. 2022) and some other groups with previous conflict still unresolved (Hultgren and Stachowicz 2008; Lai et al. 2014; Windsor and Felder 2014). The position of Dorippoidea nested well within heterotremes is consistent with previous molecular analysis (Tsang et al. 2014), but may confound hypotheses of early fossils that assume dorippoids are the earliest eubrachyuran branch (e.g., Guinot et al. 2019). One potentially novel result is the polyphyly of Bythograeoidea (hydrothermal vent crabs), that had not previously been included in a global analysis with as many genera (absent from Tsang et al. [2014]; no outgroups in concatenated analyses of Mateos et al. [2012]). Several non-monophyletic families were broken up by the insertion of closely related families, perhaps representing morphological groups that could be redefined as subfamilies (e.g., Lyreididae, Iphiculidae, potentially the cyclodorippid genus *Tymolus*). In summary, we observe many similarities with previous analyses, and some new hypotheses that await improved molecular sampling before suggesting new systematic changes.

#### *Which divergence time estimates are reliable?*

The factors that we investigated for different methodological choices were the calibration strategy and the clock model. Although divergence time estimates have only been visualized previously for only one dataset of echinoids with *chronospace* (Mongiardino Koch et al. 2022), we see significant differences in our data. Our results were impacted by the tested methods even more substantially than in the echinoid data, for which the results were sensitive to clock model choice, but not to substitution model or subsets of loci (Mongiardino Koch et al. 2022). In our data, a strong separation of variance of both clock model and calibration strategy were observed (**Figure 3A, B**), with a similar pattern of posterior ages from both factors (**Figure 3C**). However, the random local clock model, which accounts for the evolution of evolutionary rates in a clade-specific manner (Drummond and Suchard 2010; Ho and Duchêne 2014), failed to converge after months of runtime, so we cannot be certain of the ultimate effect on divergence time estimates.



We were initially interested in using FBD and BDSS because these tree models describe the processes of speciation, extinction, and fossil sampling that led to the true tree, and could be more accurate (Wright et al. 2022). A precursor method that incorporates fossil counts, but not directly into the tree model, has been previously used for lobsters (Bracken-Grissom et al. 2014). Although the gold standard for improved age accuracy is to couple process-based tree models with total evidence tip dating (i.e., morphological character data from all incorporated fossils), it was not possible to include over 300 extant taxa, plus numerous fossils. Brachyura have a somewhat good fossil record: they preserve abundant biomineralized hard parts, but the majority are dorsal carapaces and cheliped fragments. It is challenging to identify phylogenetically diagnostic characters in fragmented fossils due to substantial convergence in carapace and cheliped morphology (Guinot 2019; Luque et al. 2019b, 2021; Wolfe et al. 2021), and extensive missing data that could compromise their placement within crown groups. Nevertheless, our evaluation of the brachyuran fossil record in the context of vetted crown and stem groups identified many calibration fossils that were much older than previously appreciated. Most crown group families have exemplars preserved in the Eocene and Paleogene (66–34 Ma), as well as an increasing number of well-preserved Cretaceous fossils (Ossó 2016; Luque et al. 2017, 2021).

Although records are abundant in the PBDB, brachyuran fossil sampling is not as evenly distributed as in many clades used as test cases for the performance of FBD and skyline models (e.g., Gavryushkina et al. 2014; Heath et al. 2014; Renner et al. 2016; Barido-Sottani et al. 2019; O'Reilly and Donoghue 2020). Subsampling a fossil record using the unresolved FBD can be accurate with an evenly sampled clade such as cetaceans (Barido-Sottani et al. 2019), but can be highly inaccurate if the fossils have limited phylogenetic information (O'Reilly and Donoghue 2020). A recent analysis of mammals (Luo et al. 2021), however, found that fossil sampling density does not have linear effects on divergence time estimates. Altogether, it is difficult to generalize about the best models, unless prior knowledge is contradicted.

A major issue was estimating the root age of Meiura. Brachyura have a known ghost lineage, with stem group members *Eocarcinus* and *Eoprosopon* from the early Jurassic (approximately 190 Ma; Haug and Haug 2014; Hegna et al. 2020; Scholtz 2020; Wolfe et al. 2021). The oldest crown group brachyuran fossil occurrences in PBDB were also from the early Jurassic, representing less than 1% of total occurrences. Meanwhile, multiple modern anomuran families were already present in the late Jurassic (164–145 Ma; e.g., Fraaije et al. 2019, 2022; Robins and Klompmaker 2019), when their divergence likely took place (Bracken-Grissom et al. 2013; Wolfe et al. 2019), strongly suggesting the divergence of the common ancestor of Meiura, and probably Brachyura, happened in the very earliest, or more likely prior to, the Jurassic. Yet, the FBD and BDSS analyses, despite incorporating a small number of Jurassic occurrences, inferred impossibly young ages, as observed by O'Reilly and Donoghue (2020). Even the BDSS analysis including a time slice with no fossil sampling before the oldest occurrence (allowing a ghost lineage: Culshaw et al. 2019; O'Reilly and Donoghue 2020) seemed to be a poor fit, and could not avoid estimating an unreasonably young root age. As such, given the data currently available for brachyurans, we recommend the use of vetted calibrations and a simple model over process-based tree models subsampling the entire record. We recommend caution if using FBD models (and their extensions) to estimate divergences when a morphological matrix is unavailable.

### *How many times and when did crabs terrestrialize?*

The number of estimated shifts to terrestriality changes when considering additional crabs with known tip states in our data. We inferred five or six shifts to non-marine lifestyles at nodes, fewer than Tsang et al. (2022) within Thoracotremata alone. All shifts occur at well-supported nodes (**Figures 2, 4**), although the common ancestor of (Thoracotremata, Hymenosomatidae, Potamoidea, Gecarcinucidae) has only moderate support, perhaps contributing to the uncertainty at this node with stochastic mapping (**Figure S20**). However, at least nine additional families have some proportion of their prior probability in grades 1–2 (some all the way up to 100%, but most with lower probabilities), nested among marine sisters (**Figure 4**). Adding these brings the number of transitions to 14, distributed from Cretaceous to the last 10 million years. Although it is not included in the molecular phylogeny, there was likely another convergent transition to non-marine lifestyle in the Cretaceous fossil *Cretapsara* (Luque et al. 2021), resulting in a total of at least 15 terrestrialization events across at least 30 families.

The three to four losses of terrestriality that we estimate include some nodes with poor support (the Cretaceous Xenograpsidae and Cryptochiridae, and the Eocene Plagusiididae). Character sequence reversals are not often favored by threshold models (Revell 2014), so it is intriguing that we find these nodes. Across the tree of eukaryotic life, reversals to marine from non-marine lifestyles are more common than expected (Jamy et al. 2022), and more have been found in Thoracotremata (Tsang et al. 2022), so we could indeed be underestimating the phenomenon of returning to a marine environment.

Across plants and animals, more terrestrial species come from freshwater ancestors (Román-Palacios et al. 2022), a pathway we only observe potentially once, in Hymenosomatidae. We estimate two instances of freshwater crabs evolving from terrestrial ancestors, in Glyptograpsidae and Varunidae. Owing to the ordering of grades through the transition pathways, and the implementation of *ancThresh*, it is very challenging to infer these changes. The estimated liabilities are too high to infer freshwater Sesarmidae from a terrestrial ancestor, although this is further complicated by a higher base grade (i.e., starting at grade 2–3) within the two transition pathways, and possibly by the number of species that have convergently evolved arboreal lifestyles in mangroves (Fratini et al. 2005; Naruse and Ng 2020) and in freshwater derived habitats (Diesel 1989). These four clades are, however, the only brachyuran groups where the data suggest transitions between the main pathways, so the overall number of convergent events is not affected.

### *Implications for early phases of arthropod terrestrialization*

An outstanding question is the lifestyle of the common ancestor of the clade containing the majority of non-marine crabs: Thoracotremata, Hymenosomatoidea, Potamoidea, Gecarcinucoidea. Stochastic character mapping suggests the state of this node is uncertain (**Figure S20**), although the common ancestor may have been estuarine and likely lived in the Jurassic. It is also quite possible that the common ancestor was marine (**Figure 4**), and direct and indirect pathways were established independently in the thoracotreme and freshwater clades. If the ancestor was estuarine, the Early Cretaceous common ancestor of Thoracotremata transitioned from the indirect pathway to a likely intertidal grade on the direct pathway. Crabs in low grades of both transition pathways have different osmoregulatory adaptations (Watson-Zink 2021), so perhaps this common ancestor ecologically resembled some modern

Hymenosomatidae (**Table S3**), or resembled a hypothesis based on the only non-marine Cretaceous body fossil (Luque et al. 2021). The common ancestor could have had some degree of osmoregulatory ability, perhaps experiencing early development in marine or estuarine environments (Watson-Zink 2021).

The hypothetical common ancestor of many terrestrialized crabs, developed above, offers some lessons for understanding the Paleozoic terrestrialization of other arthropod groups. Despite a discrepancy of 100–150 Ma between divergence time estimates and body fossils, there are examples of Cambrian and Ordovician trace fossils that reveal limited excursions into non-marine environments, and perhaps more extensive life in marginal marine settings (e.g., Collette et al. 2010; Mángano et al. 2021; Buatois et al. 2022). Therefore, the fluidity of crab transitions into lower grades of terrestriality could hint at the types of adaptations other arthropods experienced in these early periods: osmoregulation and abbreviated and/or migratory larval development (Watson-Zink 2021). Other ecologies may resemble fiddler crabs that have adapted to coastal hypersaline environments, building their burrows well inland (Thurman 1984).

Additional instances of small numbers of taxa entering grades 1–2 through either pathway (e.g., Carcinidae, Panopeidae, freshwater Varunidae in **Figure 4**) could provide some insights on the early stages of terrestrial adaptation. In particular, the above examples harbor some of the most invasive crab taxa: *Carcinus maenas* (European green crab), *Hemigrapsus sanguineus* (Asian shore crab), and *Rhithropanopeus harrisi*. These species are notable for tolerating exceptionally wide-ranging salinities as larvae, and have wide and migratory habitat preferences as adults (e.g., Young and Elliott 2020). The invasive *Eriocheir sinensis* (Chinese mitten crab) can tolerate estuarine to full freshwater (Zhang et al. 2019). Another example is the hymenosomatid *Halicarcinus planatus*, with a wide salinity tolerance that could help this species adapt to, and invade, warming Antarctic waters (López-Farrán et al. 2021). Many other hymenosomatid genera have members in both freshwater and low salinity estuarine/mangrove habitats, and many have plastic osmoregulatory capabilities (Chuang and Ng 1994). Perhaps the ancestors of diverse non-marine groups originated with lifestyles similar to successful invaders.

Groups sharing convergent morphological adaptations to higher grades of terrestriality, such as branchiostegal lungs in Gecarcinucidae, Gecarcinidae, Ocypodidae, and Pseudothelphusidae, or water-wicking setae in Gecarcinidae and Sesarmidae (Watson-Zink 2021 and **Table S3**), are deeply separated by over 150 Ma of evolution. Convergent terrestrial morphology in crabs, with likely pathways through a habitat gradient, perhaps with some traits of invasive taxa, could illuminate the hypothesis that arachnids convergently transitioned to terrestriality (Ballesteros et al. 2022). However, it is possible that horseshoe crabs (chelicerates, not decapods) returned to marine habitats even if they are phylogenetically nested within arachnids, as our crab analyses have inferred at least two Cretaceous reversals that involved likely intertidal (grade 2) ancestors.

## Conclusions

Herein, we inferred a large molecular phylogeny of true crabs, estimated divergence times that were older than previously thought, and estimated the number of transitions from marine to non-marine lifestyles. We found up to 15 convergent transitions through direct and

indirect pathways, with at least three climbing to higher degrees of terrestrial adaptation. The most highly terrestrial clades were some of the oldest non-marine inferences in our data, with their common ancestors having diverged over 66 Ma. At least nine more recent events throughout the Cenozoic led to crabs living in intertidal and marginal marine environments, a shift that is estimated to be much easier based on lower threshold liability and likely fewer traits required. As instances of convergent evolution provide emerging models in the form of “natural experiments”, the framework we have developed to compare the gradient of adaptations will enable future research that aims to “predict” the constraints leading to repeated trait evolution and better understand the drivers of biodiversity across related groups.

## **Author Contributions**

JMW, KAC, DLF, HDBG conceived the project; STA, TYC, KHC, KAC, SRD, DLF, JWM, PKLN, EPT, NDP, RR, BPT, LMT, RW, AMW, HDBG provided samples; HDBG, EPT, RR, BPT, LMT, AMW extracted DNA and conducted sequencing; LB, HDBG curated sequence data; LB conducted phylogenetic analysis; JL vetted fossil calibrations; JMW, JBS developed and performed divergence time analysis; JMW, VMWZ coded natural history; JMW performed comparative methods and wrote the manuscript with input from all authors.

## **Supplementary Material**

Data available from the Dryad Digital Repository: <https://doi.org/10.5061/dryad.tmpg4f52z>

## **Funding**

This work was supported by the US National Science Foundation DEB #1856679 to JMW and JOH, DEB #1856667 to HDBG, DEB-EF #0531603 to DLF, DEB-EF #0531616 to JWM, and DEB-EF #0531762 to KAC.

## **Acknowledgments**

The captain and crew of the R/V Pelican, R/V Weatherbird, R/V Urraca, R/V Hogarth and R/V Point Sur are recognized for assisting in specimen collections over the past 15 years. The staff and scientists at the US National Museum of Natural History: Smithsonian Institution, NIWA Invertebrate Collection, Natural History Museum of Los Angeles County, Universidad Nacional Autónoma de México, Smithsonian Tropical Marine Station: Bocas del Toro kindly assisted with shipping of loans, or hosting our visits. We thank Z. Nickell and many undergraduate students at Brigham Young University and Florida International University that assisted with museum curation, tissue plucking, DNA extractions and sequencing. We thank N. Mongiardino Koch for assistance with chronospace scripts, and L. Sallan for assistance with threshold models. Computations in this paper were run on the FASRC Cannon cluster supported by the FAS Division of Science Research Computing Group at Harvard University and the Florida International University High-Performance Computing Cluster (HPCC). This paper is contribution #xxx from the Coastlines and Oceans Division of the Institute of Environment at Florida International University.

## References

- Ahyong S.T., Lai J.C.Y., Sharkey D., Colgan D.J., Ng P.K.L. 2007. Phylogenetics of the brachyuran crabs (Crustacea: Decapoda): The status of Podotremata based on small subunit nuclear ribosomal RNA. *Molecular Phylogenetics and Evolution*. 45:576–586.
- Ballesteros J.A., Santibáñez-López C.E., Baker C.M., Benavides L.R., Cunha T.J., Gainett G., Ontano A.Z., Setton E.V.W., Arango C.P., Gavish-Regev E., Harvey M.S., Wheeler W.C., Hormiga G., Giribet G., Sharma P.P. 2022. Comprehensive species sampling and sophisticated algorithmic approaches refute the monophyly of Arachnida. *Molecular Biology and Evolution*. 39:msac021.
- Barido-Sottani J., Aguirre-Fernández G., Hopkins M.J., Stadler T., Warnock R.C. 2019. Ignoring stratigraphic age uncertainty leads to erroneous estimates of species divergence times under the fossilized birth-death process. *Proceedings of the Royal Society B: Biological Sciences*. 286:20190685.
- Barido-Sottani J., Pohle A., De Baets K., Murdock D., Warnock R.C.M. 2022. Putting the F in FBD analyses: tree constraints or morphological data? *BioRxiv*.
- Barido-Sottani J., van Tiel N., Hopkins M.J., Wright D.F., Stadler T., Warnock R.C.M. 2020. Ignoring fossil age uncertainty leads to inaccurate topology and divergence times in time calibrated tree inference. *Frontiers in Ecology and Evolution*. 8:183.
- Benavides L.R., Edgecombe G.D., Giribet G. 2023. Re-evaluating and dating myriapod diversification with phylotranscriptomics under a regime of dense taxon sampling. *Molecular Phylogenetics and Evolution*. 178:107621.
- Bernot J.P., Owen C.L., Wolfe J.M., Meland K., Olesen J., Crandall A. 2022. Major revisions in pancrustacean phylogeny with recommendations for resolving challenging nodes. *BioRxiv*:56.
- Bliss D.E. 1968. Transition from water to land in decapod crustaceans. *American Zoologist*. 8:355–392.
- Bollback J.P. 2006. SIMMAP: stochastic character mapping of discrete traits on phylogenies. *BMC Bioinformatics*. 7:88.
- Bouckaert R., Vaughan T.G., Barido-Sottani J., Duchêne S., Fourment M., Gavryushkina A., Heled J., Jones G., Kühnert D., De Maio N., Matschiner M., Mendes F.K., Müller N.F., Ogilvie H.A., du Plessis L., Poppinga A., Rambaut A., Rasmussen D., Siveroni I., Suchard M.A., Wu C.-H., Xie D., Zhang C., Stadler T., Drummond A.J. 2019. BEAST 2.5: An advanced software platform for Bayesian evolutionary analysis. *PLoS Comput Biol*. 15:e1006650.
- Bracken H.D., Toon A., Felder D.L., Martin J.W., Finley M., Rasmussen J., Palero F., Crandall K.A. 2009. The decapod tree of life: compiling the data and moving toward a consensus of decapod evolution. *Arthropod Systematics & Phylogeny*. 67:99–116.
- Bracken-Grissom H.D., Ahyong S.T., Wilkinson R.D., Feldmann R.M., Schweitzer C.E., Breinholt J.W., Bendall M., Palero F., Chan T.-Y., Felder D.L., Robles R., Chu K.-H., Tsang L.-M., Kim D., Martin J.W., Crandall K.A. 2014. The Emergence of Lobsters: Phylogenetic Relationships, Morphological Evolution and Divergence Time Comparisons of an Ancient Group (Decapoda: Achelata, Astacidea, Glypheidea, Polychelida). *Systematic Biology*. 63:457–479.
- Bracken-Grissom H.D., Cannon M.E., Cabezas P., Feldmann R.M., Schweitzer C.E., Ahyong S.T., Felder D.L., Lemaitre R., Crandall K.A. 2013. A comprehensive and integrative reconstruction of evolutionary history for Anomura (Crustacea: Decapoda). *BMC Evolutionary Biology*. 13:128.
- Buatois L.A., Davies N.S., Gibling M.R., Krapovickas V., Labandeira C.C., MacNaughton R.B., Mángano M.G., Minter N.J., Shillito A.P. 2022. The Invasion of the Land in Deep Time: Integrating Paleozoic Records of Paleobiology, Ichnology, Sedimentology, and Geomorphology. *Integrative and Comparative Biology*. 62:297–331.
- Buhay J.E., Moni G., Mann N., Crandall K.A. 2007. Molecular taxonomy in the dark: Evolutionary history, phylogeography, and diversity of cave crayfish in the subgenus *Aviticambarus*, genus *Cambarus*. *Molecular Phylogenetics and Evolution*. 42:435–448.
- Castresana J. 2000. Selection of Conserved Blocks from Multiple Alignments for Their Use in Phylogenetic Analysis. *Molecular Biology and Evolution*. 17:540–552.
- Chernomor O., von Haeseler A., Minh B.Q. 2016. Terrace Aware Data Structure for Phylogenomic Inference from Supermatrices. *Systematic Biology*. 6:997–1008.
- Chuang C.T.N., Ng P.K.L. 1994. The ecology and biology of Southeast Asian false spider crabs (Crustacea: Decapoda: Brachyura: Hymenosomatidae). *Hydrobiologia*. 285:85–92.

- Colgan D.J., McLauchlan A., Wilson G.D.F., Livingston S.P., Edgecombe G.D., Macaranas J., Cassis G., Gray M.R. 1998. Histone H3 and U2 snRNA DNA sequences and arthropod molecular evolution. *Aust. J. Zool.* 46:419.
- Collette J.H., Hagadorn J.W., Lacelle M.A. 2010. Dead in Their Tracks--Cambrian Arthropods and Their Traces from Intertidal Sandstones of Quebec and Wisconsin. *PALAIOS*. 25:475–486.
- Crandall K.A., Fitzpatrick J.F. 1996. Crayfish Molecular Systematics: Using a Combination of Procedures to Estimate Phylogeny. *Systematic Biology*. 45:1–26.
- Culshaw V., Stadler T., Sanmartín I. 2019. Exploring the power of Bayesian birth-death skyline models to detect mass extinction events from phylogenies with only extant taxa. *Evolution*. 73:1133–1150.
- Cumberlidge N., Johnson E.C., Leever E.M., Soma J.B., Ahles K.M., Kamanli S.A., Clark P.F. 2021. The significance of female dimorphic characters of primary freshwater crabs for the systematics of Eubrachyura (Crustacea: Decapoda: Brachyura). *Journal of Crustacean Biology*. 41:1–27.
- Cumberlidge N., Ng P. 2009. Systematics, Evolution, and Biogeography of Freshwater Crabs. In: Martin J., Crandall K., Felder D., editors. *Crustacean Issues: Decapod Crustacean Phylogenetics*. Leiden: CRC Press. p. 491–508.
- Cumberlidge N., Ng P.K.L., Yeo D.C.J., Magalhães C., Campos M.R., Alvarez F., Naruse T., Daniels S.R., Esser L.J., Attipoe F.Y.K., Clotilde-Ba F.-L., Darwall W., McIvor A., Baillie J.E.M., Collen B., Ram M. 2009. Freshwater crabs and the biodiversity crisis: Importance, threats, status, and conservation challenges. *Biological Conservation*. 142:1665–1673.
- Davis K.E., De Grave S., Delmer C., Payne A.R.D., Mitchell S., Wills M.A. 2022. Ecological Transitions and the Shape of the Decapod Tree of Life. *Integrative and Comparative Biology*. 62:332–344.
- Diesel R. 1989. Parental care in an unusual environment: *Metopaulius depressus* (Decapoda: Grapsidae), a crab that lives in epiphytic bromeliads. *Animal Behaviour*. 38:561–575.
- Drummond A.J., Ho S.Y.W., Phillips M.J., Rambaut A. 2006. Relaxed Phylogenetics and Dating with Confidence. *PLoS Biology*. 4:e88.
- Drummond A.J., Suchard M.A. 2010. Bayesian random local clocks, or one rate to rule them all. *BMC Biol.* 8:114.
- Edgecombe G.D., Strullu-Derrien C., Góral T., Hetherington A.J., Thompson C., Koch M. 2020. Aquatic stem group myriapods close a gap between molecular divergence dates and the terrestrial fossil record. *Proc Natl Acad Sci USA*. 117:8966–8972.
- Evans N. 2018. Molecular phylogenetics of swimming crabs (Portunoidea Rafinesque, 1815) supports a revised family-level classification and suggests a single derived origin of symbiotic taxa. *PeerJ*. 6:e4260.
- Fraaije R., Robins C., van Bakel B.W.M., Jagt J.W.M., Bachmayer F. 2019. Paguroid anomurans from the Tithonian Ernstbrunn Limestone, Austria – the most diverse extinct paguroid assemblage on record. *Annalen des Naturhistorischen Museums in Wien*. 121:257–289.
- Fraaije R.H., Klompmaker A.A., Jagt J.W., Krobicki M., van Bakel B.W. 2022. A new, highly diverse paguroid assemblage from the Oxfordian (Upper Jurassic) of southern Poland and its environmental distribution. *Neues Jahrbuch für Geologie und Paläontologie-Abhandlungen*. 304:1–12.
- Fratini S., Vannini M., Cannicci S., Schubart C.D. 2005. Tree-climbing mangrove crabs: a case of convergent evolution. *Evolutionary Ecology Research*. 7:219–233.
- Gavryushkina A., Welch D., Stadler T., Drummond A.J. 2014. Bayesian Inference of Sampled Ancestor Trees for Epidemiology and Fossil Calibration. *PLoS Computational Biology*. 10:e1003919.
- Guinot D. 2019. New hypotheses concerning the earliest brachyurans (Crustacea, Decapoda, Brachyura). *Geodiversitas*. 41:747–796.
- Guinot D., Carbot-Chanona G., Vega F.J. 2019. Archaeochiapiasidae n. fam., a new early Cenomanian brachyuran family from Chiapas, Mexico, new hypothesis on Lecythocaridae Schweitzer & Feldmann, 2009, and phylogenetic implications (Crustacea, Decapoda, Brachyura, Eubrachyura). *Geodiversitas*. 41:285–322.
- Hartnoll R.G. 1988. Evolution, Systematics, and Geographical Distribution. In: Burggren W.W., McMahon B.R., editors. *Biology of the Land Crabs*. Cambridge: Cambridge University Press. p. 6–54.
- Haug J.T., Haug C. 2014. *Eoprosopon klugi* (Brachyura)–the oldest unequivocal and most “primitive” crab reconsidered. *Palaeodiversity*. 7:149–158.
- Heath T.A., Huelsenbeck J.P., Stadler T. 2014. The fossilized birth-death process for coherent calibration of divergence-time estimates. *Proceedings of the National Academy of Sciences*. 111:E2957–E2966.
- Hegna T.A., Luque J., Wolfe J.M. 2020. The fossil record of the Pancrustacea. In: Poore G.C.B., Thiel M., editors. *Evolution and Biogeography*. Oxford: Oxford University Press. p. 21–52.
- Ho S.Y.W., Duchêne S. 2014. Molecular-clock methods for estimating evolutionary rates and timescales. *Molecular Ecology*. 23:5947–5965.

- Hoang D.T., Chernomor O., von Haeseler A., Minh B.Q., Vinh L.S. 2018. UFBoot2: Improving the Ultrafast Bootstrap Approximation. *Molecular Biology and Evolution*. 35:518–522.
- Hultgren K.M., Stachowicz J.J. 2008. Molecular phylogeny of the brachyuran crab superfamily Majoidea indicates close congruence with trees based on larval morphology. *Molecular Phylogenetics and Evolution*. 48:986–996.
- Jamy M., Biwer C., Vaulot D., Obiol A., Jing H., Peura S., Massana R., Burki F. 2022. Global patterns and rates of habitat transitions across the eukaryotic tree of life. *Nat Ecol Evol*. 6:1458–1470.
- Jennings L.A., Blakeslee A.M.H., McCoy K.A., Behringer D.C., Bojko J. 2021. Systematic assessment of the Panopeidae and broader Eubrachyura (Decapoda: Brachyura) using mitochondrial genomics. *Arthropod Systematics & Phylogeny*. 79:569–585.
- Kalyaanamoorthy S., Minh B.Q., Wong T.K.F., von Haeseler A., Jermiin L.S. 2017. ModelFinder: fast model selection for accurate phylogenetic estimates. *Nature Methods*. 14:587–589.
- Katoh K., Standley D.M. 2013. MAFFT Multiple Sequence Alignment Software Version 7: Improvements in Performance and Usability. *Molecular Biology and Evolution*. 30:772–780.
- Kearse M., Moir R., Wilson A., Stones-Havas S., Cheung M., Sturrock S., Buxton S., Cooper A., Markowitz S., Duran C., Thierer T., Ashton B., Meintjes P., Drummond A. 2012. Geneious Basic: An integrated and extendable desktop software platform for the organization and analysis of sequence data. *Bioinformatics*. 28:1647–1649.
- Klaus S., Yeo D.C.J., Ah Yong S.T. 2011. Freshwater crab origins—Laying Gondwana to rest. *Zoologischer Anzeiger*. 250:449–456.
- Lai J.C.Y., Thoma B.P., Clark P.F., Felder D.L., Ng P.K.L. 2014. Phylogeny of eriphioid crabs (Brachyura, Eriphioidea) inferred from molecular and morphological studies. *Zoologica Scripta*. 43:52–64.
- Lamsdell J.C., McCoy V.E., Perron-Feller O.A., Hopkins M.J. 2020. Air Breathing in an Exceptionally Preserved 340-Million-Year-Old Sea Scorpion. *Current Biology*. 30:4316–4321.
- Lau N.-S., Sam K.-K., Ahmad A.B., Siti K.-A., Ahmad Zafir A.W., Shu-Chien A.C. 2021. Gene Arrangement and Adaptive Evolution in the Mitochondrial Genomes of Terrestrial Sesamid Crabs *Geosesarma faustum* and *Geosesarma penangensis*. *Front. Ecol. Evol*. 9:778570.
- López-Farrán Z., Guillaumot C., Vargas-Chacoff L., Paschke K., Dulière V., Danis B., Poulin E., Saucède T., Waters J., Gérard K. 2021. Is the southern crab *Halicarcinus planatus* (Fabricius, 1775) the next invader of Antarctica? *Glob Change Biol*. 27:3487–3504.
- López-Giráldez F., Townsend J.P. 2011. PhyDesign: an online application for profiling phylogenetic informativeness. *BMC Evolutionary Biology*. 11:152.
- Luo A., Zhang C., Zhou Q.-S., Ho S.Y.W., Zhu C.-D. 2021. Impacts of Taxon-Sampling Schemes on Bayesian Molecular Dating under the Unresolved Fossilized Birth-Death Process. *BioRxiv*.
- Luque J., Allison W.T., Bracken-Grissom H.D., Jenkins K.M., Palmer A.R., Porter M.L., Wolfe J.M. 2019a. Evolution of crab eye structures and the utility of ommatidia morphology in resolving phylogeny. *BioRxiv*.
- Luque J., Feldmann R.M., Vernygora O., Schweitzer C.E., Cameron C.B., Kerr K.A., Vega F.J., Duque A., Strange M., Palmer A.R., Jaramillo C. 2019b. Exceptional preservation of mid-Cretaceous marine arthropods and the evolution of novel forms via heterochrony. *Science Advances*. 5:eaav3875.
- Luque J., Schweitzer C.E., Santana W., Portell R.W., Vega F.J., Klompmaker A.A. 2017. Checklist of fossil decapod crustaceans from tropical America. Part I: Anomura and Brachyura. *Nauplius*. 25:1–85.
- Luque J., Xing L., Briggs D.E.G., Clark E.G., Duque A., Hui J., Mai H., McKellar R.C. 2021. Crab in amber reveals an early colonization of nonmarine environments during the Cretaceous. *Science Advances*. 7:eabj5689.
- Ma K.Y., Qin J., Lin C.-W., Chan T.-Y., Ng P.K.L., Chu K.H., Tsang L.M. 2019. Phylogenomic analyses of brachyuran crabs support early divergence of primary freshwater crabs. *Molecular Phylogenetics and Evolution*. 135:62–66.
- Mángano M.G., Buatois L.A., Waisfeld B.G., Muñoz D.F., Vaccari N.E., Astini R.A. 2021. Were all trilobites fully marine? Trilobite expansion into brackish water during the early Palaeozoic. *Proc. R. Soc. B*. 288:20202263.
- Mateos M., Hurtado L.A., Santamaria C.A., Leignel V., Guinot D. 2012. Molecular Systematics of the Deep-Sea Hydrothermal Vent Endemic Brachyuran Family Bythograeidae: A Comparison of Three Bayesian Species Tree Methods. *PLoS ONE*. 7:e32066.
- Medlin L., Elwood H.L., Stickel S., Sogin M.L. 1988. The characterization of enzymatically amplified eukaryotic 16S-like rRNA-coding regions. *Gene*. 71:491–499.

- Mendoza J.C.E., Chan K.O., Lai J.C.Y., Thoma B.P., Clark P.F., Guinot D., Felder D.L., Ng P.K.L. 2022. A comprehensive molecular phylogeny of the brachyuran crab superfamily Xanthoidea provides novel insights into its systematics and evolutionary history. *Molecular Phylogenetics and Evolution*. 177:107627.
- Minh B.Q., Hahn M.W., Lanfear R. 2020a. New Methods to Calculate Concordance Factors for Phylogenomic Datasets. *Molecular Biology and Evolution*. 37:2727–2733.
- Minh B.Q., Schmidt H., Chernomor O., Schrempf D., Woodhams M., von Haeseler A., Lanfear R. 2020b. IQ-TREE 2: New models and efficient methods for phylogenetic inference in the genomic era. *Molecular Biology and Evolution*. 37:1530–1534.
- Mo Y.K., Lanfear R., Hahn M.W., Minh B.Q. 2022. Updated site concordance factors minimize effects of homoplasy and taxon sampling. *Bioinformatics*.:1–2.
- Mongiardino Koch N., Thompson J.R., Hatch A.S., McCowin M.F., Armstrong A.F., Coppard S.E., Aguilera F., Bronstein O., Kroh A., Mooi R., Rouse G.W. 2022. Phylogenomic analyses of echinoid diversification prompt a re-evaluation of their fossil record. *eLife*. 11:e72460.
- Naruse T., Ng P.K.L. 2020. Revision of the sesarmid crab genera *Labuanium* Serène and Soh, 1970, *Scandarma* Schubart, Liu and Cuesta, 2003 and *Namlacium* Serène and Soh, 1970 (Crustacea: Decapoda: Brachyura: Sesarmidae), with descriptions of four new genera and two new species. *Journal of Natural History*. 54:445–532.
- Ng P.L.K., Guinot D., Davie P.J.F. 2008. Systema Brachyurorum: Part I. An annotated checklist of extant brachyuran crabs of the world. *Raffles Bulletin of Zoology*. 17:1–286.
- O’Reilly J.E., Donoghue P.C.J. 2020. The Effect of Fossil Sampling on the Estimation of Divergence Times with the Fossilized Birth–Death Process. *Systematic Biology*. 69:124–138.
- Ossó À. 2016. *Eogeryon elegius* n. gen. and n. sp. (Decapoda: Eubrachyura: Portunoidea), one of the oldest modern crabs from late Cenomanian of the Iberian Peninsula. *Boletín de la Sociedad Geológica Mexicana*. 68:231–246.
- Palero F., Guerao G., Abello P. 2008. Morphology of the final stage phyllosoma larva of *Scyllarus pygmaeus* (Crustacea: Decapoda: Scyllaridae), identified by DNA analysis. *Journal of Plankton Research*. 30:483–488.
- Parham J.F., Donoghue P.C.J., Bell C.J., Calway T.D., Head J.J., Holroyd P.A., Inoue J.G., Irmis R.B., Joyce W.G., Ksepka D.T., Patane J.S.L., Smith N.D., Tarver J.E., van Tuinen M., Yang Z., Angielczyk K.D., Greenwood J.M., Hipsley C.A., Jacobs L., Makovicky P.J., Muller J., Smith K.T., Theodor J.M., Warnock R.C.M., Benton M.J. 2012. Best Practices for Justifying Fossil Calibrations. *Systematic Biology*. 61:346–359.
- Poore G.C.B., Ahyong S.T. 2023. Marine decapod Crustacea: a guide to the families and genera of the world. CSIRO Publishing.
- Powers L.W., Bliss D.E. 1983. Terrestrial adaptations. In: Bliss D.E., editor. *The Biology of Crustacea*. Academic Press. p. 271–334.
- Rambaut A., Drummond A.J., Xie D., Baele G., Suchard M.A. 2018. Posterior summarisation in Bayesian phylogenetics using Tracer 1.7. *Systematic Biology*. 67:901–904.
- Renner S.S., Grimm G.W., Kapli P., Denk T. 2016. Species relationships and divergence times in beeches: new insights from the inclusion of 53 young and old fossils in a birth–death clock model. *Philosophical Transactions of the Royal Society B: Biological Sciences*. 371:20150135.
- Revell L.J. 2012. phytools: an R package for phylogenetic comparative biology (and other things). *Methods in Ecology and Evolution*. 3:217–223.
- Revell L.J. 2014. Ancestral character estimation under the threshold model from quantitative genetics. *Evolution*. 68:743–759.
- Robin N., Bakel B.W.M. van, Hyžný M., Cincotta A., Garcia G., Charbonnier S., Godefroit P., Valentin X. 2019. The oldest freshwater crabs: claws on dinosaur bones. *Scientific Reports*. 9:20220.
- Robins C.M., Klompmaker A.A. 2019. Extreme diversity and parasitism of Late Jurassic squat lobsters (Decapoda: Galatheaidea) and the oldest records of porcellanids and galatheids. *Zoological Journal of the Linnean Society*. 187:1131–1154.
- Román-Palacios C., Moraga-López D., Wiens J.J. 2022. The origins of global biodiversity on land, sea and freshwater. *Ecology Letters*. 25:1376–1386.
- Ronquist F., Teslenko M., van der Mark P., Ayres D.L., Darling A., Höhna S., Larget B., Liu L., Suchard M.A., Huelsenbeck J.P. 2012. MrBayes 3.2: Efficient Bayesian Phylogenetic Inference and Model Choice Across a Large Model Space. *Systematic Biology*. 61:539–542.



- Sallan L., Friedman M., Sansom R.S., Bird C.M., Sansom I.J. 2018. The nearshore cradle of early vertebrate diversification. *Science*. 362:460–464.
- Scholtz G. 2020. *Eocarcinus praecursor* Withers, 1932 (Malacostraca, Decapoda, Meiura) is a stem group brachyuran. *Arthropod Structure & Development*. 59:100991.
- Scholtz G., Richter S. 1995. Phylogenetic systematics of the reptantian Decapoda (Crustacea, Malacostraca). *Zoological Journal of the Linnean Society*. 113:289–328.
- Schubart C.D., Cuesta J.A., Felder D.L. 2002. Glyptograpsidae, a New Brachyuran Family from Central America: Larval and Adult Morphology, and a Molecular Phylogeny of the Grapsoidea. *Journal of Crustacean Biology*. 22:28–44.
- Schubart C.D., Neigel J.E., Felder D.L. 2000. The use of the mitochondrial 16S rDNA gene for phylogenetics and biogeographic studies of Crustacea. *Crustacean Issues: The Biodiversity Crisis and Crustacea*. Boca Raton: CRC Press. p. 817–830.
- Simon C., Frati F., Beckenbach A., Crespi B., Liu H., Flook P. 1994. Evolution, Weighting, and Phylogenetic Utility of Mitochondrial Gene Sequences and a Compilation of Conserved Polymerase Chain Reaction Primers. *Annals of the Entomological Society of America*. 87:651–701.
- Song H., Buhay J.E., Whiting M.F., Crandall K.A. 2008. Many species in one: DNA barcoding overestimates the number of species when nuclear mitochondrial pseudogenes are coamplified. *Proc. Natl. Acad. Sci. U.S.A.* 105:13486–13491.
- Spears T., Abele L.G. 1998. Crustacean phylogeny inferred from 18S rDNA. In: Fortey R.A., Thomas R.H., editors. *Arthropod Relationships*. Dordrecht: Springer. p. 169–187.
- Stadler T. 2010. Sampling-through-time in birth–death trees. *Journal of Theoretical Biology*. 267:396–404.
- Stadler T., Kuhnert D., Bonhoeffer S., Drummond A.J. 2013. Birth-death skyline plot reveals temporal changes of epidemic spread in HIV and hepatitis C virus (HCV). *Proceedings of the National Academy of Sciences*. 110:228–233.
- von Sternberg R., Cumberlidge N. 2001. Notes on the position of the true freshwater crabs within the brachyrhynchan Eubrachyura (Crustacea: Decapoda: Brachyura). *Hydrobiologia*. 449:21–39.
- Sun S., Jiang W., Yuan Z., Sha Z. 2022. Mitogenomes Provide Insights Into the Evolution of Thoracotremata (Brachyura: Eubrachyura). *Front. Mar. Sci.* 9:848203.
- Tan M.H., Gan H.M., Lee Y.P., Bracken-Grissom H., Chan T.-Y., Miller A.D., Austin C.M. 2019. Comparative mitogenomics of the Decapoda reveals evolutionary heterogeneity in architecture and composition. *Scientific Reports*. 9:10756.
- Tang B.-P., Xin Z.-Z., Liu Y., Zhang D.-Z., Wang Z.-F., Zhang H.-B., Chai X.-Y., Zhou C.-L., Liu Q.-N. 2017. The complete mitochondrial genome of *Sesarmops sinensis* reveals gene rearrangements and phylogenetic relationships in Brachyura. *PLoS ONE*. 12:e0179800.
- Thurman C.L. 1984. Ecological Notes on Fiddler Crabs of South Texas, With Special Reference to *Uca Subcylindrica*. *Journal of Crustacean Biology*. 4:665–681.
- Timm L., Bracken-Grissom H.D. 2015. The forest for the trees: evaluating molecular phylogenies with an emphasis on higher-level Decapoda. *Journal of Crustacean Biology*. 35:577–592.
- Townsend J.P. 2007. Profiling Phylogenetic Informativeness. *Systematic Biology*. 56:222–231.
- Tsang C.T.T., Schubart C.D., Chu K.H., Ng P.K.L., Tsang L.M. 2022. Molecular phylogeny of Thoracotremata crabs (Decapoda, Brachyura): Toward adopting monophyletic superfamilies, invasion history into terrestrial habitats and multiple origins of symbiosis. *Molecular Phylogenetics and Evolution*. 177:107596.
- Tsang L.M., Chan T.-Y., Ah Yong S.T., Chu K.H. 2011. Hermit to King, or Hermit to All: Multiple Transitions to Crab-like Forms from Hermit Crab Ancestors. *Systematic Biology*. 60:616–629.
- Tsang L.M., Ma K.Y., Ah Yong S.T., Chan T.-Y., Chu K.H. 2008. Phylogeny of Decapoda using two nuclear protein-coding genes: Origin and evolution of the Reptantia. *Molecular Phylogenetics and Evolution*. 48:359–368.
- Tsang L.M., Schubart C.D., Ah Yong S.T., Lai J.C.Y., Au E.Y.C., Chan T.-Y., Ng P.K.L., Chu K.H. 2014. Evolutionary History of True Crabs (Crustacea: Decapoda: Brachyura) and the Origin of Freshwater Crabs. *Molecular Biology and Evolution*. 31:1173–1187.
- Wang Q., Wang J., Wu Q., Xu X., Wang P., Wang Z. 2021. Insights into the evolution of Brachyura (Crustacea: Decapoda) from mitochondrial sequences and gene order rearrangements. *International Journal of Biological Macromolecules*. 170:717–727.
- Watson-Zink V.M. 2021. Making the grade: Physiological adaptations to terrestrial environments in decapod crabs. *Arthropod Structure & Development*. 64:101089.

- Whiting M.F. 2002. Mecoptera is paraphyletic: multiple genes and phylogeny of Mecoptera and Siphonaptera. *Zoologica Scripta*. 31:93–104.
- Whiting M.F., Carpenter J.C., Wheeler Q.D., Wheeler W.C. 1997. The Strepsiptera problem: Phylogeny of the holometabolous insect orders inferred from 18S and 28S ribosomal DNA sequences and morphology. *Systematic Biology*. 46:1–68.
- Windsor A.M., Felder D.L. 2014. Molecular phylogenetics and taxonomic reanalysis of the family Mithracidae MacLeay (Decapoda : Brachyura : Majoidea). *Invertebrate Systematics*. 28:145–173.
- Wolfe J.M., Breinholt J.W., Crandall K.A., Lemmon A.R., Moriarty Lemmon E., Timm L.E., Siddall M.E., Bracken-Grissom H.D. 2019. A phylogenomic framework, evolutionary timeline, and genomic resources for comparative studies of decapod crustaceans. *Proceedings of the Royal Society B: Biological Sciences*. 286:20190079.
- Wolfe J.M., Daley A.C., Legg D.A., Edgecombe G.D. 2016. Fossil calibrations for the arthropod Tree of Life. *Earth-Science Reviews*. 160:43–110.
- Wolfe J.M., Luque J., Bracken-Grissom H.D. 2021. How to become a crab: Phenotypic constraints on a recurring body plan. *BioEssays*. 43:2100020.
- WoRMS. 2021. Brachyura. Accessed at: <https://www.marinespecies.org/aphia.php?p=taxdetails&id=106673> on 06-08-2021.
- WoRMS. 2022. Brachyura. Accessed at: <https://www.marinespecies.org/aphia.php?p=taxdetails&id=106673> on 12-08-2022.
- Wright A.M., Bapst D.W., Barido-Sottani J., Warnock R.C.M. 2022. Integrating Fossil Observations Into Phylogenetics Using the Fossilized Birth–Death Model. *Annu. Rev. Ecol. Evol. Syst.* 53:251–273.
- Yeo D.C.J., Ng P.K.L., Cumberlidge N., Magalhães C., Daniels S.R., Campos M.R. 2008. Global diversity of crabs (Crustacea: Decapoda: Brachyura) in freshwater. *Hydrobiologia*. 595:275–286.
- Young A.M., Elliott J.A. 2020. Life History and Population Dynamics of Green Crabs (*Carcinus maenas*). *Fishes*. 5:44.
- Zhang Y., Gong L., Lu X., Miao Z., Jiang L., Liu B., Liu L., Li P., Zhang X., Lü Z. 2022. Comparative mitochondrial genome analysis of Varunidae and its phylogenetic implications. *Acta Oceanol. Sin.* 41:119–131.
- Zhang Z., Capinha C., Weterings R., McLay C.L., Xi D., Lü H., Yu L. 2019. Ensemble forecasting of the global potential distribution of the invasive Chinese mitten crab, *Eriocheir sinensis*. *Hydrobiologia*. 826:367–377.
- Zhou X., Shen X.-X., Hittinger C.T., Rokas A. 2018. Evaluating Fast Maximum Likelihood-Based Phylogenetic Programs Using Empirical Phylogenomic Data Sets. *Molecular Biology and Evolution*. 35:486–503.

**Figure 1.** Representative brachyurans displaying different lifestyles and grades of terrestriality. (A-E) Fully marine lifestyle, grade 0; (F-J) direct marine transition pathway, grades 1-5 bottom to top; (K-O) indirect freshwater transition pathway, grades 1-5 bottom to top. (A) Portunidae: *Portunus sayi* (Bermuda); (B) Calappidae: *Calappa calappa* (Kwajalein Atoll, Marshall Islands); (C) Epialtidae: *Cyclocoeloma tuberculatum* (Anilao, Philippines); (D) Raninidae: *Ranina ranina* (Oahu, Hawaii, USA); (E) Homolidae: *Paromola cuvieri* (Gorringe Ridge, Portugal); (F) Gecarcinidae: *Gecarcoidea natalis* (Christmas Island, Australia); (G) Gecarcinidae: *Cardisoma guanhumi* (Fort Lauderdale, Florida, USA); (H) Ocypodidae: *Uca heteropleura* (Pacific coast, Panama); (I) Grapsidae: *Leptograpsus variegatus* (Tasmania, Australia); (J) Eriphiidae: *Eriphia sebana* (Heron Island, Queensland, Australia); (K) Sesarmidae: *Geosesarma dennerle* (aquarium specimen); (L) Deckeniidae: *Madagapotamon humberti* (Montagne de Français Reserve, Madagascar); (M) Gecarcinucidae: *Ghatiana botti* (Sindhudurg, India); (N) Pseudothelphusidae indet. (Santander, Colombia); (O) Hymenosomatidae: *Hymenosoma orbiculare* (Langebaan Lagoon, South Africa). Photo credits: (A) Jessica Riederer; (B, C) Jeanette and Scott Johnson; (D) John Hoover; (E) © OCEANA; (F) John Tann, license CC-BY; (G) Tom Friedel, license CC-BY 3.0; (H) Kecia Kerr and Javier Luque; (I) Joanna Wolfe; (J,N) Javier Luque; (K) Henry Wong; (L) Sara Ruane; (M) Tejas Thackeray; (O) Charles Griffiths.

**Figure 2.** Summary of phylogeny and divergence time estimates for Brachyura. Posterior ages were estimated in BEAST2 using a fixed topology resulting from the concatenated ML analysis in IQ-TREE, 36 vetted node calibrations, a birth-death tree prior, and relaxed lognormal clock model. Shaded circles at nodes represent ultrafast bootstraps. Pie slices are colored by superfamily, with the outermost ring colored by taxonomic section. Line drawings, one representative per superfamily (numbers corresponding to taxa in Table S5), by Javier Luque and Harrison Mancke.

**Figure 3.** Sensitivity of divergence time estimates to inference strategy plotted with *chronospace*, with outgroup taxa removed from these analyses. (A) Between-group principal component analysis (bgPCA) separating chronograms by calibration strategy and (B) by clock model (note: analyses with the random local clock model did not converge, so individual chains are sampled here with 50% burnin). (C) Change in branch lengths along the major bgPCA axis, discriminating based on calibration strategy. Negative extreme above, positive extreme below.

**Figure 4.** Composite of ancestral state reconstructions for the two transition pathways under best-fitting OU models in *ancThresh*, with fully marine clades (all families that are not labeled) reduced for clarity and outgroups removed. Legend for grades and colors representing each pathway at bottom left: fully marine crabs (grade 0), lower intertidal and estuaries (grade 1), upper intertidal and freshwater (grade 2), beaches and riverbanks (grade 3), and coastal forests and jungles (grades 4-5). Pies at nodes represent the estimated ancestral state with the outer ring indicating the pathway (at some nodes, both pathways are shown; when node is inferred marine, none are shown). Tip codings are based on estimates by family (Table S4), with the collapsed clades showing the color that represents the largest slice of their prior probabilities (split in the case of equal probabilities for two grades). For clades that have a small number of taxa in a grade from the opposite pathway, a small triangle is added. Line drawings at right (numbers corresponding to taxa in Table S5), by Javier Luque and Harrison Mancke.

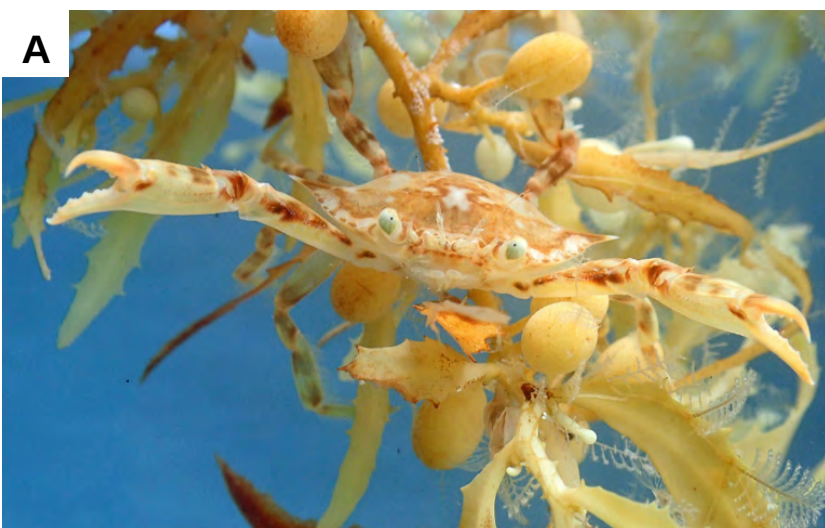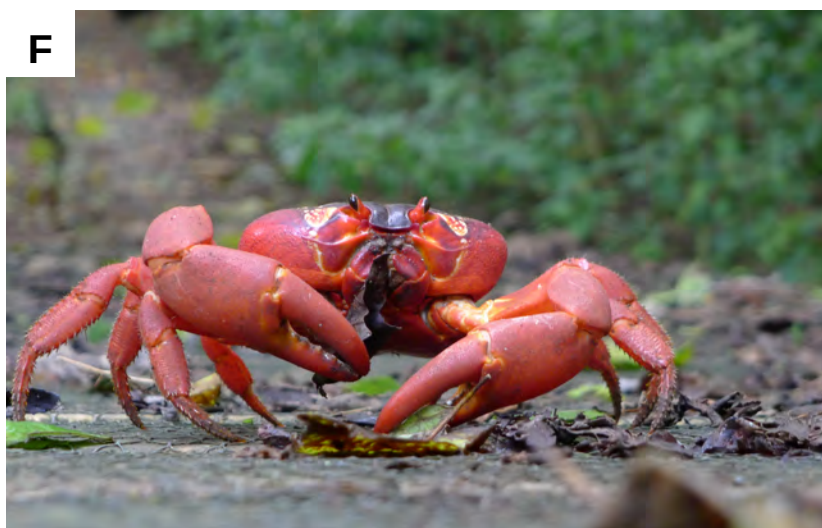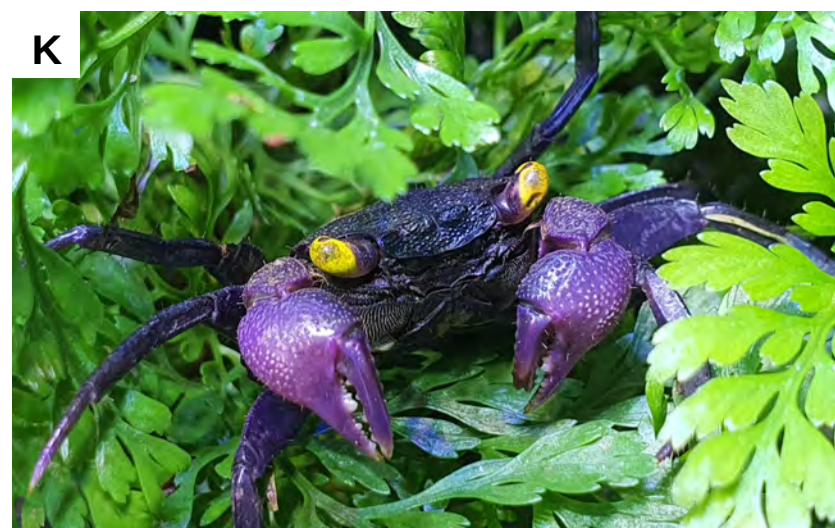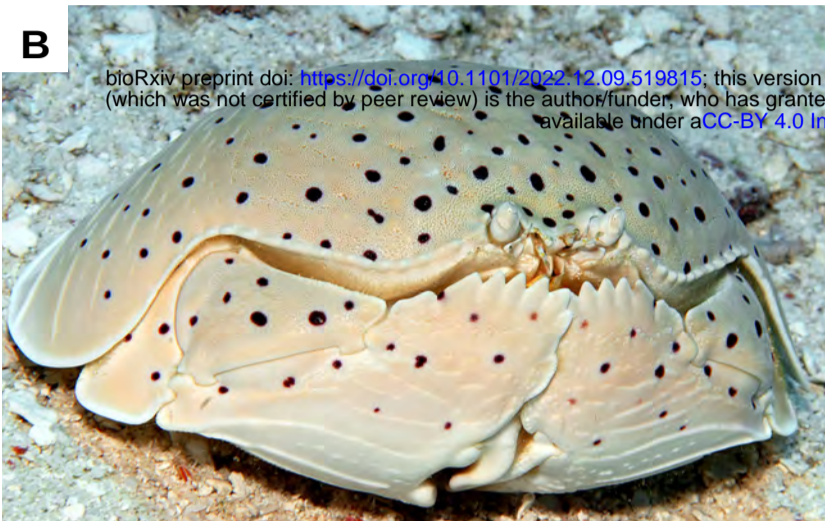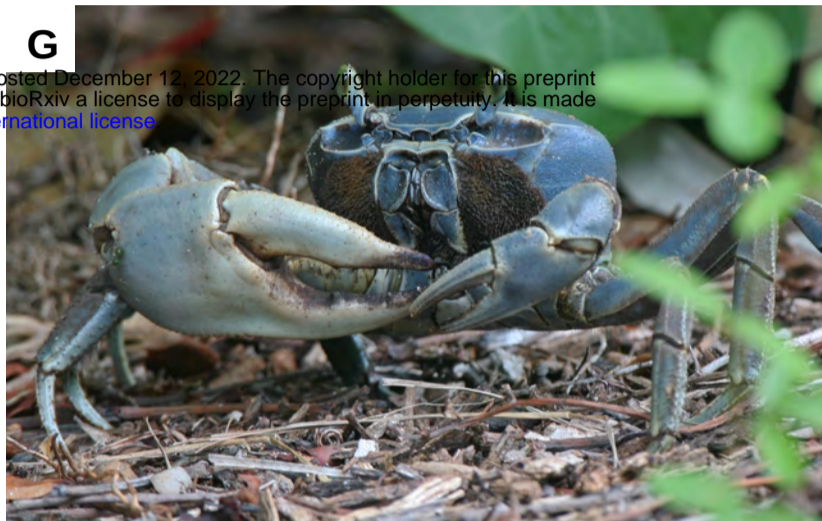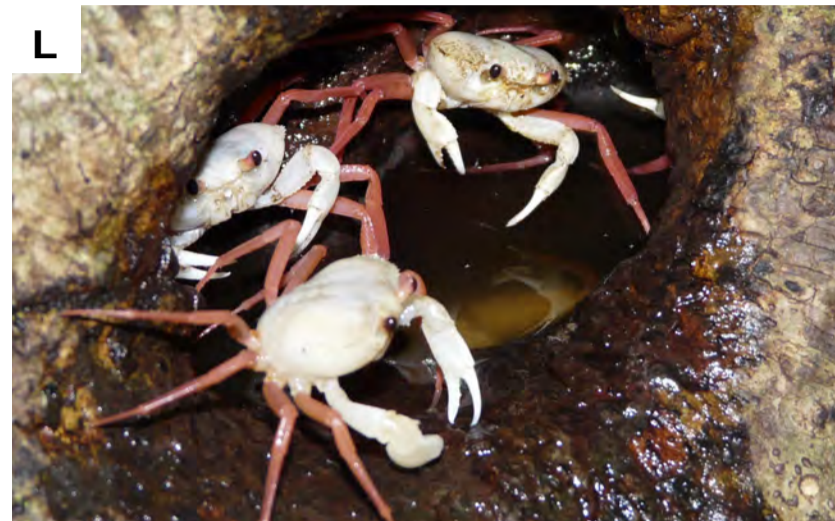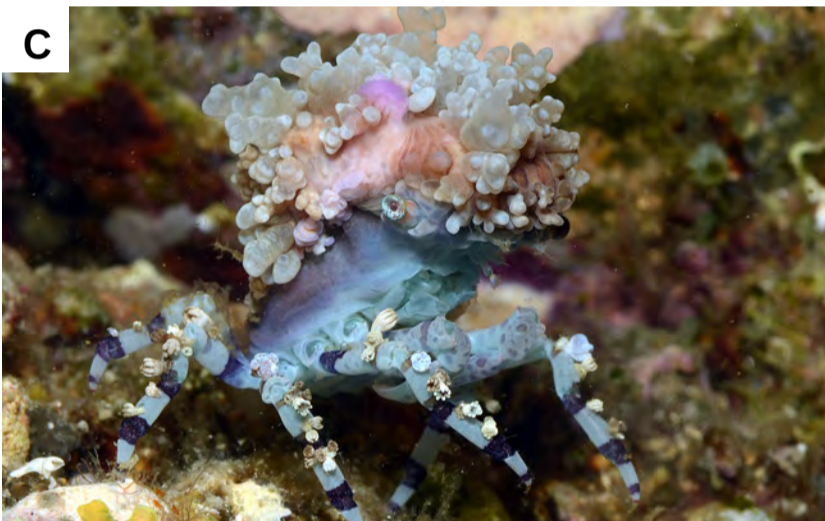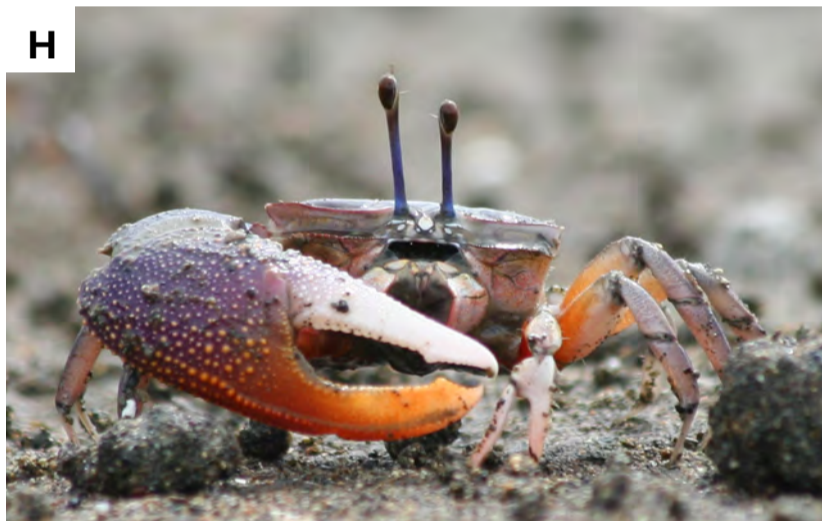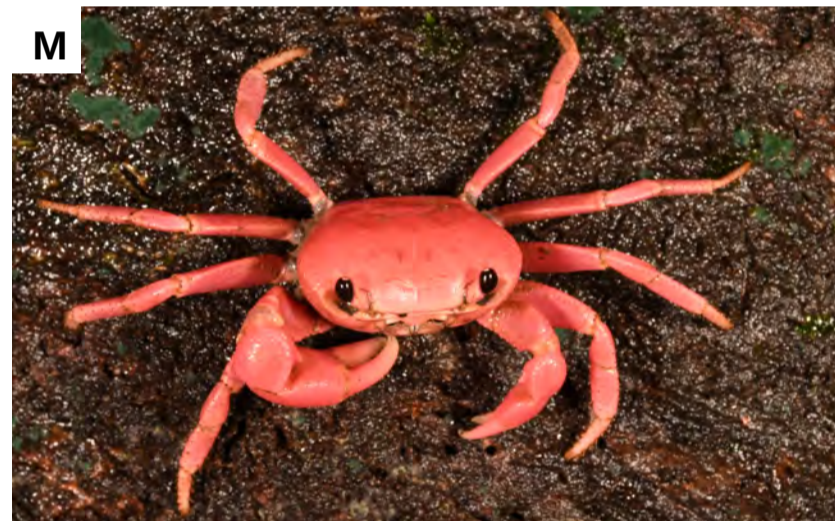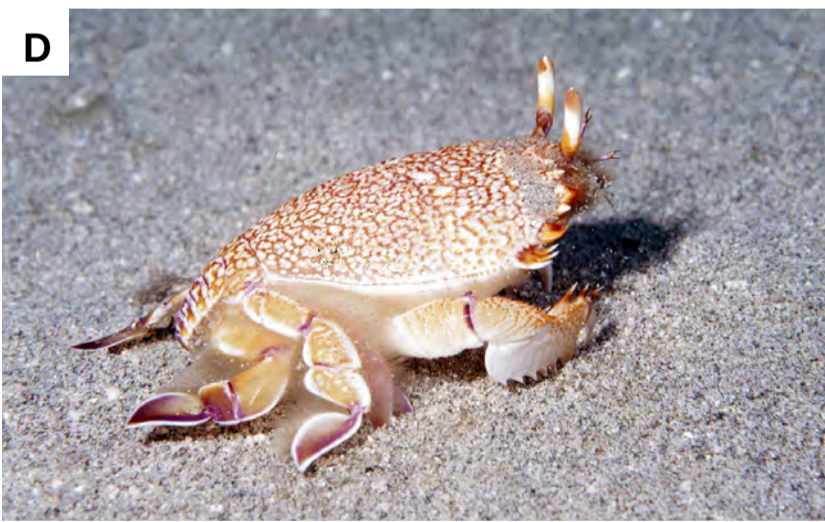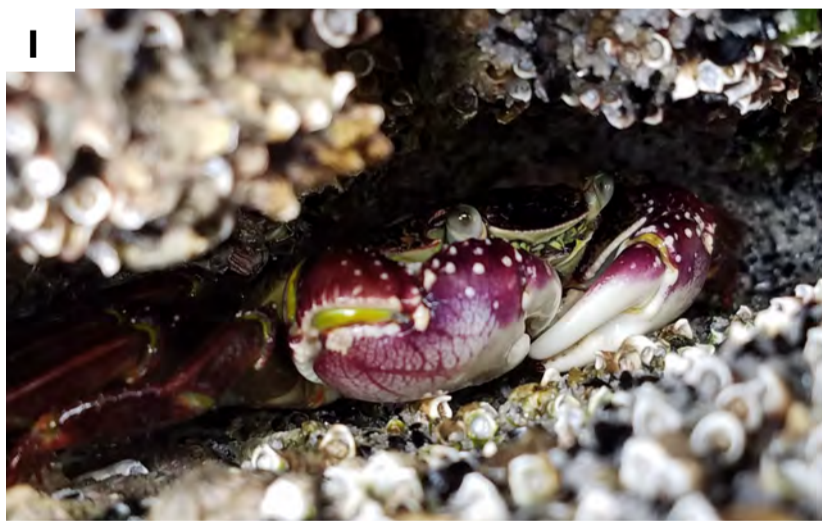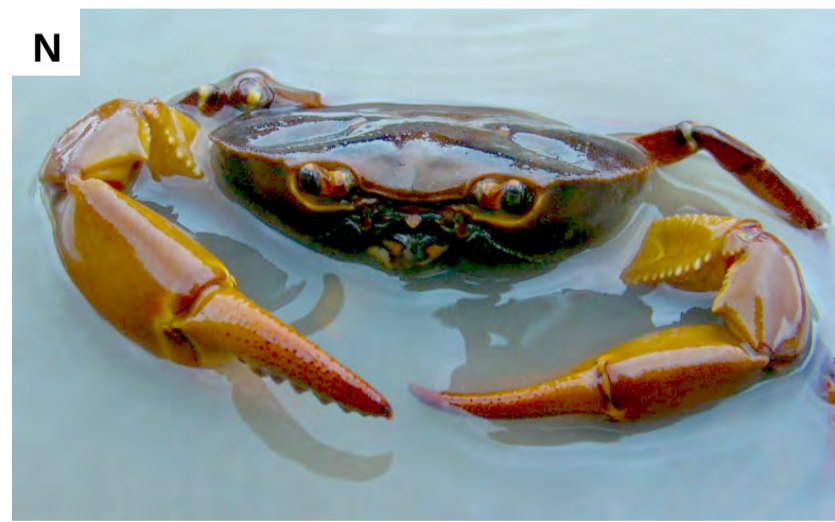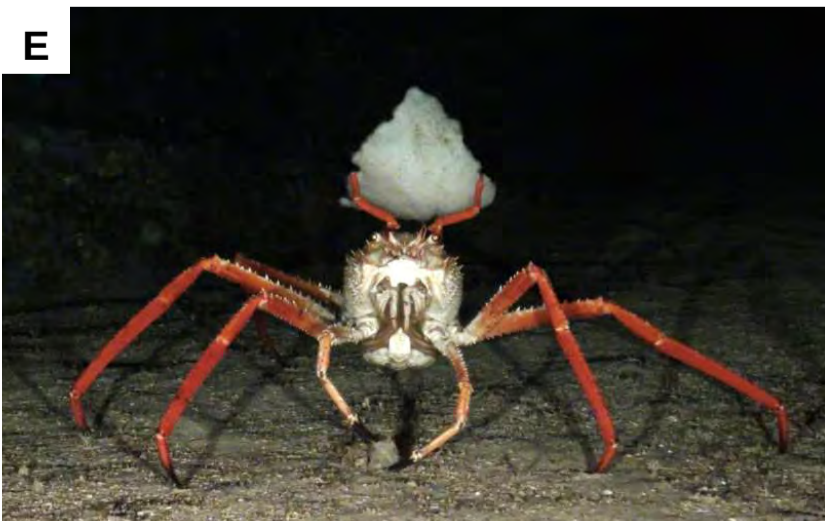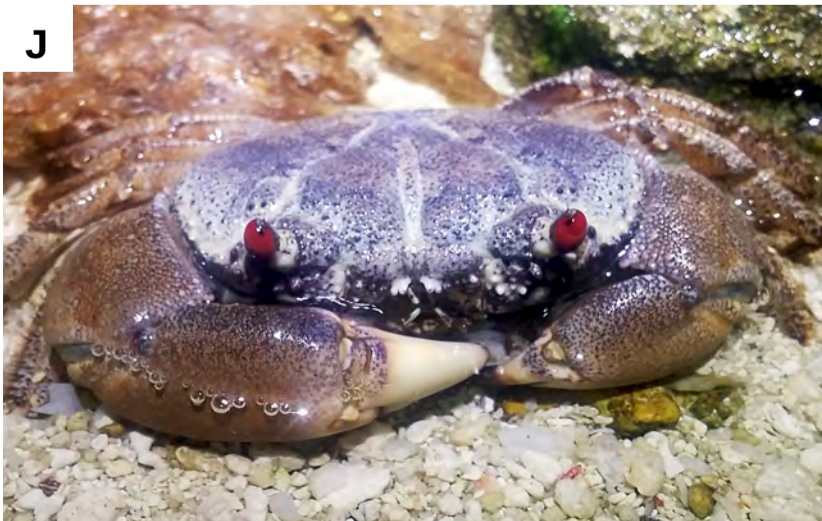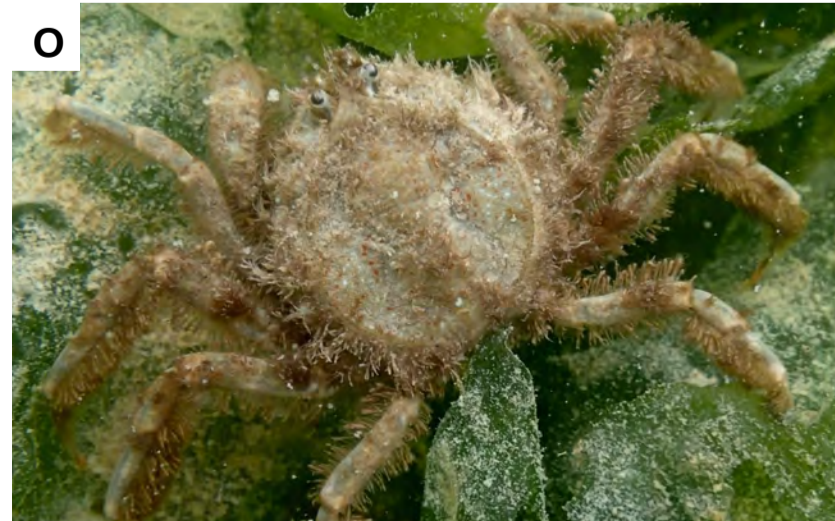



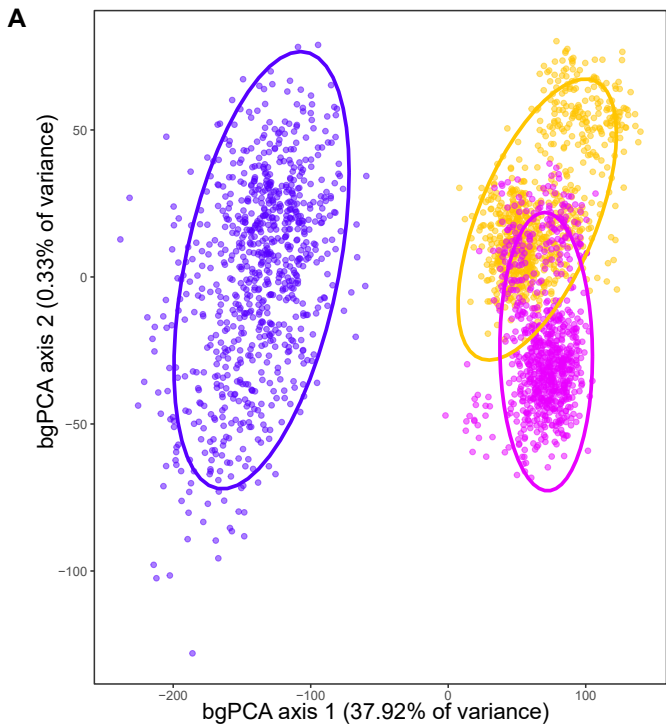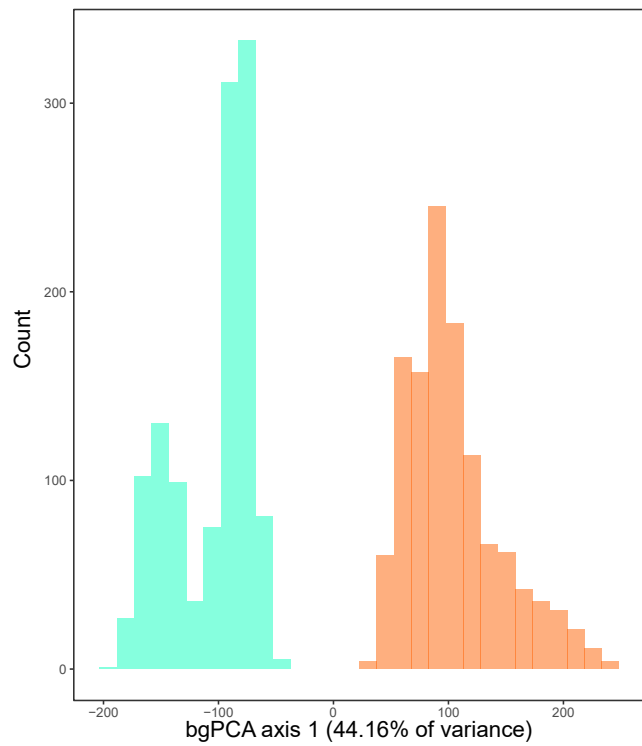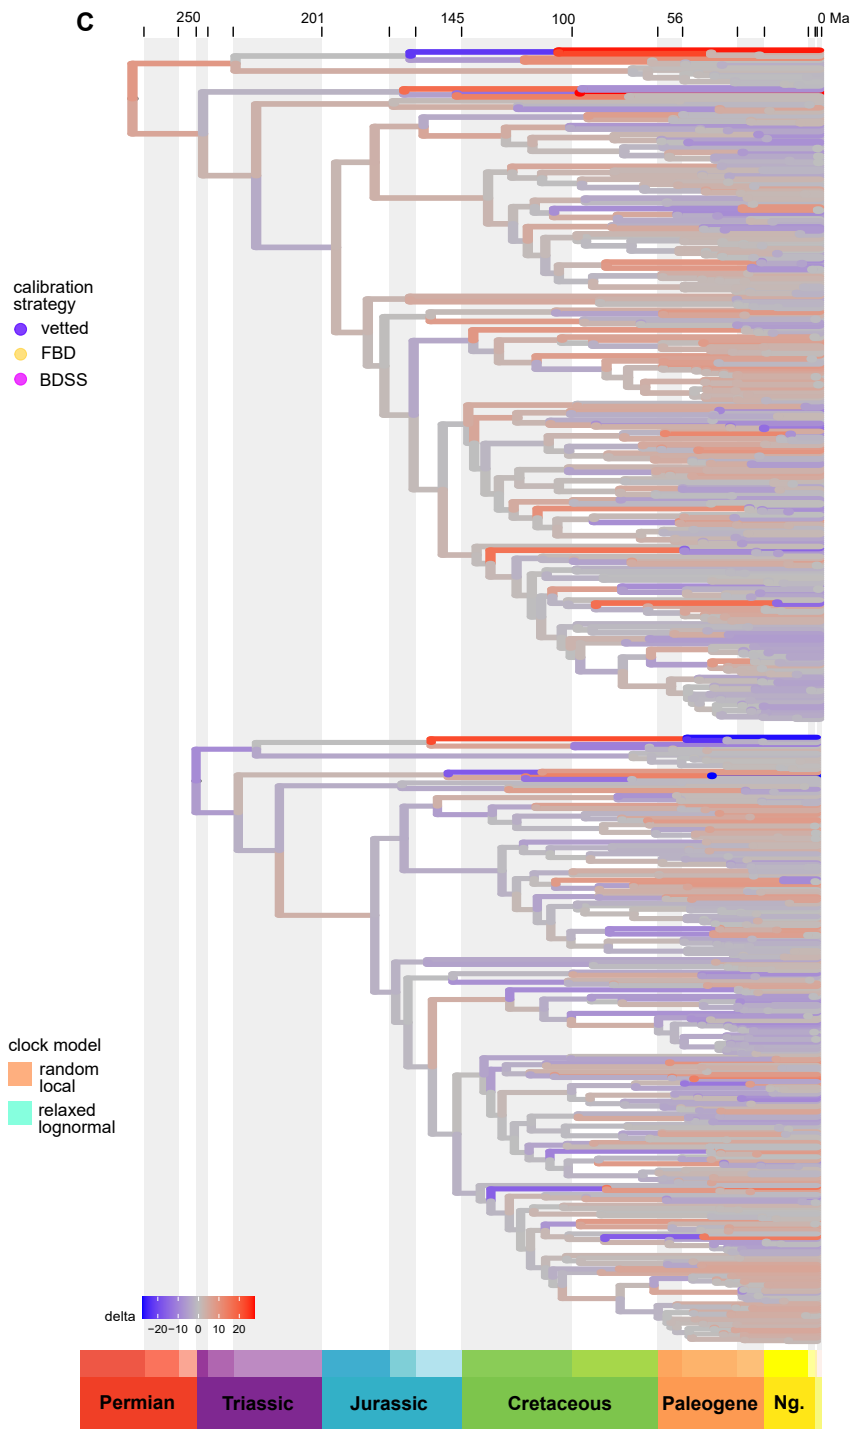

250 201 145 100 56 0 Ma

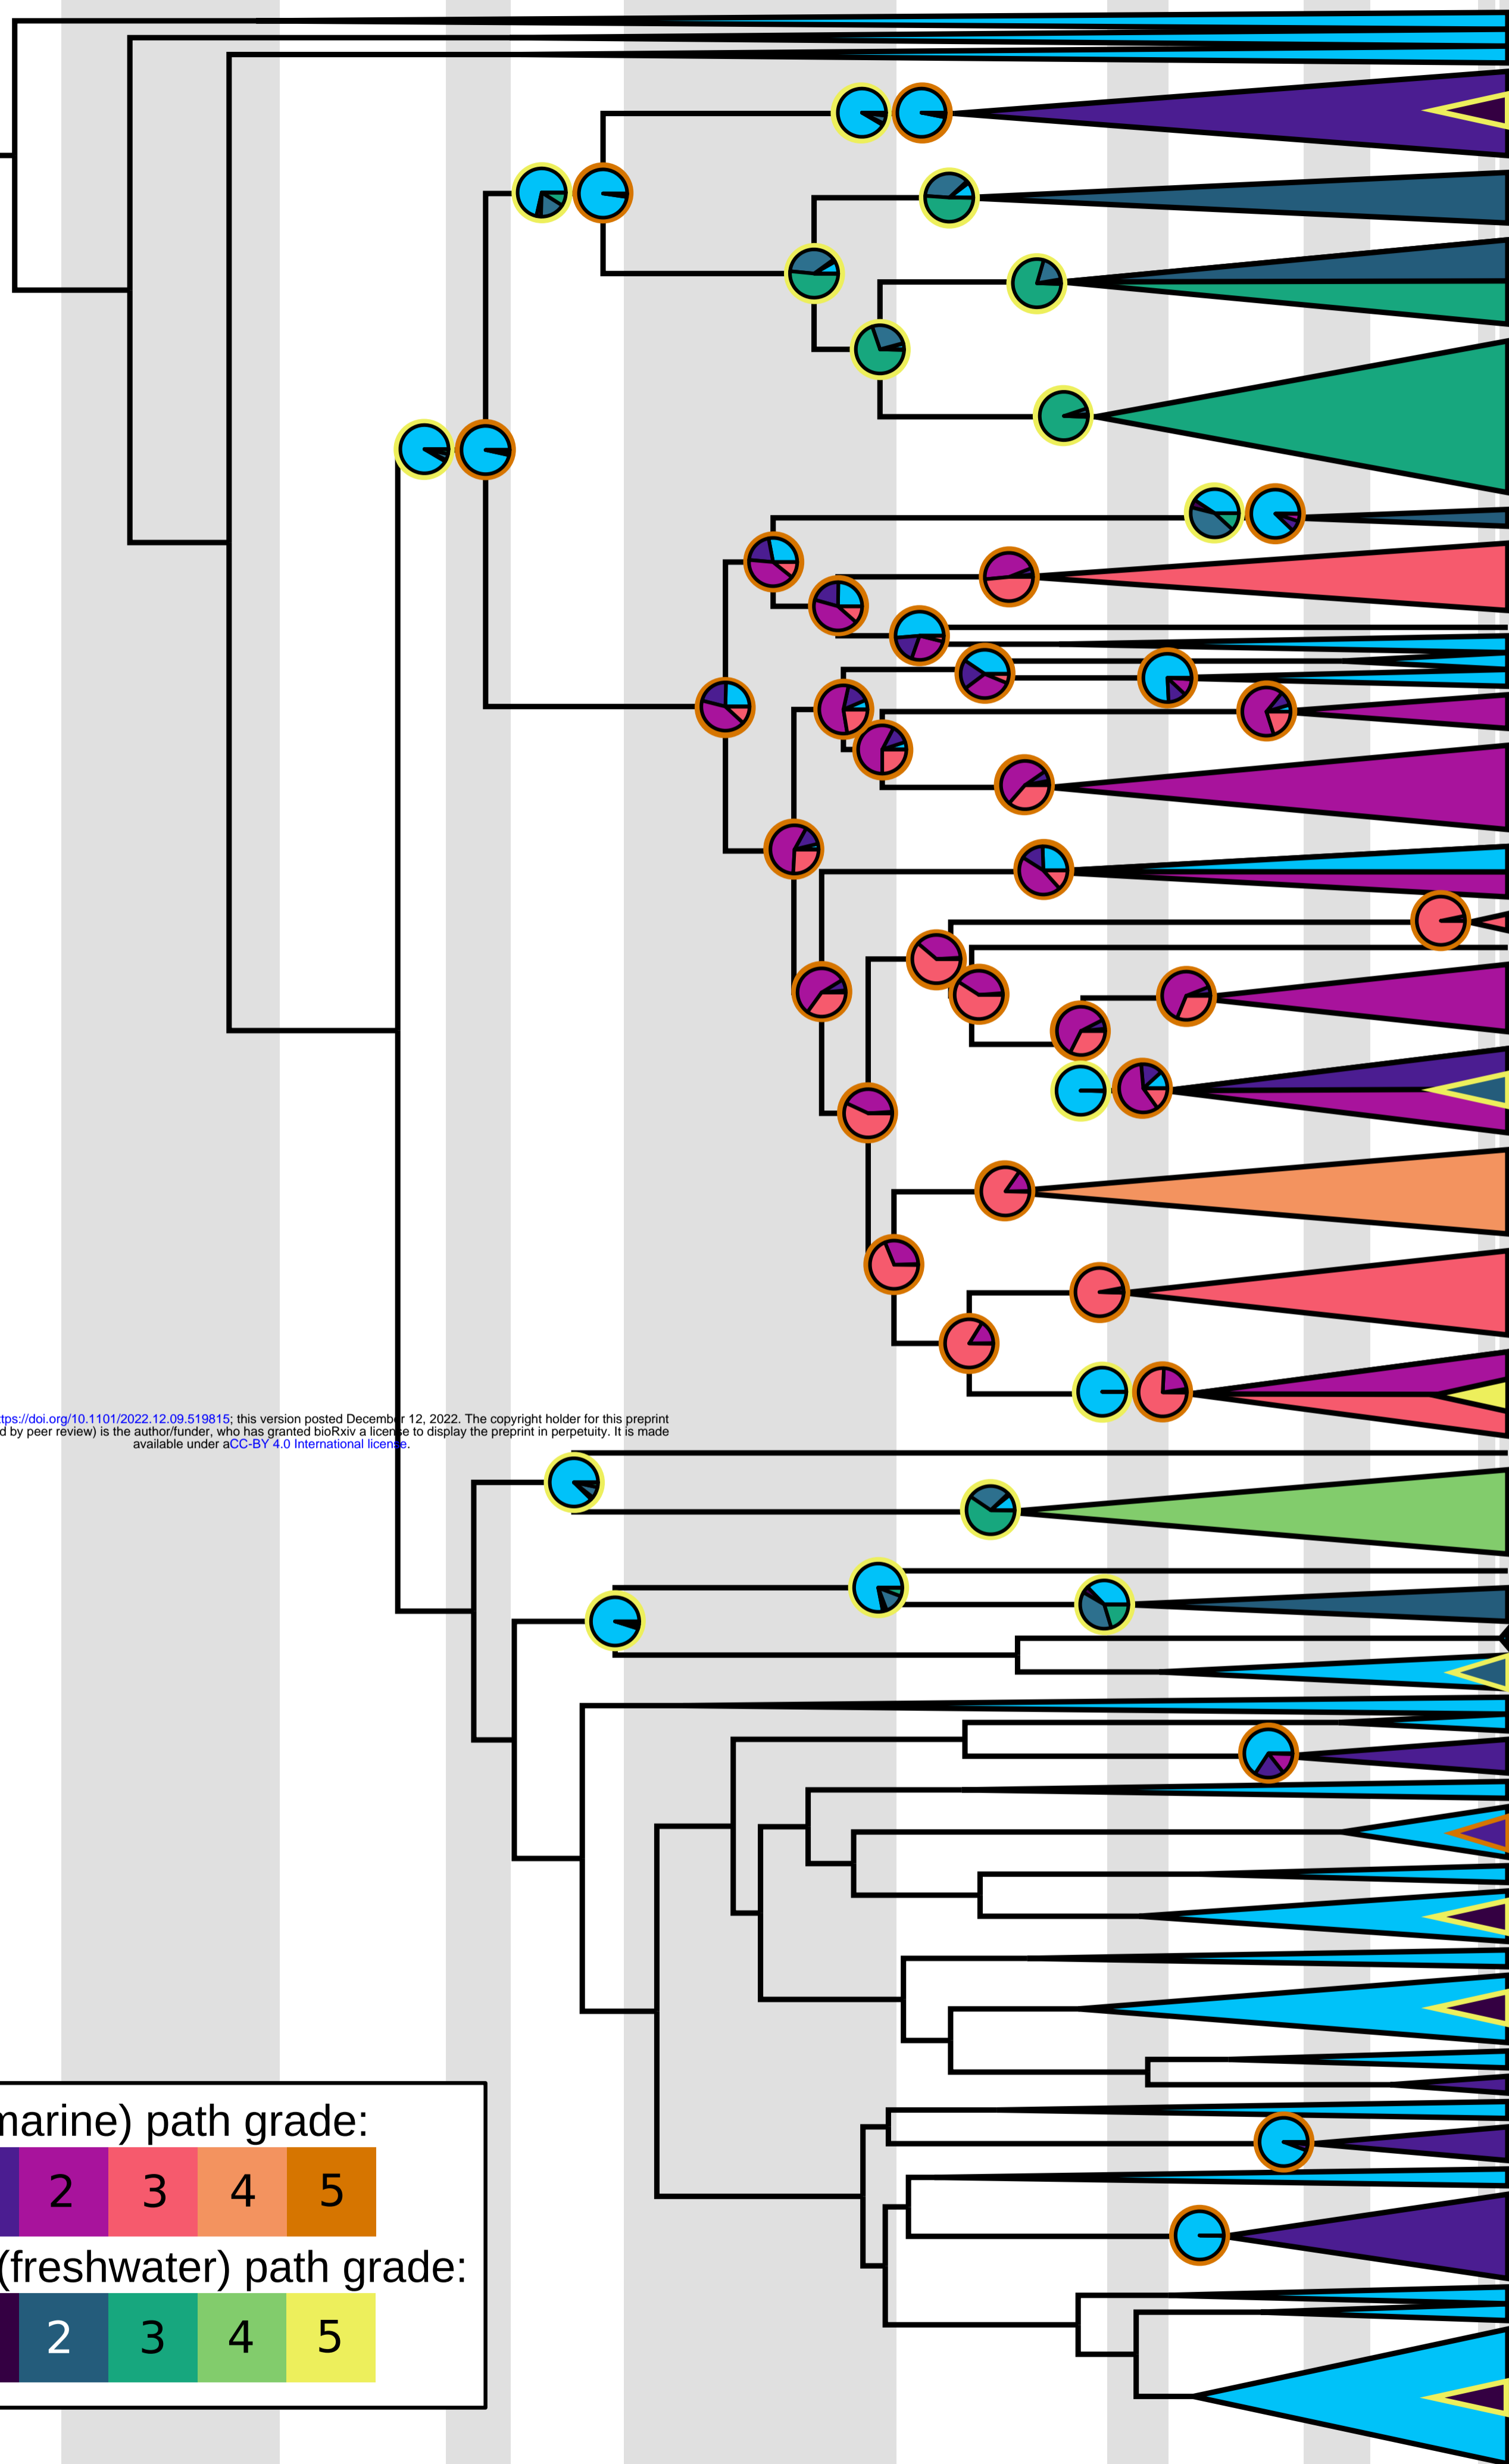

Hymenosomatidae  
 Deckeniidae  
 Potamonautidae  
 Potamidae  
 Gecarcinucidae  
 Glyptograpsidae  
 Ocypodidae  
 Percnidae  
 Grapsidae  
 Plagusiidae  
 Mictyridae  
 Heloeciidae  
 Macrophthalmidae  
 Varunidae  
 Gecarcinidae  
 Dotillidae  
 Sesarmidae  
 Epiloboceridae  
 Pseudothelphusidae  
 Trichodactylidae  
 Chasmocarcinidae  
 Menippidae  
 Cancridae  
 Dorippidae  
 Portunidae  
 Carcinidae  
 Eriphiidae  
 Oziidae  
 Panopeidae

**Thoracotremata**

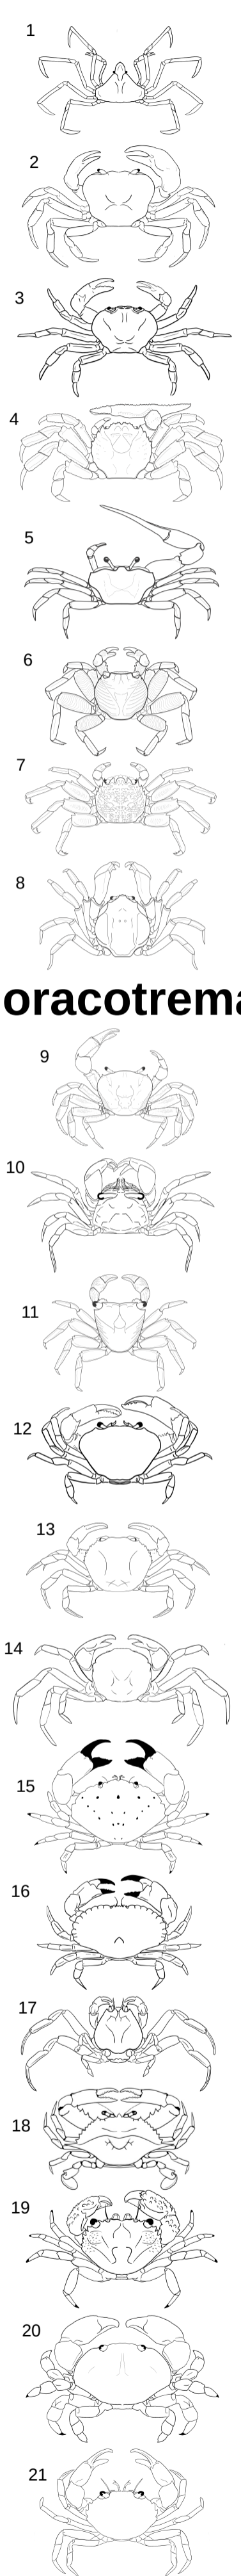

Direct (marine) path grade:  
 0 1 2 3 4 5  
 Indirect (freshwater) path grade:  
 0 1 2 3 4 5

bioRxiv preprint doi: <https://doi.org/10.1101/2022.12.09.519815>; this version posted December 12, 2022. The copyright holder for this preprint (which was not certified by peer review) is the author/funder, who has granted bioRxiv a license to display the preprint in perpetuity. It is made available under aCC-BY 4.0 International license.

Triassic Jurassic Cretaceous Paleogene Ng.

## Supplemental Information:

**Text S1.** Fossil node calibrations with references. The topology defining the nodes is the concatenated ML tree.

**Text S2.** References associated with natural history codings in Table S3.

**Figure S1.** Gene tree for 12S. Nodes are unlabeled as gene trees were calculated as part of the concordance factor analysis (labels visualized in Figure S11). Branches colored by superfamily, as for Figure 2.

**Figure S2.** Gene tree for 16S. Branches colored by superfamily, as for Figure 2.

**Figure S3.** Gene tree for 18S. Branches colored by superfamily, as for Figure 2.

**Figure S4.** Gene tree for 28S. Branches colored by superfamily, as for Figure 2.

**Figure S5.** Gene tree for AK. Branches colored by superfamily, as for Figure 2.

**Figure S6.** Gene tree for enolase. Branches colored by superfamily, as for Figure 2.

**Figure S7.** Gene tree for GADPH. Branches colored by superfamily, as for Figure 2.

**Figure S8.** Gene tree for H3. Branches colored by superfamily, as for Figure 2.

**Figure S9.** Gene tree for NaK. Branches colored by superfamily, as for Figure 2.

**Figure S10.** Gene tree for PEPCK. Branches colored by superfamily, as for Figure 2.

**Figure S11.** Full phylogenetic hypothesis for Brachyura based on the topology from the ML concatenated analysis. Values at nodes represent ultrafast bootstraps / gene concordance factors (gCF) by partition / updated site concordance factors (sCF). Branches colored by superfamily, as for Figure 2.

**Figure S12.** Full phylogenetic hypothesis for Brachyura based on the topology from the Bayesian concatenated analysis. Values at nodes represent posterior probabilities. Branches colored by superfamily, as for Figure 2.

**Figure S13.** Plots of concordance factors versus UF bootstrap values for the ML concatenated tree. **(A)** Gene concordance factors by partition. **(B)** Updated site concordance factors.

**Figure S14.** Results of phylogenetic informativeness profiling for 10 Sanger genes.

**Figure S15.** Sensitivity of divergence time estimates to inference strategy plotted with *chronospace*, with outgroup taxa removed from these analyses. This plot shows between--group principal component analysis (bgPCA) separating chronograms by calibration strategy, for only relaxed lognormal clock models (all fully converged).

**Figure S16.** Full divergence time estimates for Brachyura as depicted in Figure 2. Posterior ages were estimated in BEAST2 using 36 vetted node calibrations (represented by numbered circles following the order in Text S1) and the topology fixed from Figure S11, a birth-death tree prior, and relaxed lognormal clock model. Horizontal shaded bars represent 95% HPD intervals. Branches colored by superfamily, as for Figure 2.

**Figure S17.** Full divergence time estimates for Brachyura using the FBD. Posterior ages were estimated in BEAST2 using 328 calibrations from PBDB added as rogues to the topology fixed from Figure S11, an FBD tree prior, and relaxed lognormal clock model. Horizontal shaded bars represent 95% HPD intervals. Branches colored by superfamily, as for Figure 2.

**Figure S18.** Full divergence time estimates for Brachyura using BDSS. Posterior ages were estimated in BEAST2 using 328 calibrations from PBDB added as rogues to the topology fixed from Figure S11, a BDSS tree prior, and relaxed lognormal clock model. Horizontal shaded bars represent 95% HPD intervals. Branches colored by superfamily, as for Figure 2.



**Figure S19.** Comparison of posterior probability distributions for divergence time analyses under different calibration strategies in BEAST2, and the same analyses under the marginal prior (removing sequence data). The posterior analyses are shaded; marginal priors are superimposed on the same axes with a heavy line of the same color. (A) Root; (B) 20 most sensitive nodes, calculated based on Figure 3A.

**Figure S20.** Summary of 500 stochastic character maps coding tips in a simplified form as: fully marine, terrestrial (through direct marine pathway), and freshwater, under the best-fitting all rates different (ARD) model. These codings are based on the transition pathways scored from the literature supported data in Table S3.

**Figure S21.** Ancestral state reconstruction for the sequence from fully marine to terrestrial through direct marine pathway, under the best-fitting OU model in *ancThresh*. The tip codings are based on estimates by family as coded in Table S4, with their prior probabilities visualized as small pies at tips.

**Figure S22.** Posterior density of liabilities estimated in *ancThresh*, indicating the thresholds of change required to shift character states. As in Sallan et al. (2018), the threshold for exiting marine (grade 0) is held at 0, and values for exiting grade 5 are infinity as there are no subsequent states to transition into. (A) Sequence from fully marine to terrestrial through direct marine pathway, under OU model, and (B) with grade 0 removed for clarity. (C) Sequence from fully marine to terrestrial through indirect freshwater pathway, under OU model, and (D) with grades 0-1 removed for clarity.

**Figure S23.** Ancestral state reconstruction for the sequence from fully marine to terrestrial through indirect freshwater pathway, under the best-fitting OU model in *ancThresh*. The tip codings are based on estimates by family as coded in Table S4, with their prior probabilities visualized as small pies at tips.

**Figure S24.** Ancestral state reconstructions for transitions between pathways for subclade Hymenosomatidae, under the OU model in *ancThresh*. (A) From ancestrally freshwater to direct pathway. In this case, state 0 reflects fully marine plus terrestrial prior probabilities. (B) From terrestrial through the direct pathway, to freshwater. Posterior density of liabilities from (C) ancestrally freshwater to direct pathway and (D) terrestrial through the direct pathway, to freshwater.

**Figure S25.** Ancestral state reconstructions for transitions between pathways for subclade Sesarmidae, under the OU model in *ancThresh*. (A) From ancestrally terrestrial to indirect freshwater pathway. In this case, state 0 reflects fully marine plus terrestrial prior probabilities. (B) From freshwater through the indirect pathway, to terrestrial. Posterior density of liabilities from (C) ancestrally terrestrial to indirect freshwater pathway and (D) freshwater through the indirect pathway, to terrestrial.

**Table S1.** Sample information for new and previous sequence data.

**Table S2.** Fossil node calibrations with details following Wolfe et al. (2016, 2019). The topology defining the nodes is the concatenated ML tree.

**Table S3.** Discrete coded terrestriality grades for all sequenced taxa, with evidence for each trait supported by literature. Transition pathway 0 represents fully marine lifestyle, 1 represents transition to terrestriality through marine pathway, 2 represents transition through freshwater pathway. Grades as in Watson-Zink (2021).

**Table S4.** Prior probabilities of terrestriality grades estimated for each family, accounting for states from taxa that are not sequenced, based on WoRMS. Transition pathway 0 represents fully marine lifestyle, 1 represents transition to terrestriality through marine pathway, 2 represents transition through freshwater pathway. Grades as in Watson-Zink (2021).

**Table S5.** Taxonomic key for line drawings in Figures 2 and 4.

**Table S6.** Model parameters estimated by *ancThresh*. Means reported for best-fitting model only (or OU model only for subclades), after excluding 20% burnin. As in Sallan et al. (2018), the threshold for exiting marine (grade 0) is held at 0, and values for exiting grade 5 are infinity as there are no subsequent states to transition into.

## Text S1. Fossil Calibrations

| Placement | Superfamily          | Family                   | Genus & species                                                                         | Oldest fossil occurrence reported in:           |
|-----------|----------------------|--------------------------|-----------------------------------------------------------------------------------------|-------------------------------------------------|
| Crown     | Galattheoidea        | Porcellanidae            | <i>Vibrissalana jurassica</i> Robins and Klompmaker, 2019                               | Robins and Klompmaker (2019)                    |
| Crown     | Dromioidea           | Dromiidae                | <i>Dromiopsis gigas</i> Forir, 1887                                                     | Forir (1887)                                    |
| Crown     | Dromioidea           | Dynomenidae              | <i>Graptocarcinus muiri</i> Stenzel, 1944                                               | Stenzel (1944)                                  |
| Stem      | Homoloidea           | Homolidae                | <i>Doerflesia omata</i> Feldmann and Schweitzer, 2009                                   | Feldmann and Schweitzer (2009)                  |
| Stem      | Palaeocorystoidea    | Palaeocorystidae         | <i>Joeranina kerri</i> Luque et al. 2012                                                | Luque et al. (2012)                             |
| Crown     | Raninoidea           | Lyreididae               | <i>Marylyreidus punctatus</i> (Rathbun, 1935) (as <i>Notopocorystes</i> )               | Rathbun (1935)                                  |
| Crown     | Cyclodorippoidea     | Cymonomidae              | <i>Cymonomus primitivus</i> Müller and Collins, 1991                                    | Müller and Collins (1991)                       |
| Crown     | Potamoidea           | Potamidae                | <i>Alontecarcinus buratoi</i> De Angeli and Caporiondo, 2019                            | De Angeli and Caporiondo (2019)                 |
| Crown     | Ocypodoidea          | Ocypodidae               | <i>Uca maracoani</i> (Latreille, 1802)                                                  | Brito (1972) (as <i>Uca antiqua maracoani</i> ) |
| Crown     | Pinnotheroidea       | Pinnotheridae            | <i>Pinnixa</i> sp.                                                                      | Luque et al. (2017)                             |
| Crown     | Grapsoidea           | Percnidae                | <i>Percnon santurbanensis</i> Ceccon and De Angeli, 2019                                | Ceccon and De Angeli (2019)                     |
| Crown     | Grapsoidea           | Grapsidae                | <i>Metopograpsus badenis</i> Müller, 2006                                               | Müller (2006)                                   |
| Crown     | Grapsoidea           | Varunidae                | <i>Brachynotus corallinus</i> Beschin, Busulini, De Angeli & Tessier, 2007              | Beschin et al. (2007)                           |
| Crown     | Grapsoidea           | Gecarcinidae             | <i>Cardisoma guanhumi</i> Latreille, in Latreille, Le Peletier, Serville & Guérin, 1828 | Collins and Donovan (1998)                      |
| Crown     | Grapsoidea           | Sesarmidae               | indet.                                                                                  | Serrano-Sánchez et al. (2016)                   |
| Crown     | Pseudothelphusioidea | Pseudothelphusidae       | indet.                                                                                  | Luque et al. (2019)                             |
| Crown     | Trichodactyloidea    | Trichodactylidae         | indet.                                                                                  | Klaus et al. (2017)                             |
| Crown     | Majoidea             | Mithracidae              | <i>Micippa antiqua</i> Beschin, De Angeli, and Checchi, 2001                            | Beschin et al. (2001)                           |
| Stem      | Portunoidea          | Eogeryonidae             | <i>Eogeryon elegius</i> Ossó, 2016                                                      | Ossó (2016)                                     |
| Crown     | Portunoidea          | Geryonidae               | <i>Chaceon helmstedtense</i> (Bachmayer and Mundlos, 1968) (as <i>Coeloma</i> ?)        | Bachmayer and Mundlos (1968)                    |
| Crown     | Portunoidea          | Portunidae: Thalamitinae | <i>Lessinithalamita gioiae</i> De Angeli and Ceccon, 2015                               | De Angeli and Ceccon (2015)                     |
| Crown     | Portunoidea          | Polybiidae               | <i>Liocarcinus heintzi</i> Schweitzer and Feldmann, 2010                                | Schweitzer and Feldmann (2010)                  |
| Crown     | Parthenopoidea       | Parthenopidae            | <i>Aragolambrus collinsi</i> Ferratges, Zamora, and Aurell, 2019                        | Ferratges et al. (2019)                         |
| Crown     | Calappoidea          | Calappidae               | <i>Calappa zinsmeisteri</i> Feldmann and Wilson, 1988                                   | Feldmann and Wilson (1988)                      |
| Crown     | Cancroidea           | Cancridae                | <i>Anatolikos undecimspinosus</i> Schweitzer et al. 2006                                | Schweitzer et al. (2006)                        |
| Crown     | Dorippoidea          | Dorippidae               | <i>Bartethusa hepatica</i> Quayle and Collins, 1981                                     | Quayle and Collins (1981)                       |
| Crown     | Leucosioidea         | Leucosiidae              | <i>Typilobus alponensis</i> Beschin, De Angeli, and Zorzin, 2009                        | Beschin et al. (2009)                           |
| Crown     | Goneplacoidea        | Euryplacidae             | <i>Chirinocarcinus wichmanni</i> (Feldmann et al., 1995) (as <i>Glyphithyreus</i> )     | Feldmann et al. (1995)                          |

|       |               |                   |                                                                                          |                             |
|-------|---------------|-------------------|------------------------------------------------------------------------------------------|-----------------------------|
| Crown | Eriphioidea   | Eriphiidae        | <i>Eriphia verrucosa</i> (Forskål, 1775) (as <i>Cancer</i> )                             | Betancort et al. (2014)     |
| Crown | Trapezioidea  | Trapeziidae       | <i>Archaeotetra lessinea</i> De Angeli and Ceccon, 2013                                  | De Angeli and Ceccon (2013) |
| Crown | Eriphioidea   | Oziidae           | <i>Ozius collinsi</i> Karasawa, 1992                                                     | Karasawa (1992)             |
| Crown | Pilumnoidea   | Pilumnidae        | <i>Glabropilumnus trispinosus</i> Beschin, Busulini, and Tessier in Beschin et al., 2016 | Beschin et al. (2016)       |
| Crown | Goneplacoidea | Goneplacidae      | <i>Carcinoplax temikoensis</i> Feldmann and Maxwell, 1990                                | Feldmann and Maxwell (1990) |
| Crown | Xanthoidea    | Pseudorhombilidae | <i>Pseudorhombila patagonica</i> Glaessner, 1933                                         | Glaessner (1933)            |
| Crown | Xanthoidea    | Panopeidae        | <i>Panopeus incisus</i> Beschin, Busulini, De Angeli, and Tessier, 2007                  | Beschin et al. (2007)       |
| Crown | Xanthoidea    | Xanthidae         | <i>Phlyctenodes edwardsi</i> Beschin, Busulini, and Tessier in Beschin et al., 2016      | Beschin et al. (2016)       |

## Fossil Calibrations References

- Bachmayer F., Mundlos R. 1968. Die tertiären Krebse von Helmstedt bei Braunschweig, Deutschland. *Annalen des Naturhistorischen Museums in Wien*:649–692.
- Beschin C., Busulini A., De Angeli A., Tessier G. 2007. I decapodi dell'Eocene inferiore di Contrada Gecchelina (Vicenza, Italia settentrionale) (Anomura e Brachyura). *Museo di archeologia e scienze naturali G. Zannato*:1–84.
- Beschin C., Busulini A., Tessier G., Zorzin R. 2016. I crostacei associati a coralli nell'Eocene inferiore dell'area di Bolca: Verona e Vicenza, Italia nordorientale.
- Beschin C., De Angeli A., Checchi A. 2001. Crostacei decapodi associati a coralli della “Formazione di Castelgomberto”(Oligocene)(Vicenza—Italia settentrionale). *Studi e Ricerche, Associazione Amici del Museo, Museo Civico “G. Zannato”, Montecchio Maggiore (Vicenza)*. 2001:13-30.
- Beschin C., De Angeli A., Zorzin R. 2009. Crostacei fossili del Veneto: una inedita fauna eocenica dei Lessini orientali (Monte Serea di San Giovanni Ilarione, Verona), con descrizione di tre nuove specie. *Bollettino del Museo civico di Storia naturale di Verona*. 33:59–83.
- Betancort J.F., Lomoschitz Mora-Figueroa A., Meco J. 2014. Mio-Pliocene crustaceans from the Canary Islands, Spain. *Rivista Italiana di paleontologia e Stratigrafia*. 120:337–349.
- Brito I.M. 1972. Contribuição ao Conhecimento dos Crustáceos Decápodos da Formação Pirabas. II — O Gênero *Uca* (Brachyura-Ocypodidae). *Anais da Academia Brasileira de Ciências*. 44:95–98.
- Ceccon L., De Angeli A. 2019. Un nuovo costaceo Percnidae dell'Oligocene di Sant'Urbano, Vicenza, Italia settentrionale. *Bollettino del Museo Civico di Storia Naturale di Verona*. 43:17–22.
- Collins J.S.H., Donovan S.K. 1998. Some new crab records (Crustacea: Decapoda) from the late Pleistocene Port Morant Formation of southeast Jamaica. *Bull. Miz. Fossil Mus.* 24:73–77.
- De Angeli A., Caporiondo F. 2019. *Alontecarcinus buratoi* n. gen., n. sp. (Decapoda, Brachyura, Potamonidae) un nuovo crostaceo d'acqua dolce dell'Eocene (Bartoniano) di Alonte (Monti Berici, Vicenza, Italia settentrionale). *Bollettino del Museo Civico di Storia Naturale di Verona*. 43:5–16.
- De Angeli A., Ceccon L. 2013. Tetraliidae and Trapeziidae (Crustacea, Decapoda, Brachyura) from the Early Eocene of Monte Magrè (Vicenza, NE Italy). *Natural History Sciences*. 154:25–40.
- De Angeli A., Ceccon L. 2015. Nuovi crostacei Brachyura dell'Eocene di Monte Magrè (Vicenza, Italia settentrionale). *Lavori Società veneziana di Scienze naturali*. 40:119–138.
- Feldmann R.M., Casadío S., Chirino-Galvez L., Aguirre-Urreta M. 1995. Fossil decapod crustaceans from the Jagüel and Roca formations (Maastichtian–Danian) of the Neuquén Basin, Argentina. *J. Paleontol.* 69:1-22.
- Feldmann R.M., Maxwell P.A. 1990. Late Eocene decapod Crustacea from North Westland, South Island, New Zealand. *J. Paleontol.* 64:779–797.
- Feldmann R.M., Schweitzer C.E. 2009. Revision of Jurassic Homoloidea De Haan, 1839, from the Ernstbrunn and Štramberg limestones, Austria and the Czech Republic. *Annalen des Naturhistorischen Museums in Wien*.

- Serie A für Mineralogie und Petrographie, Geologie und Paläontologie, Anthropologie und Prähistorie:183-205.
- Feldmann R.M., Wilson M.T. 1988. Eocene decapod crustaceans from Antarctica. Geological Society of America Memoir. 169:465–488.
- Ferratges F.A., Zamora S., Aurell M. 2019. A new genus and species of Parthenopidae MacLeay, 1838 (Decapoda: Brachyura) from the lower Eocene of Spain. J. Crust. Biol. 39:303-311.
- Forir H. 1887. Contributions à l'étude du système créacé de la Belgique. II. Études complémentaires sur les crustacés. Annales de la Société géologique de Belgique. 14:155-175.
- Forskål, P., 1775. Descriptiones Animalium, Avium, Amphibiorum, Piscium, Insectorum, Vermium, quae in itinere orientali observavit Petrus Forskål: 1–19, i-xxxiv, 1–164, 1.
- Glaessner M.F. 1933. I.—New tertiary crabs in the collection of the British Museum. Journal of Natural History Series 10. 12:1-28.
- Karasawa H. 1992. Fossil decapod crustaceans from the Manda Group (middle Eocene), Kyushu, Japan. Transactions and Proceedings of the Palaeontological Society of Japan, (new series):1247–1258.
- Klaus S., Magalhães C., Salas-Gismondi R., Gross M., Antoine P.-O. 2017. Paleogene and Neogene brachyurans of the Amazon Basin: A revised first appearance date for primary freshwater crabs (Crustacea, Brachyura, Trichodactylidae). Crustaceana. :953–967.
- Latreille, P. A. 1825–1828. Encyclopédie méthodique, Histoire naturelle: Entomologie, ou histoire naturelle des crustacés, des arachnides et des insectes. Imprimerie-Libraire, Paris: Chez Mme veuve Agasse.
- Luque J., Allison W.T., Bracken-Grissom H.D., Jenkins K.M., Palmer A.R., Porter M.L., Wolfe J.M. 2019. Evolution of crab eye structures and the utility of ommatidia morphology in resolving phylogeny. bioRxiv, preprint:786087. <https://doi.org/10.1101/786087>.
- Luque J., Feldmann R.M., Schweitzer C.E., Jaramillo C., Cameron C.B. 2012. The oldest frog crabs (Decapoda: Brachyura: Raninoidea) from the Aptian of northern South America. J. Crust. Biol. 32:405–420.
- Luque J., Schweitzer C.E., Santana W., Portell R.W., Vega F.J., Klompmaker A.A. 2017. Checklist of fossil decapod crustaceans from tropical America, Part I: Anomura and Brachyura. Nauplius 25:e2017025.
- Müller P. 2006. New decapods from the Miocene of Hungary—with remarks about their environment. Földtani Közlöny. 136:37-50.
- Müller P., Collins J.S.H. 1991. Late Eocene coral-associated decapods (Crustacea) from Hungary. Contributions to Tertiary and Quaternary Geology. 28:47–92.
- Ossó À. 2016. *Eogeryon elegius* n. gen. and n. sp. (Decapoda: Eubrachyura: Portunoidea), one of the oldest modern crabs from late Cenomanian of the Iberian Peninsula. Bol. Soc. Geol. Mex. 68:231–246.
- Quayle W.J., Collins J.S.H. 1981. New Eocene crabs from the Hampshire Basin. Palaeontology. 24:733–758.
- Rathbun M.J. 1935. Fossil Crustacea of the Atlantic and Gulf Coastal Plain. Geological Society of America. Special Paper:i–viii, 1–160.
- Robins C.M., Klompmaker A.A. 2019. Extreme diversity and parasitism of Late Jurassic squat lobsters (Decapoda: Galatheaidea) and the oldest records of porcellanids and galatheids. Zool. J. Linn. Soc. 187:1131-1154.
- Schweitzer C.E., Feldmann R.M. 2010. New fossil decapod crustaceans from the Remy Collection, Muséum national d'Histoire naturelle, Paris. Geodiversitas. 32:399–415.
- Schweitzer C.E., Feldmann R.M., González-Barba G., Cosovic V. 2006. New Decapoda (Anomura, Brachyura) from the Eocene Bateque and Tepetate Formations, Baja California Sur, Mexico. Bull. Miz. Fossil Mus. 33:21–45.
- Serrano-Sánchez M.d.L., Guerao G., Centeno-García E., Vega F.J. 2016. Crabs (Brachyura: Grapsoidea: Sesarmidae) as inclusions in Lower Miocene amber from Chiapas, Mexico. Bol. Soc. Geol. Mex. 68:37–43.
- Stenzel H.B. 1944. A new Cretaceous crab, *Graptocarcinus muiri*, from Mexico. J. Paleontol. 18:550–552.

## Text S2. Natural History References

- Aagaard A., Styris have B., Warman C.G., Depledge M.H. 2000. The use of cardiac monitoring in the assessment of mercury toxicity in the subtropical pebble crab *Gaetice depressus* (Brachyura: Grapsidae: Varuninae). *Sci. Mar.* 64:381–386.
- Abele L.G. 1979. The community structure of coral-associated decapod crustaceans in variable environments. In: Livingston R.J., editor. *Ecological Processes in Coastal and Marine Systems*. Boston, MA: Springer US. p. 265–287.
- Adamczewska A.M., Morris S. 2000. Locomotion, respiratory physiology, and energetics of amphibious and terrestrial crabs. *Physiological and Biochemical Zoology*. 73:706–725.
- Agusto L.E., Fratini S., Jimenez P.J., Quadros A., Cannicci S. 2021. Structural characteristics of crab burrows in Hong Kong mangrove forests and their role in ecosystem engineering. *Estuarine, Coastal and Shelf Science*. 248:106973.
- Al-Aidaros A.M., Al-Haj A.E., Kumar A.A.J. 2014. Complete larval development of the Brachyuran crab (*Epixanthus frontalis* H. Milne Edwards, 1834) (Crustacea, Decapoda, Eriphioidea, Oziidae) under laboratory conditions. *Zootaxa*. 3815:29.
- Arias-Pineda J.Y., Gómez D.A., Magalhães C. 2015a. Range extension of the genus *Fredilocarcinus* Pretzmann, 1978 (Crustacea: Decapoda: Trichodactylidae) to Colombia. *Checklist: The Journal of Biodiversity Data*. 11:1586.
- Augusto A., Greene L.J., Laure H.J., Mcnamara J.C. 2007. Adaptive shifts in osmoregulatory strategy and the invasion of freshwater by brachyuran crabs: evidence from *Dilocarcinus pagei* (Trichodactylidae). *J. Exp. Zool.* 307A:688–698.
- Banerjee S., Ramakrishnan S.C. 2022. The first record of *Ozius tuberculosus* H. Milne Edwards (Crustacea: Decapoda: Brachyura) from the East Coast of Indian subcontinent. *Research Square*.
- Barnes R.S.K. 1967. The osmotic behaviour of a number of grapsoid crabs with respect to their differential penetration of an estuarine system. *Journal of Experimental Biology*. 47:535–551.
- Barnwell F.H. 1968. The role of rhythmic systems in the adaptation of fiddler crabs to the intertidal zone. *Am Zool.* 8:569–583.
- Bello-González O.C., Wehrtmann I.S., Magalhães C. 2016. First confirmed report of a primary freshwater crab (Brachyura: Pseudothelphusidae) associated with bromeliads in the Neotropics. *Journal of Crustacean Biology*. 36:303–309.
- Bennett D.B. 1995. Factors in the life history of the edible crab (*Cancer pagurus* L.) that influence modelling and management. *ICES Mar. Sci. Symp.*, 199: 89-98.
- Bento M., Paula J. 2018. Keys and bibliography for the identification of zoeal stages of brachyuran crabs from the Western Indian Ocean. *Western Indian Ocean Journal of Marine Science*. 17:13-51.
- Bianchini A., Gilles R. 1996. Toxicity and accumulation of mercury in three species of crabs with different osmoregulatory capacities. *Bulletin of Environmental Contamination and Toxicology*. 57:91–98.
- Branch G.M., Grindley J.R. 1979. Ecology of southern African estuaries Part XI. Mngazana: a mangrove estuary in Transkei. *South African Journal of Zoology*. 14:149–170.
- Bright D.B., Hogue C.L. 1972. A synopsis of the burrowing land crabs of the world and list of their arthropod symbionts and burrow associates. *Contributions in Science*. 220:1–58.
- Brown S., Bert T. 1993. The effects of temperature and salinity on molting and survival of *Menippe adina* and *M. mercenaria* (Crustacea, Decapoda) postsettlement juveniles. *Mar. Ecol. Prog. Ser.* 99:41–49.
- Brown S.D., Bert T.M., Tweedale W.A., Torres J.J., Lindberg W.J. 1992. The effects of temperature and salinity on survival and development of early life stage Florida stone crabs *Menippe mercenaria* (Say). *Journal of Experimental Marine Biology and Ecology*. 157:115–136.
- Cannicci S., Ruwa R.K., Giuggioli M. 1998. Predatory activity and spatial strategies of *Epixanthus dentatus* (Decapoda: Oziidae), an ambush predator among the mangroves. *Journal of Crustacean Biology*. 18(1): 57-63.
- Charmantier G., Charmantier-Daures M. 1991. Ontogeny of osmoregulation and salinity tolerance in *Cancer irroratus*; elements of comparison with *C. borealis* (Crustacea, Decapoda). *The Biological Bulletin*. 180:125–134.
- Chen T.-Y., Hwang G.-W., Mayfield A.B., Chen C.-P., Lin H.-J. 2019. The development of habitat suitability models for fiddler crabs residing in subtropical tidal flats. *Ocean & Coastal Management*. 182:104931.

- Cieluch U., Anger K., Aujoulat F., Buchholz F., Charmantier-Daures M., Charmantier G. 2004. Ontogeny of osmoregulatory structures and functions in the green crab *Carcinus maenas* (Crustacea, Decapoda). *Journal of Experimental Biology*. 207:325–336.
- Clark P.F., Paula J. 2003. Descriptions of ten xanthoidean (Crustacea: Decapoda: Brachyura) first stage zoeas from Inhaca island, Mozambique. *Raffles Bulletin of Zoology*. 51:323–378.
- Cook B.D., Pringle C.M., Hughes J.M. 2008. Phylogeography of an island endemic, the Puerto Rican Freshwater Crab (*Epilobocera sinuatifrons*). *Journal of Heredity*. 99:157–164.
- Cuesta J.A., Guerao G., Liu H.-C., Schubart C.D. 2006. Morphology of the first zoeal stages of eleven Sesarmidae (Crustacea, Brachyura, Thoracotremata) from the Indo-West Pacific, with a summary of familial larval characters. *Invertebrate Reproduction & Development*. 49:151–173.
- Cumberlidge N. 1991. The Respiratory System of *Globonantes macropus* (Rathbun, 1898), a terrestrial freshwater crab from Liberia (Gecarcinucoidea, Gecarcinucidae). *Crustac.* 61:69–80.
- Cumberlidge N. 2008. Insular species of Afrotropical freshwater crabs (Crustacea: Decapoda: Brachyura: Potamonautidae and Potamidae) with special reference to Madagascar and the Seychelles. *Contributions to Zoology*. 77:71–81.
- Cumberlidge N. 2009. The status and distribution of freshwater crabs [West Africa]. In: *The Status and Distribution of Freshwater Biodiversity in Western Africa*. Compilers: Smith, K.G., Diop, M.D., Niane, M. and Darwall, W.R.T. IUCN & Wetlands International report. Gland, Switzerland and Cambridge, UK: pp56–72
- Curtis D.L., McGaw I.J. 2008. A year in the life of a Dungeness crab: methodology for determining microhabitat conditions experienced by large decapod crustaceans in estuaries. *Journal of Zoology*. 274:375–385.
- Davie P.J.F., Guinot D., Ng P.K.L. 2015. Anatomy and functional morphology of Brachyura. *Crustacea* 9C (71-2): 11–163.
- Depledge M.H. 1989. Observations on the feeding behaviour of *Gaetice depressus* (Grapsidae: Varuninae) with special reference to suspension feeding. *Marine Biology*. 100:253–259.
- Diamond D.W., Scott L.K., Forward R.B., Kirby-Smith W. 1989. Respiration and osmoregulation of the estuarine crab, *Rhithropanopeus harrisi* (Gould): Effects of the herbicide, Alachlor. *Comparative Biochemistry and Physiology Part A: Physiology*. 93:313–318.
- Dornelas M., Paula J., Macia A. 2003. The larval development of *Hymenosoma orbiculare* Desmarest, 1825 (Crustacea: Decapoda: Brachyura: Hymenosomatidae). *Journal of Natural History*. 37:2579–2597.
- Eckhardt E., Pierrot C., Thuet P., Van Herp F., Charmantier-Daures M., Trilles J. P., Charmantier, G. 1995. Stimulation of osmoregulating processes in the perfused gill of the crab *Pachygrapsus marmoratus* (Crustacea, Decapoda) by a sinus gland peptide. *General & Comparative Endocrinology*. 99:169–177.
- Edkins M.T., Teske P.R., Papadopoulos I., Griffiths C.L. 2007. Morphological and genetic analyses suggest that southern African crown crabs, *Hymenosoma orbiculare*, represent five distinct species. *Crustaceana*. 80:667–683.
- Edwards M. 1986. Bimodal respiration, water balance and acid-base regulation in a high-shore crab, *Cyclograpsus lavauxi* H. Milne Edwards. *J. Exp. Mar. Bio. Ecol.*, Vol. 100, pp. 127 - 145.
- Erkan M., Balkis H., Tunali Y., Oliveria E. 2009. Morphology of testis and vas deferens in the xanthoid crab, *Eriphia verrucosa* (Forskål, 1775) (Decapoda: Brachyura). *Journal of Crustacean Biology*. 29:458–465.
- Eshky A., Atkinson R., Taylor A. 1995. Physiological ecology of crabs from Saudi Arabian mangrove. *Mar. Ecol. Prog. Ser.* 126:83–95.
- Esser L.J., Cumberlidge N. 2011. Evidence that salt water may not be a barrier to the dispersal of Asian freshwater crabs (Decapoda: Brachyura: Gecarcinucidae and Potamidae). *Raffles Bulletin of Zoology*, 59(2): 259–268.
- Fadlaoui S., Melhaoui M. 2019. Population structure of the freshwater crab *Potamon algeriense* (Bott, 1967) inhabiting Oued Zegzel, (Northeast of Morocco). *International Journal of Ecology*. 2019:1–7.
- Felder D.L., Martin J.W., Goy J.W. 2017. Patterns in early postlarval development of decapods. In: Schram F.R., Wenner A.M., editors. *Crustacean Issues 2*. Routledge. p. 163–225.
- Fernandes L.S., Sant’Anna B.S., Hattori G.Y. 2020. Amazon freshwater crab *Dilocarcinus pagei* (Decapoda: Trichodactylidae): a view about burrow construction behavior. *Lat. Am. J. Aquat. Res.* 48:85–93.
- Figueiredo J., Penha-Lopes G., Anto J., Narciso L., Lin J. 2008. Fecundity, brood loss and egg development through embryogenesis of *Armases cinereum* (Decapoda: Grapsidae). *Mar Biol.* 154:287–294.
- Farhadi A., Harlioglu M.M. 2018. Distribution and diversity of freshwater crabs (Decapoda: Brachyura: Potamidae, Gecarcinucidae) in Iranian inland waters. *Aquatic Sciences and Engineering*:110–116.
- Felder D.L., Rabalais N.N. 1986. The Genera *Chasmocarcinus* Rathbun and *Speocarcinus* Stimpson on the Continental Shelf of the Gulf of Mexico, with Descriptions of Two New Species (Decapoda: Brachyura: Goneplacidae). *Journal Of Crustacean Biology*. 6:30.

- Foale S. 1999. Local Ecological Knowledge and Biology of the Land Crab *Cardisoma hirtipes* (Decapoda: Gecarcinidae) at West Nggela, Solomon Islands. *Pacific Science*. 53:13.
- Forward R.B. 2009. Larval Biology of the Crab *Rhithropanopeus harrisi* (Gould): A Synthesis. *The Biological Bulletin*. 216:243–256.
- Fowler A., Forsström T., von Numers M., Vesakoski O. 2013. The North American mud crab *Rhithropanopeus harrisi* (Gould, 1841) in newly colonized Northern Baltic Sea: distribution and ecology. *Aquatic Invasions*. 8:89–96.
- Fukuda Y. 1990. Early larval and postlarval morphology of the soldier crab, *Mictyris brevidactylus* Stimpson (Crustacea: Brachyura: Mictyridae). *Zoological Science*. 7:303–309.
- Fukui Y. 1988. Comparative Studies on the Life History of the Grapsid Crabs (Crustacea, Brachyura) Inhabiting Intertidal Cobble and Boulder Shores. *Publ. SMBL*. 33:121–162.
- Full R.J., II C.F.H., Assad J.A. 1985. Energetics of the Exercising Wharf Crab *Sesarma cinereum*. *Physiological Zoology*. 58:605–615.
- Galil B., Vannini M. 1990. Research on the coast of Somalia. Xanthidae Trapeziidae Carpilliidae Menippidae (Crustacea Brachyura). *Tropical Zoology*. 3:21–56.
- Giraldes B.W., Chatting M., Smyth D. 2019. The fishing behaviour of *Metopograpsus messor* (Decapoda: Grapsidae) and the use of pneumatophore-borne vibrations for prey-localizing in an arid mangrove setting. *J. Mar. Biol. Ass.* 99:1353–1361.
- Goodman S.H., Cavey M.J. 1990. Organization of a phyllobranchiate gill from the green shore crab *Carcinus maenas* (Crustacea, Decapoda). *Cell Tissue Res*. 260:495–505.
- Guerao G. 2004. Complete larval and early juvenile development of the mangrove crab *Perisesarma fasciatum* (Crustacea: Brachyura: Sesarmidae) from Singapore, with a larval comparison of *Parasesarma* and *Perisesarma*. *Journal of Plankton Research*. 26:1389–1408.
- Guinot D. 2007. A new genus of the family Plagusiidae Dana, 1851, close to *Plagusia* Latreille, 1804 (Crustacea, Decapoda, Brachyura). *Zootaxa*. 1498:27–33.
- Hartnoll R. 2009. Sexual Maturity and Reproductive Strategy of the Rock Crab *Grapsus adscensionis* (Osbeck, 1765) (Brachyura, Grapsidae) on Ascension Island. *Crustac*. 82:275–291.
- Hartnoll R.G. 1976. The ecology of some rocky shores in tropical East Africa. *Estuarine and Coastal Marine Science*. 4:1–21.
- Hegerl E.J., Davie J.D.S. 1970. The mangrove forests of Cairns, Northern Australia. *Mar. Res. Indonesia*. 18:23–57.
- Herreid C.F., Gifford C.A. 1963. The Burrow Habitat of the Land Crab, *Cardisoma guanhumi* (Latreille). *Ecology*. 44:773–775.
- Hill B.J., Forbes A.T. 1979. Biology of *Hymenosoma orbiculare* Desm in Lake Sibaya. *South African Journal of Zoology*. 14:75–79.
- Holsman K., McDonald P., Armstrong D. 2006. Intertidal migration and habitat use by subadult Dungeness crab *Cancer magister* in a NE Pacific estuary. *Mar. Ecol. Prog. Ser.* 308:183–195.
- Hsueh P.-W. 2018. A new species of *Neorhynchoplax* (Crustacea: Decapoda: Brachyura: Hymenosomatidae) from Taiwan. *Zootaxa*. 4461:350.
- Huang J.-F., Yang S.-L., Ng P.K.L. 1998. Notes On the Taxonomy and Distribution of Two Closely Related Species of Ghost Crabs, *Ocypode sinensis* and *O. cordimanus* (Decapoda, Brachyura, Ocypodidae). *Crustac*. 71:942–954.
- Hunter K.C., Rudy P.P. 1975. Osmotic and ionic regulation in the Dungeness crab, *Cancer magister* Dana. *Comparative Biochemistry and Physiology Part A: Physiology*. 51:439–447.
- Vázquez-López H., Vega-Villasante F., Rodríguez-Varela A.C., Cruz-Gómez A. 2014. Population density of the land crab *Cardisoma crassum* Smith, 1870 (Decapoda: Gecarcinidae) in the estuary El Salado, Puerto Vallarta, Jalisco, Mexico. *International Journal of Innovative and Applied Research*. 2:1–9.
- IUCN. 2008a. *Ceylonthelphusa alpina*: Bahir, M.M., Ng, P.K.L., Crandall, K. & Pethiyagoda, R. and Cumberlidge, N.: The IUCN Red List of Threatened Species 2008: e.T61690A12525900. .
- IUCN. 2008b. *Potamonautes perlatus*: Cumberlidge, N.: The IUCN Red List of Threatened Species 2008: e.T64389A12767481. .
- IUCN. 2016. *Seychellum alluaudi*: Cumberlidge, N.: The IUCN Red List of Threatened Species 2016: e.T58511956A58513166
- IUCN. 2018. *Parathelphusa pantherina*: Schubart, C.: The IUCN Red List of Threatened Species 2018: e.T134415A109682928
- IUCN. 2018. *Syntripsa flavichela*: Schubart, C.: The IUCN Red List of Threatened Species 2018: e.T134942A109683110. .



- Jones D.A. 1972. Aspects of the ecology and behaviour of *Ocypode ceratophthalmus* (Pallas) and *O. kuhlii* de Haan (Crustacea: Ocypodidae). *Journal of Experimental Marine Biology and Ecology*. 8:31-43.
- Kennish R., Williams G. 1997. Feeding preferences of the herbivorous crab *Grapsus albolineatus*: The differential influence of algal nutrient content and morphology. *Mar. Ecol. Prog. Ser.* 147:87-95.
- Kepel' A.A., Tsareva L.A. 2005. First Record of Tropical Crabs *Portunus sanguinolentus* (Herbst, 1783) and *Plagusia depressa tuberculata* Lamarck, 1818 in Peter the Great Bay, Sea of Japan. *Russ J Mar Biol.* 31:124-125.
- Kim S.Y., Yi C.H., Kim J.M., Choi W.Y., Kim H.S., Kim M.-S. 2020. DNA Barcoding of the Marine Protected Species *Parasesarma bidens* (Decapoda: Sesarmidea) from the Korean Waters. *Animal Systematics, Evolution and Diversity*. 36:159-163.
- Kitaura J., Wada K., Nishida M. 2002. Molecular phylogeny of grapsoid and ocypodoid crabs with special reference to the genera *Metaplex* and *Macrophthalmus*. *Journal Of Crustacean Biology*. 22:12.
- Kobayashi S., Archdale M.V. 2022. Burrow utilization by the Japanese mitten crab *Eriocheir japonica* in the clay sediment of a freshwater river of Kyushu, Japan. *Crust Res.* 51:17-29.
- Kobayashi S., Vazquez Archdale M. 2021. Habitat preference and locomotive traits of the Japanese mitten crab *Eriocheir japonica* within the stream unit of the freshwater river environment. *Limnologica*. 88:125870.
- Krediet C.J., Donahue M.J. 2009. Growth-mortality trade-offs along a depth gradient in *Cancer borealis*. *Journal of Experimental Marine Biology and Ecology*. 373:133-139.
- Krishnan T., Kannupandi T. 1988. Larval development of *Elamena (Trigonoplax) cimex* Kemp, 1915 in the laboratory: The most unusual larvae known in the Brachyura (Crustacea: Decapoda). *Bulletin Of Marine Science*. 43:14.
- Krishnan T., Kannupandi T. 1989. Laboratory cultured zoeae and megalopa of the mangrove crab *Metaplex distincta* H.Milne Edwards, 1852 (Brachyura: Sesarminae). *J Plankton Res.* 11:633-648.
- Kunsook C., Dumrongrojwattana P. 2017. Species diversity and abundance of marine crabs (Portunidae: Decapoda) from a collapsible crab trap fishery at Kung Krabaen Bay, Chanthaburi Province, Thailand. *Tropical Life Sciences Research*. 28:45-67.
- Kunsook C., Karinthanyakit W. 2021. Diversity, Abundance and Population Structure of Shore Crabs (Decapoda: Brachyura; Menippidae, Eriphidae, Xanthidae, Oziidae) at Nom Sao Island, Chanthaburi Province, the Eastern Gulf of Thailand. *ASEAN Journal of Scientific and Technological Reports*. 24:15-26.
- Le Vay L., Ut V.N., Walton M. 2007. Population ecology of the mud crab *Scylla paramamosain* (Estampador) in an estuarine mangrove system; a mark-recapture study. *Mar Biol.* 151:1127-1135.
- Lee S.H. 2022. Morphology of First Zoea Stage of *Sphaerozius nitidus* (Decapoda: Eriphioidea: Menippidae) Reared in the Laboratory Material. *Animal Systematics, Evolution and Diversity*. 38:83-90.
- Lewis L., Ayers J. 2014. Temperature preference and acclimation in the Jonah Crab, *Cancer borealis*. *Journal of Experimental Marine Biology and Ecology*. 455:7-13.
- Li J.-J., Shih H.-T., Ng P.K.L. 2019. Three New Species and Two New Records of *Parasesarma* De Man, 1895 (Crustacea: Brachyura: Sesarmidae) from Taiwan and the Philippines from Morphological and Molecular Evidence. *Zoological Studies*:23.
- Liu H.-C., Jeng M.-S. 2007. Some Reproductive Aspects of *Gecarcoidea lalandii* (Brachyura: Gecarcinidae) in Taiwan. *Zoological Studies*:8.
- Lucas J.S. 1980. Spider crabs of the family Hymenosomatidae (Crustacea; Brachyura) with particular reference to Australian species: Systematics and biology. *Rec. Aust. Mus.* 33:148-247.
- Lucas J.S. 1971. The larval stages of some Australian species of *Halicarcinus* (Crustacea, Brachyura, Hymenosomatidae). I. Morphology. *Bulletin of Marine Science*. 21:471-490.
- Lucas J.S. 1972. The larval stages of some Australian species of *Halicarcinus* (Crustacea, Brachyura, Hymenosomatidae). II. Physiology. *Bulletin of Marine Science*. 25:824-840.
- Madambashi A.M., Christofolletti R.A., Pinheiro M.A.A. 2005. Natural diet of the crab *Menippe nodifrons* Stimpson, 1859 (Brachyura, Menippidae) in Paranapuã Beach, São Vicente. *Nauplius* 13:77-82.
- Madeira D., Narciso L., Cabral H.N., Diniz M.S., Vinagre C. 2012. Thermal tolerance of the crab *Pachygrapsus marmoratus*: intraspecific differences at a physiological (CTMax) and molecular level (Hsp70). *Cell Stress and Chaperones*. 17:707-716.
- Magalhaes C. 1996. Taxonomy of the Neotropical freshwater crab family Trichodactylidae III. The genera *Fredilocarcinus* and *Goyazana*. *Senckenbergiana biologica*:12.
- Magalhães C., Barbosa U.C., Py-Daniel V. 2006. Decapod crustaceans used as food by the Yanomami Indians of the Balawa-ú village, State of Amazonas, Brazil. *Acta Amaz.* 36:369-374.
- Maitland D.P. 1986. Crabs that breathe air with their legs-*Scopimera* and *Dotilla*. *Nature* 319:493-495.

- Maitland D.P. 1990. Aerial respiration in the semaphore crab, *Heloeccius cordiformis*, with or without branchial water. *Comparative Biochemistry and Physiology Part A: Physiology*. 95:267–274.
- Marijnissen S.A.E., Michel E., Daniels S.R., Erpenbeck D., Menken S.B.J., Schram F.R. 2006. Molecular evidence for recent divergence of Lake Tanganyika endemic crabs (Decapoda: Platyhelphusidae). *Molecular Phylogenetics and Evolution*. 40:628–634.
- Matsumasa M., Kikuchi S., Takeda S., Poovachiranon S., Yong H.-S., Murai M. 2001. Blood Osmoregulation and Ultrastructure of the Gas Windows (‘Tympana’) of Intertidal Ocypodid Crabs: *Dotilla* vs. *Scopimera*. *Benthos Research*. 56:47–55.
- McGaw I.J. 2005. Burying behaviour of two sympatric crab species: *Cancer magister* and *Cancer productus*. *Sci. Mar.* 69:375–381.
- Melrose M.J. 1975. The Marine Fauna of New Zealand: Family Hymenosomatidae (Crustacea, Decapoda, Brachyura). :123.
- Miculka B. 2009. Burrowing Habits, Habitat Selections, and Behaviors of Four Common Dominican Land Crabs; *Guinotia dentata*, *Gecarcinus lateralis*, *Gecarcinus ruricola*, and *Cardisoma guanhumi*. :16.
- Molina Z.S., Neri J.B., Cañete R.M.P., Metillo E.B. 2020. Body Size, Habitat, and Diet of Freshwater Crabs *Isolapotamon mindanaoense* and *Sundathelphusa miguelito* (Crustacea: Brachyura) in the Municipality of Lake Sebu, South Cotabato, Philippines. *Science Diliman*:21.
- Morris S. 2002. The ecophysiology of air-breathing in crabs with special reference to *Gecarcoidea natalis*. *Comparative Biochemistry and Physiology Part B: Biochemistry and Molecular Biology*. 131:559–570.
- Mossolin, E.C., Mantelatto F.L. 2008. Taxonomic and distributional results of a freshwater crab fauna survey (Family Trichodactylidae) on São Sebastião Island (Ilhabela), South Atlantic, Brazil. *Acta Limnologica Brasiliensia*. 20:125–129.
- Murai M., Henmi Y., Matsumasa M., Backwell P.R.Y., Takeshita F. 2022. Attraction waves of male fiddler crabs: A visual display designed for efficacy. *Journal of Experimental Marine Biology and Ecology*. 546:151665.
- Naderloo R., Fatemi Y. 2015. New record of the rare alien grapsoid crab *Percnon affine* (H. Milne Edwards, 1853) (Crustacea, Decapoda, Grapsoidea, Plagusidae) from the northern Indian Ocean. *Mar. Biodivers. Rec.* 8:e92.
- Naderloo R., Türkay M. 2009. A new species of the genus *Nanosesarma* (Crustacea: Decapoda: Brachyura: Sesamidae), and redescription of *Nanosesarma jousseaumei* (Nobili, 1906), including new records from the Persian Gulf. *Journal of Natural History*. 43:2911–2923.
- Naderloo R., Türkay M., Sari A. 2013. Intertidal habitats and decapod (Crustacea) diversity of Qeshm Island, a biodiversity hotspot within the Persian Gulf. *Mar Biodiv.* 43:445–462.
- Ng P.K.L., Dudgeon D. 1992. The Potmididae and Parathelphusidae (Crustacea: Decapoda: Brachyura) (Crustacea: Decapoda: Brachyura) of Hong Kong. *Invertebrate Systematics*:28.
- Ng P.K.L. 1995. *Somanniathelphusa lacuvita*, a new ricefield crab from Tonle Sap, Cambodia. *Asian Journal of Tropical Biology*:6.
- Ng P.K.L., Manuel-Santos M.R. 2007. Establishment of the Vultocinidae, a new family for an unusual new genus and new species of Indo-West Pacific crab (Crustacea: Decapoda: Brachyura: Goneplacoidea), with comments on the taxonomy of the Goneplacidae. *Zootaxa*. 1558:39–68.
- Ng P.K.L., Ng P.Y.C. 2021. Land crabs (Crustacea: Brachyura: Gecarcinidae) of Singapore. *Nature in Singapore*. 14:113.
- Niu J., Hu X.L., Ip J.C.H., Ma K.Y., Tang Y., Wang Y., Qin J., Qiu J.-W., Chan T.F., Chu K.H. 2020. Multi-omic approach provides insights into osmoregulation and osmoconformation of the crab *Scylla paramamosain*. *Sci Rep.* 10:21771.
- Novak M. 2004. Diurnal activity in a group of Gulf of Maine decapods. *Crustac.* 77:603–620.
- Nye P.A. 1974. Burrowing and burying by the crab *Macrophthalmus hirtipes*. *New Zealand Journal of Marine and Freshwater Research*. 8:243–254.
- de Oliveira Rocha C.A., de Lira J.J.P.R., de Lemos Santana J., Guimarães M.P., dos Santos Calado T.C. 2019. Biological aspects of the marine crab *Plagusia depressa* (Fabricius, 1775) on the northeast coast of Brazil. *Marine Biology Research*. 15:181–190.
- Padate V.P., Vijaylaxmi J., Maurya S., Rivonker C.U. 2015. Morphology and morphometrics of *Dotilla myctiroides* (Decapoda: Brachyura: Dotillidae) from an impacted beach of Goa along west coast of India. 57:7.
- Padghane S., Chavan S. Habitat preference and maintenance of freshwater crab *Barytelphusa cunicularis* in concrete tank culture model. *Journal of Entomology and Zoology Studies*.:7.
- Paoli F., Wirkner C.S., Cannicci S. 2015. The branchiostegal lung of *Uca vocans* (Decapoda: Ocypodidae): Unreported complexity revealed by corrosion casting and MicroCT techniques. *Arthropod Structure & Development*. 44:622–629.

- Papadopoulos I., Newman B.K., Schoeman D.S., Wooldridge T.H. 2006. Influence of salinity and temperature on the larval development of the crown crab, *Hymenosoma orbiculare* (Crustacea: Brachyura: Hymenosomatidae). *African Journal of Aquatic Science*. 31:43–52.
- Pati S.K., Devi A.R.S. 2015. *Spiralothelphusa gibberosa*, a new freshwater crab (Brachyura: Gecarcinucidae) from Thrissur district, Kerala, India. *Zootaxa*. 3963:416.
- Pati S.K., Sharma R.M. 2014. Description of *Ghatiana*, a new genus of freshwater crab, with two new species and a new species of *Gubernatoriana* (Crustacea: Decapoda: Brachyura: Gecarcinucidae) from the Western Ghat Mountains, India. *Journal of Natural History*. 48:1279–1298.
- Paula J. 2004. Patterns of temporal occurrence of brachyuran crab larvae at Saco mangrove creek, Inhaca Island (South Mozambique): implications for flux and recruitment. *Journal of Plankton Research*. 26:1163–1174.
- Paula J., Hartnoll R.G. 1989. The larval and post-larval development of *Perceon gibbesi* (Crustacea, Brachyura, Grapsidae) and the identity of the larval genus *Pluteocaris*. *Journal of Zoology*. 218:17–37.
- Peyrot-Clausade M. 1989. Crab cryptofauna (Brachyura and Anomura) of Tikehau, Tuamotu Archipelago, French Polynesia. *Coral Reefs*. 8:109–117.
- Pinder A.W., Smits A.W. 1993. The Burrow Microhabitat of the Land Crab *Cardisoma guanhumi*: Respiratory/Ionic Conditions and Physiological Responses of Crabs to Hypercapnia. *Physiological Zoology*. 66:216–236.
- Qhaji Y., van Vuuren B.J., Papadopoulos I., McQuaid C., Teske P. 2015. A comparison of genetic structure in two low-dispersal crabs from the Wild Coast, South Africa. *African Journal of Marine Science*. 37:345–351.
- Rasmuson L.K. 2013. The Biology, Ecology and Fishery of the Dungeness crab, *Cancer magister*. *Advances in Marine Biology*. Elsevier. p. 95–148.
- Rodriguez G., Ng P.K.L. 1995. Freshwater Crabs as Poor Zoogeographical Indicators: A Critique of Bănărescu (1990). *Crustaceana*. 68:636–645.
- Rodríguez G., Rodríguez R. 1992. The freshwater crabs of America. Family Trichodactylidae and supplement to the family Pseudothelphusidae. Paris: Orstom.
- Rolier Lara L., Wehrmann I.S., Magalhaes C., Mantelatto F.L. 2013. Species diversity and distribution of freshwater crabs (Decapoda: Pseudothelphusidae) inhabiting the basin of the Rio Grande de Terraba, Pacific slope of Costa Rica. *IJAR*. 41:685–695.
- Rosa L.C. da, Santos R.B. dos, Freire K.M.F. 2018. First record of the cliff crab *Plagusia depressa* (Fabricius, 1775) (Decapoda: Plagusiidae) from the coast of Sergipe, Brazil. *Nauplius*. 26:e2018030.
- Rosenberg M.S. 2020. A fresh look at the biodiversity lexicon for fiddler crabs (Decapoda: Brachyura: Ocypodidae). Part 2: Biogeography. *Journal of Crustacean Biology*. 40:364–383.
- Sastry A.N. 1977. The Larval Development of the Jonah Crab, *Cancer borealis* Stimpson, 1859, Under Laboratory Conditions (Decapoda Brachyura). *Crustac*. 32:290–303.
- Schlotterbeck R.E. 1976. The Larval Development of the Lined Shore Crab, *Pachygrapsus crassipes* Randall, 1840 (Decapoda Brachyura, Grapsidae) Reared in the Laboratory. *Crustac*. 30:184–200.
- Schubart C.D., Cuesta J.A., Felder D.L. 2002. Glyptograpsidae, A New Brachyuran Family From Central America: Larval And Adult Morphology, And A Molecular Phylogeny Of The Grapsoidea. *Journal Of Crustacean Biology*. 22:17.
- Senkman L.E., Negro C.L., Lopretto E.C., Collins P.A. 2015. Reproductive behaviour of three species of freshwater crabs of the family Trichodactylidae (Crustacea: Decapoda) including forced copulation by males. *Marine and Freshwater Behaviour and Physiology*. 48:77–88.
- Shih H.-T., Fang S.-H., Ng P.K.L. 2007. Phylogeny of the freshwater crab genus *Somanniathelphusa* Bott (Decapoda:Parathelphusidae) from Taiwan and the coastal regions of China, with notes on their biogeography. *Invert. Systematics*. 21:29.
- Shih H.-T., Hsu J.-W., Wong K.J.H., Ng N.K. 2019. Review of the mudflat varunid crab genus *Metaplox* (Crustacea, Brachyura, Varunidae) from East Asia and northern Vietnam. *ZK*. 877:1–29.
- Spencer A.M., Fielding A.H., Kamemoto F.I. 1979. The Relationship between Gill NaK-ATPase Activity and Osmoregulatory Capacity in Various Crabs. *Physiological Zoology*. 52:1–10.
- Stanton D.J., Leven M.R., Hui T.C.H. 2017. Distribution of *Cryptopotamon anacoluthon* (Kemp, 1918) (Crustacea: Brachyura: Potamidae), a freshwater crab endemic to Hong Kong. *J. Threat. Taxa*. 9:9786.
- Staton J.L., Sulkin S.D. 1991. Nutritional requirements and starvation resistance in larvae of the brachyuran crabs *Sesarma cinereum* (Bose) and *S. reticulatum* (Say). *Journal of Experimental Marine Biology and Ecology*:14.
- Stutz A.M. 1978. Tidal and diurnal activity rhythms in the striped shore crab *Pachygrapsus crassipes*. *Journal of Interdisciplinary Cycle Research*. 9:41–48.
- Sudha K., Anilkumar G. 1996. Seasonal growth and reproduction in a highly fecund brachyuran crab, *Metopograpsus messor* (Forsk.) (Grapsidae). *Hydrobiologia*. 319:15–21.

- Sukmaningrum T., Adji B.K., Pratiwi E.M., Larasati B., Sayekti P.R., Maulana I., Eprilurahman R. 2018. Diversity of crabs in the intertidal zone at Sundak Beach, Gunungkidul, Indonesia. :020066.
- Sutton P.G. 2009. The occurrence of the freshwater crab *Potamon fluviatile* (Decapoda: Brachyura) in Corfu. Mar. Biodivers. Rec. 2:e58.
- Takeda M., Miyake S. 1969. Crabs from the East China Sea. II : Addition to Brachygnatha Brachyrhyncha. Journal of the Faculty of Agriculture, Kyushu University. 15:449–468.
- Takeda S., Matsumasa M., Kikuchi S., Poovachiranon S., Murai M. 1996. Variation in the Branchial Formula of Semiterrestrial Crabs (Decapoda: Brachyura: Grapsidae and Ocypodidae) in Relation to Physiological Adaptations to the Environment. Journal of Crustacean Biology. 16:472.
- Takeda S., Murai M. 2004. Microhabitat Use by the Soldier Crab *Mictyris brevidactylus* (Brachyura: Mictyridae): Interchangeability of Surface and Subsurface Feeding through Burrow Structure Alteration. Journal of Crustacean Biology. 24:327–339.
- Thrupp T.J., Pope E.C., Whitten M.M.A., Bull J.C., Wootton E.C., Edwards M., Vogan C.L., Rowley A.F. 2015. Disease profiles of juvenile edible crabs (*Cancer pagurus* L.) differ at two geographically-close intertidal sites. Journal of Invertebrate Pathology. 128:1–5.
- Thurman C.L. 2002. Osmoregulation in six sympatric fiddler crabs (genus *Uca*) from the northwestern Gulf of Mexico. Marine Ecology. 23: 269-284.
- Tiralongo F., Messina G., Lombardo B.M. 2021. Invasive Species Control: Predation on the Alien Crab *Percnon gibbesi* (H. Milne Edwards, 1853) (Malacostraca: Percnidae) by the Rock Goby, *Gobius paganellus* Linnaeus, 1758 (Actinopterygii: Gobiidae). JMSE. 9:393.
- Tomikawa N., Watanabe S. 1992. Reproductive Ecology of the Xanthid Crab *Eriphia smithii* Mcleay. Journal of Crustacean Biology. 12:57–67.
- Trivedi J.N., Gadhavi M.K., Vachhrajani K.D. 2012. Diversity and habitat preference of brachyuran crabs in Gulf of Kutch, Gujarat, India. :11.
- Tsai J.-R., Lin H.-C. 2012. A Shift to an Ion Regulatory Role by Gills of a Semi-Terrestrial Crab,. Zoological Studies.:13.
- Tseng K.-Y., Tsai J.-R., Lin H.-C. 2022. A Multi-Species Comparison and Evolutionary Perspectives on Ion Regulation in the Antennal Gland of Brachyurans. Front. Physiol. 13:902937.
- Vannini M., Chelazzi G., Gherardi F. 1989. Feeding habits of the pebble crab *Eriphia smithi* (Crustacea, Brachyura, Menippidae). Marine Biology. 100:249–252.
- Vannini M., Gherardi F. 1988. Studies on the pebble crab, *Eriphia smithi* MacLeay 1838 (Xanthoidea Menippidae): patterns of relative growth and population structure. Tropical Zoology. 1:203–216.
- Venkatachari S.A.T., Vasantha N. 1981. Salinity tolerance and osmoregulation in the freshwater crab, *Barytelphusa guerini* (Milne Edwards). Hydrobiologia. 77:133–138.
- Vermeiren P., Abrantes K., Sheaves M. 2015. Generalist and Specialist Feeding Crabs Maintain Discrete Trophic Niches Within and Among Estuarine Locations. Estuaries and Coasts. 38:2070–2082.
- Vijaylaxmi J., Can A.A., Rivonker C.U. 2020. Population biology of some species of crabs along Goa, west coast of India. 49:8.
- Wada K., Kuroda M., Kamada M. 2005. Factors Influencing Coexistence of Two Brachyuran Crabs, *Helice tridens* and *Parasesarma plicatum*, in an Estuarine Salt Marsh, Japan. Journal of Crustacean Biology. 25:146–153.
- Wahyudi A.J., Wada S., Aoki M., Hama T. 2015. *Gaetice depressus* (Crustacea, Varunidae): Species profile and its role in organic carbon and nitrogen flow. Ocean Sci. J. 50:389–401.
- Waiho K., Fazhan H., Quintio E.T., Baylon J.C., Fujaya Y., Azmie G., Wu Q., Shi X., Ikhwanuddin M., Ma H. 2018. Larval rearing of mud crab (*Scylla*): What lies ahead. Aquaculture. 493:37–50.
- Walker J.B., Rinehart S.A., White W.K., Grosholz E.D., Long J.D. 2021. Local and regional variation in effects of burrowing crabs on plant community structure. Ecology. 102.
- Walton M.E., Le Vay L., Truong L.M., Ut V.N. 2006. Significance of mangrove–mudflat boundaries as nursery grounds for the mud crab, *Scylla paramamosain*. Mar Biol. 149:1199–1207.
- Wang Z., Bai Y., Zhang D., Tang B. 2018a. Adaptive evolution of osmoregulatory-related genes provides insight into salinity adaptation in Chinese mitten crab, *Eriocheir sinensis*. Genetica. 146:303–311.
- Wang Z., Wang Z., Shi X., Wu Q., Tao Y., Guo H., Ji C., Bai Y. 2018b. Complete mitochondrial genome of *Parasesarma affine* (Brachyura: Sesarmidae): Gene rearrangements in Sesarmidae and phylogenetic analysis of the Brachyura. International Journal of Biological Macromolecules. 118:31–40.
- Warren J. 1990. Role of burrows as refuges from sub-tidal predators of temperate mangrove crabs. Mar. Ecol. Prog. Ser. 67:295–299.

- Wear R.G., Fielder D.R. 1985. The marine fauna of New Zealand: larvae of the Brachyura (Crustacea, Decapoda). Wellington: New Zealand Dept. of Scientific and Industrial Research.
- Wehrtmann I.S., Magalhães C., Hernáez P., Mantelatto F.L. 2010. Offspring production in three freshwater crab species (Brachyura: Pseudothelphusidae) from the Amazon region and Central America. *Zoologia (Curitiba, Impr.)*. 27:965–972.
- Wehrtmann I.S., Magalhães C., Orozco M.N. 2016. The primary freshwater crabs of Guatemala (Decapoda: Brachyura: Pseudothelphusidae), with comments on their conservation status. *Journal of Crustacean Biology*. 36:776–784.
- Weiss M., Thatje S., Heilmayer O., Anger K., Brey T., Keller M. 2009. Influence of temperature on the larval development of the edible crab, *Cancer pagurus*. *J. Mar. Biol. Ass.* 89:753–759.
- Wilson B.M., Pohle G.W. 2016. Northern range expansion of the American talon crab, *Euchiropsus americanus* A. Milne-Edwards, 1880 (Decapoda, Grapsoidea, Plagusidae), to the Bay of Fundy, Canada. *Crustac.* 89:163–173.
- Woll A. 2003. In situ observations of ovigerous *Cancer pagurus* Linnaeus, 1758 in Norwegian waters (Brachyura, Cancridae). *Crustac.* 76:469–478.
- Wong K.J.H., Tao L.S.R., Leung K.M.Y. 2021. Subtidal crabs of Hong Kong: Brachyura (Crustacea: Decapoda) from benthic trawl surveys conducted by the University of Hong Kong, 2012 to 2018. *Regional Studies in Marine Science*. 48:102013.
- Worham J.L., Pascual S. 2017. Grooming behaviors and gill fouling in the commercially important blue crab (*Callinectes sapidus*) and stone crab (*Menippe mercenaria*). *Nauplius*. 25.
- Yeo D.C.J., Cai Y., Ng P.K.L. 1999. The freshwater and terrestrial decapod crustacea of Pulau Tioman, Peninsular Malaysia. *Raffles Bulletin of Zoology*:48.
- Yeo D.C.J., Ng P.K.L., Cumberlidge N., Magalhães C., Daniels S.R., Campos M.R. 2008. Global diversity of crabs (Crustacea: Decapoda: Brachyura) in freshwater. *Hydrobiologia*. 595:275–286.
- Young A.M., Elliott J.A. 2020. Life History and Population Dynamics of Green Crabs (*Carcinus maenas*). *Fishes*. 5:44.
- Zalota A.K., Spiridonov V.A., Kolyuchkina G.A. 2016. In situ observations and census of invasive mud crab *Rhithropanopeus harrisi* (Crustacea: Decapoda: Panopeidae) applied in the Black Sea and the Sea of Azov. *Arthropoda Selecta*. 25:39062–0.
- Zenone A., Badalamenti F., Giacalone V.M., Musco L., Pipitone C., Vega Fernández T., D’Anna G. 2017. Substrate preference and settlement behaviour of the megalopa of the invasive crab *Percnon gibbesi* (Decapoda, Percnidae) in the Mediterranean Sea. *Helgol Mar Res*. 70:21.
- Zhang D., Liu J., Qi T., Ge B., Liu Q., Jiang S., Zhang H., Wang Z., Ding G., Tang B. 2018. Comparative transcriptome analysis of *Eriocheir japonica sinensis* response to environmental salinity. *PLoS ONE*. 13:e0203280.
- Zimmermann B.L., Aued A.W., Machado S., Manfio D., Scarton L.P., Santos S. 2009. Behavioral repertory of *Trichodactylus panoplus* (Crustacea: Trichodactylidae) under laboratory conditions. *Zoologia (Curitiba, Impr.)*. 26:5–11.

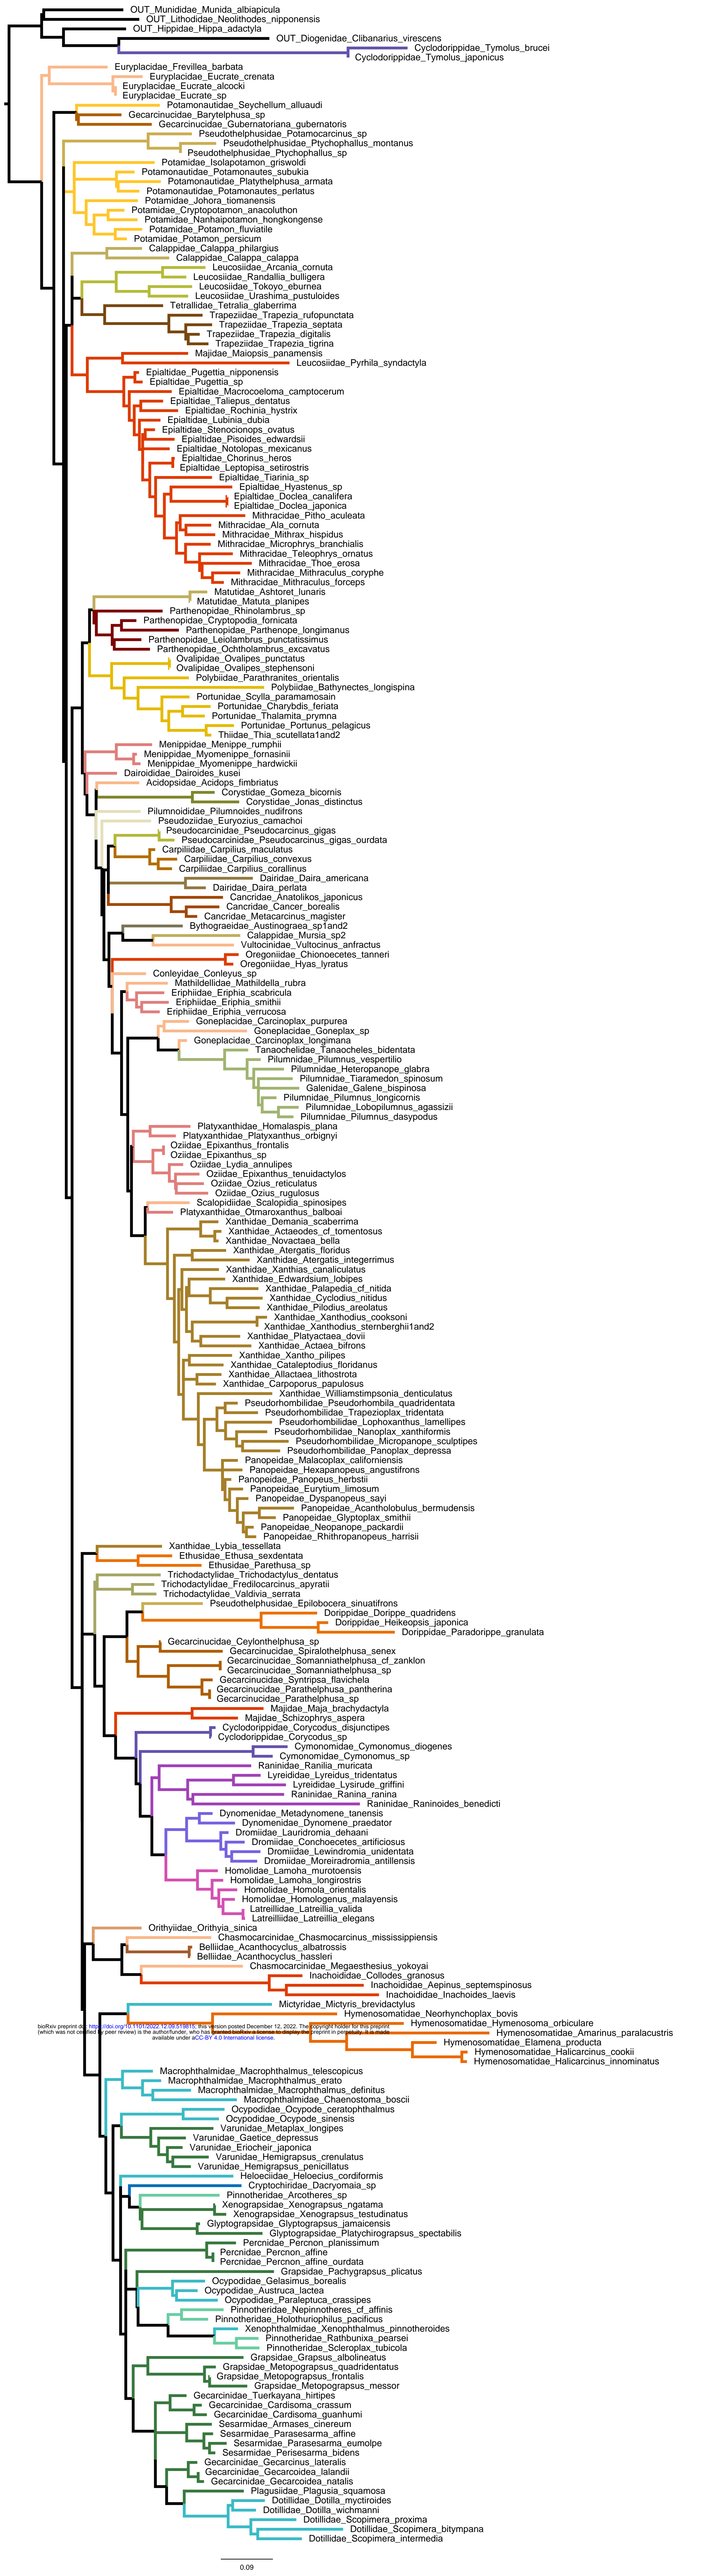



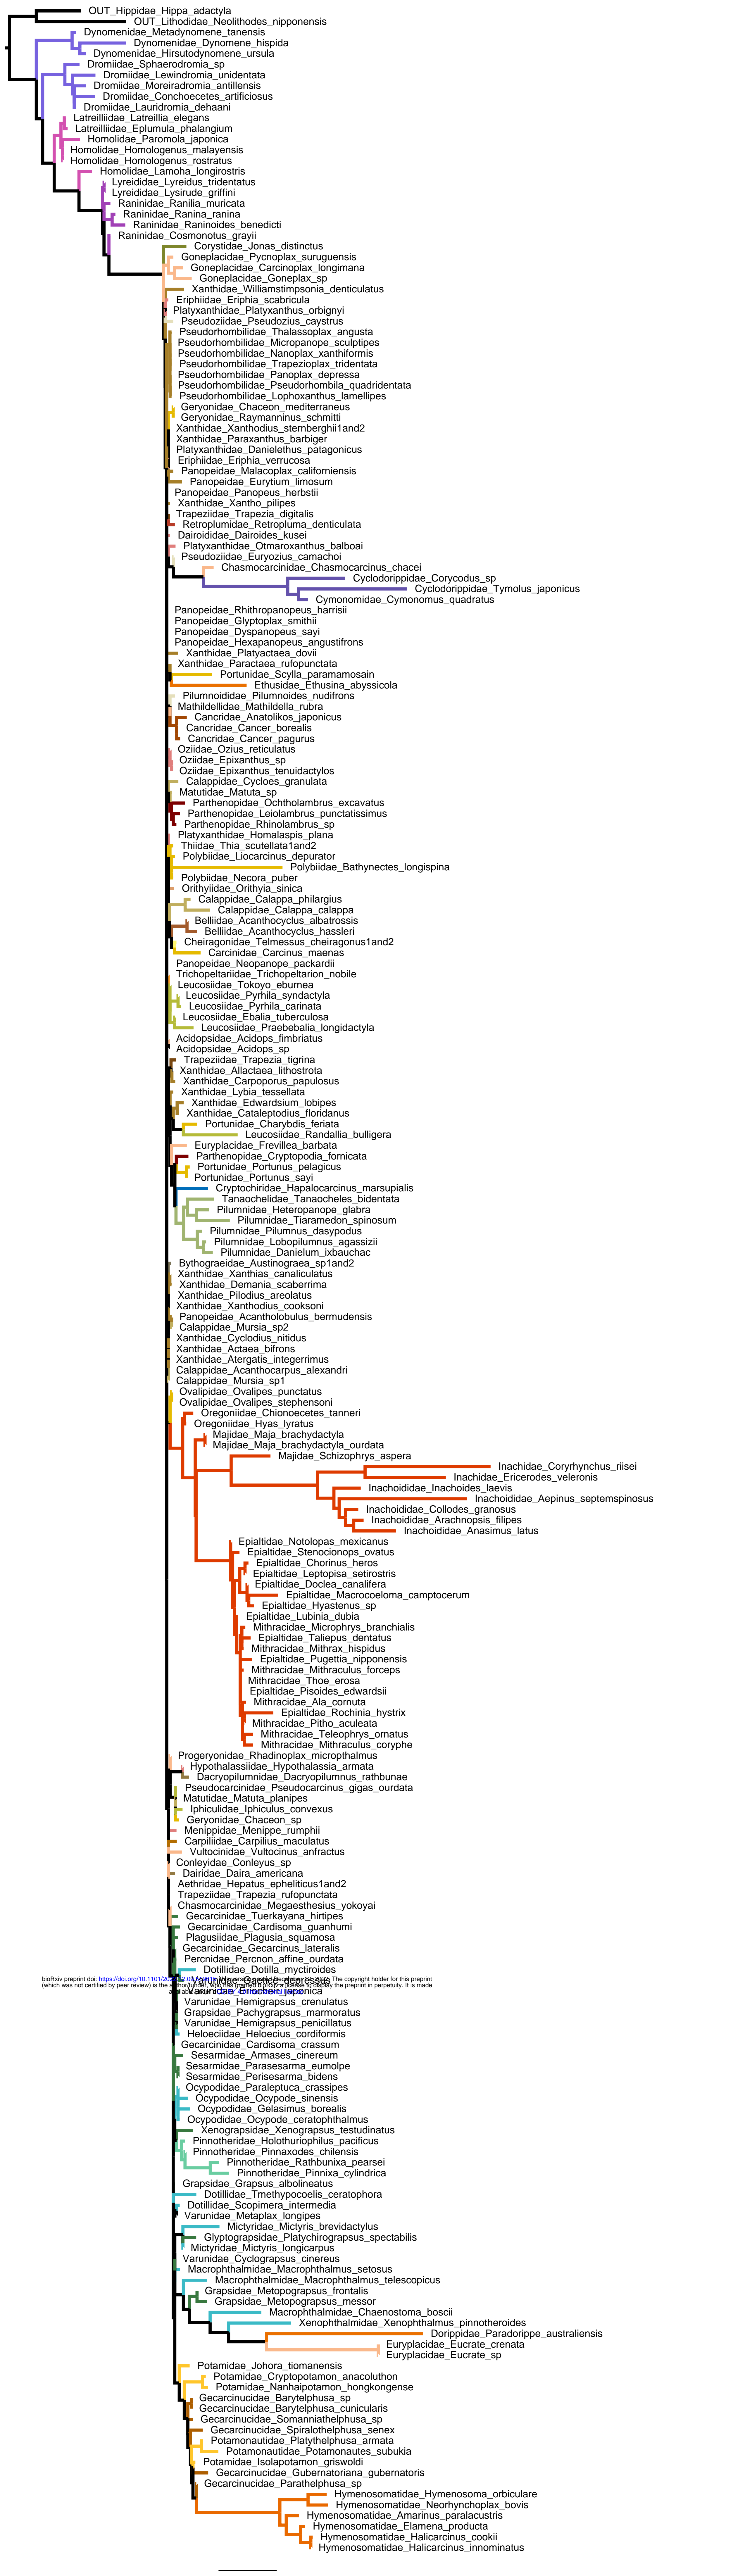



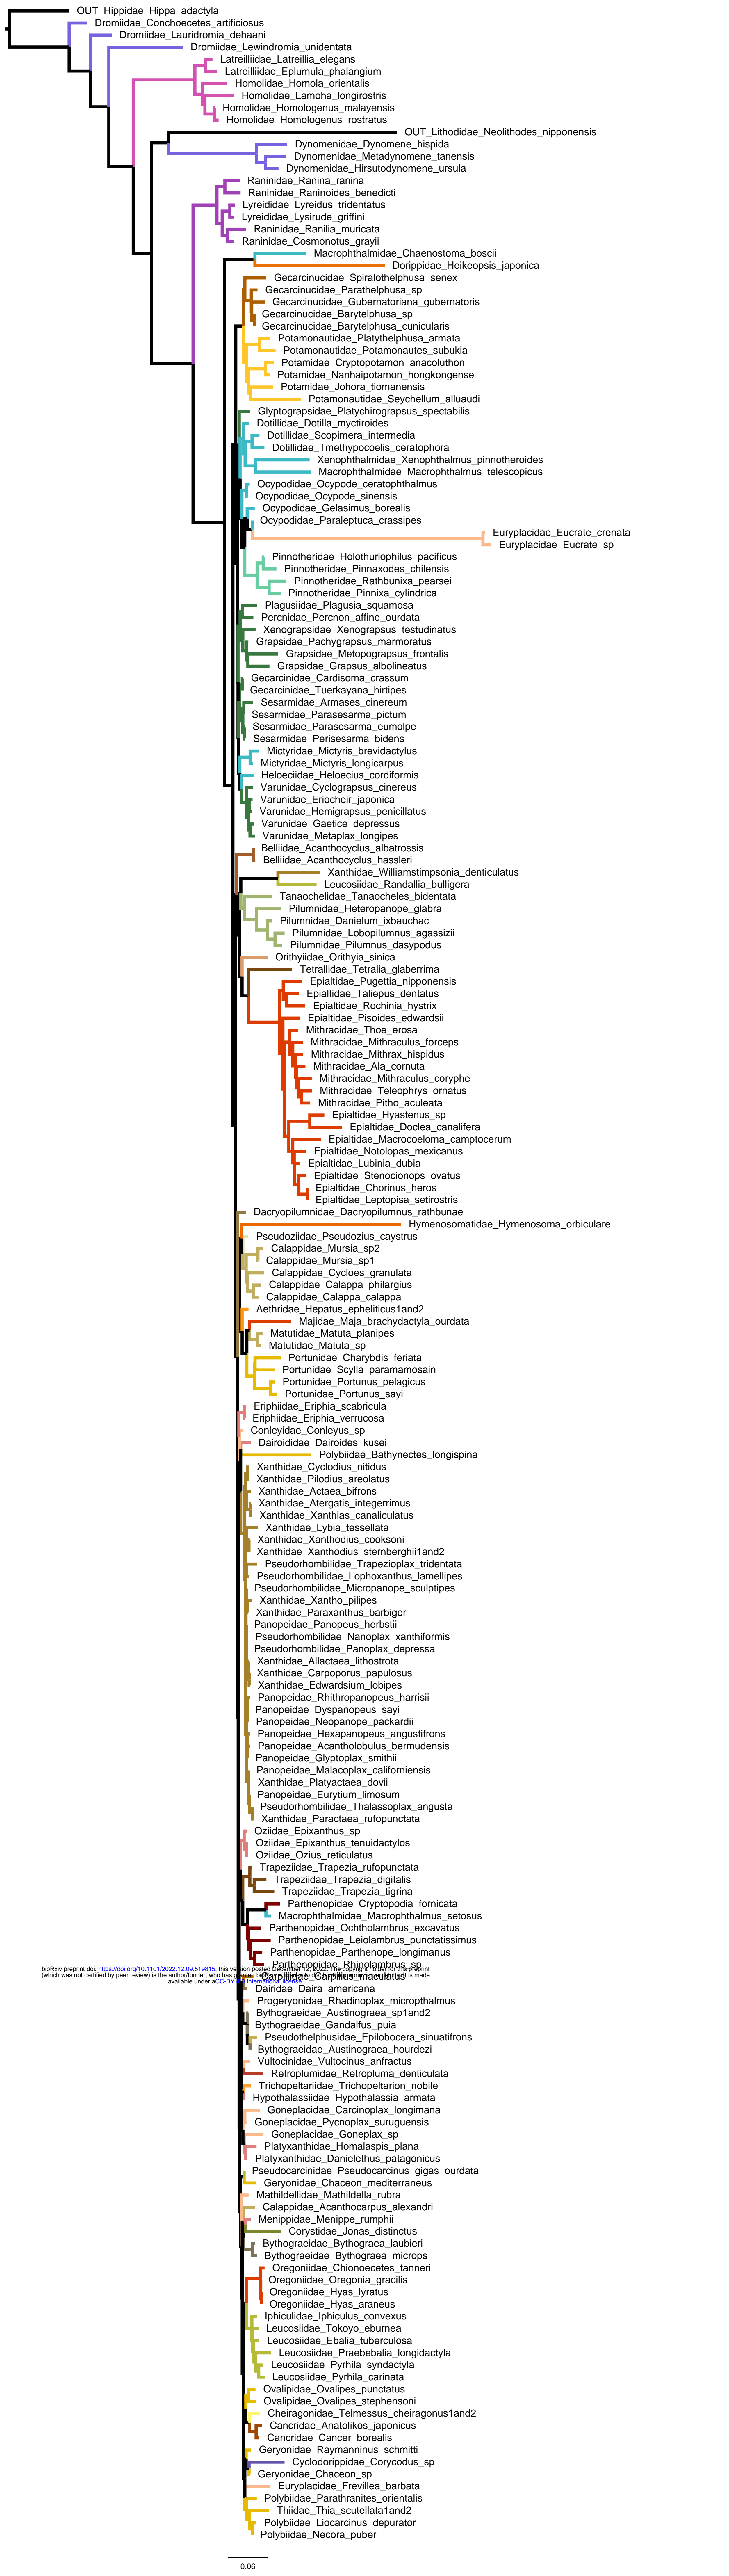

bioRxiv preprint doi: <https://doi.org/10.1101/2022.12.09.519815>; this version posted December 12, 2022. The copyright holder for this preprint (which was not certified by peer review) is the author/funder, who has granted bioRxiv a license to display the preprint in perpetuity. It is made available under aCC-BY 4.0 International license.

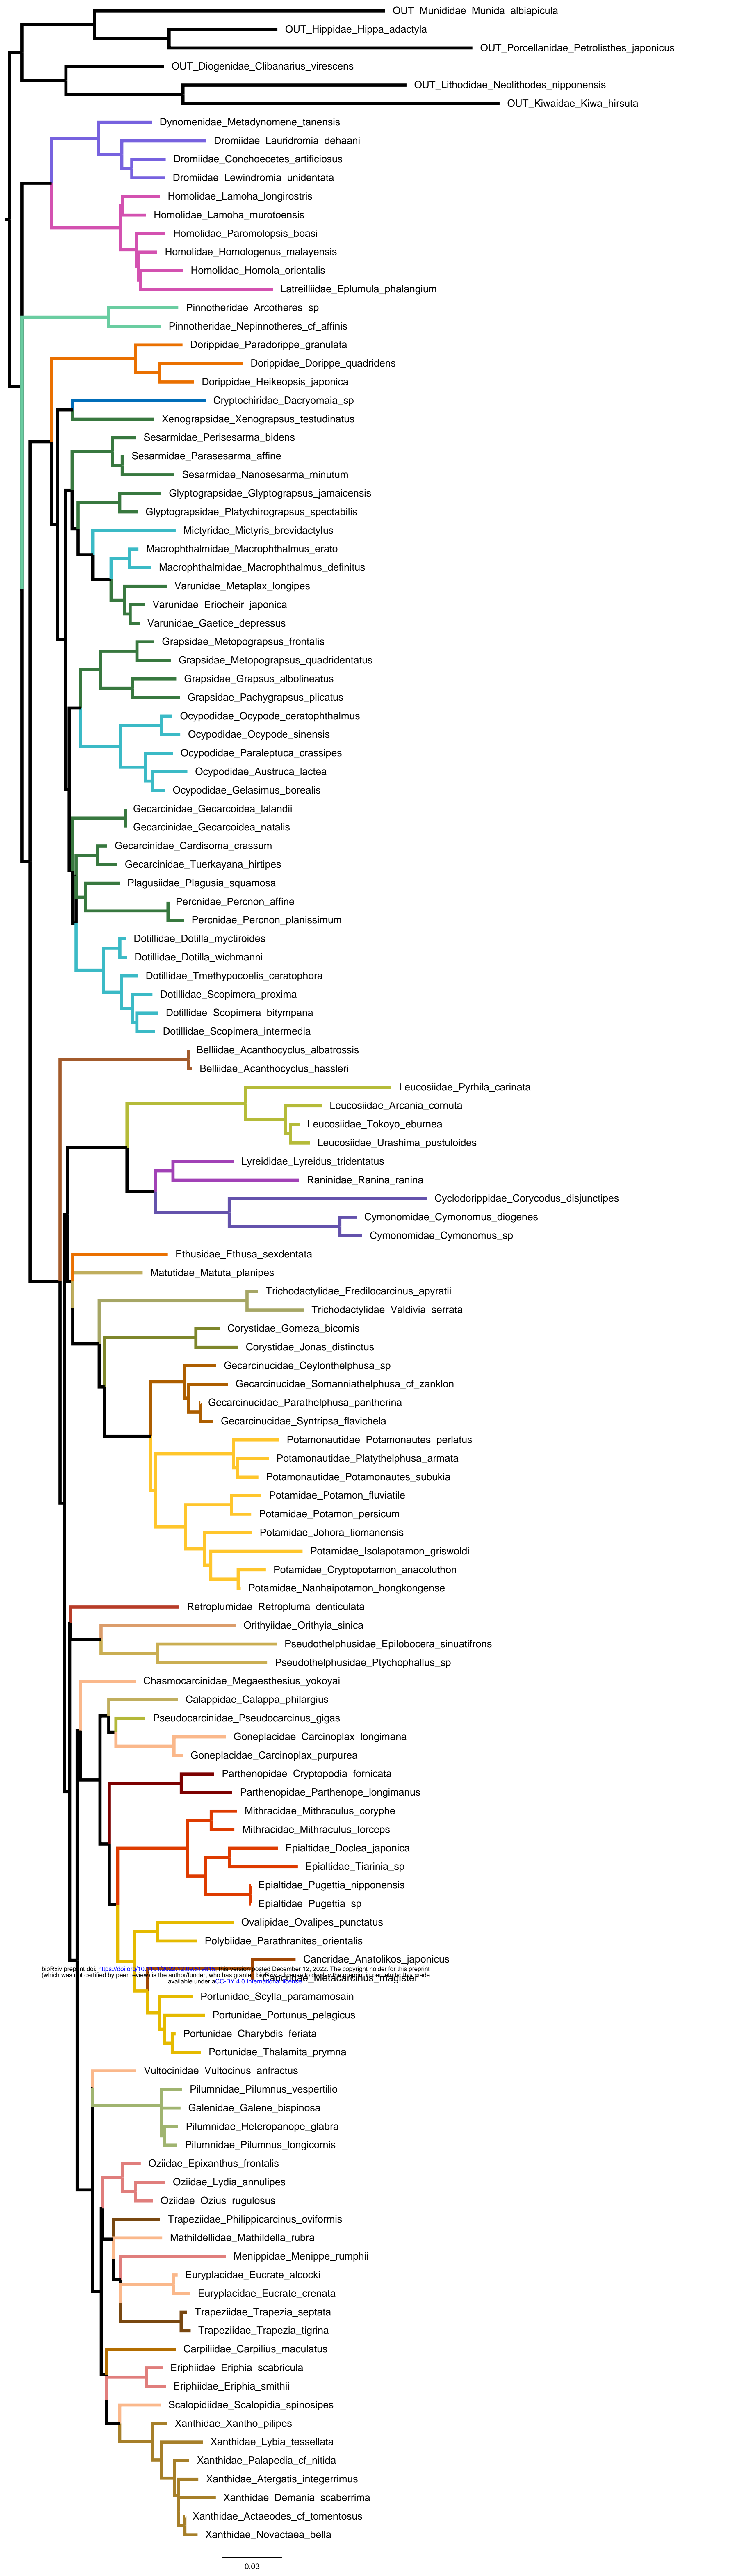

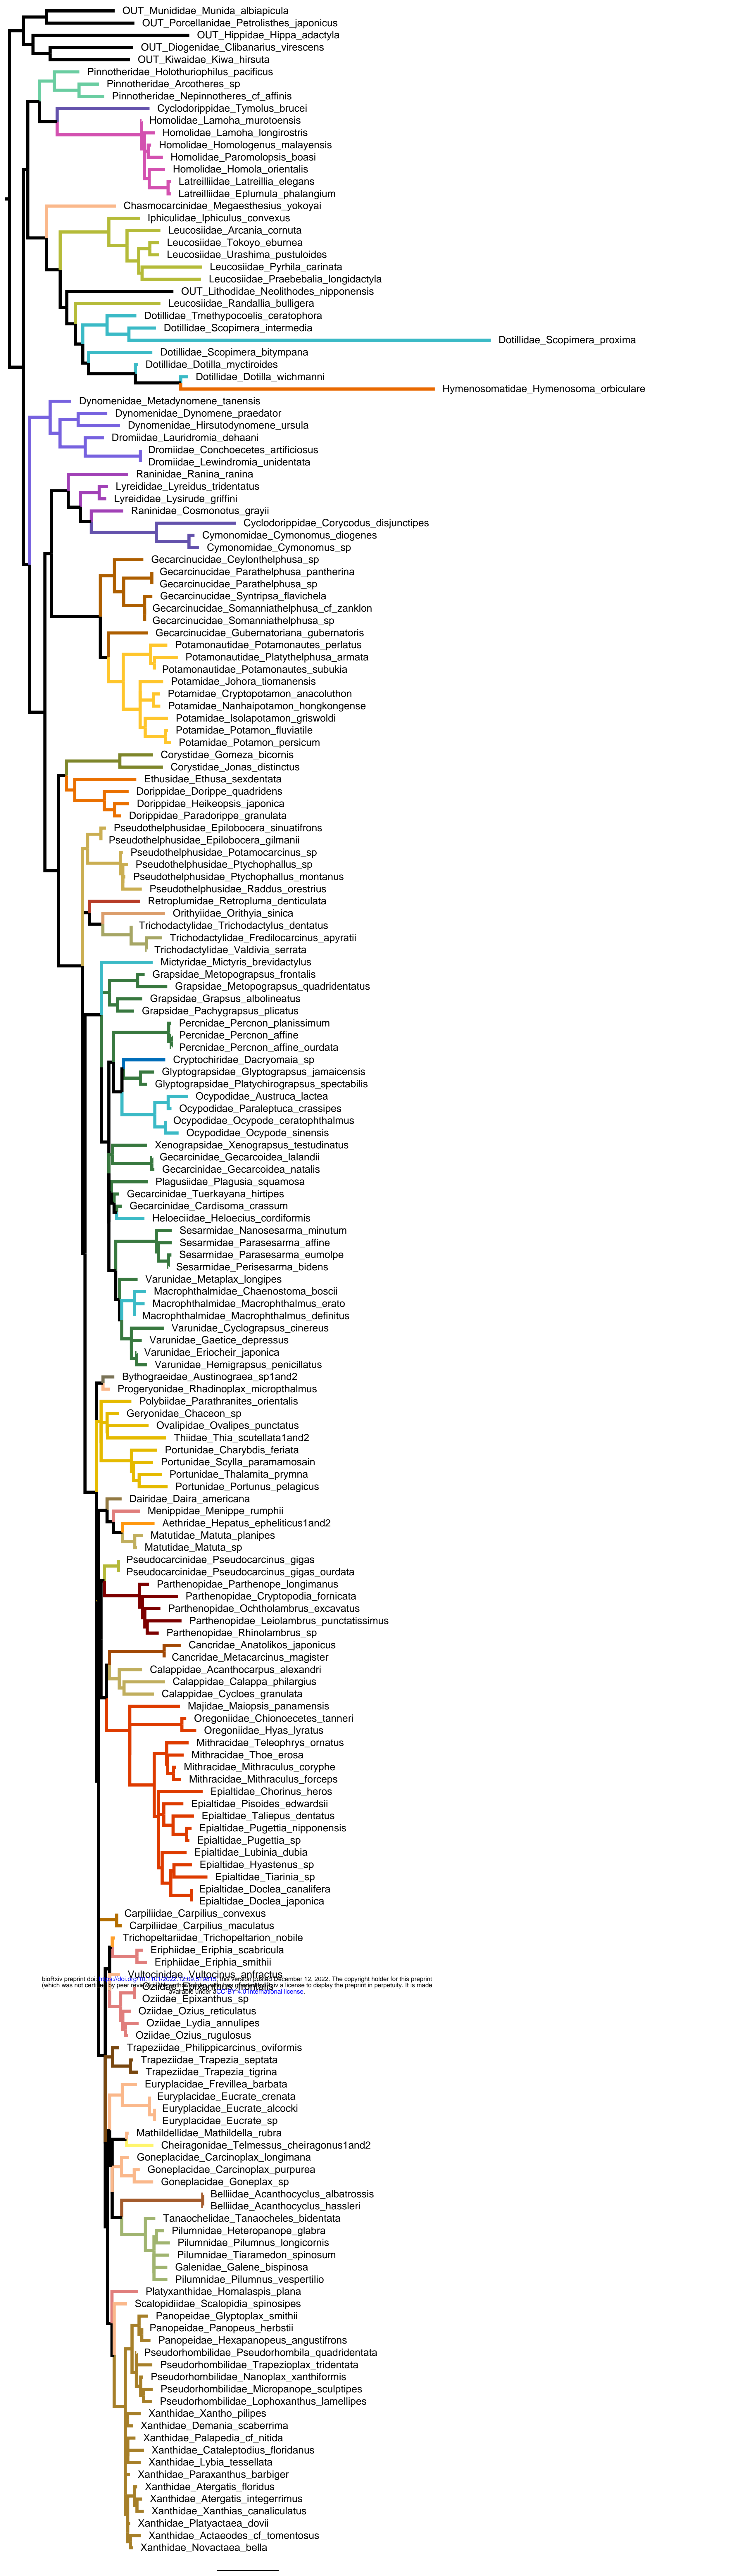

bioRxiv preprint doi: <https://doi.org/10.1101/2022.11.12.509131>; this version posted November 12, 2022. The copyright holder for this preprint (which was not certified by peer review) is the author/funder, who has granted bioRxiv a license to display the preprint in perpetuity. It is made available under aCC-BY 4.0 International license.

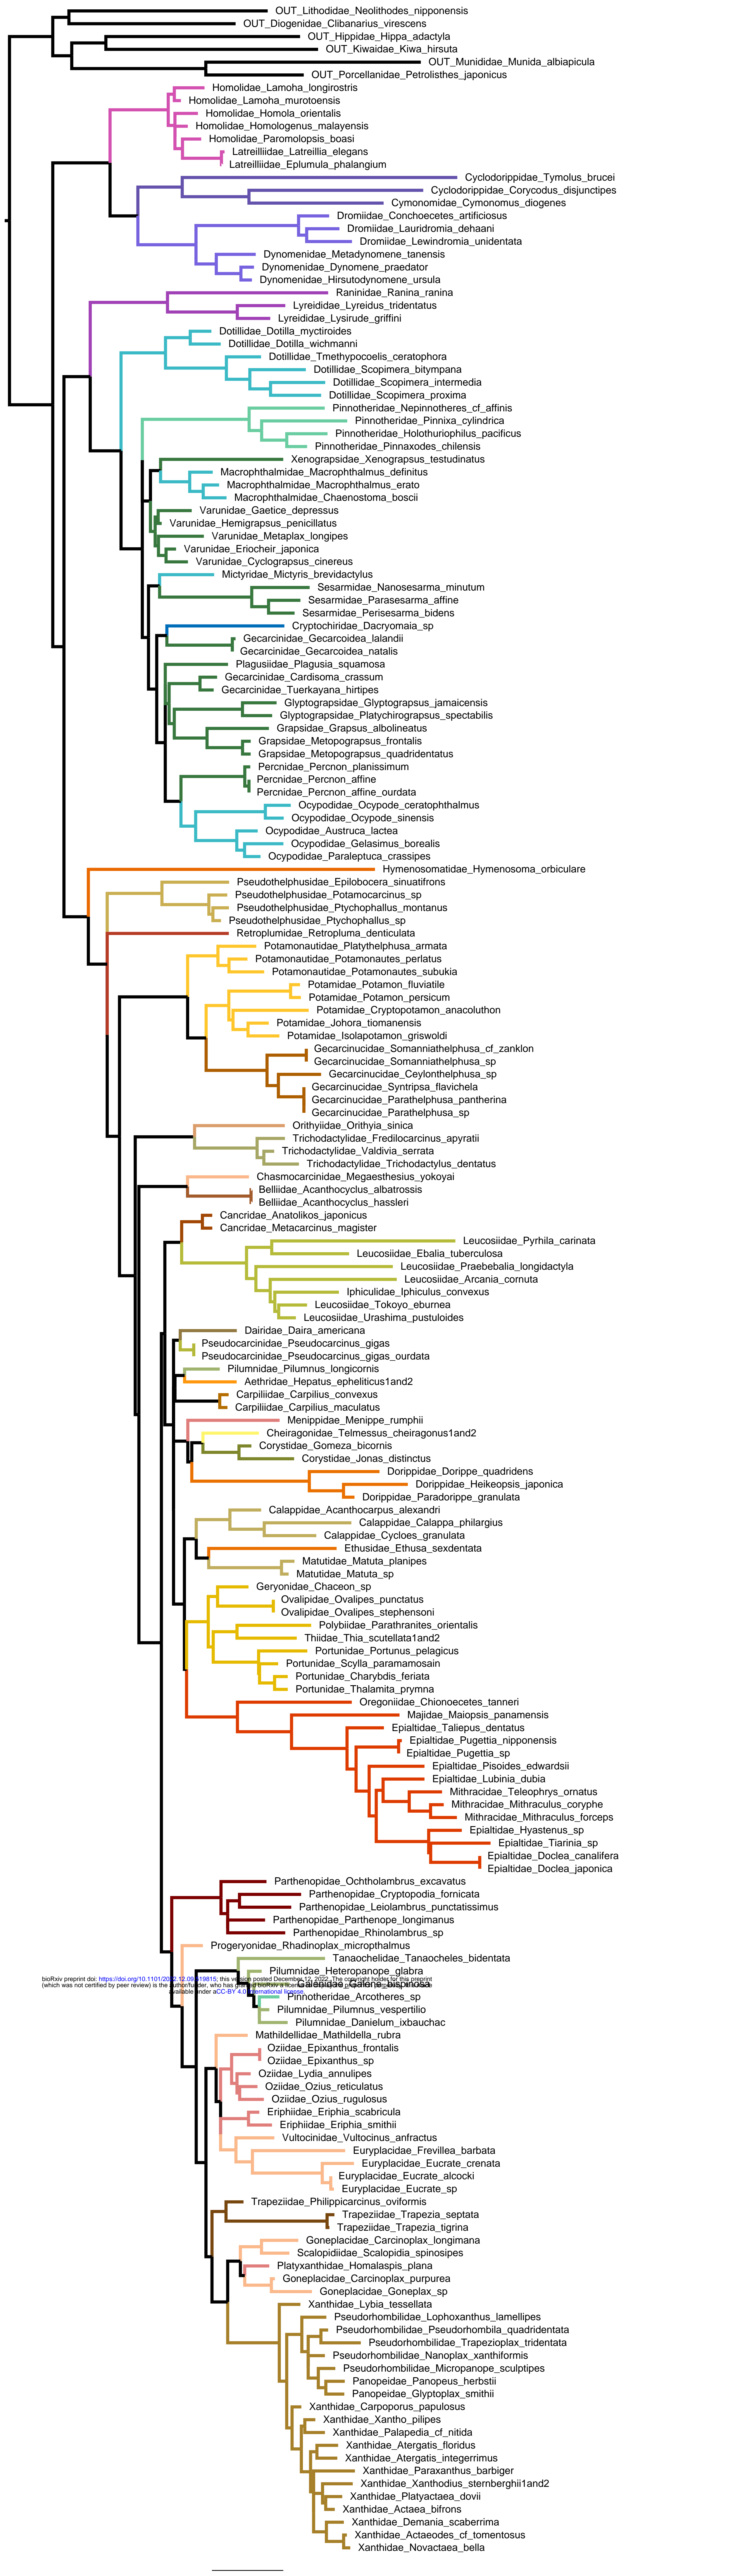

bioRxiv preprint doi: <https://doi.org/10.1101/2022.12.09.519815>; this version posted December 12, 2022. The copyright holder for this preprint (which was not certified by peer review) is the author/funder, who has granted bioRxiv a license to display the preprint in perpetuity. It is made available under aCC-BY 4.0 International license.

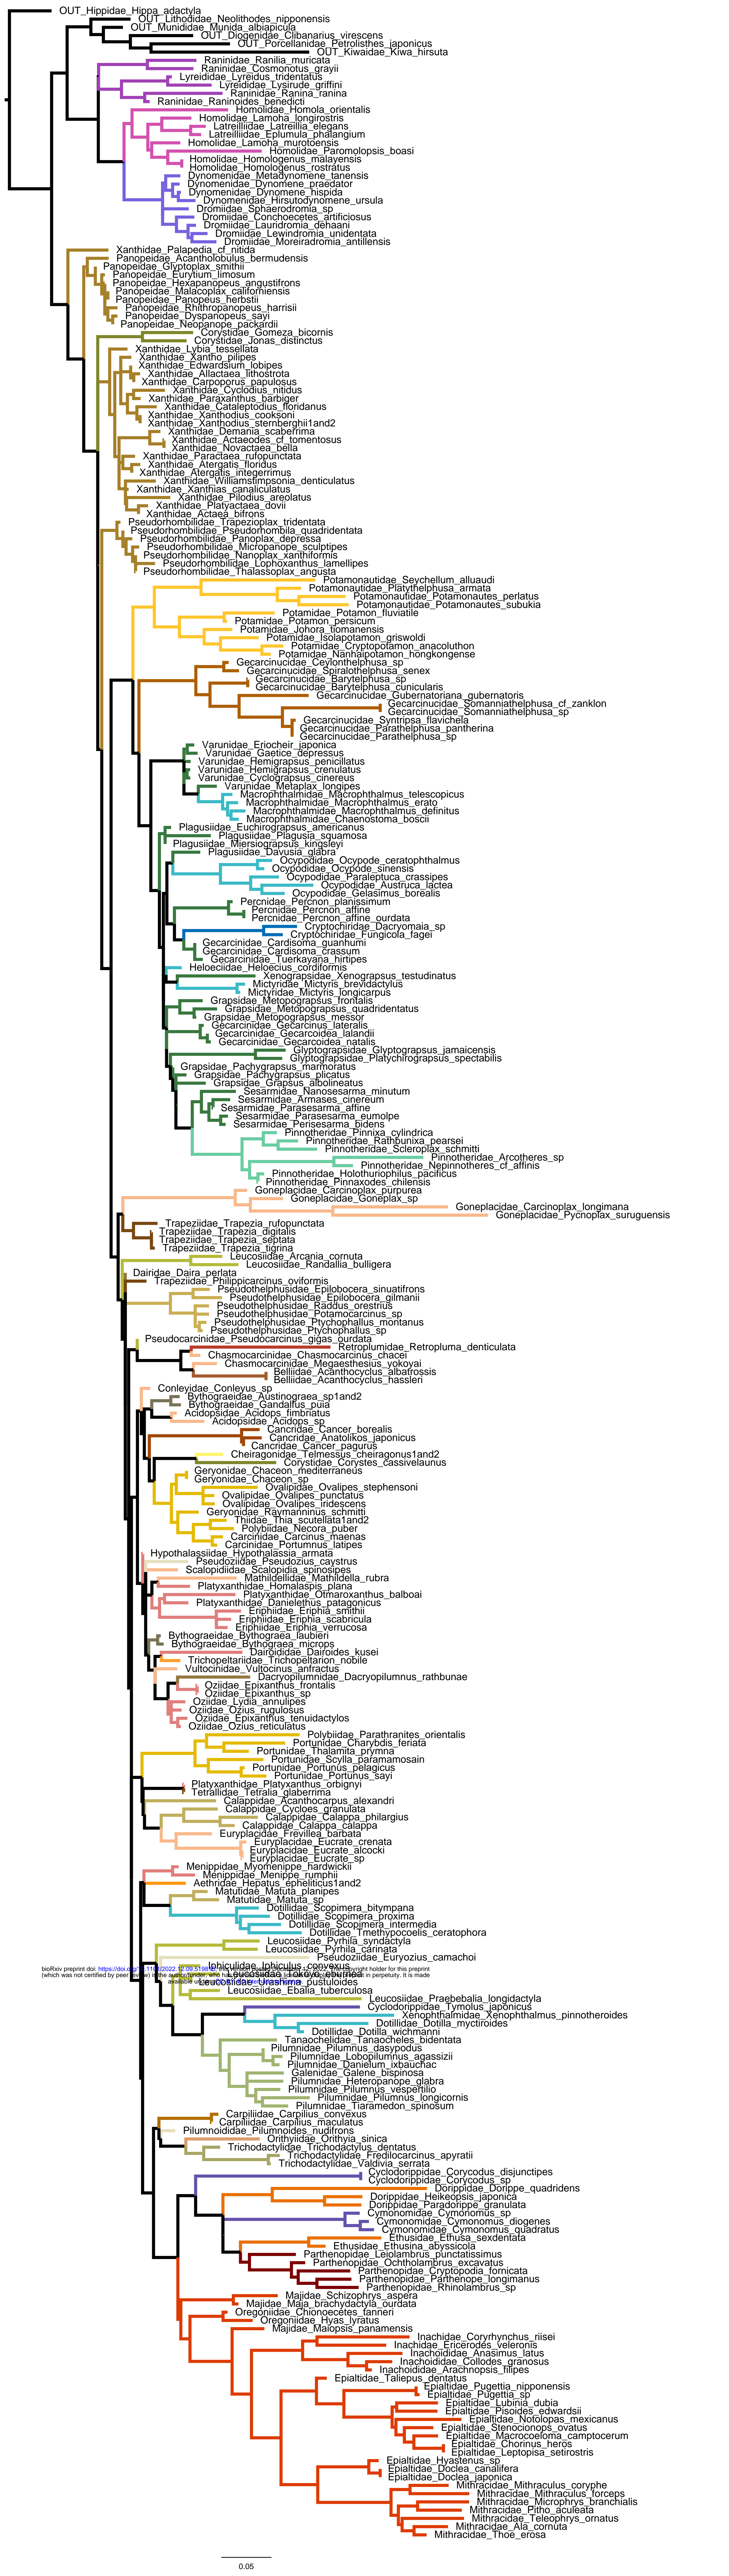

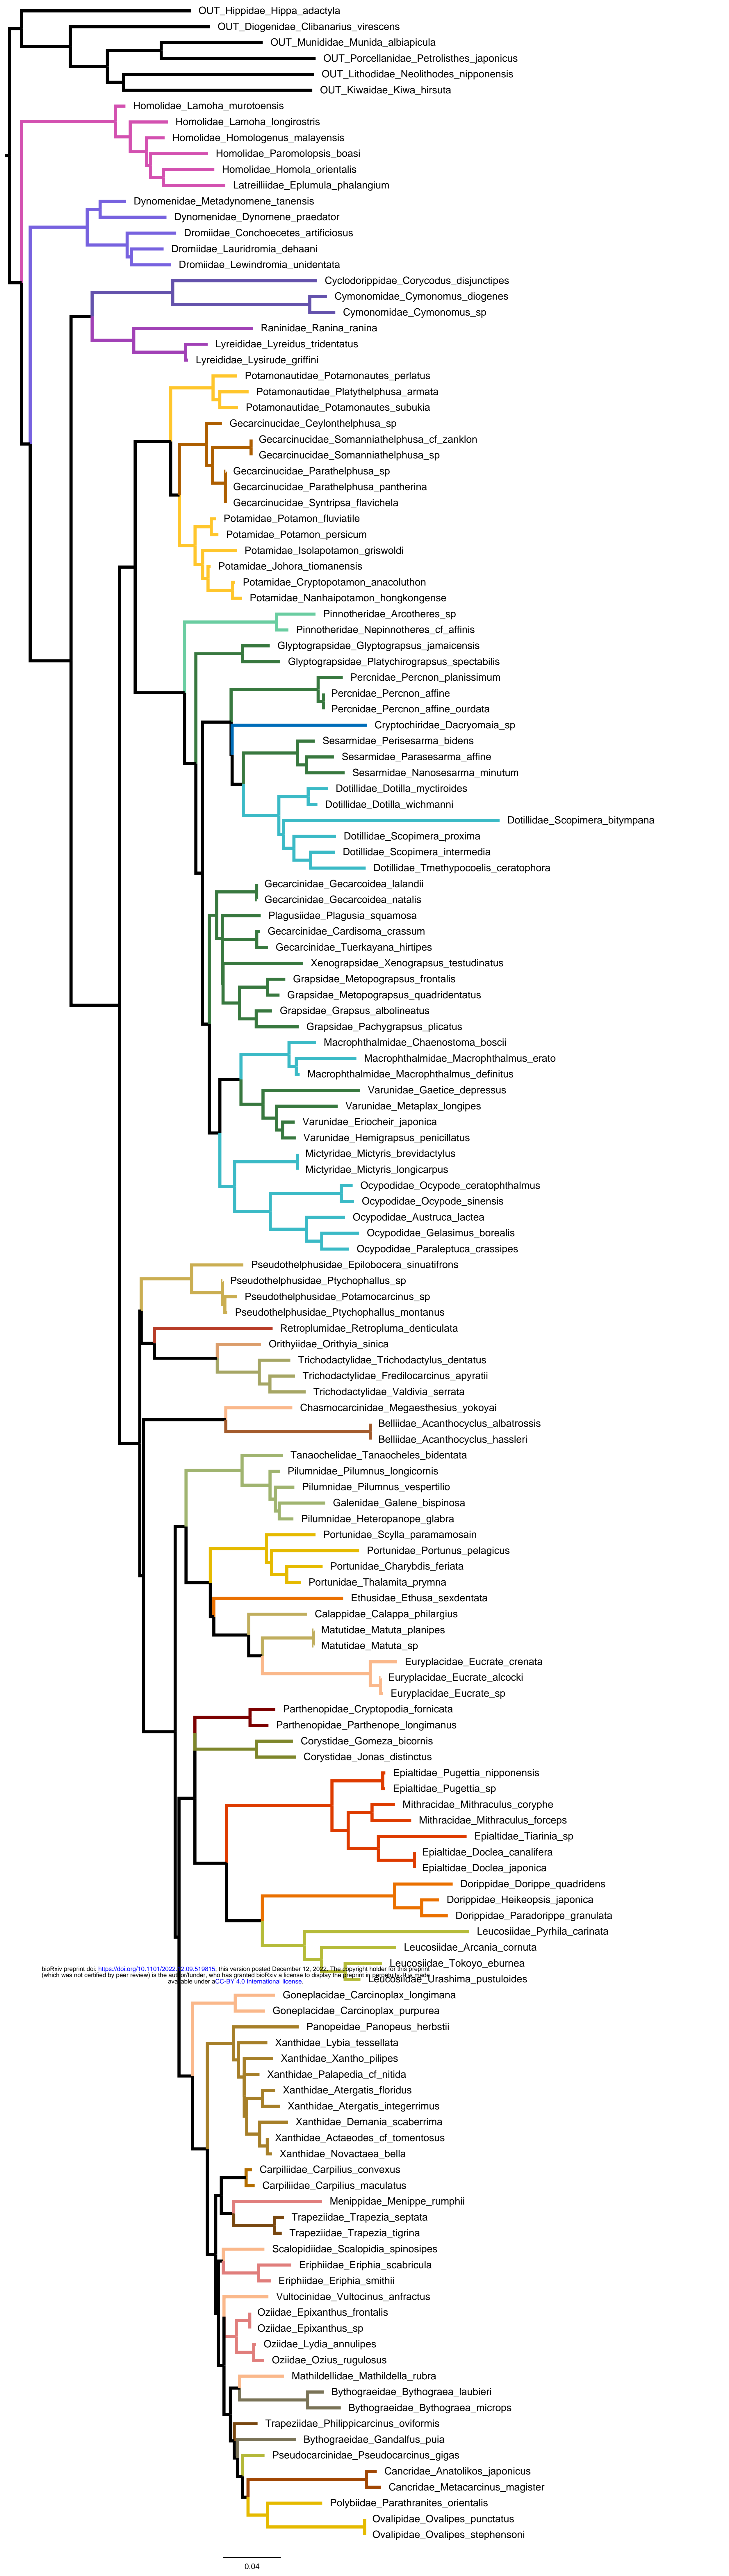

bioRxiv preprint doi: <https://doi.org/10.1101/2022.12.09.519815>; this version posted December 12, 2022. The copyright holder for this preprint (which was not certified by peer review) is the author/funder, who has granted bioRxiv a license to display the preprint in perpetuity. It is made available under aCC-BY 4.0 International license.

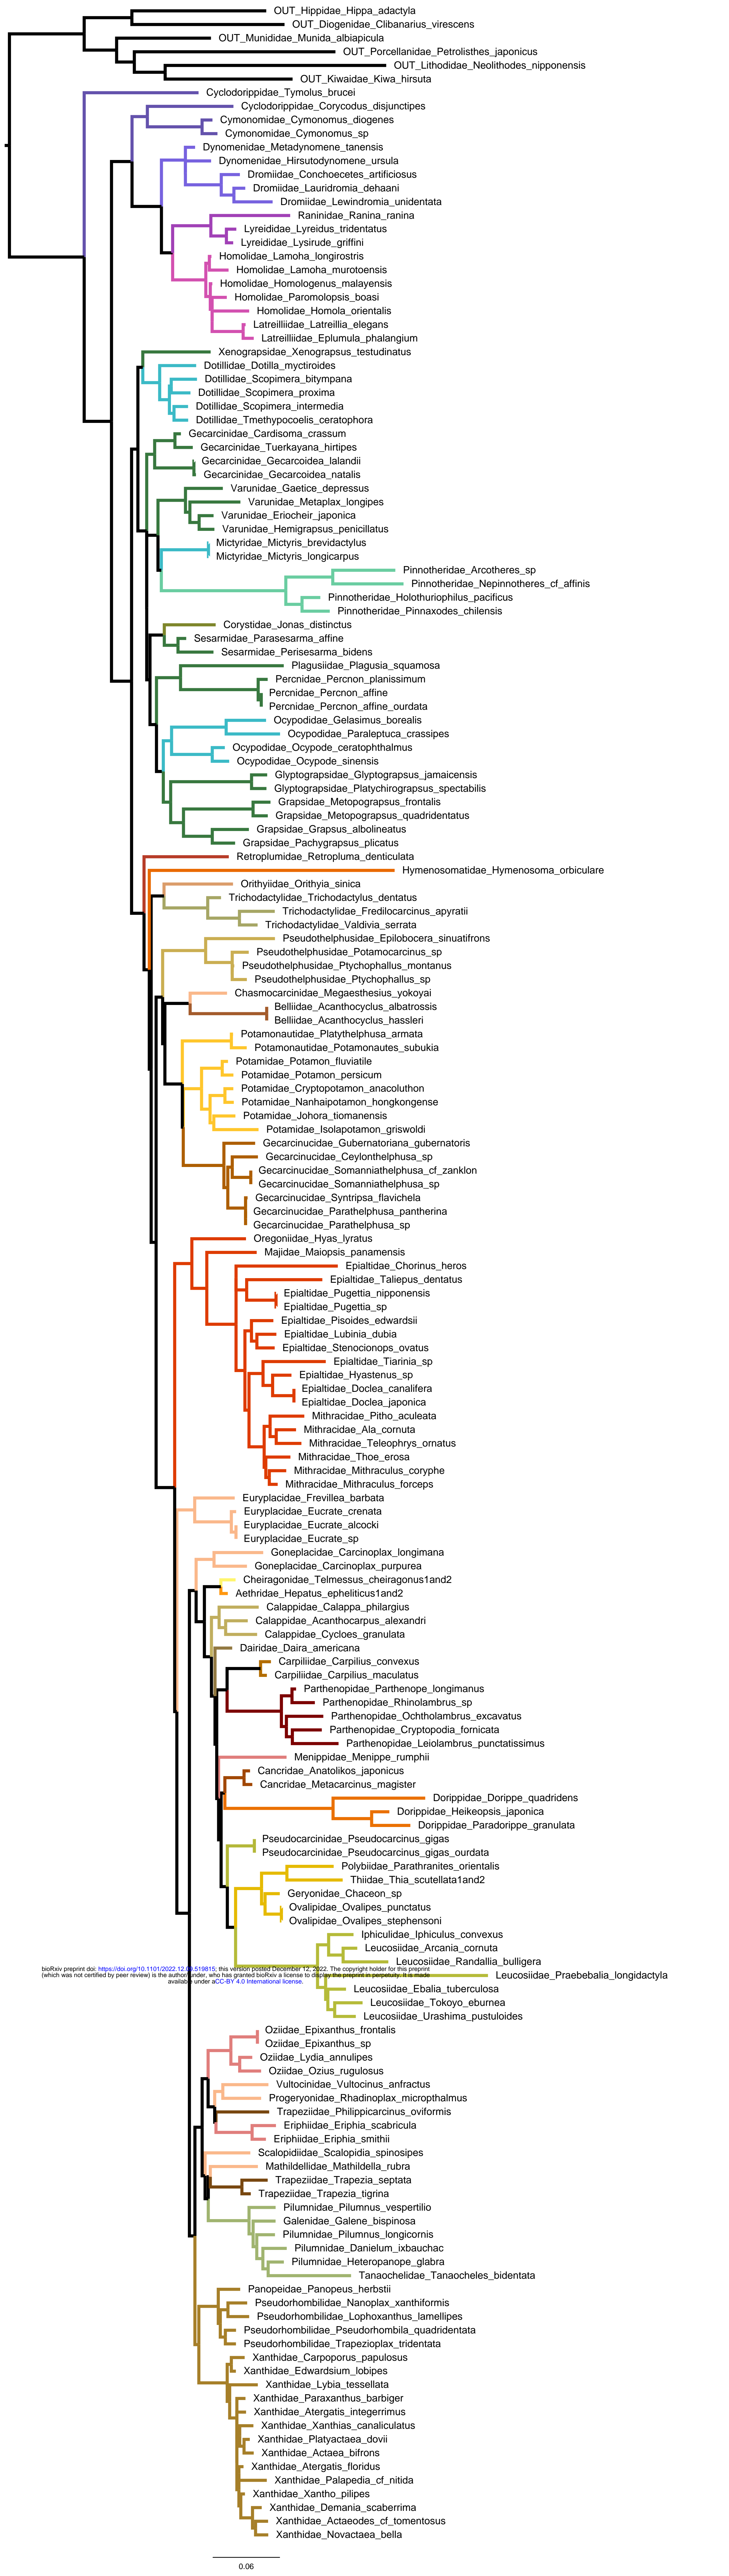

bioRxiv preprint doi: <https://doi.org/10.1101/2022.12.09.519815>; this version posted December 12, 2022. The copyright holder for this preprint (which was not certified by peer review) is the author/funder, who has granted bioRxiv a license to display the preprint in perpetuity. It is made available under aCC-BY 4.0 International license.

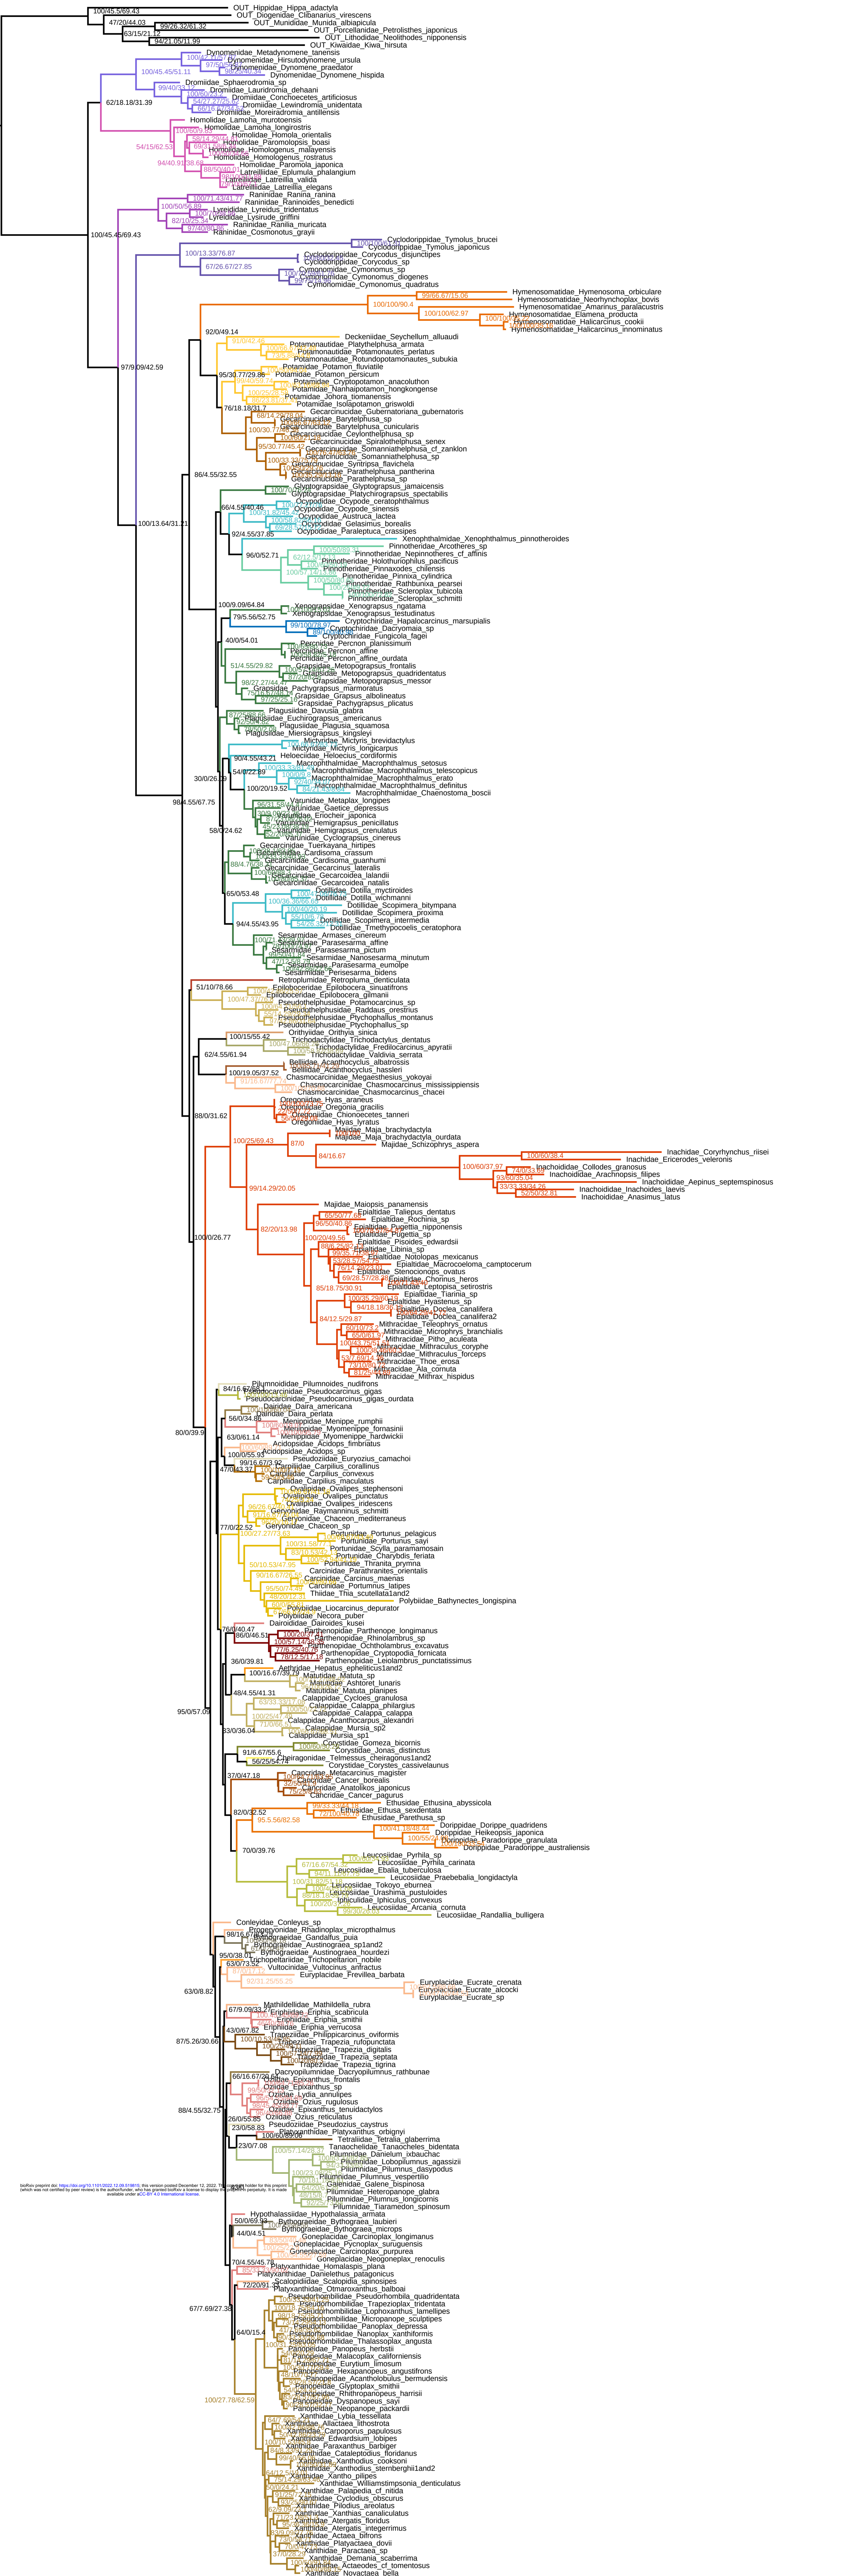

bioRxiv preprint doi: <https://doi.org/10.1101/2022.12.09.519816>; this version posted December 12, 2022. The copyright holder for this preprint (which was not certified by peer review) is the author/funder, who has granted bioRxiv a license to display the preprint in perpetuity. It is made available under aCC-BY 4.0 International license.



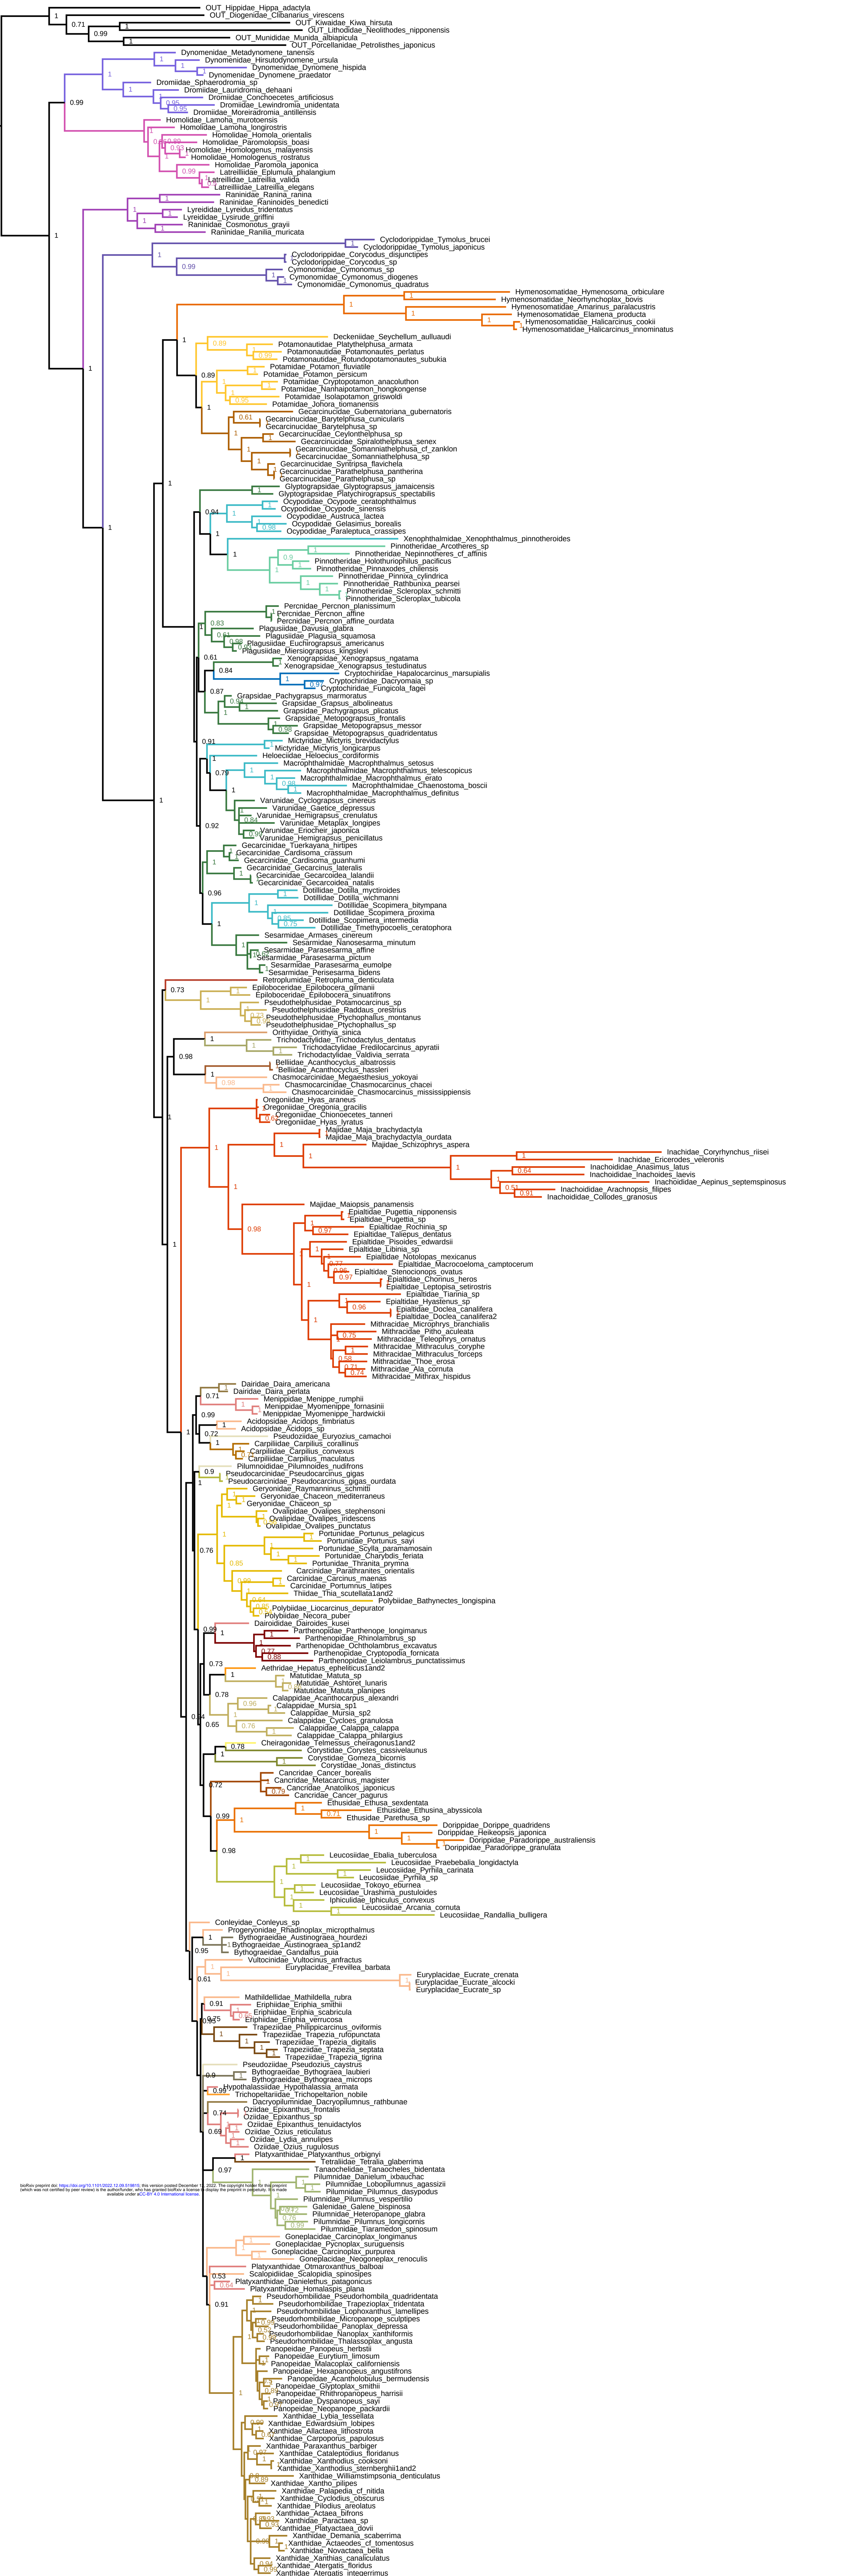

bioRxiv preprint doi: <https://doi.org/10.1101/2022.12.09.519810>; this version posted December 11, 2022. The copyright holder for this preprint (which was not certified by peer review) is the author/funder, who has granted bioRxiv a license to display the preprint in perpetuity. It is made available under aCC-BY 4.0 International license.

**A**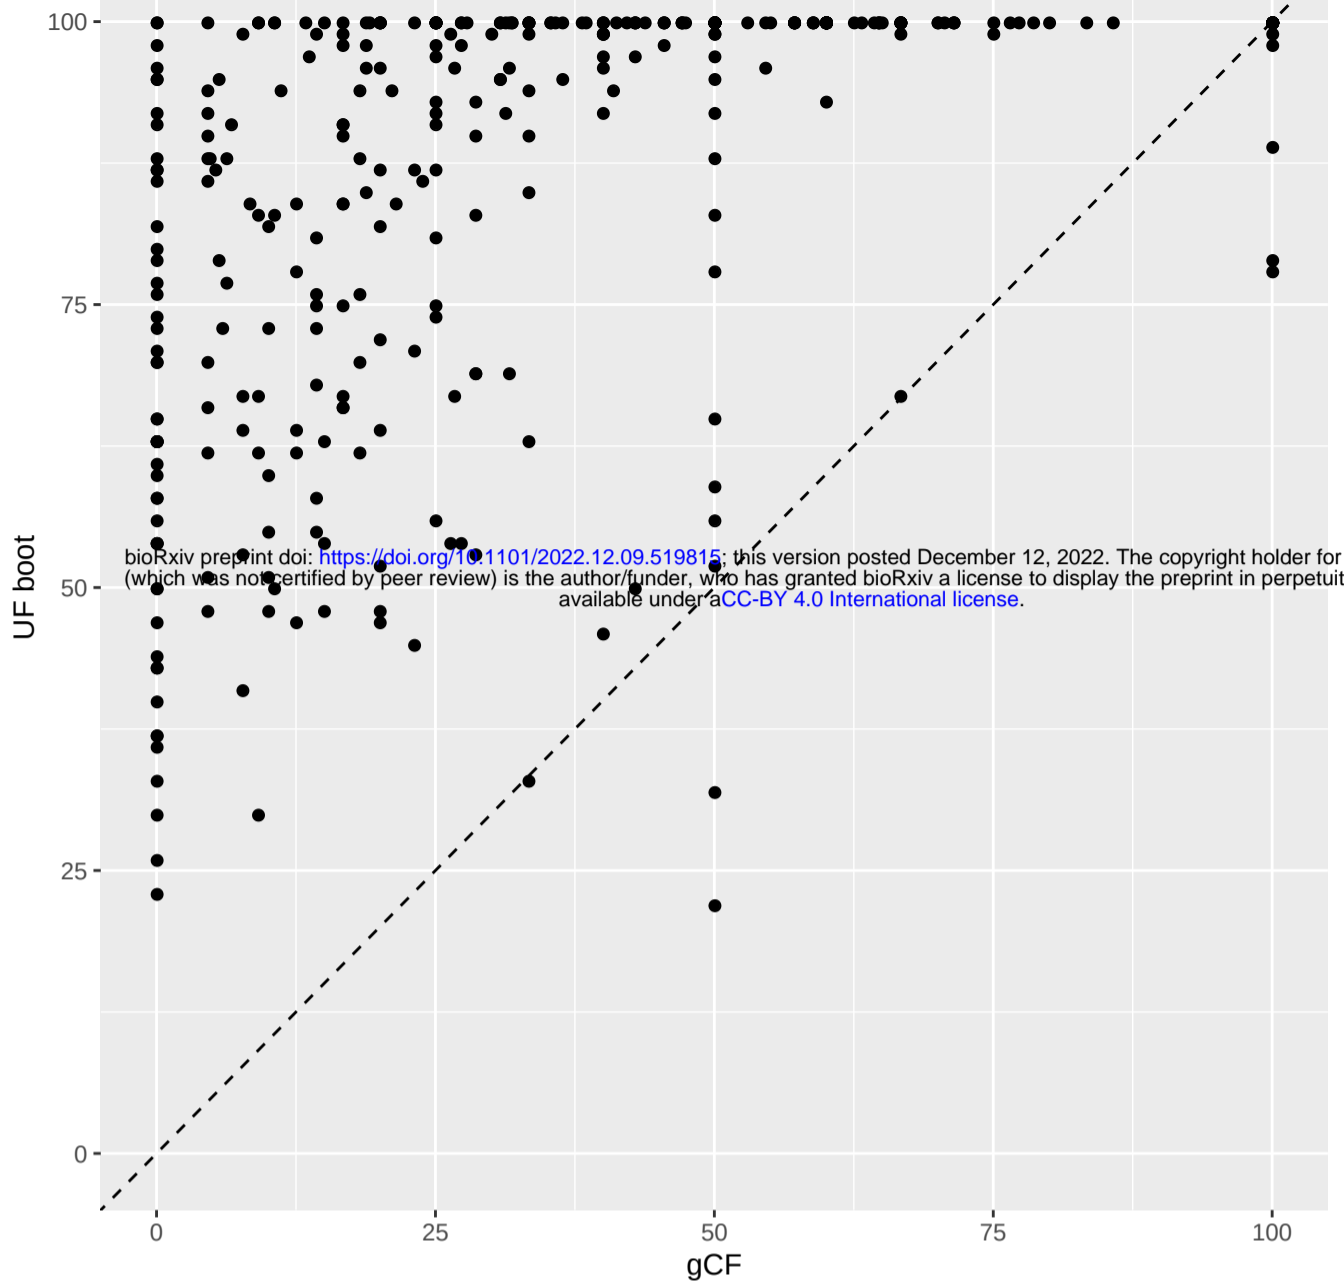**B**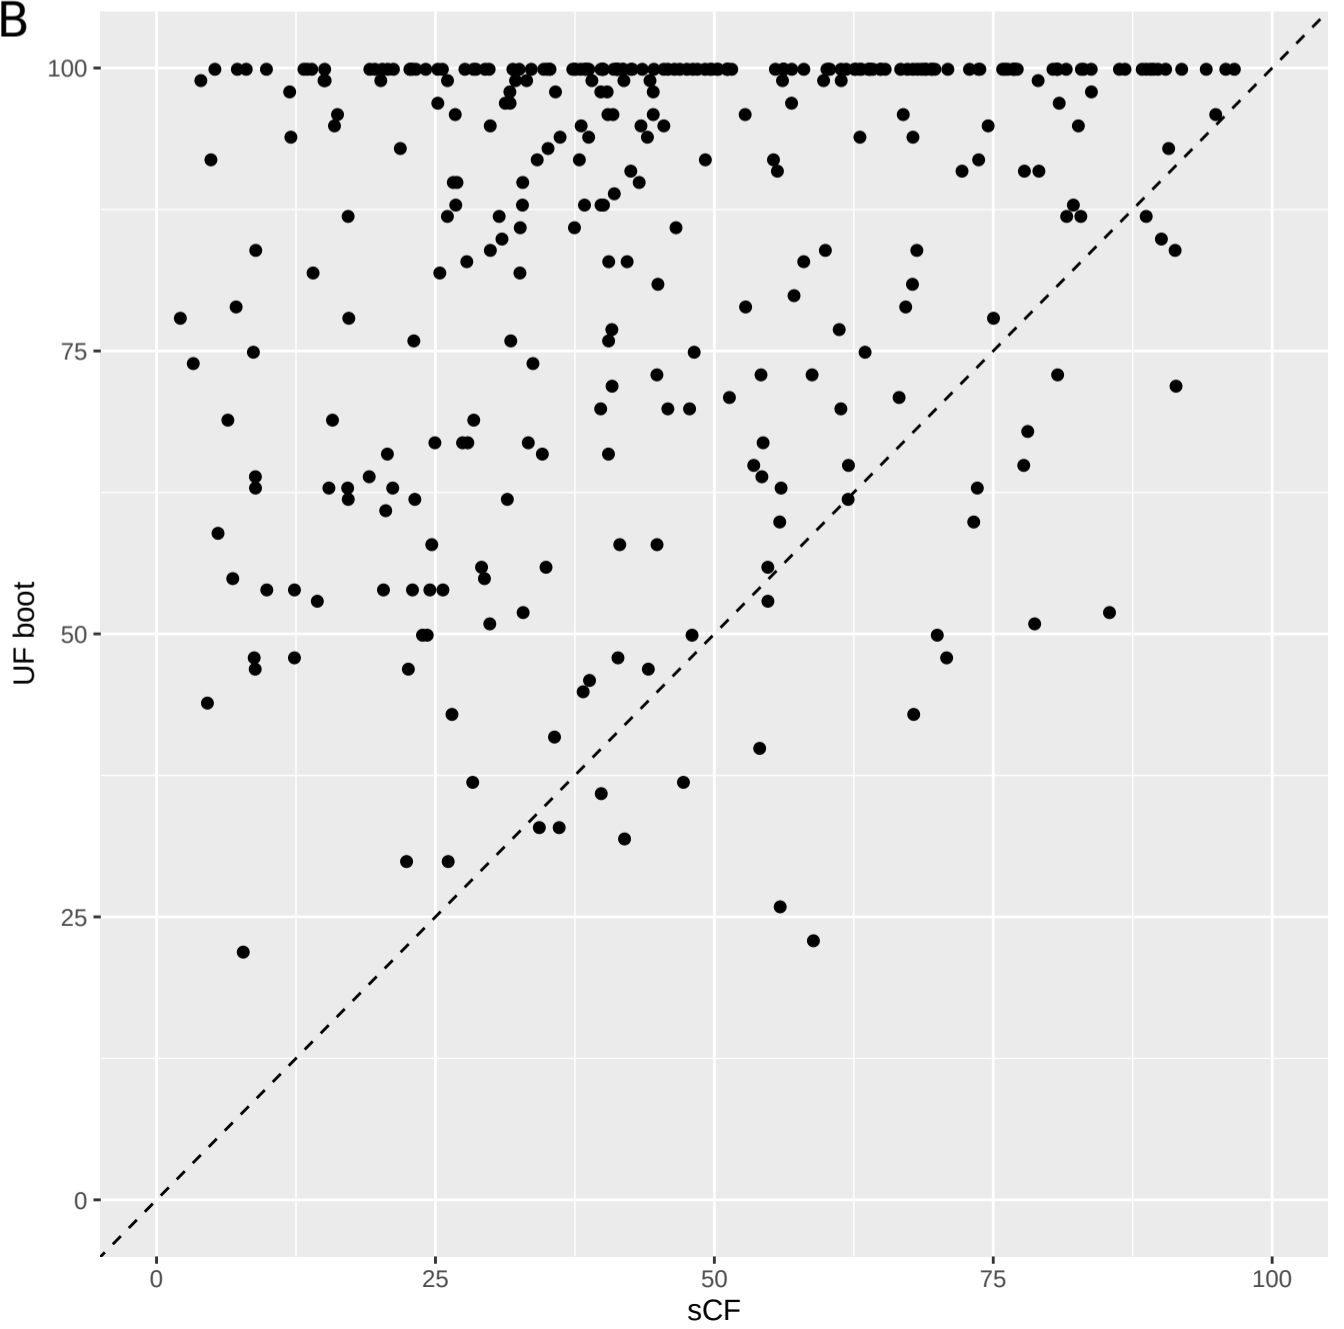

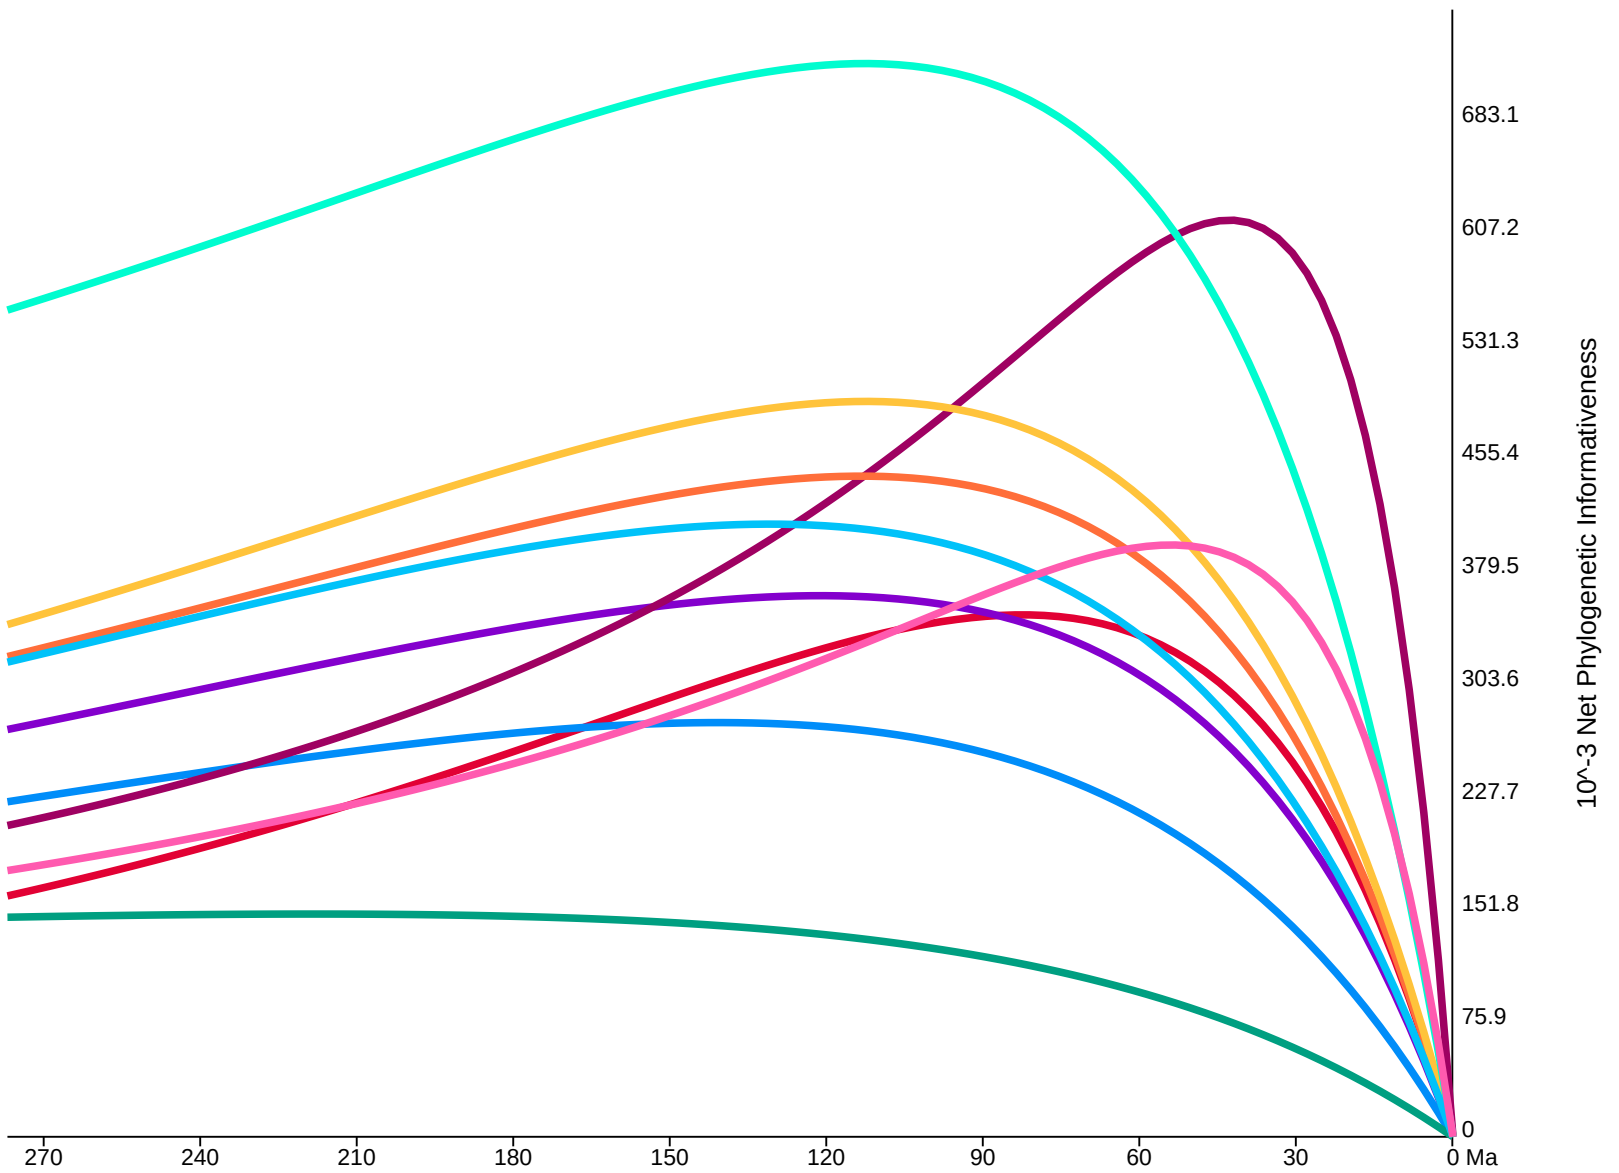

- 12S
- 18S
- AK
- H3
- 16S
- 28S
- enolase
- NAK
- gadph
- PEPCK

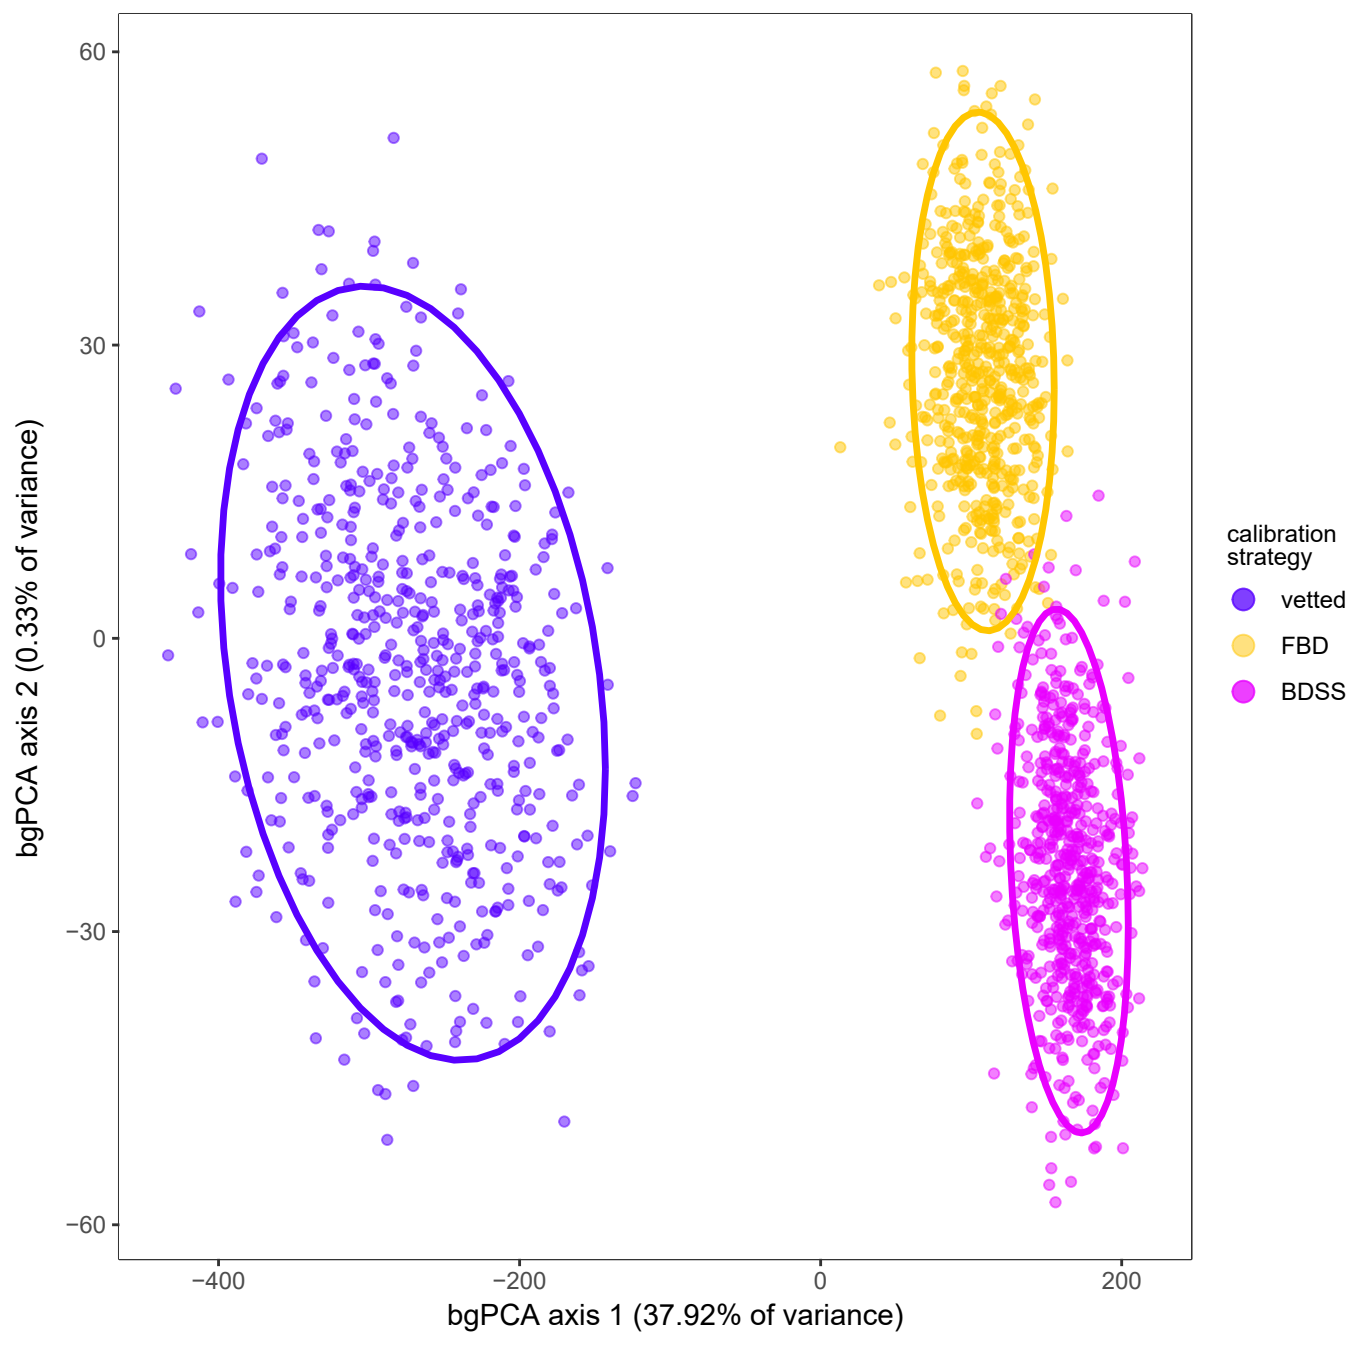

346 298 250 201 145 100 56 0

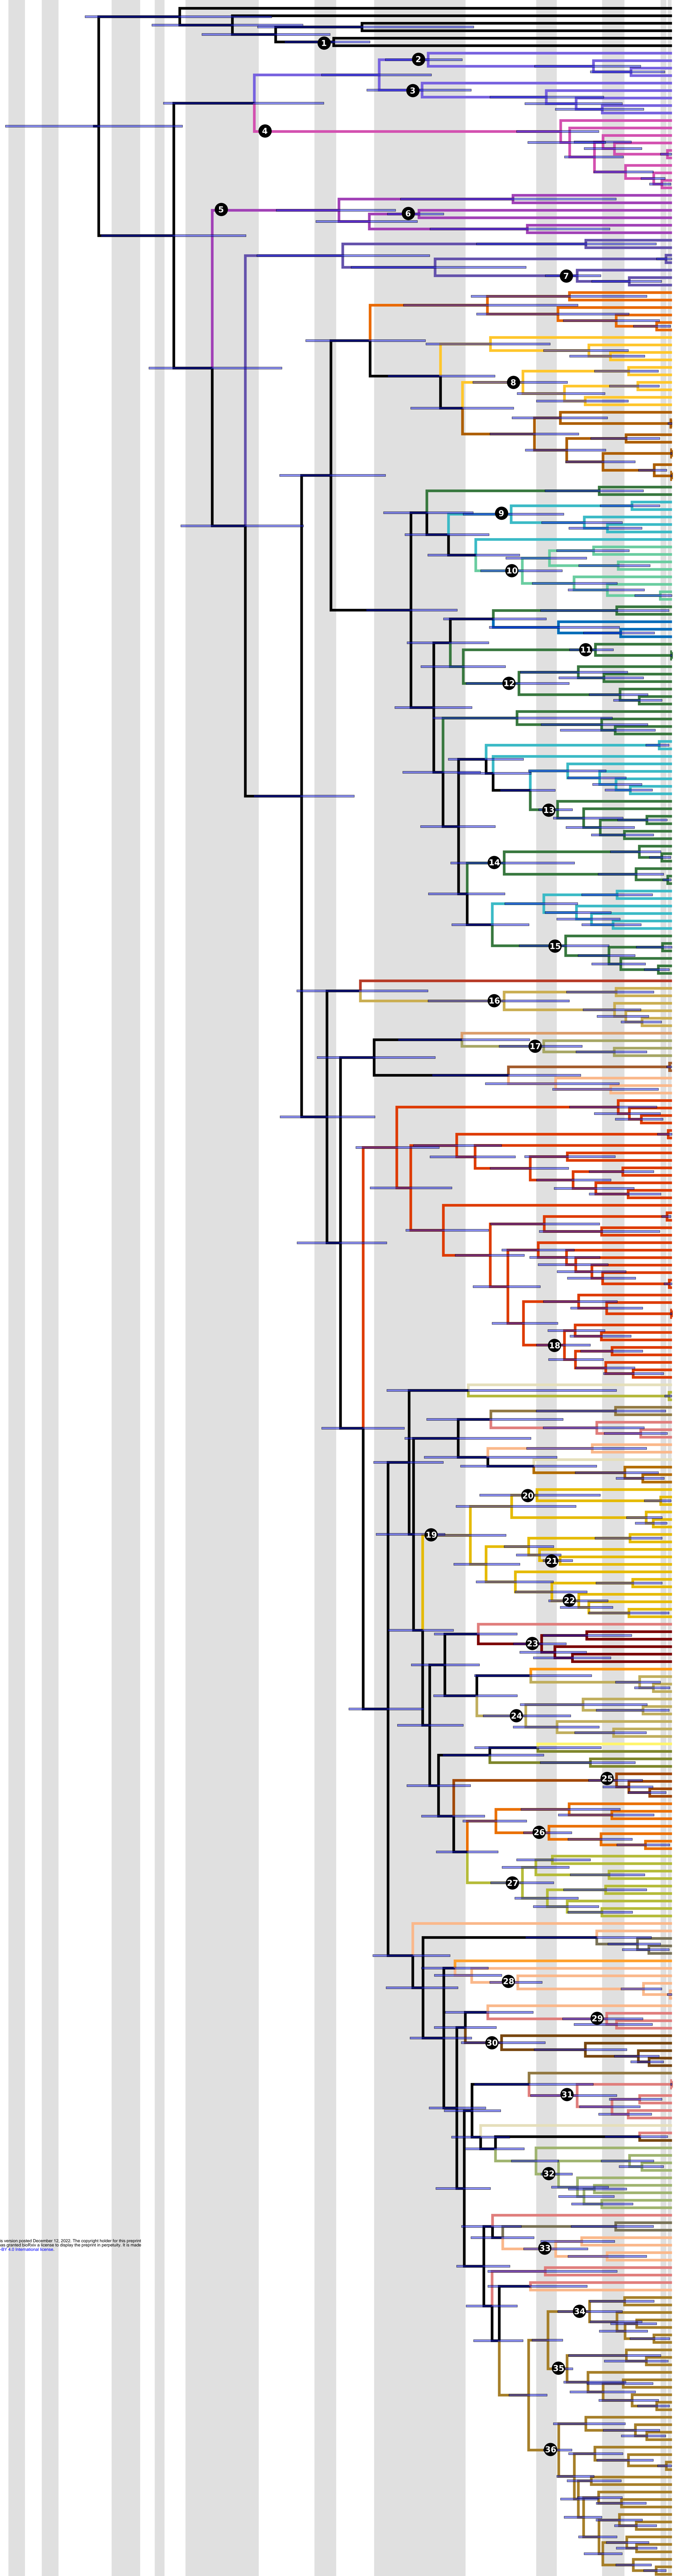

- OUT Hignidae\_Hignia adactyla
- OUT Diogenidae\_Clibanarius virescens
- OUT Kiwaidae\_Kiwa hirsuta
- OUT Lithodiidae\_Neolithodes nipponensis
- OUT Muriidae\_Muria albipulchra
- OUT Porcellanidae\_Petrolisthes japonicus
- Dynomenidae\_Metadyonemene tanensis
- Dynomenidae\_Hirsutodyonemene ursula
- Dynomenidae\_Dyonemene hispida
- Dynomenidae\_Dyonemene praedator
- Dromiidae\_Sphaerodroma\_sp
- Dromiidae\_Lauridroma dehani
- Dromiidae\_Conchoecetes artificiosus
- Dromiidae\_Lewindroma\_undulata
- Dromiidae\_Moreiradroma antillarum
- Homolidae\_Lamoha murotoensis
- Homolidae\_Lamoha longirostris
- Homolidae\_Homologenus boasi
- Homolidae\_Homologenus malayensis
- Homolidae\_Homologenus rostratus
- Homolidae\_Paromola japonica
- Latreillidae\_Epumula phalangium
- Latreillidae\_Latreilla valida
- Latreillidae\_Latreilla elegans
- Raninidae\_Ranina ranina
- Raninidae\_Raninoides benedicti
- Lyreididae\_Lyreis tridens
- Lyreididae\_Lysirude griffini
- Raninidae\_Cosmonotus grayii
- Raninidae\_Ranina muradensis
- Cyclodorippidae\_Tymolus brucei
- Cyclodorippidae\_Corycodus disjunctipes
- Cyclodorippidae\_Corycodus sp
- Cymonomidae\_Cymonomus sp
- Cymonomidae\_Cymonomus diogenes
- Hymenosomatidae\_Hymenosoma orbiculare
- Hymenosomatidae\_Neohyphopanax bovis
- Hymenosomatidae\_Amamus paralicustris
- Hymenosomatidae\_Elamena producta
- Hymenosomatidae\_Halicarcinus cookii
- Hymenosomatidae\_Halicarcinus innotatus
- Oeckeneridae\_Sexillum alauai
- Potamonautidae\_Platyphelphusa armata
- Potamonautidae\_Potamonautes perlatus
- Potamonautidae\_Potamonautes\_subukia
- Potamidae\_Potamon fluviatile
- Potamidae\_Potamon persicum
- Potamidae\_Cryptopotamon anacoluthon
- Potamidae\_Nanhaipotamon hongkongense
- Potamidae\_Isolapotamon griseoides
- Potamidae\_Potamon affine
- Gecarcinidae\_Gubernatoria gubernatoris
- Gecarcinidae\_Barytelphusa cunicularis
- Gecarcinidae\_Barytelphusa sp
- Gecarcinidae\_Spiralothelphusa sp
- Gecarcinidae\_Somanniathelphusa cf\_zanklon
- Gecarcinidae\_Gecarcinidae sp
- Gecarcinidae\_Syntripsa flavichela
- Gecarcinidae\_Paratelphusa pantherina
- Gecarcinidae\_Paratelphusa sp
- Glyptograpsidae\_Glyptograpsus jamaicensis
- Glyptograpsidae\_Platychirograpsus spectabilis
- Ocyropidae\_Ocyropoe ceratophthalmus
- Ocyropidae\_Austrua lactea
- Ocyropidae\_Gelasimus borealis
- Ocyropidae\_Potamonotus sp
- Xenopthalmidae\_Xenopthalmus pinnotheroides
- Pinnotheridae\_Arcotheres sp
- Pinnotheridae\_Neopinnotheres cf\_affinis
- Pinnotheridae\_Holothuriophilus pacificus
- Pinnotheridae\_Pinnaxodes chilensis
- Pinnotheridae\_Pinnaxia cylindrica
- Pinnotheridae\_Rathbunia pesseii
- Pinnotheridae\_Scleroplax schmitti
- Pinnotheridae\_Scleroplax tubicola
- Xenograpsidae\_Xenograpsus ngatama
- Xenograpsidae\_Xenograpsus testudinatus
- Cryptochiridae\_Haplocarcinus marsupialis
- Cryptochiridae\_Fungicola fagei
- Percnidae\_Percnon planissimum
- Percnidae\_Percnon affine
- Percnidae\_Percnon affine ourdata
- Grapsidae\_Pachygrapsus marmoratus
- Grapsidae\_Grapsus albolineatus
- Grapsidae\_Pachygrapsus pictus
- Grapsidae\_Metopograpsus frontalis
- Grapsidae\_Metopograpsus messor
- Grapsidae\_Metopograpsus quadridentatus
- Plagusidae\_Davusia glabra
- Plagusidae\_Euchirograpsus americanus
- Plagusidae\_Mesochirograpsus sineisleyi
- Plagusidae\_Plagusia squamosa
- Mictyridae\_Mictyris brevidactylus
- Mictyridae\_Mictyris longicarpus
- Macrophthalmidae\_Macrophthalmus setosus
- Macrophthalmidae\_Macrophthalmus telescopicus
- Macrophthalmidae\_Macrophthalmus erato
- Macrophthalmidae\_Chaenostoma boscii
- Macrophthalmidae\_Macrophthalmus definitus
- Varunidae\_Metaplinx longipes
- Varunidae\_Gaetice depressus
- Varunidae\_Cyclograpsus cinereus
- Varunidae\_Hemigrapsus crenulatus
- Varunidae\_Erochei japonica
- Varunidae\_Hemigrapsus penicillatus
- Gecarcinidae\_Cardisoma japonica
- Gecarcinidae\_Cardisoma guanhumi
- Gecarcinidae\_Gecarcinus lateralis
- Gecarcinidae\_Gecarcinus lateralis
- Gecarcinidae\_Gecarcinidae natalis
- Dotillidae\_Dotilla myctrioides
- Dotillidae\_Dotilla wichmani
- Dotillidae\_Scopimera mympana
- Dotillidae\_Scopimera proxima
- Dotillidae\_Scopimera intermedia
- Dotillidae\_Trimethopocera carophora
- Sesamidae\_Armases cinereum
- Sesamidae\_Parasesarma affine
- Sesamidae\_Parasesarma pictum
- Sesamidae\_Nanosesarma minutum
- Sesamidae\_Parasesarma eumolpe
- Sesamidae\_Parasesarma bidens
- Retroplumidae\_Retropluma denticulata
- Epioboceraidae\_Epiobocera gilmanii
- Epioboceraidae\_Epiobocera sinuifrons
- Pseudohelphusidae\_Potamocarcinus sp
- Pseudohelphusidae\_Raddaus orestrius
- Pseudohelphusidae\_Psychophallus montanus
- Pseudohelphusidae\_Psychophallus sp
- Orithyidae\_Orithya sinica
- Trichodactylidae\_Trichodactylus dentatus
- Trichodactylidae\_Fredocarcinus apyratii
- Trichodactylidae\_Valdivia serrata
- Belliidae\_Acanthocyclus albatrossis
- Chasmocarcinidae\_Mesophaedusa yokoyai
- Chasmocarcinidae\_Chasmocarcinus chacei
- Chasmocarcinidae\_Chasmocarcinus mississippiensis
- Oregonidae\_Hyas araneus
- Oregonidae\_Oregonia gracilis
- Oregonidae\_Chionoecetes tanneri
- Majidae\_Maja brachydactyla
- Majidae\_Maja brachydactyla ourdata
- Majidae\_Schizophrys aspera
- Inachidae\_Corythynus nisei
- Inachidae\_Ericerodes veteronis
- Inachoidae\_Arachnopsis filipes
- Inachoidae\_Colodius granulosus
- Inachoidae\_Aepinus septemspinus
- Inachoidae\_Anasimus latus
- Inachoidae\_Inachodes laevis
- Majidae\_Maiopsis panamensis
- Epiplatidae\_Pugetia nipponensis
- Epiplatidae\_Pugetia sp
- Epiplatidae\_Rochinia sp
- Epiplatidae\_Taliepus dentatus
- Epiplatidae\_Pisoides edwardsii
- Epiplatidae\_Litania sp
- Epiplatidae\_Notolopas mexicanus
- Epiplatidae\_Macrocloeoma camptocerum
- Epiplatidae\_Stenopopoda ovatus
- Epiplatidae\_Chorinus heros
- Epiplatidae\_Leptopisa setirostris
- Epiplatidae\_Tiarina sp
- Epiplatidae\_Hyastenus sp
- Epiplatidae\_Doclea canalifera
- Epiplatidae\_Doclea canalifera2
- Mithracidae\_Telephys oratus
- Mithracidae\_Microphrys branchialis
- Mithracidae\_Pitho aculeata
- Mithracidae\_Mithraculus coryphe
- Mithracidae\_Mithraculus forceps
- Mithracidae\_Thoe erosa
- Mithracidae\_Ala cornuta
- Mithracidae\_Mithrax hispidus
- Pilumnoididae\_Pilumnoides nudifrons
- Pseudocarcinidae\_Pseudocarcinus gigas
- Dairidae\_Daira americana
- Dairidae\_Daira perla
- Menippidae\_Menippe lumphii
- Menippidae\_Myomenippe fornasinii
- Menippidae\_Myomenippe hardwickii
- Acidopsidae\_Acidops imbricatus
- Acidopsidae\_Acidops sp
- Pseudozuidae\_Euryozius camachoii
- Carpiliidae\_Carpilius corallinus
- Carpiliidae\_Carpilius convexus
- Carpiliidae\_Carpilius maculatus
- Geryoniidae\_Raymanninus schmitti
- Geryoniidae\_Chaceon mediterraneus
- Geryoniidae\_Chaceon sp
- Ovalipidae\_Ovalipes stephensoni
- Ovalipidae\_Ovalipes indescens
- Ovalipidae\_Ovalipes punctatus
- Portunidae\_Portunus pelagicus
- Portunidae\_Portunus sayi
- Portunidae\_Scylla paramamosain
- Portunidae\_Charybdis ferata
- Portunidae\_Tharatta pygmaea
- Carcinidae\_Parathelphusa orientalis
- Carcinidae\_Carcinus maenas
- Carcinidae\_Portunus latipes
- Thidae\_Thia scottellaiand2
- Polybiidae\_Bathynectes longispina
- Polybiidae\_Liocarcinus depurator
- Polybiidae\_Necora pulchra
- Dairiidae\_Dairioides kusei
- Parthenopidae\_Parthenope longimanus
- Parthenopidae\_Rhinolambrus sp
- Parthenopidae\_Parthenopeus excavatus
- Parthenopidae\_Cryptopodia fornicata
- Parthenopidae\_Leiolambrus punctatissimus
- Aethridae\_Hapatus epheliticus1and2
- Matutidae\_Matuta sp
- Matutidae\_Ashotret Lunaris
- Matutidae\_Matuta planipes
- Calappidae\_Acanthocarpus alexandri
- Calappidae\_Mursia sp1
- Calappidae\_Mursia sp2
- Calappidae\_Cyclops granulosus
- Calappidae\_Calappa calappa
- Calappidae\_Calappa philargius
- Cheragonidae\_Telmessus cheragonus1and2
- Corystidae\_Corystes cassivelaunus
- Corystidae\_Gomezia bicornis
- Corystidae\_Jonas distinctus
- Carcinidae\_Metacarcinus magister
- Carcinidae\_Cancer borealis
- Carcinidae\_Anatokis japonicus
- Carcinidae\_Cancer pagurus
- Ethusidae\_Ethusina abyssicola
- Ethusidae\_Ethusina sexdentata
- Ethusidae\_Parotus
- Dorippidae\_Dorippe quadridens
- Dorippidae\_Heikeopsis japonica
- Dorippidae\_Paradorippe australiensis
- Dorippidae\_Paradorippe granulata
- Leucosiidae\_Ebalia tuberculosa
- Leucosiidae\_Praebebilia longidactyla
- Leucosiidae\_Pythilia carinata
- Leucosiidae\_Pythilia syndactyla
- Leucosiidae\_Tokoy eburnea
- Leucosiidae\_Urathina pustuloides
- Iphiculiidae\_Iphiculus convexus
- Leucosiidae\_Arcania cornuta
- Leucosiidae\_Randallia buligera
- Conleyidae\_Conleyus sp
- Progeryoniidae\_Rhadinoplax microphthalmus
- Bythograeidae\_Ganadulus pua
- Bythograeidae\_Austinothraea hurdezi
- Bythograeidae\_Austinothraea sp1and2
- Trichopeltidae\_Trichopeltation noblie
- Vulvulidae\_Vulvulus articus
- Euryplacidae\_Frevillea barbata
- Euryplacidae\_Eucrate crenata
- Euryplacidae\_Eucrate rocki
- Euryplacidae\_Eucrate sp
- Mathildellidae\_Mathildella rubra
- Erpithidae\_Erphia scalchida
- Erpithidae\_Erphia smithi
- Erpithidae\_Erphia verrucosa
- Trapeziidae\_Philopocarcinus ovaliformis
- Trapeziidae\_Trapezia rufopunctata
- Trapeziidae\_Trapezia digitalis
- Trapeziidae\_Trapezia septata
- Trapeziidae\_Trapezia nigra
- Dacryopilumnidae\_Dacryopilumnus rathbunae
- Ozidae\_Epixanthus frontalis
- Ozidae\_Epixanthus sp
- Ozidae\_Epixanthus tenuidactylus
- Ozidae\_Lydia annulipes
- Ozidae\_Ozium rugulosus
- Ozidae\_Ozium rugulosus
- Pseudozuidae\_Pseudozuidus caystrus
- Platyanthidae\_Platyanthus orthogryllus
- Tanaocheidae\_Tanaocheles bidentata
- Pilumnidae\_Danielum tbauchiac
- Pilumnidae\_Pilumnus agassizii
- Pilumnidae\_Pilumnus dasypodus
- Pilumnidae\_Pilumnus vesperillo
- Galeniidae\_Galena bipanosa
- Pilumnidae\_Heteropanope glabra
- Pilumnidae\_Pilumnus longicornis
- Pilumnidae\_Tarameiodon spinosum
- Hypothalassidae\_Hypothalassia armata
- Bythograeidae\_Bythograea laubieri
- Bythograeidae\_Bythograea micros
- Goneplacidae\_Goneplax longimanus
- Goneplacidae\_Pycnoplax surugensis
- Goneplacidae\_Carcinoplax purpurea
- Goneplacidae\_Neopropilax renouci
- Platyanthidae\_Danielethrus patagonicus
- Platyanthidae\_Homalaspis plana
- Platyanthidae\_Omaronanthus balboai
- Scalopidiidae\_Scalopidia spinosipes
- Pseudorhombiidae\_Pseudorhombia quadridentata
- Pseudorhombiidae\_Trapezioplax tridentata
- Pseudorhombiidae\_Lophanthus lamelipes
- Pseudorhombiidae\_Micropanope sculpsites
- Pseudorhombiidae\_Panoplax depressa
- Pseudorhombiidae\_Nanoplax xanthiformis
- Pseudorhombiidae\_Thalassoplax angusta
- Panopeidae\_Panopeus herbstii
- Panopeidae\_Euryplum limosum
- Panopeidae\_Malacoplax californiensis
- Panopeidae\_Hexapanopeus angustifrons
- Panopeidae\_Acatitlobolus bermudensis
- Panopeidae\_Glyptoplax smithi
- Panopeidae\_Rhithropanopeus harrisi
- Panopeidae\_Dyspanopeus sayi
- Panopeidae\_Neopanope jackardii
- Xanthidae\_Lybia tessellata
- Xanthidae\_Aliactaea lithostrota
- Xanthidae\_Carropopus papulosus
- Xanthidae\_Edwardsium lobipes
- Xanthidae\_Paraxanthus barbiger
- Xanthidae\_Catakepodius floridanus
- Xanthidae\_Xanthodius floridanus
- Xanthidae\_Xanthodius sternbergii1and2
- Xanthidae\_Williamsimpsonia denticulatus
- Xanthidae\_Xantho pilipes
- Xanthidae\_Palapeda cf\_nitida
- Xanthidae\_Cyclodius obscurus
- Xanthidae\_Pilodius arcuatus
- Xanthidae\_Xanthias canalliculatus
- Xanthidae\_Atergatis floridus
- Xanthidae\_Atergatis inaequalis
- Xanthidae\_Actaea difrons
- Xanthidae\_Paractaea sp
- Xanthidae\_Playactaea domi
- Xanthidae\_Demania scaberima
- Xanthidae\_Actaeodes cf\_tomentosus
- Xanthidae\_Novactaea bella

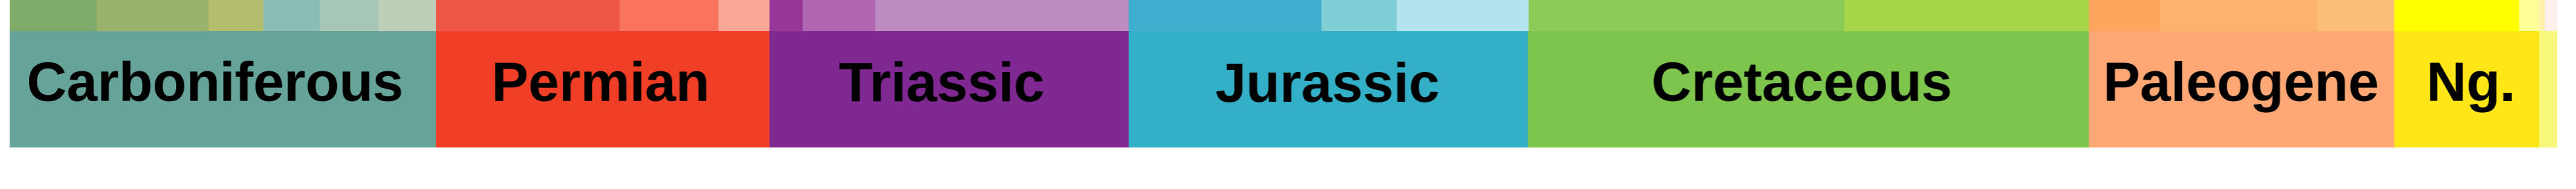

bioRxiv preprint doi: <https://doi.org/10.1101/2022.12.08.518818>; this version posted December 12, 2022. The copyright holder for this preprint (which was not certified by peer review) is the author/funder, who has granted bioRxiv a license to display the preprint in perpetuity. It is made available under aCC-BY 4.0 International license.

250 | 201 | 145 | 100 | 56 | 0

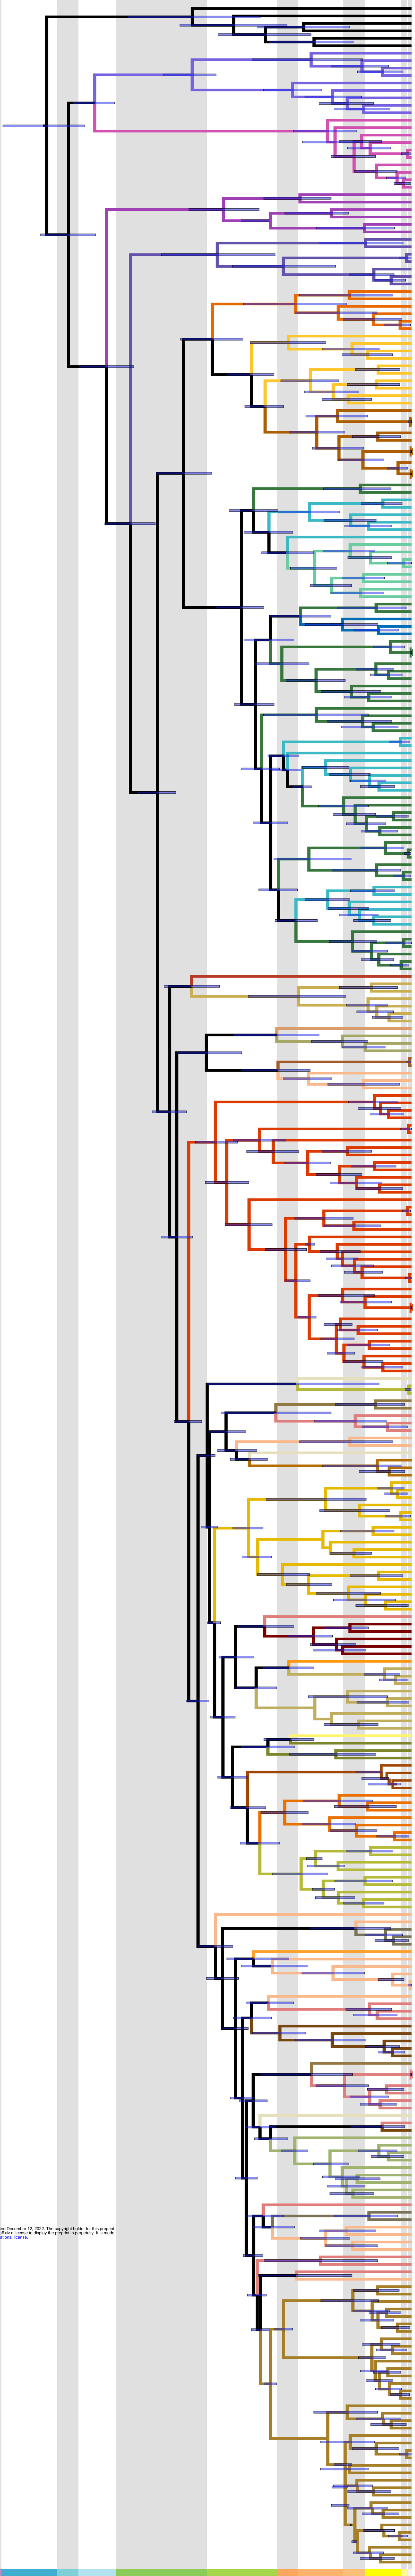

- OUT\_Hippidae\_Hippa\_adactyla
- OUT\_Diogenidae\_Clibanarius\_virescens
- OUT\_Kiwaidae\_Kiwa\_hirsuta
- OUT\_Lithodidae\_Tymolus\_nipponensis
- OUT\_Munididae\_Munida\_albiapicula
- OUT\_Porcellanidae\_Petrolisthes\_japonicus
- Dynomenidae\_Metadynomene\_tanensis
- Dynomenidae\_Hirsutodynomene\_ursula
- Dynomenidae\_Dynomene\_hispida
- Dynomenidae\_Dynomene\_praedator
- Dromiidae\_Sphaerodromia\_sp
- Dromiidae\_Lauridromia\_dehaani
- Dromiidae\_Conchoecetes\_articulosus
- Dromiidae\_Levidromia\_undentatus
- Dromiidae\_Moreiradromia\_antillensis
- Homolidae\_Lamoha\_murotoensis
- Homolidae\_Lamoha\_longirostris
- Homolidae\_Homola\_orientalis
- Homolidae\_Paromolopsis\_bonui
- Homolidae\_Homologenus\_malayensis
- Homolidae\_Homologenus\_rostratus
- Homolidae\_Paromola\_japonica
- Latreillidae\_Eplumula\_phaiangium
- Latreillidae\_Latreilla\_valida
- Latreillidae\_Latreilla\_elegans
- Raninidae\_Ranina\_ranina
- Raninidae\_Raninoides\_benedicti
- Raninidae\_Nanilia\_muricata
- Raninidae\_Cosmonotus\_grayii
- Lyreididae\_Lyreidus\_tridentatus
- Lyreididae\_Lysirude\_griffini
- Cyclodorippidae\_Tymolus\_brucei
- Cyclodorippidae\_Tymolus\_japonicus
- Cyclodorippidae\_Corycodus\_disjunctipes
- Cyclodorippidae\_Corycodus\_sp
- Cymonomidae\_Cymonomus\_sp
- Cymonomidae\_Cymonomus\_diogenes
- Cymonomidae\_Cymonomus\_quadratus
- Hymenosomatidae\_Hymenosoma\_orbiculare
- Hymenosomatidae\_Neohynchoplax\_bovis
- Hymenosomatidae\_Amarinus\_paralacustris
- Hymenosomatidae\_Elamena\_producta
- Hymenosomatidae\_Halcarcinus\_cookii
- Hymenosomatidae\_Halcarcinus\_innomatus
- Deckeniidae\_Seychellum\_allaudi
- Potamonautidae\_Platyhelphusa\_armata
- Potamonautidae\_Potamonautus\_perlatus
- Potamonautidae\_Potamonautus\_subukia
- Potamidae\_Potamon\_fluviatile
- Potamidae\_Nanhaiotamon\_hongkongense
- Potamidae\_Cryptopotamon\_ancacolothon
- Potamidae\_Isoptapotamon\_griswoldi
- Potamidae\_Johora\_tomanensis
- Gecarcinucidae\_Gubernatoriana\_gubernatoris
- Gecarcinucidae\_Barytelphusa\_cunicularis
- Gecarcinucidae\_Barytelphusa\_sp
- Gecarcinucidae\_Scyrothelphusa\_sp
- Gecarcinucidae\_Spiralothelphusa\_senex
- Gecarcinucidae\_Somanniathelphusa\_cf\_zanklon
- Gecarcinucidae\_Syntipisa flavicheia
- Gecarcinucidae\_Parathelphusa\_pantherina
- Gecarcinucidae\_Parathelphusa\_sp
- Glyptograpsidae\_Glyptograpsus\_jamaicensis
- Glyptograpsidae\_Platychoirapsus\_spectabilis
- Ocypodidae\_Ocypode\_ceratophthalmus
- Ocypodidae\_Ocypode\_siniensis
- Ocypodidae\_Austruca\_lactea
- Ocypodidae\_Gelasimus\_borealis
- Ocypodidae\_Paraleptuca\_craspides
- Xenophthalmidae\_Xenophthalmus\_pinnotheroides
- Pinnotheridae\_Pinnixa\_cylindrica
- Pinnotheridae\_Rathbunika\_pearsei
- Pinnotheridae\_Scleroplax\_schmitti
- Pinnotheridae\_Arcoberses\_sp
- Pinnotheridae\_Nepinnotheres\_cf\_affinis
- Pinnotheridae\_Holothuriophilus\_pacificus
- Pinnotheridae\_Pinnaxodes\_chilensis
- Xenograpsidae\_Xenograpsus\_ngatama
- Xenograpsidae\_Xenograpsus\_testudinatus
- Cryptochiridae\_Haplocarcinus\_marsupialis
- Cryptochiridae\_Dacryomaia\_sp
- Cryptochiridae\_Fungicola\_fagei
- Percnidae\_Percnon\_planissimum
- Percnidae\_Percnon\_affine
- Percnidae\_Percnon\_affine\_ourdata
- Grapsidae\_Metopograpsus\_frontalis
- Grapsidae\_Metopograpsus\_messor
- Grapsidae\_Metopograpsus\_quadridentatus
- Grapsidae\_Pachygrapsus\_marmoratus
- Grapsidae\_Grapsus\_albolineatus
- Grapsidae\_Pachygrapsus\_plicatus
- Plagusidae\_Davusia\_glabra
- Plagusidae\_Euchirograpsus\_americanus
- Plagusidae\_Meristograpsus\_kingsleyi
- Plagusidae\_Plagusia\_squamosa
- Mictyridae\_Mictyris\_brevidactylus
- Mictyridae\_Mictyris\_longicarpus
- Helocidae\_Helocetus\_cordiformis
- Macrophthalmidae\_Macrophthalmus\_setosus
- Macrophthalmidae\_Macrophthalmus\_telescopicus
- Macrophthalmidae\_Macrophthalmus\_erato
- Macrophthalmidae\_Chaenostoma\_boscii
- Macrophthalmidae\_Macrophthalmus\_definitus
- Varunidae\_Metaplax\_longipes
- Varunidae\_Gaetice\_depressus
- Varunidae\_Cyclograpsus\_cinereus
- Varunidae\_Hemigrapsus\_crenulatus
- Varunidae\_Eriochir\_japonica
- Varunidae\_Hemigrapsus\_penicillatus
- Gecarcinidae\_Gecarcinus\_lateralis
- Gecarcinidae\_Gecarcoidea\_lalandi
- Gecarcinidae\_Gecarcoidea\_natalis
- Gecarcinidae\_Tuekayana\_hirtipes
- Gecarcinidae\_Cardisoma\_crassum
- Gecarcinidae\_Cardisoma\_guanhum
- Dotillidae\_Dotilla\_mycetoides
- Dotillidae\_Dotilla\_wichmanni
- Dotillidae\_Scopimera\_bilypana
- Dotillidae\_Scopimera\_proxima
- Dotillidae\_Scopimera\_intermedia
- Dotillidae\_Tmethypocoelis\_ceratophora
- Sesamidae\_Parasesarma\_cinereum
- Sesamidae\_Parasesarma\_affine
- Sesamidae\_Parasesarma\_pictum
- Sesamidae\_Nanosesarma\_minutum
- Sesamidae\_Parasesarma\_eumolpe
- Sesamidae\_Parasesarma\_bidens
- Retroplumidae\_Retropluma\_denticulata
- Epiloboceraidae\_Epilobocera\_sinuatifrons
- Pseudothelphusidae\_Potamocarcinus\_sp
- Pseudothelphusidae\_Raddius\_orestris
- Pseudothelphusidae\_Ptychophallus\_montanus
- Pseudothelphusidae\_Ptychophallus\_sp
- Orithyidae\_Orithya\_sinica
- Trichodactylidae\_Trichodactylus\_dentatus
- Trichodactylidae\_Predicarcinus\_apyratii
- Trichodactylidae\_Valdivia\_serrata
- Belliidae\_Acanthocyclus\_albatrossis
- Belliidae\_Acanthocyclus\_hassleri
- Chasmocarcinidae\_Megaesthesius\_yokoyai
- Chasmocarcinidae\_Chasmocarcinus\_chacei
- Chasmocarcinidae\_Chasmocarcinus\_mississippiensis
- Oregonidae\_Hyas\_araneus
- Oregonidae\_Oregonia\_gracilis
- Oregonidae\_Chionoecetes\_tanneri
- Oregonidae\_Hyas\_lyratus
- Majidae\_Maja\_brachydactyla
- Majidae\_Maja\_brachydactyla\_ourdata
- Majidae\_Schizophrys\_aspera
- Inachidae\_Coryrhynchus\_riseti
- Inachidae\_Enicoides\_voleonis
- Inachoididae\_Arachnopsis\_filipes
- Inachoididae\_Collodes\_granosus
- Inachoididae\_Aepinus\_septemspinus
- Inachoididae\_Anasimus\_latus
- Inachoididae\_Inachoides\_laevis
- Majidae\_Maiopsis\_panamensis
- Epiplatidae\_Pugetia\_nipponensis
- Epiplatidae\_Pugetia\_sp
- Epiplatidae\_Talopus\_dentatus
- Epiplatidae\_Pisoides\_edwardsii
- Epiplatidae\_Libinia\_sp
- Epiplatidae\_Notolopas\_mexicanus
- Epiplatidae\_Macroceroles\_camptocorum
- Epiplatidae\_Stenocionops\_ovatus
- Epiplatidae\_Chorinus\_heros
- Epiplatidae\_Leptopisa\_setrostris
- Epiplatidae\_Tiarinia\_sp
- Epiplatidae\_Hyasterus\_sp
- Epiplatidae\_Doclea\_canalifera
- Epiplatidae\_Doclea\_canalifera2
- Mithracidae\_Teleophrys\_ornatus
- Mithracidae\_Microphrys\_branchialis
- Mithracidae\_Pitho\_aculeata
- Mithracidae\_Mithraculus\_coryphe
- Mithracidae\_Mithraculus\_forceps
- Mithracidae\_Thee\_erosa
- Mithracidae\_Ala\_cornuta
- Mithracidae\_Mithrax\_hispidus
- Pilumnidae\_Pilumnus\_rudifrons
- Pseudocarcinidae\_Pseudocarcinus\_gigas
- Pseudocarcinidae\_Pseudocarcinus\_gigas\_ourdata
- Dairidae\_Daira\_americanus
- Dairidae\_Daira\_perlata
- Menippidae\_Myomenippe\_rumphii
- Menippidae\_Myomenippe\_fornasini
- Menippidae\_Myomenippe\_hardwickii
- Acidopsidae\_Acidops\_fimbriatus
- Acidopsidae\_Acidops\_sp
- Pseudozoidae\_Eurozois\_camachoi
- Carpiliidae\_Carpilius\_corallinus
- Carpiliidae\_Carpilius\_convexus
- Carpiliidae\_Carpilius\_maculatus
- Ovalipidae\_Ovalipes\_bethunsoni
- Ovalipidae\_Ovalipes\_irdescens
- Ovalipidae\_Ovalipes\_punctatus
- Geryonidae\_Raymanninus\_schmitti
- Geryonidae\_Chaceon\_mediterraneus
- Geryonidae\_Chaceon\_sp
- Portunidae\_Portunus\_pelagicus
- Portunidae\_Portunus\_sayi
- Portunidae\_Scylla\_paramamosain
- Portunidae\_Charybdis\_ferriata
- Portunidae\_Thranis\_pryma
- Carcinidae\_Paratharites\_orientalis
- Carcinidae\_Carcinus\_maenas
- Carcinidae\_Portunus\_latipes
- Thidae\_Thia\_scutellata1and2
- Polybiidae\_Eurydromus\_longispina
- Polybiidae\_Liocarcinus\_depurator
- Polybiidae\_Necora\_puber
- Dairoidae\_Dairoides\_kusei
- Parthenopidae\_Parthenope\_longimanus
- Parthenopidae\_Rhinolambus\_sp
- Parthenopidae\_Ochtholambus\_excavatus
- Parthenopidae\_Cryptopodia\_fornicata
- Parthenopidae\_Leiolambus\_punctatissimus
- Aethridae\_Hepatus\_ophelictus1and2
- Matutidae\_Matuta\_sp
- Matutidae\_Ashoret\_lunaris
- Matutidae\_Matuta\_planipes
- Calappidae\_Acanthocarpus\_alexandri
- Calappidae\_Mursia\_sp1
- Calappidae\_Mursia\_sp2
- Calappidae\_Cycloes\_granulosa
- Calappidae\_Calappa\_calappa
- Calappidae\_Calappa\_philargius
- Chiragonidae\_Telmessus\_chiragonus1and2
- Corystidae\_Corystes\_cassivelanus
- Corystidae\_Gomezia\_bicornis
- Corystidae\_Jonas\_distinctus
- Cancridae\_Metacarcinus\_magister
- Cancridae\_Cancer\_borealis
- Cancridae\_Anatolikos\_japonicus
- Cancridae\_Cancer\_pagurus
- Ethusidae\_Ethusina\_abyssicola
- Ethusidae\_Ethusina\_sp
- Dorippidae\_Dorippe\_quadridens
- Dorippidae\_Heikeopsis\_japonica
- Dorippidae\_Paradorippe\_australensis
- Dorippidae\_Paradorippe\_granulata
- Leucosidae\_Pyrhila\_carnata
- Leucosidae\_Pyrhila\_sp
- Leucosidae\_Praebellia\_longidactyla
- Leucosidae\_Eballia\_tuberculosa
- Leucosidae\_Tokoyo\_eburnea
- Leucosidae\_Uranchinus\_pustuloides
- Iphiculiidae\_Iphiculus\_convexus
- Leucosidae\_Arcania\_cornuta
- Leucosidae\_Randallia\_bulligera
- Comelyidae\_Comeleyus\_sp
- Bythogeraeidae\_Rhadinolax\_microphthalmus
- Bythogeraeidae\_Gandalfus\_puia
- Bythogeraeidae\_Austingraea\_hordezi
- Bythogeraeidae\_Austingraea\_sp1and2
- Trichopeltariidae\_Trichopeltaria\_nobile
- Vultocidae\_Vultocinus\_antipus
- Euryplacidae\_Frevillea\_barbata
- Euryplacidae\_Eucrate\_crenata
- Euryplacidae\_Eucrate\_alcocki
- Euryplacidae\_Eucrate\_sp
- Mathilellidae\_Mathilella\_rubra
- Eriphiidae\_Eriphia\_scabricula
- Eriphiidae\_Eriphia\_smithii
- Eriphiidae\_Eriphia\_verrucosa
- Trapezidae\_Philippicarcinus\_oviformis
- Trapezidae\_Trapezia\_rufopunctata
- Trapezidae\_Trapezia\_digitalis
- Trapezidae\_Trapezia\_septata
- Trapezidae\_Trapezia\_tigrina
- Dacryoplumidae\_Dacryoplumnum\_rathbunae
- Ozidae\_Epixanthus\_frontalis
- Ozidae\_Epixanthus\_sp
- Ozidae\_Epixanthus\_tenuidactylus
- Ozidae\_Ozium\_reticulatus
- Ozidae\_Lydia\_annulipes
- Ozidae\_Ozium\_rugulosus
- Pseudozoidae\_Pseudozoides\_caystrus
- Platyxanthidae\_Platyxanthus\_orbigny
- Tetralidae\_Tetralia\_glaberrima
- Tanachidae\_Tanacheles\_bidentata
- Pilumnidae\_Danielum\_xbauchac
- Pilumnidae\_Lobopilumnus\_agassizii
- Pilumnidae\_Pilumnus\_dasyopodus
- Pilumnidae\_Pilumnus\_vespertilio
- Pilumnidae\_Pilumnus\_longicornis
- Pilumnidae\_Tieramedon\_spinosum
- Pilumnidae\_Heteropanope\_glabra
- Galeniidae\_Galene\_bispinosa
- Hypothalassidae\_Hypothalassia\_armata
- Bythogeraeidae\_Bythogrea\_lauberi
- Goneplacidae\_Carcinoplax\_longimanus
- Goneplacidae\_Pycnoplax\_surugensis
- Goneplacidae\_Carcinoplax\_purpurea
- Goneplacidae\_Euopageus\_arenosus
- Platyxanthidae\_Danielus\_patagonicus
- Platyxanthidae\_Omaroxanthus\_balboai
- Scatopodiidae\_Scatopodia\_spinosipes
- Pseudorhombidae\_Pseudorhombia\_quadridentata
- Pseudorhombidae\_Lophoxanthus\_tridentatus
- Pseudorhombidae\_Micropanope\_sculptipes
- Pseudorhombidae\_Panoplax\_depressa
- Pseudorhombidae\_Panoplax\_xanthiformis
- Pseudorhombidae\_Thalassoplax\_angusta
- Panopeidae\_Eurytium\_limosum
- Panopeidae\_Malacoplax\_californiensis
- Panopeidae\_Hexapanopeus\_angustifrons
- Panopeidae\_Acanthobolus\_bermudensis
- Panopeidae\_Glyptoplax\_smithii
- Panopeidae\_Rhithropanopeus\_harrisi
- Panopeidae\_Dyspanopeus\_sayi
- Panopeidae\_Neopanope\_packardii
- Xanthidae\_Lybia\_tessellata
- Xanthidae\_Allactaea\_lithostrota
- Xanthidae\_Carpoporius\_papulosus
- Xanthidae\_Edwardsium\_lolipes
- Xanthidae\_Paraxanthus\_barbigera
- Xanthidae\_Catleptodius\_floridanus
- Xanthidae\_Xanthodius\_cooksoni
- Xanthidae\_Xanthodius\_sternbergii1and2
- Xanthidae\_Williamsia\_denticulata
- Xanthidae\_Xantho\_pilipes
- Xanthidae\_Palaeodia\_cf\_nitida
- Xanthidae\_Cyclocladius\_obscurus
- Xanthidae\_Pliodius\_ireolatus
- Xanthidae\_Xanthus\_cancellulatus
- Xanthidae\_Atergatis\_floridus
- Xanthidae\_Atergatis\_integerrimus
- Xanthidae\_Demania\_scaberrima
- Xanthidae\_Actaeoetes\_cf\_tomentosus
- Xanthidae\_Actaeoetes\_bella
- Xanthidae\_Actaea\_bifrons
- Xanthidae\_Platyactaea\_dovii
- Xanthidae\_Paractaea\_sp

Triassic | Jurassic | Cretaceous | Paleogene | Ng.

bioRxiv preprint doi: <https://doi.org/10.1101/2022.12.09.519815>; this version posted December 12, 2022. The copyright holder for this preprint (which was not certified by peer review) is the author/funder, who has granted bioRxiv a license to display the preprint in perpetuity. It is made available under aCC-BY 4.0 International license.

250 201 145 100 56 0

- OUT\_Hippidae\_Hippa\_adactyla
- OUT\_Diogenidae\_Clibanarius\_virescens
- OUT\_Kiwiidae\_Kiwa\_hirsuta
- OUT\_Lithodidae\_Neolithodes nipponensis
- OUT\_Mundidae\_Munida\_albiapicula
- OUT\_Porcellanidae\_Petrolisthes\_japonicus
- Dynomenidae\_Metadynomene\_tanensis
- Dynomenidae\_Hirstodynomene\_ursula
- Dynomenidae\_Dynomenes\_hispida
- Dynomenidae\_Dynomenes\_praedator
- Dromidae\_Sphaerodromia\_sp
- Dromidae\_Lauridromia\_dehaani
- Dromidae\_Conchocetes\_antiflosus
- Dromidae\_Lewindromia\_undulata
- Dromidae\_Moreiradromia\_antillensis
- Homolidae\_Lamoha\_murotoensis
- Homolidae\_Lamoha\_longirostris
- Homolidae\_Homola\_orientalis
- Homolidae\_Paromolopsis\_boasi
- Homolidae\_Homologenus\_malayensis
- Homolidae\_Homologenus\_rostratus
- Homolidae\_Paromola\_japonica
- Latreillidae\_Eplumula\_phalangium
- Latreillidae\_Latreilla\_valida
- Latreillidae\_Latreilla\_elegans
- Raninidae\_Ranina\_ranina
- Raninidae\_Raninoides\_benedicti
- Raninidae\_Cosmonotus\_grayi
- Raninidae\_Ranilla\_muricata
- Lyreididae\_Lyreidus\_tridentatus
- Lyreididae\_Lysirude\_griffini
- Cyclodorippidae\_Tymolus\_japonicus
- Cyclodorippidae\_Tymolus\_trucei
- Cyclodorippidae\_Corycodus\_disjunctipes
- Cyclodorippidae\_Corycodus\_sp
- Cymonomidae\_Cymonomus\_sp
- Cymonomidae\_Cymonomus\_diogenes
- Cymonomidae\_Cymonomus\_quadrius
- Hymenosomatidae\_Hymenosoma\_orbiculare
- Hymenosomatidae\_Neohynchoplax\_bovis
- Hymenosomatidae\_Amarinus\_paralacustris
- Hymenosomatidae\_Eiomena\_prolifica
- Hymenosomatidae\_Halicarcinus\_cookii
- Hymenosomatidae\_Halicarcinus\_innomatus
- Deckenidae\_Seychellum\_alluadi
- Potamonautidae\_Platyhelphusa\_armata
- Potamonautidae\_Potamonautus\_perlatus
- Potamonautidae\_Rotundopotamonautus\_subukia
- Potamidae\_Potamon\_persicum
- Potamidae\_Cryptopotamon\_anacoluthon
- Potamidae\_Potamon\_hongkongense
- Potamidae\_Johora\_tioanensis
- Potamidae\_Isopotamon\_griswoldi
- Gecarcinidae\_Gubernatorina\_gubernatoris
- Gecarcinidae\_Barytelphusa\_cunicularis
- Gecarcinidae\_Barytelphusa\_sp
- Gecarcinidae\_Ceylonthelphusa\_sp
- Gecarcinidae\_Spiralothelphusa\_senex
- Gecarcinidae\_Somaniathelphusa\_cf\_zanklon
- Gecarcinidae\_Somaniathelphusa\_sp
- Gecarcinidae\_Syntripsa\_flavichela
- Gecarcinidae\_Parathelphusa\_pantherina
- Gecarcinidae\_Parathelphusa\_sp
- Glyptograpsidae\_Glyptograpsus\_jamaicensis
- Glyptograpsidae\_Ptychograpsus\_spectabilis
- Ocypodidae\_Ocyopde\_ceratophthalmus
- Ocypodidae\_Ocyopde\_sinensis
- Ocypodidae\_Austruca\_lactea
- Ocypodidae\_Gelasimus\_borealis
- Ocypodidae\_Paraleptuca\_crassipes
- Xenopthalmidae\_Xenopthalmus\_pinnotheroides
- Pinnotheridae\_Pinnixa\_cylindrica
- Pinnotheridae\_Rathbunixa\_pearsei
- Pinnotheridae\_Scleroplax\_schmitti
- Pinnotheridae\_Scleroplax\_tubicola
- Pinnotheridae\_Arcotheres\_sp
- Pinnotheridae\_Nepinnotherees\_cf\_affinis
- Pinnotheridae\_Holothurophilus\_pacificus
- Pinnotheridae\_Pinnaxodes\_chiensis
- Xenograpsidae\_Xenograpsus\_ngalama
- Xenograpsidae\_Xenograpsus\_testudinatus
- Cryptochiridae\_Hapalocarcinus\_marsupialis
- Cryptochiridae\_Dacyomyia\_sp
- Cryptochiridae\_Furcigocia\_fagei
- Percnidae\_Percnon\_planissimum
- Percnidae\_Percnon\_affine
- Percnidae\_Percnon\_affine\_ourdata
- Grapsidae\_Pachygrapsus\_marmoratus
- Grapsidae\_Grapsus\_albolineatus
- Grapsidae\_Pachygrapsus\_pilcatus
- Grapsidae\_Metopograpsus\_frontalis
- Grapsidae\_Metopograpsus\_messor
- Grapsidae\_Metopograpsus\_quadridentatus
- Plagusidae\_Davusia\_glabra
- Plagusidae\_Euchirograpsus\_americanus
- Plagusidae\_Mersiograpsus\_kingsleyi
- Plagusidae\_Plagusia\_squamosa
- Micyridae\_Micyris\_brevidactylus
- Micyridae\_Micyris\_longicauda
- Helocidae\_Helocius\_cordiformis
- Macrophthalmidae\_Macrophthalmus\_setosus
- Macrophthalmidae\_Macrophthalmus\_telescopicus
- Macrophthalmidae\_Macrophthalmus\_erato
- Macrophthalmidae\_Chaenostoma\_boscii
- Macrophthalmidae\_Macrophthalmus\_definitus
- Varunidae\_Metaplex\_longipes
- Varunidae\_Gaetice\_depressus
- Varunidae\_Cyclograpsus\_cinereus
- Varunidae\_Hemigrapsus\_crenulatus
- Varunidae\_Eriocheir\_japonica
- Varunidae\_Hemigrapsus\_penicillatus
- Gecarcinidae\_Tuerkayana\_hirtipes
- Gecarcinidae\_Cardisoma\_crassum
- Gecarcinidae\_Cardisoma\_guanhumi
- Gecarcinidae\_Gecarcinus\_lateralis
- Gecarcinidae\_Gecarcoidea\_lalandii
- Gecarcinidae\_Gecarcoidea\_natalis
- Dotillidae\_Dotilla\_mycetozoa
- Dotillidae\_Dotilla\_wichmanni
- Dotillidae\_Scopimera\_bitympana
- Dotillidae\_Scopimera\_proxima
- Dotillidae\_Scopimera\_intermedia
- Dotillidae\_Tmethypocoelis\_ceratophora
- Sesarmidae\_Armases\_cinereum
- Sesarmidae\_Parasesarma\_affine
- Sesarmidae\_Parasesarma\_pictum
- Sesarmidae\_Nanosesarma\_minuta
- Sesarmidae\_Parasesarma\_eumolpe
- Sesarmidae\_Perisesarma\_bidens
- Retroplumidae\_Retropluma\_denticulata
- Epioboceniidae\_Epiobocera\_gilmanii
- Epioboceniidae\_Epiobocera\_simulifrons
- Pseudothelphusidae\_Potamocarcinus\_sp
- Pseudothelphusidae\_Raddaus\_orestris
- Pseudothelphusidae\_Ptychophallus\_montanus
- Pseudothelphusidae\_Ptychophallus\_sp
- Orithyidae\_Orithya\_sinica
- Trichodactylidae\_Trichodactylus\_dentatus
- Trichodactylidae\_Fredilocarcinus\_apyrati
- Trichodactylidae\_Valdivia\_serrata
- Belliidae\_Acanthocyclus\_albatrossis
- Belliidae\_Acanthocyclus\_hassleri
- Chasmocarcinidae\_Megaesthesius\_yokoyai
- Chasmocarcinidae\_Chasmocarcinus\_chacei
- Chasmocarcinidae\_Chasmocarcinus\_mississippiensis
- Oregonidae\_Hyas\_aranus
- Oregoniidae\_Oregonia\_gracilis
- Oregoniidae\_Chionoecetes\_tanneri
- Oregoniidae\_Hyas\_lyratus
- Majidae\_Maja\_brachydactyla
- Majidae\_Maja\_brachydactyla\_ourdata
- Majidae\_Schizophrys\_aspera
- Inachidae\_Coryrhynchus\_risei
- Inachidae\_Ericerodes\_veleronis
- Inachoididae\_Arachnopsis\_hilipes
- Inachoididae\_Collodes\_grossus
- Inachoididae\_Aepinus\_septempinosus
- Inachoididae\_Anasimus\_latus
- Inachoididae\_Inachoides\_laevis
- Majidae\_Maiopsis\_pananensis
- Epiplatidae\_Pugettia\_nipponensis
- Epiplatidae\_Pugettia\_sp
- Epiplatidae\_Talpeus\_dentatus
- Epiplatidae\_Rochinia\_sp
- Epiplatidae\_Pisoides\_edwardsii
- Epiplatidae\_Libinia\_sp
- Epiplatidae\_Notolopas\_mexicanus
- Epiplatidae\_Macrocoeloma\_camptocerum
- Epiplatidae\_Stenocionops\_ovatus
- Epiplatidae\_Choriurus\_heros
- Epiplatidae\_Leptopsis\_setirostris
- Epiplatidae\_Tiarina\_sp
- Epiplatidae\_Hyastenus\_sp
- Epiplatidae\_Doclea\_carallera
- Epiplatidae\_Doclea\_carallera2
- Mithracidae\_Teleophrys\_ornatus
- Mithracidae\_Microphrys\_branchialis
- Mithracidae\_Pitho\_aculeata
- Mithracidae\_Mithraculus\_coryphe
- Mithracidae\_Mithraculus\_forceps
- Mithracidae\_Thea\_erosa
- Mithracidae\_Aia\_comuta
- Mithracidae\_Mithrax\_hispidus
- Plummodidae\_Plummodes\_nudifrons
- Pseudocarcinidae\_Pseudocarcinus\_gigas
- Pseudocarcinidae\_Pseudocarcinus\_gigas\_ourdata
- Dairidae\_Daira\_americana
- Menippidae\_Menippe\_rumphii
- Menippidae\_Myomenippe\_fornasini
- Menippidae\_Myomenippe\_hardwickii
- Acidopsidae\_Acidops\_fimbriatus
- Pseuduridae\_Euryozus\_camachoii
- Carpiliidae\_Carpilius\_corallinus
- Carpiliidae\_Carpilius\_convexus
- Carpiliidae\_Carpilius\_maculatus
- Ovalipidae\_Ovalipes\_stephensoni
- Ovalipidae\_Ovalipes\_ridescens
- Ovalipidae\_Ovalipes\_punctatus
- Geryonidae\_Raymanninus\_schmitti
- Geryonidae\_Chaceon\_mediterraneus
- Geryonidae\_Chaceon\_sp
- Portunidae\_Portunus\_pelagicus
- Portunidae\_Portunus\_sayi
- Portunidae\_Scylla\_paramamosain
- Portunidae\_Thranita\_pyrnna
- Portunidae\_Charybdis\_ferida
- Carcinidae\_Carcinus\_maenas
- Carcinidae\_Portunus\_latipes
- Thiidae\_Thia\_scutellata1and2
- Polybiidae\_Bathynectes\_longispina
- Polybiidae\_Liocarcinus\_lescurator
- Polybiidae\_Necora\_puber
- Dairoiidae\_Dairoides\_kusei
- Parthenopidae\_Parthenope\_longimanus
- Parthenopidae\_Rhinolambrus\_sp
- Parthenopidae\_Ochtholambrus\_excavatus
- Parthenopidae\_Leiolambrus\_punctatissimus
- Parthenopidae\_Cryptopodia\_fornicata
- Aethridae\_Hepatus\_ephelliticus1and2
- Matutidae\_Matutia\_sp
- Matutidae\_Ashorei\_lunaris
- Matutidae\_Matutia\_planipes
- Calappidae\_Acanthocarpus\_alexandri
- Calappidae\_Mursia\_sp1
- Calappidae\_Mursia\_sp2
- Calappidae\_Cycloes\_granulosa
- Calappidae\_Calappa\_calappa
- Calappidae\_Calappa\_philargius
- Corystidae\_Gomezia\_bicornis
- Corystidae\_Janthus\_distinctus
- Corystidae\_Corystes\_cassivelaunus
- Cheiragonidae\_Telmessus\_cheiragonus1and2
- Cancridae\_Metacarcinus\_magister
- Cancridae\_Cancer\_borealis
- Cancridae\_Anatolus\_japonicus
- Cancridae\_Cancer\_pagurus
- Ethusidae\_Ethusia\_abyssiicola
- Ethusidae\_Ethusia\_sexdentata
- Ethusidae\_Parethus\_sp
- Dorippidae\_Dorippe\_quadridens
- Dorippidae\_Heikeopsis\_japonica
- Dorippidae\_Paradorippe\_australensis
- Dorippidae\_Paradorippe\_granulata
- Leucosiidae\_Pythia\_sp
- Leucosiidae\_Pythia\_carinata
- Leucosiidae\_Ebalia\_tuberculosa
- Leucosiidae\_Praebebailia\_longidactyla
- Leucosiidae\_Tokoyo\_eburnea
- Leucosiidae\_Urshimi\_mustuloides
- Iphiculiidae\_Iphiculus\_convexus
- Leucosiidae\_Arcania\_comuta
- Leucosiidae\_Randallia\_bulligera
- Conlyidae\_Conlyus\_sp
- Progeryonidae\_Rhadioplax\_micropthalmus
- Bythograeidae\_Gandalfus\_puia
- Bythograeidae\_Austingraea\_hordezi
- Bythograeidae\_Austingraea\_sp1and2
- Triopetelidae\_Triopetelion\_nobile
- Vultrociidae\_Vultrocinus\_anfractus
- Euryplacidae\_Frevillea\_barbata
- Euryplacidae\_Eucrate\_crenata
- Euryplacidae\_Eucrate\_alcocki
- Euryplacidae\_Eucrate\_sp
- Mathildellidae\_Mathildella\_rubra
- Eriphidae\_Eriphia\_sabirica
- Eriphidae\_Eriphia\_verrucosa
- Eriphidae\_Eriphia\_smitni
- Trapeziidae\_Philippicrinus\_oviformis
- Trapeziidae\_Trapezia\_rufopunctata
- Trapeziidae\_Trapezia\_digitalis
- Trapeziidae\_Trapezia\_septata
- Trapeziidae\_Trapezia\_ligina
- Dacryoplumidae\_Dacryoplumus\_rathbunae
- Oziidae\_Epixanthus\_frontalis
- Oziidae\_Lydia\_annulipes
- Oziidae\_Ozius\_rugulosus
- Oziidae\_Epixanthus\_tenuidactylus
- Oziidae\_Ozius\_reticulatus
- Pseudozidae\_Pseudozium\_caystrus
- Platyxanthidae\_Platyxanthus\_obigny
- Tetralidae\_Tetralia\_glaberrima
- Tanaocheilidae\_Tanaocheilus\_bidentata
- Pilumnidae\_Danielum\_ixbauchac
- Pilumnidae\_Lobopilumnus\_agassizii
- Pilumnidae\_Pilumnus\_dasydopus
- Pilumnidae\_Pilumnus\_venustus
- Pilumnidae\_Heteropanope\_glabra
- Galenidae\_Galena\_bispinosa
- Pilumnidae\_Pilumnus\_longicornis
- Pilumnidae\_Taranedon\_spinosus
- Hypothalassidae\_Hypothalassia\_armata
- Bythograeidae\_Bythograea\_laubieri
- Bythograeidae\_Bythograea\_laubieri
- Goneplacidae\_Carcinoplax\_purpurea
- Goneplacidae\_Neogoneplax\_tenuiculus
- Goneplacidae\_Carcinoplax\_longimanus
- Goneplacidae\_Pycnoplax\_saraguenis
- Platyxanthidae\_Danieliethus\_patagonicus
- Platyxanthidae\_Homalaspis\_plana
- Platyxanthidae\_Crinioxanthus\_balboai
- Scalopidiidae\_Scalopidia\_spinosipes
- Pseudorhombilidae\_Pseudorhombila\_quadridentata
- Pseudorhombilidae\_Trapezioplax\_tridentata
- Pseudorhombilidae\_Lophoxanthus\_lamelipes
- Pseudorhombilidae\_Micropanope\_sculptipes
- Pseudorhombilidae\_Nanoplax\_depressa
- Pseudorhombilidae\_Nanoplax\_xanthiformis
- Pseudorhombilidae\_Thalassoplax\_angusta
- Panopeidae\_Panopeus\_ertstii
- Panopeidae\_Eurytemora\_limosum
- Panopeidae\_Malacopecten\_californiensis
- Panopeidae\_Hexapanopeus\_angustifrons
- Panopeidae\_Acantholobulus\_bermudensis
- Panopeidae\_Gyropanopeus\_sinihi
- Panopeidae\_Rhinthropanopeus\_harrisii
- Panopeidae\_Dyspanopeus\_sayi
- Panopeidae\_Neopanope\_packardii
- Xanthidae\_Lybia\_tessellata
- Xanthidae\_Aliactaea\_lithostrota
- Xanthidae\_Carporpus\_papulosus
- Xanthidae\_Edwardsium\_lobipes
- Xanthidae\_Paraxanthus\_barbigus
- Xanthidae\_Cataleptodius\_floridanus
- Xanthidae\_Xanthodius\_cooksoni
- Xanthidae\_Xanthodius\_sternberghii1and2
- Xanthidae\_Williamsimpsonia\_denticulatus
- Xanthidae\_Xantho\_pilipes
- Xanthidae\_Palaedius\_cf\_nitida
- Xanthidae\_Cycloides\_obscurus
- Xanthidae\_Pilodius\_areolatus
- Xanthidae\_Xanthias\_canaliculatus
- Xanthidae\_Xanthias\_floridus
- Xanthidae\_Atergatis\_fronserranus
- Xanthidae\_Actaea\_frons
- Xanthidae\_Paractaea\_sp
- Xanthidae\_Platyactaea\_dovii
- Xanthidae\_Demania\_scaberima
- Xanthidae\_Actaeaes\_of\_tomentosus
- Xanthidae\_Novactaea\_bella

bioRxiv preprint doi: <https://doi.org/10.1101/2022.12.09.508816>; this version posted December 12, 2022. The copyright holder for this preprint (which was not certified by peer review) is the author/funder, who has granted bioRxiv a license to display the preprint in perpetuity. It is made available under aCC-BY 4.0 International license.

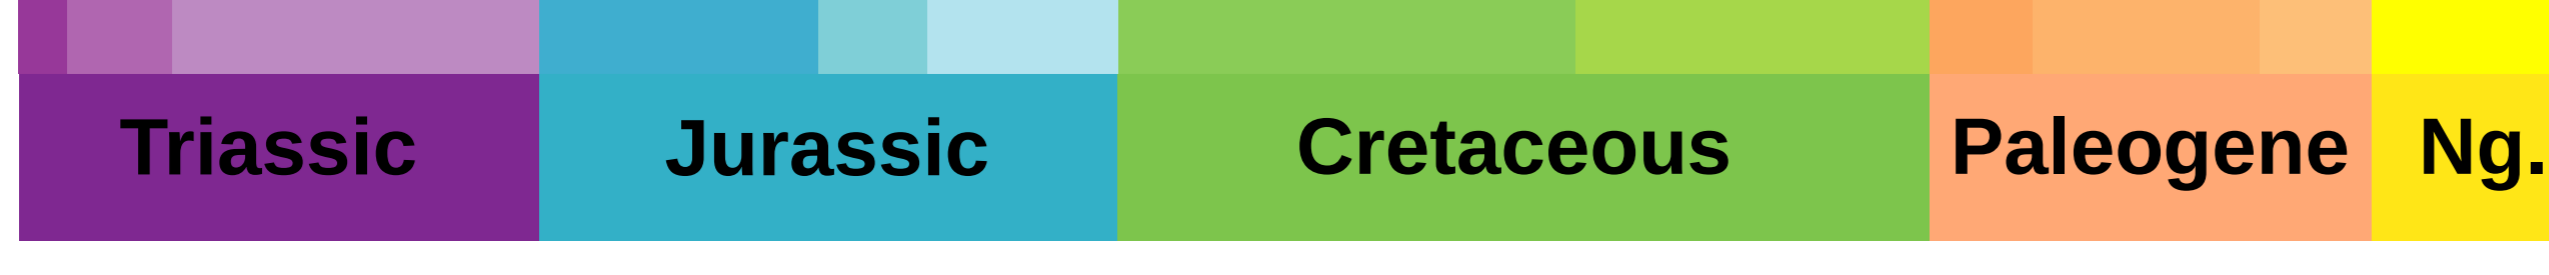

Meiura root

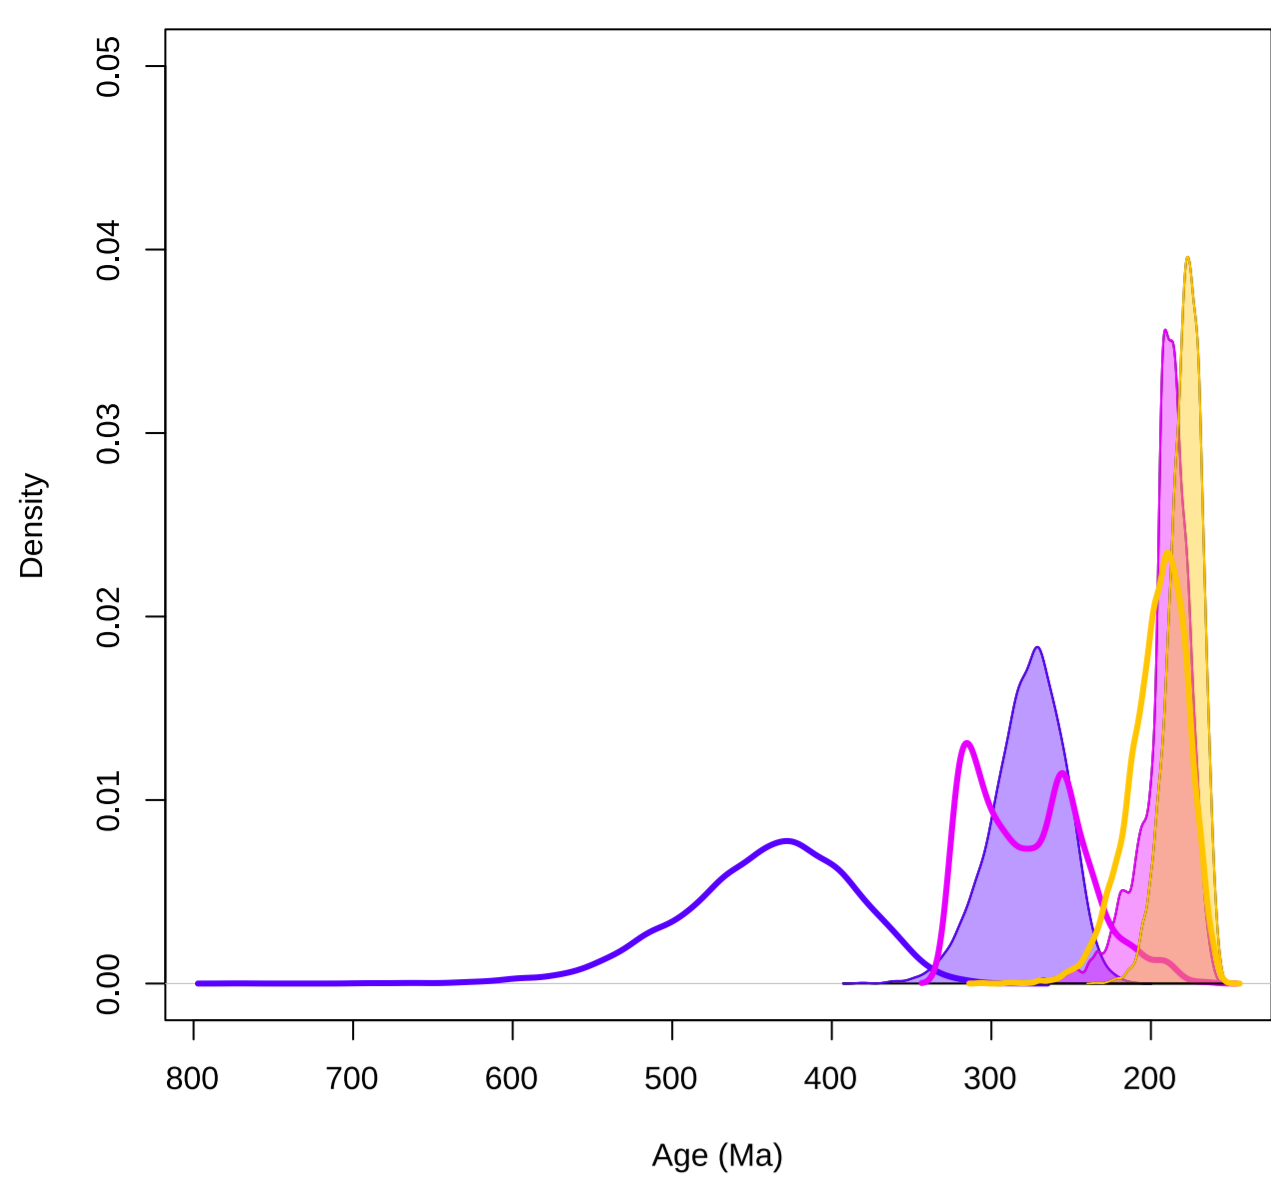

sensitive node #1: Lyreididae

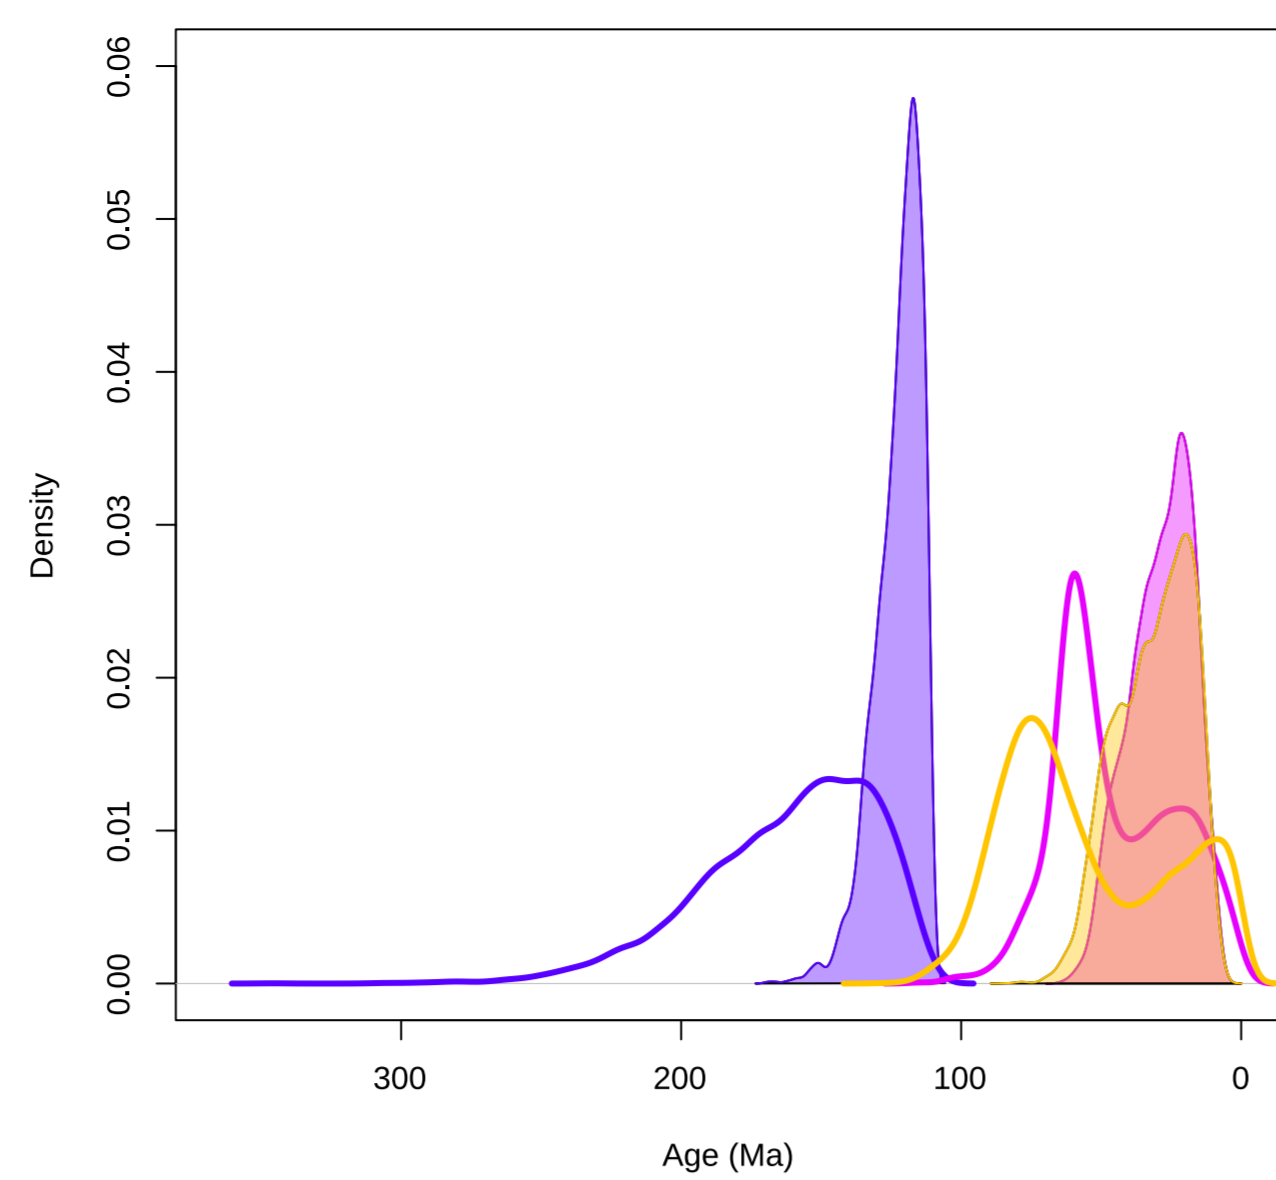

sensitive node #2: Raninoidea

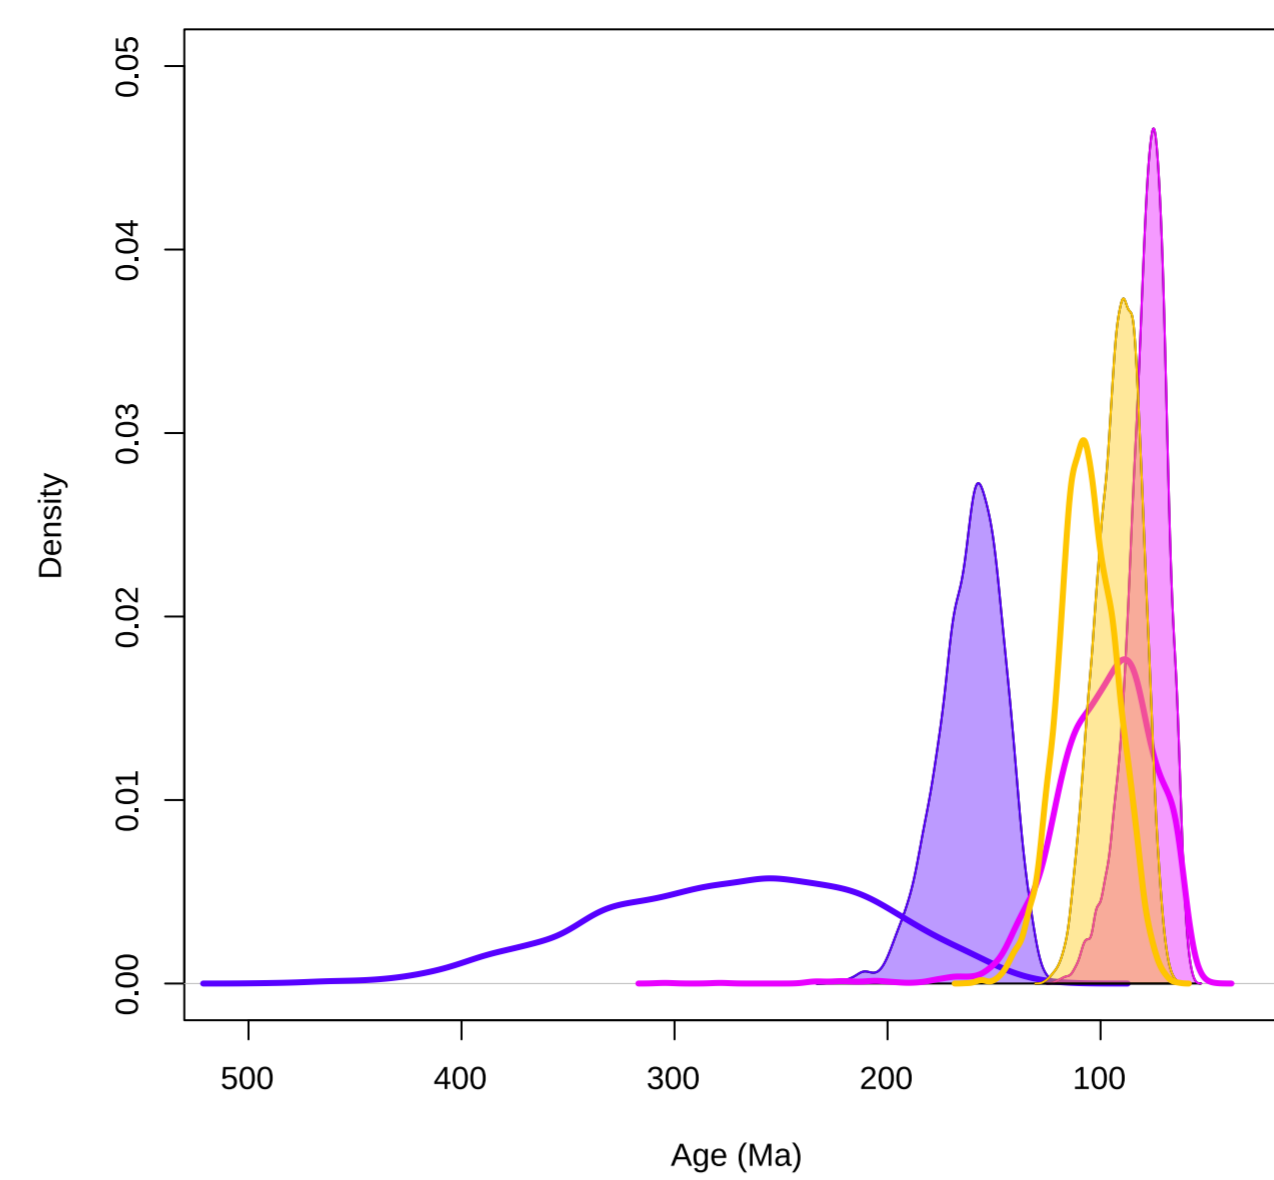

sensitive node #3: MRCA of Lysirude griffini + Cosmonotus grayii

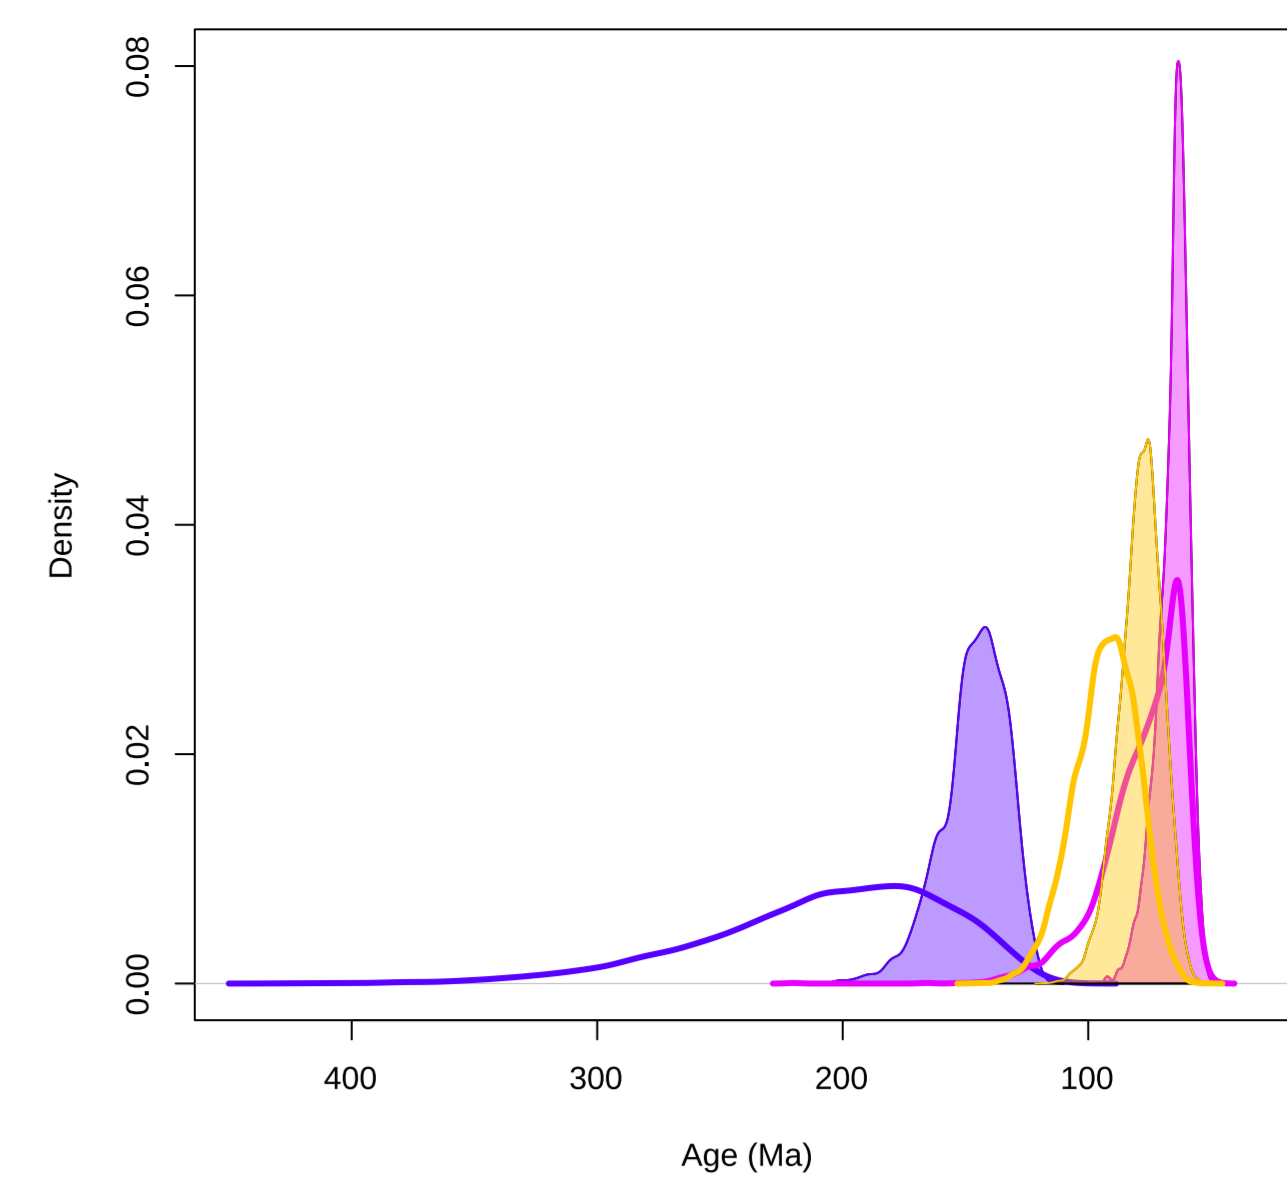

sensitive node #3: MRCA of Raninoidea + Eubrachiura

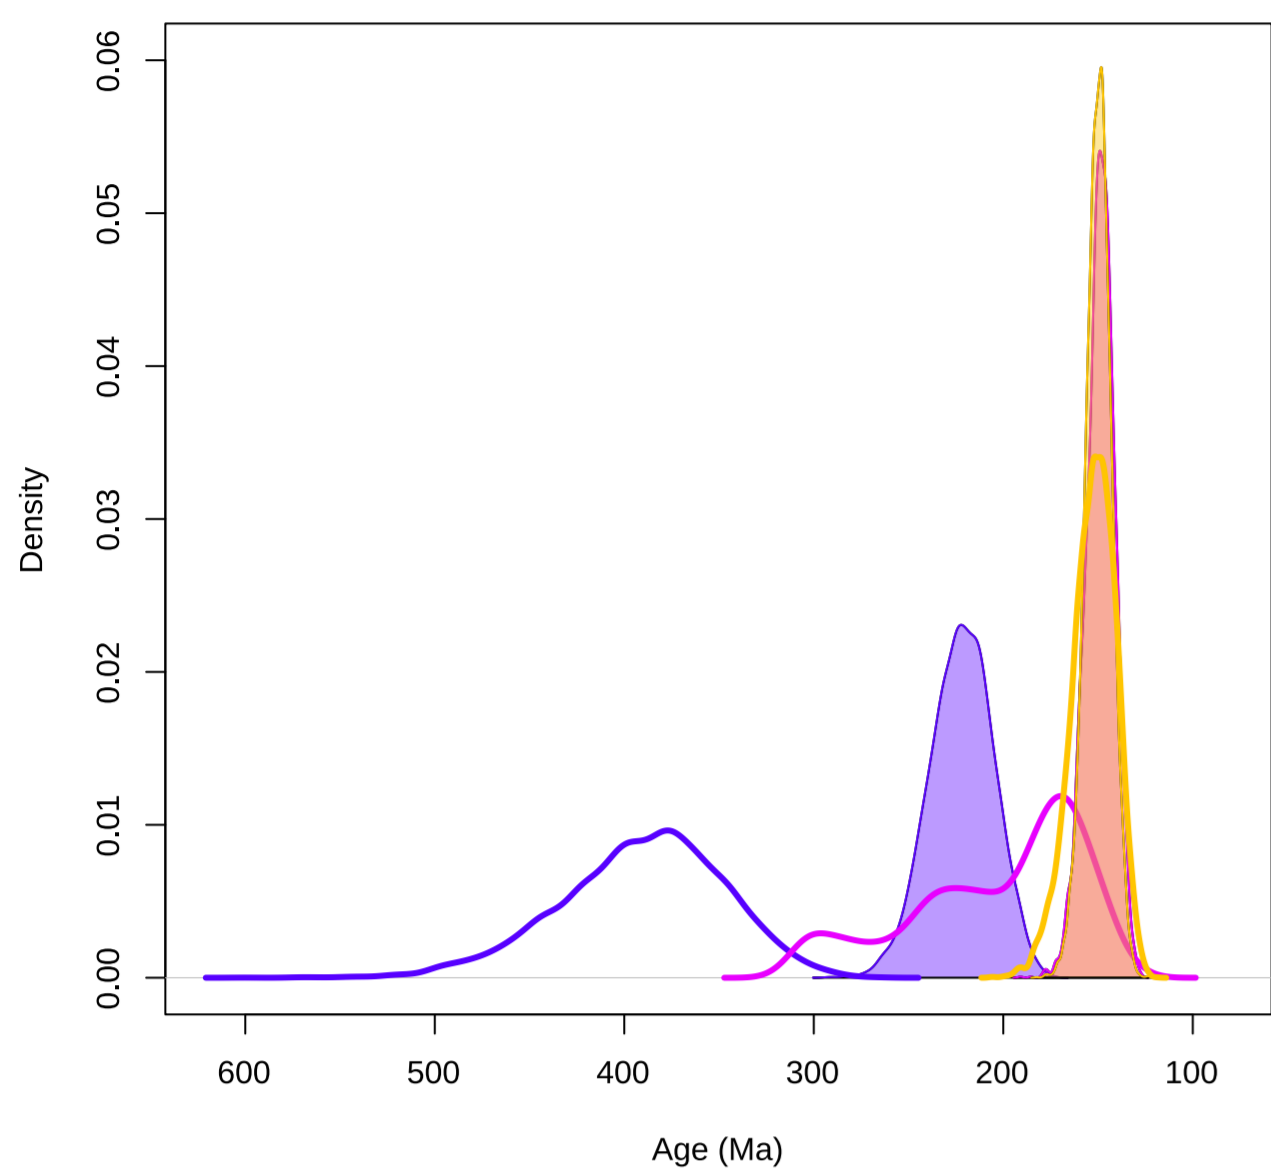

sensitive node #5: Cyclodorippoidea

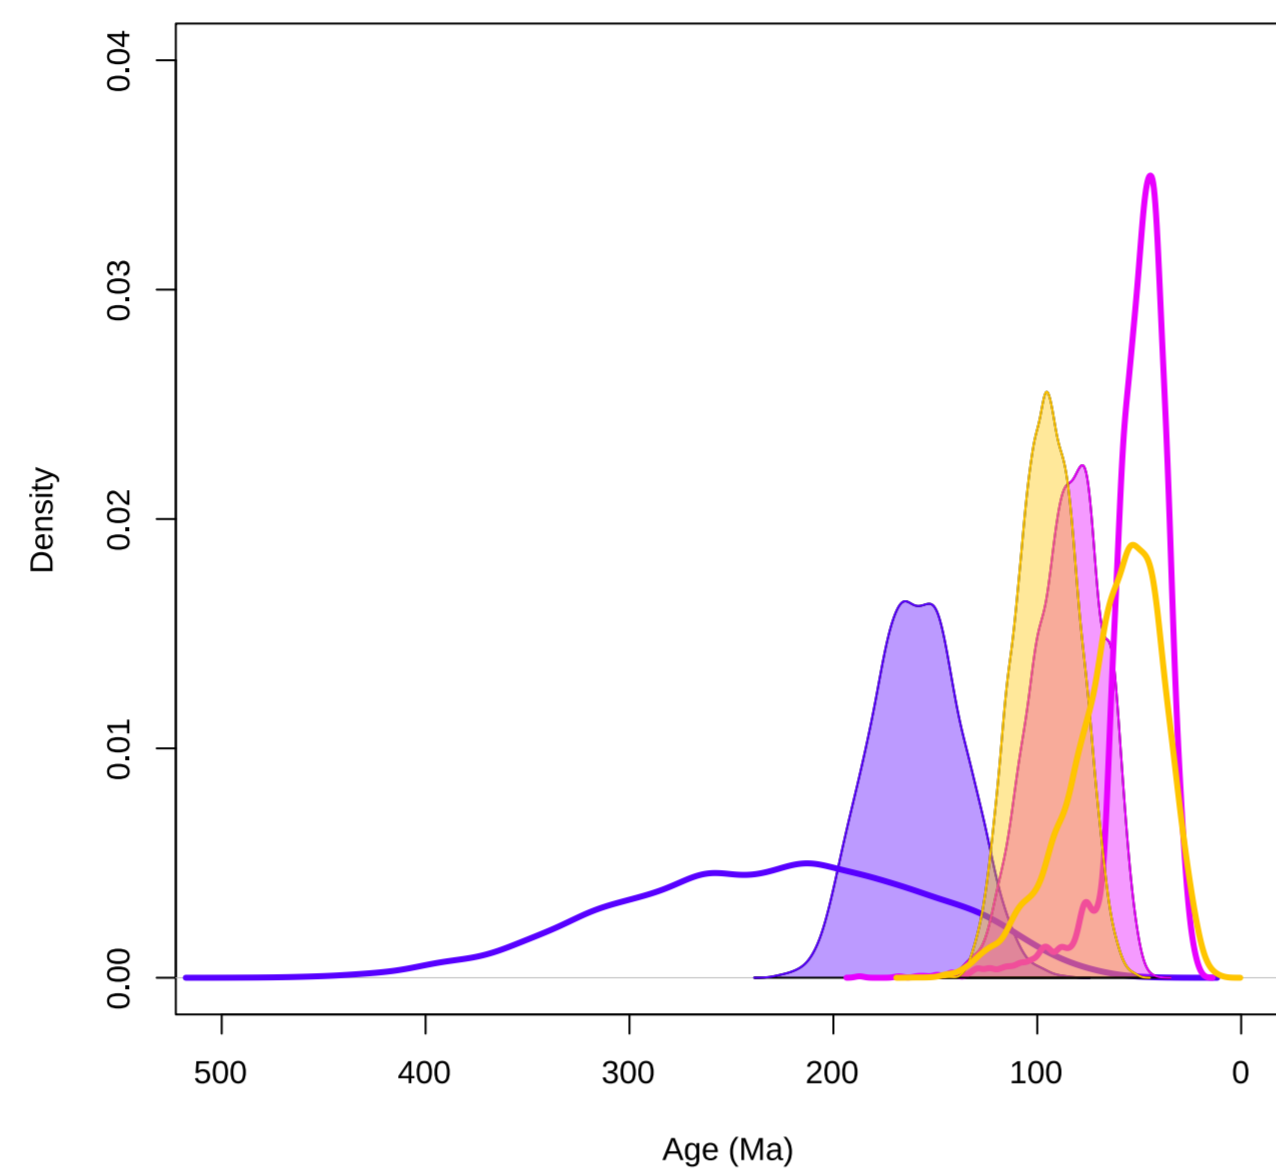

Brachiura

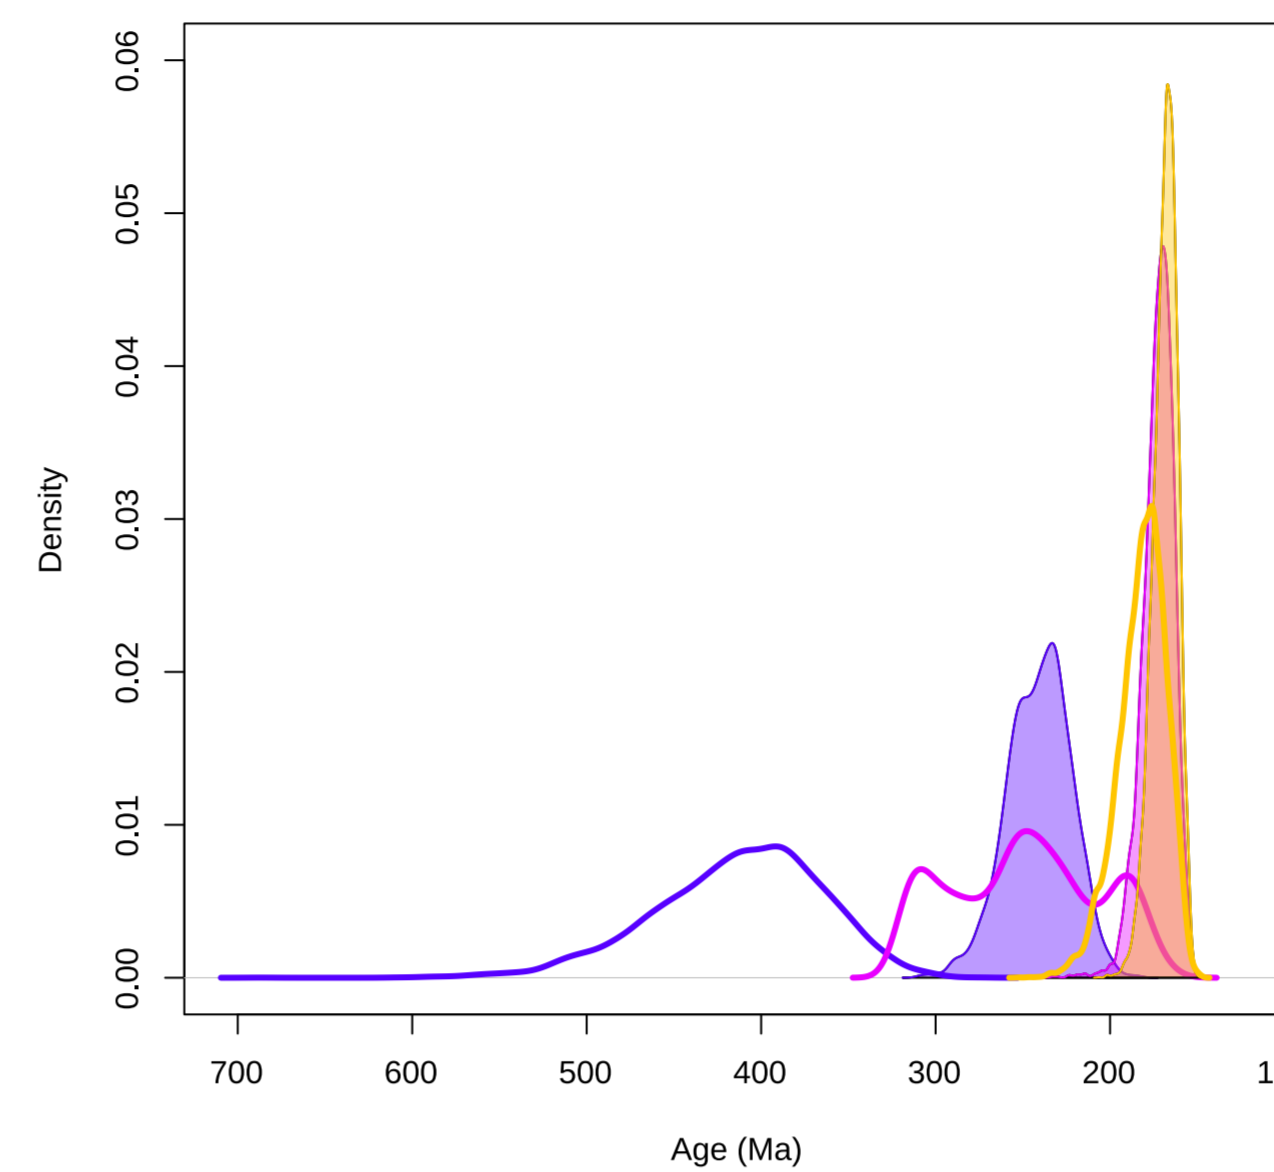

sensitive node #7: MRCA of Cyclodorippoidea + Eubrachiura

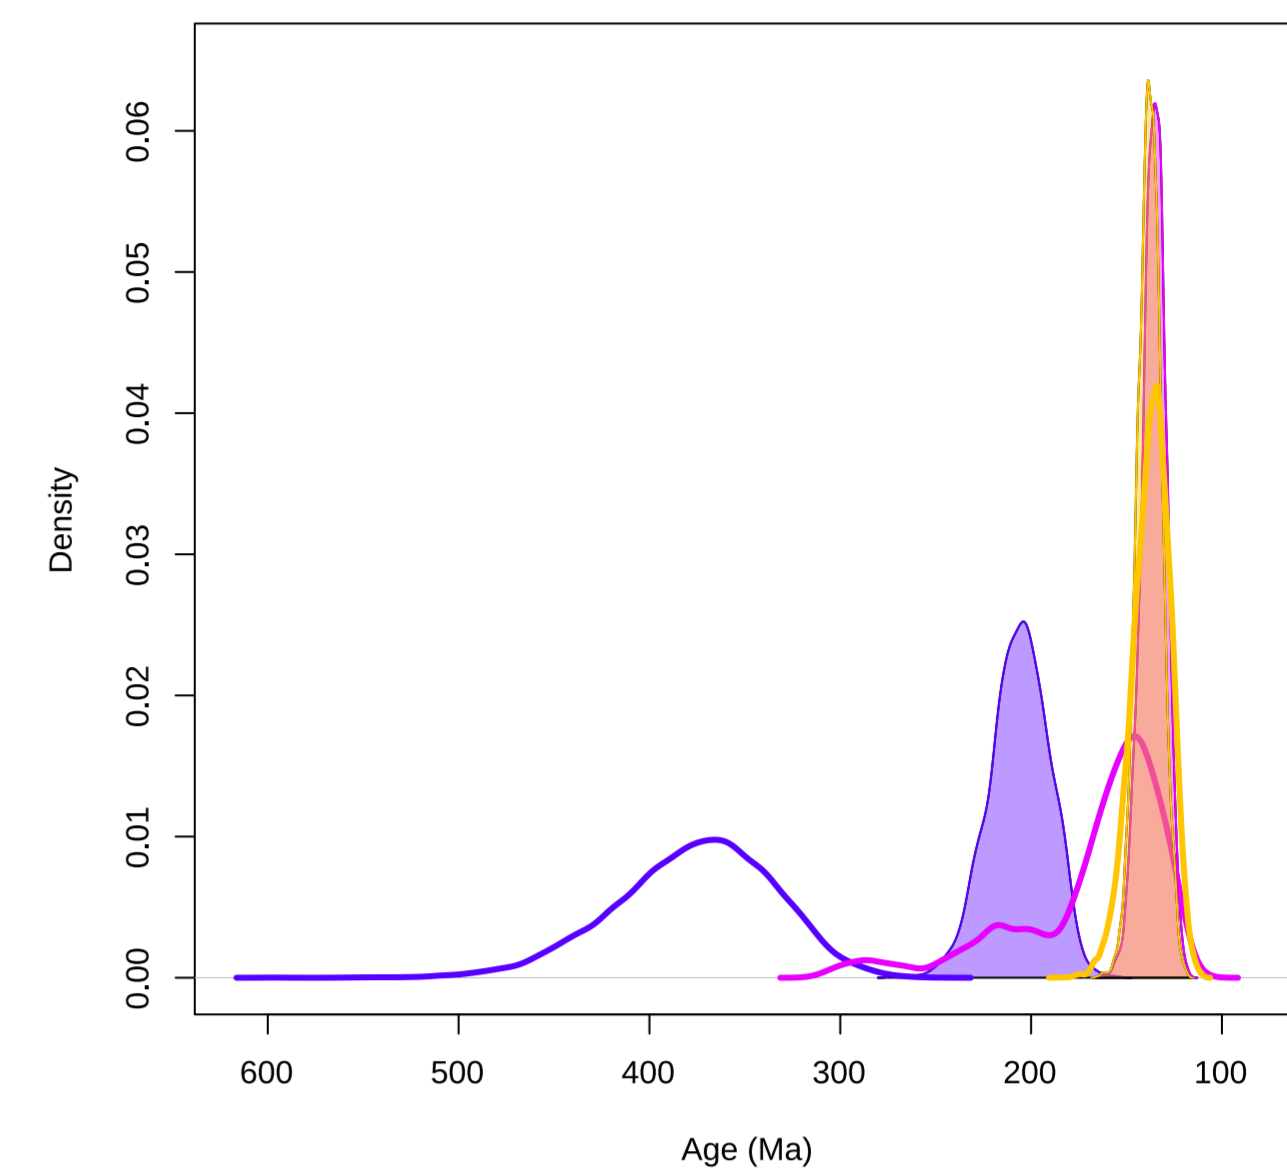

sensitive node #8: Dynomenidae

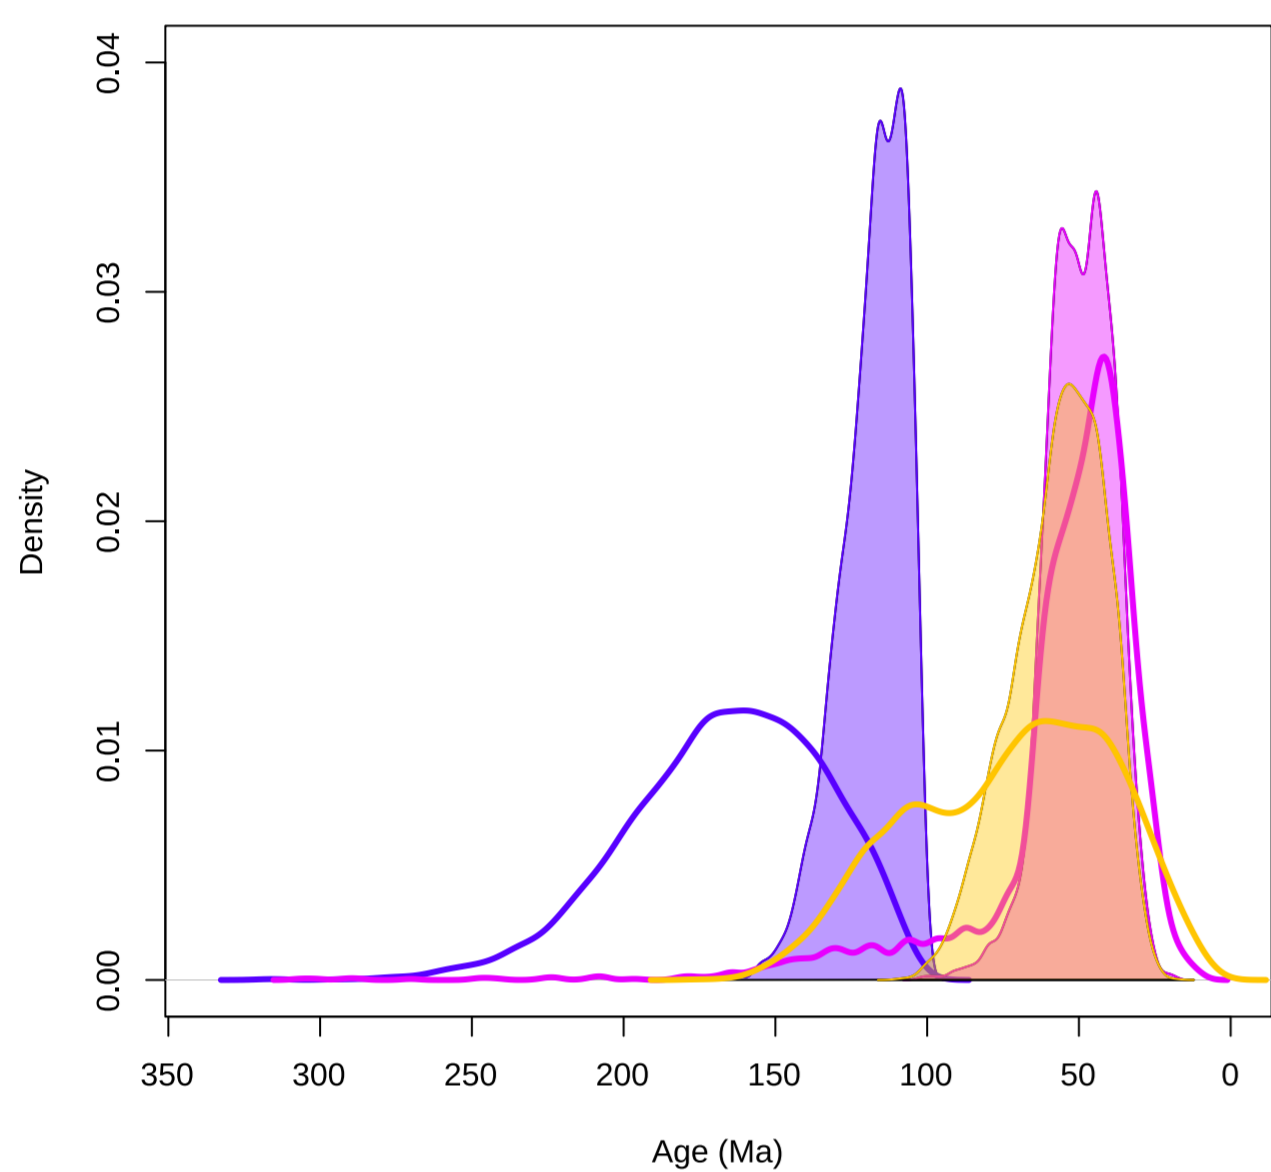

sensitive node #9: MRCA of Corycodus disjunctipes + Cymonimus diogenes

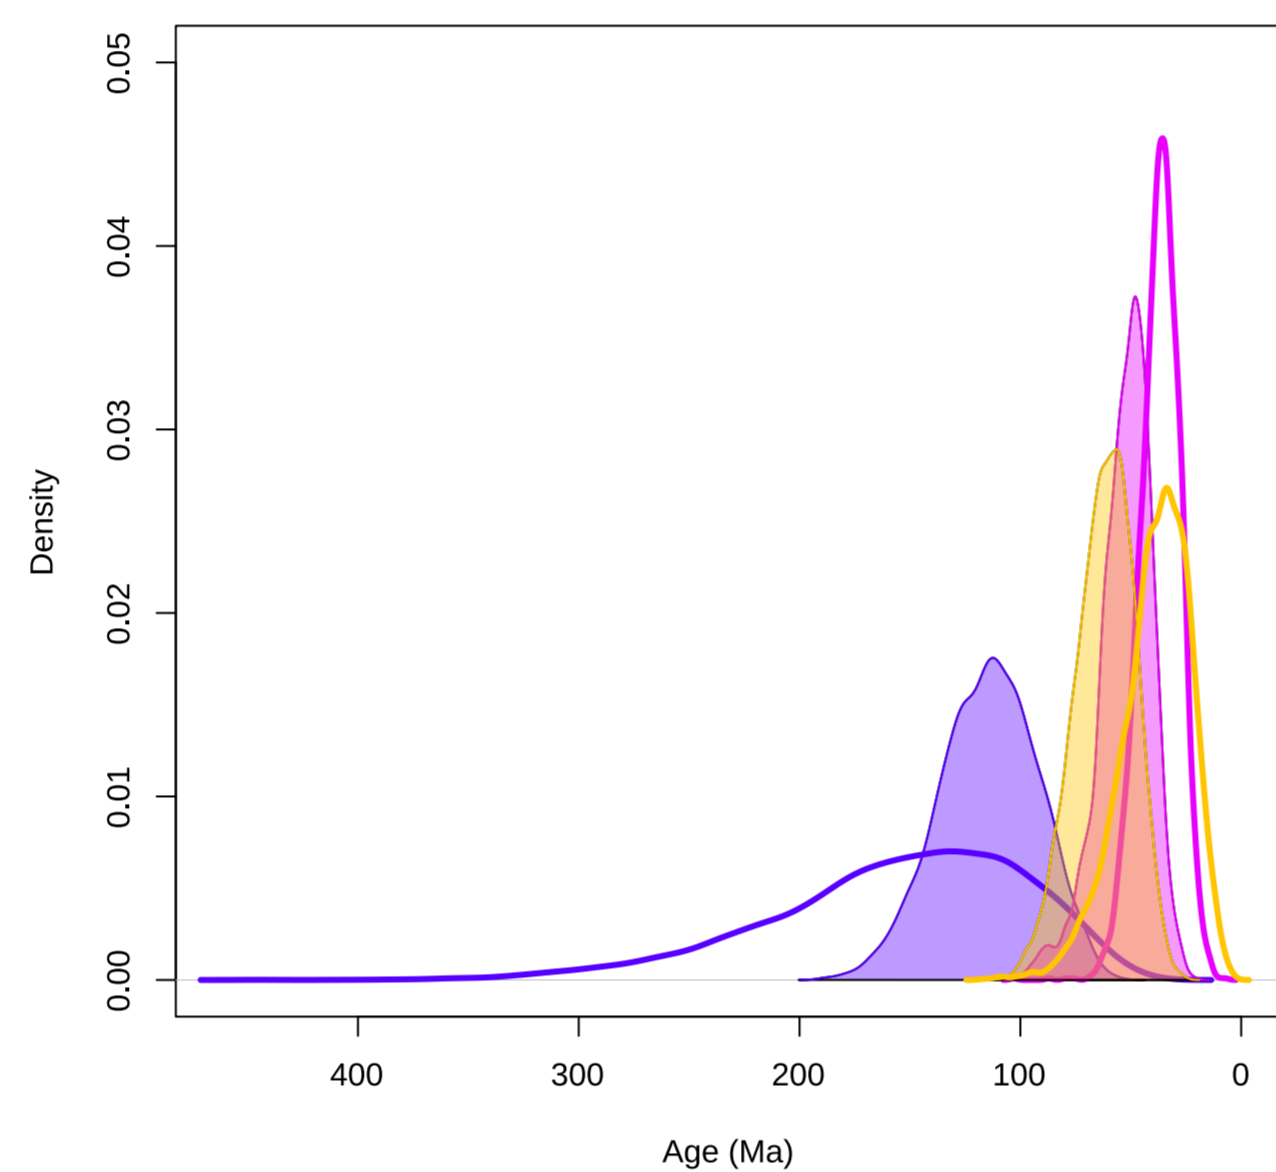

sensitive node #10: Dromiidae

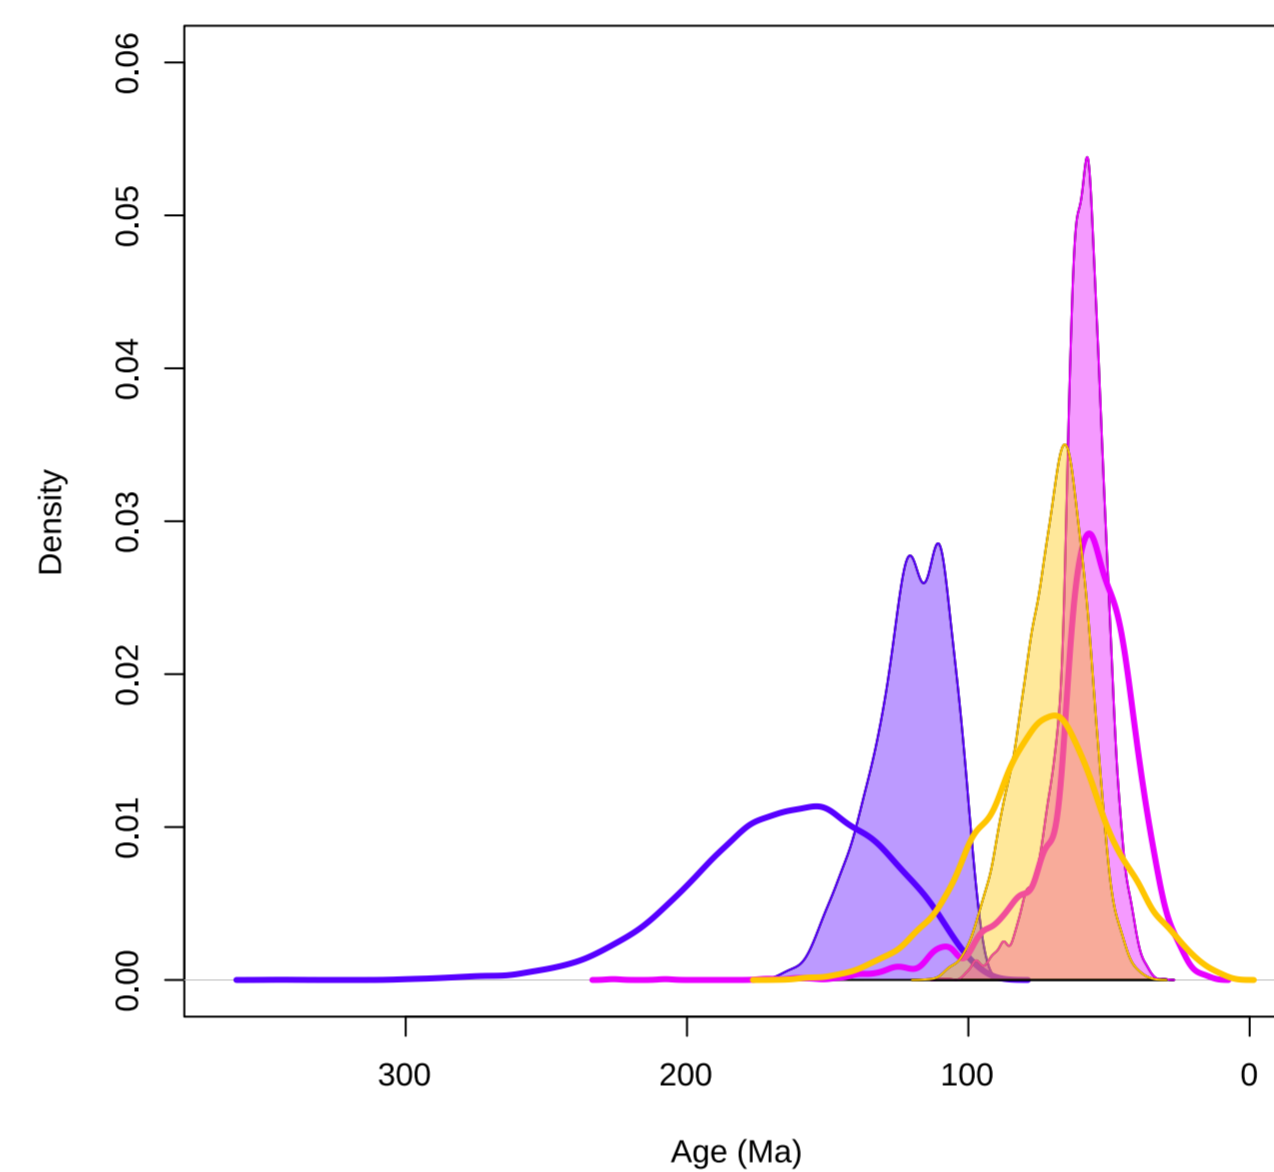

sensitive node #11: MRCA of Pilumnoides nudifrons + Pseudocarcinus gigas

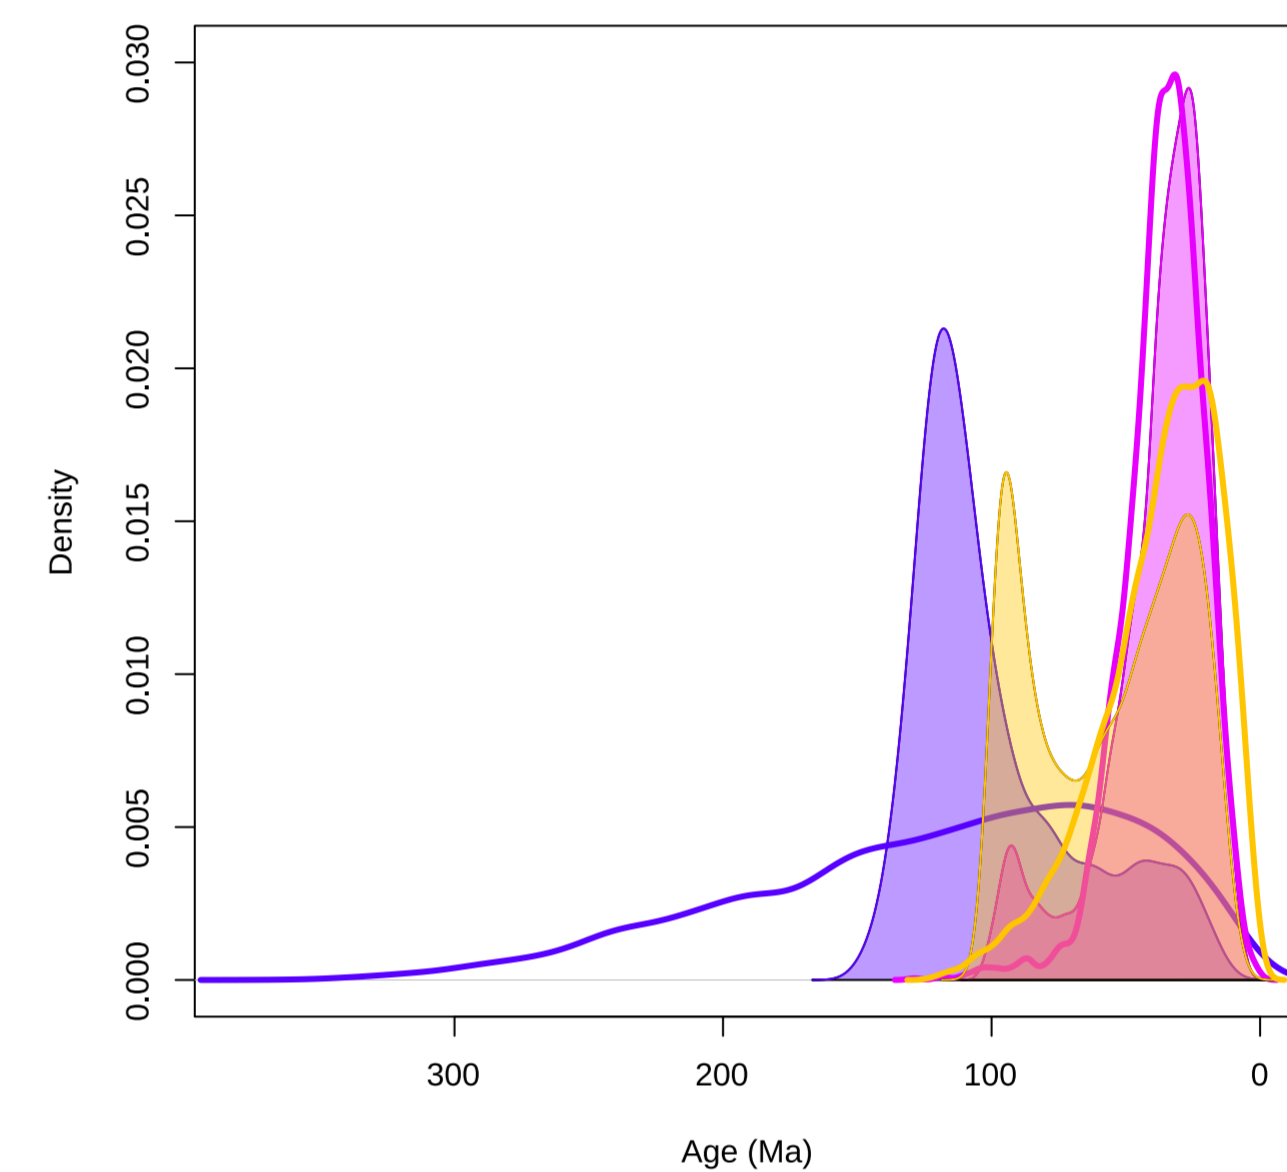

sensitive node #12: MRCA of African Eurasian freshwater + Thoracotremata

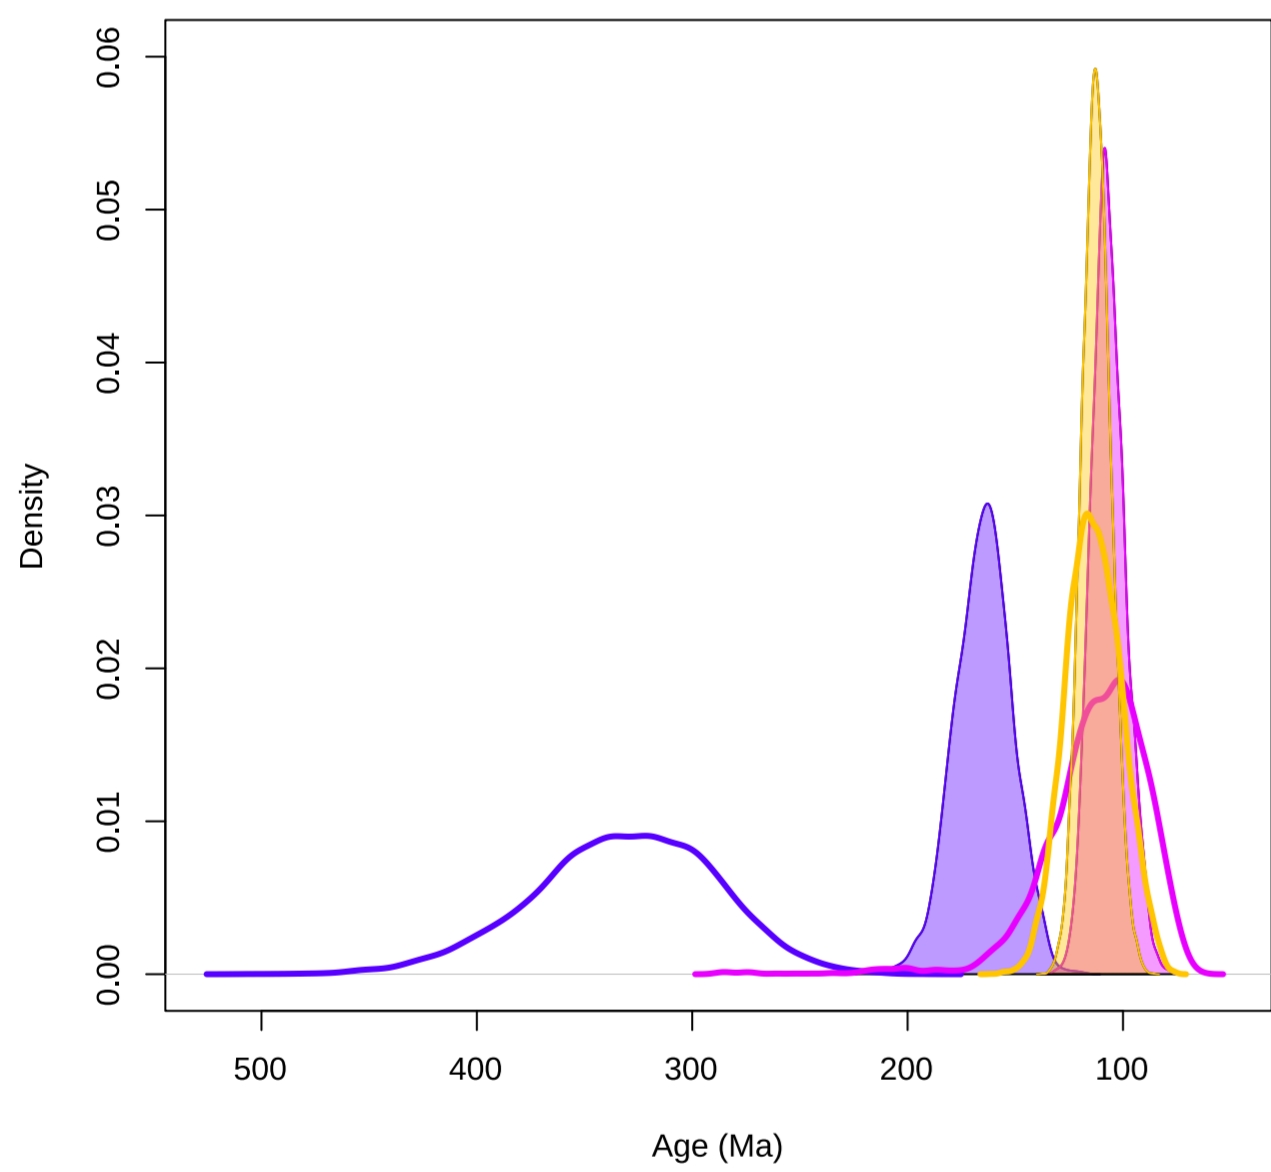

Eubrachiura

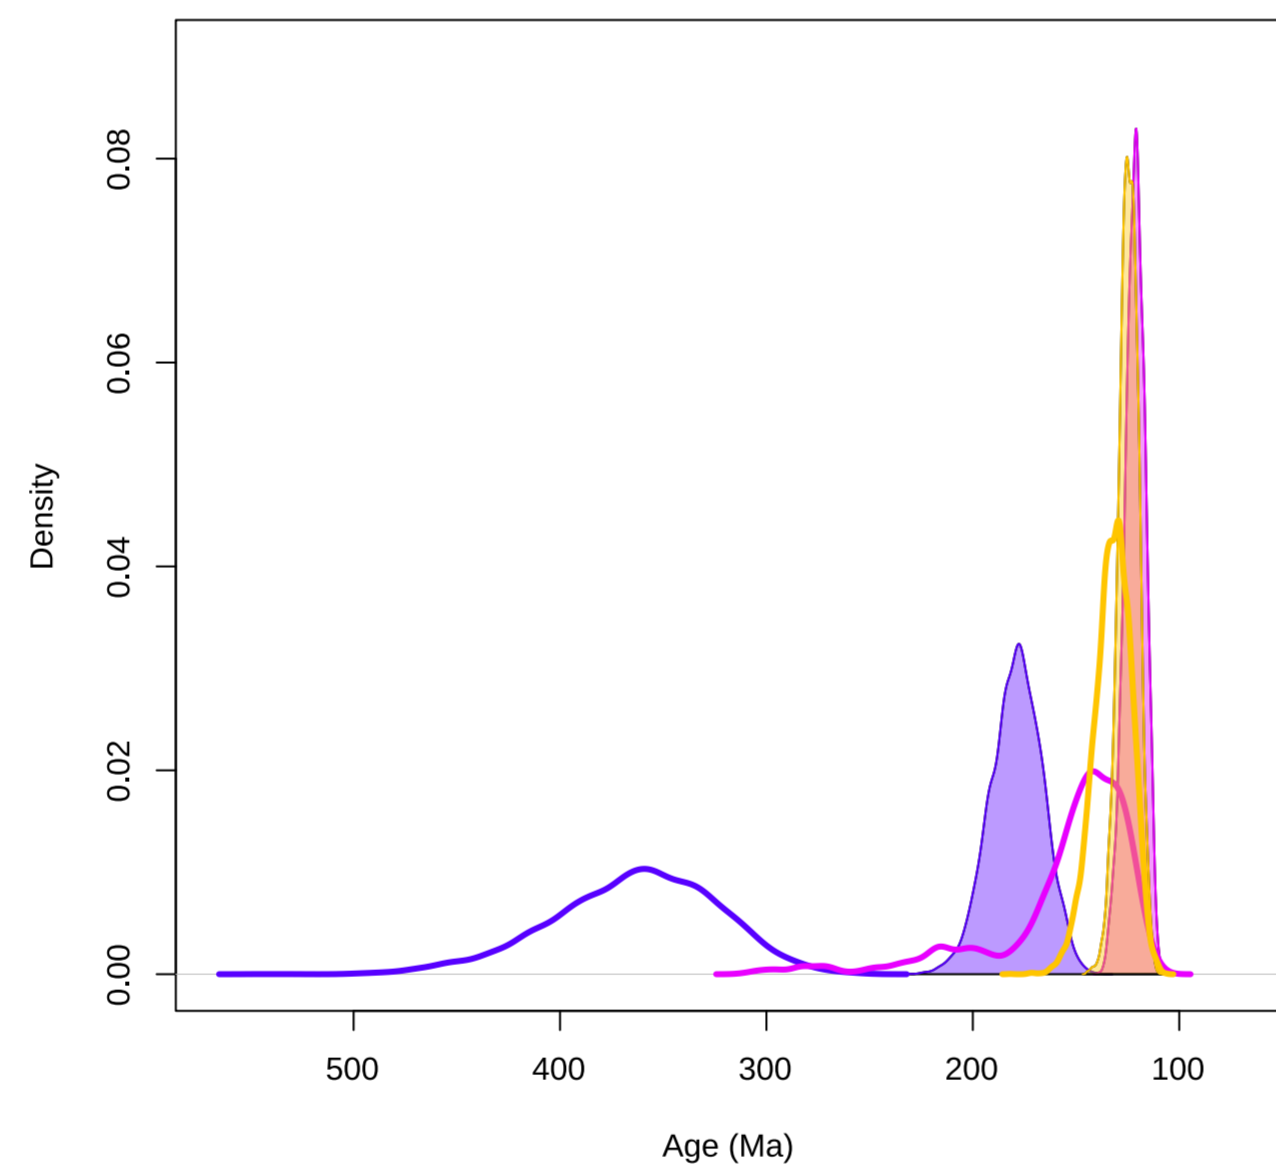

sensitive node #14: MRCA of Hymenosomatidae + African Eurasian freshwater

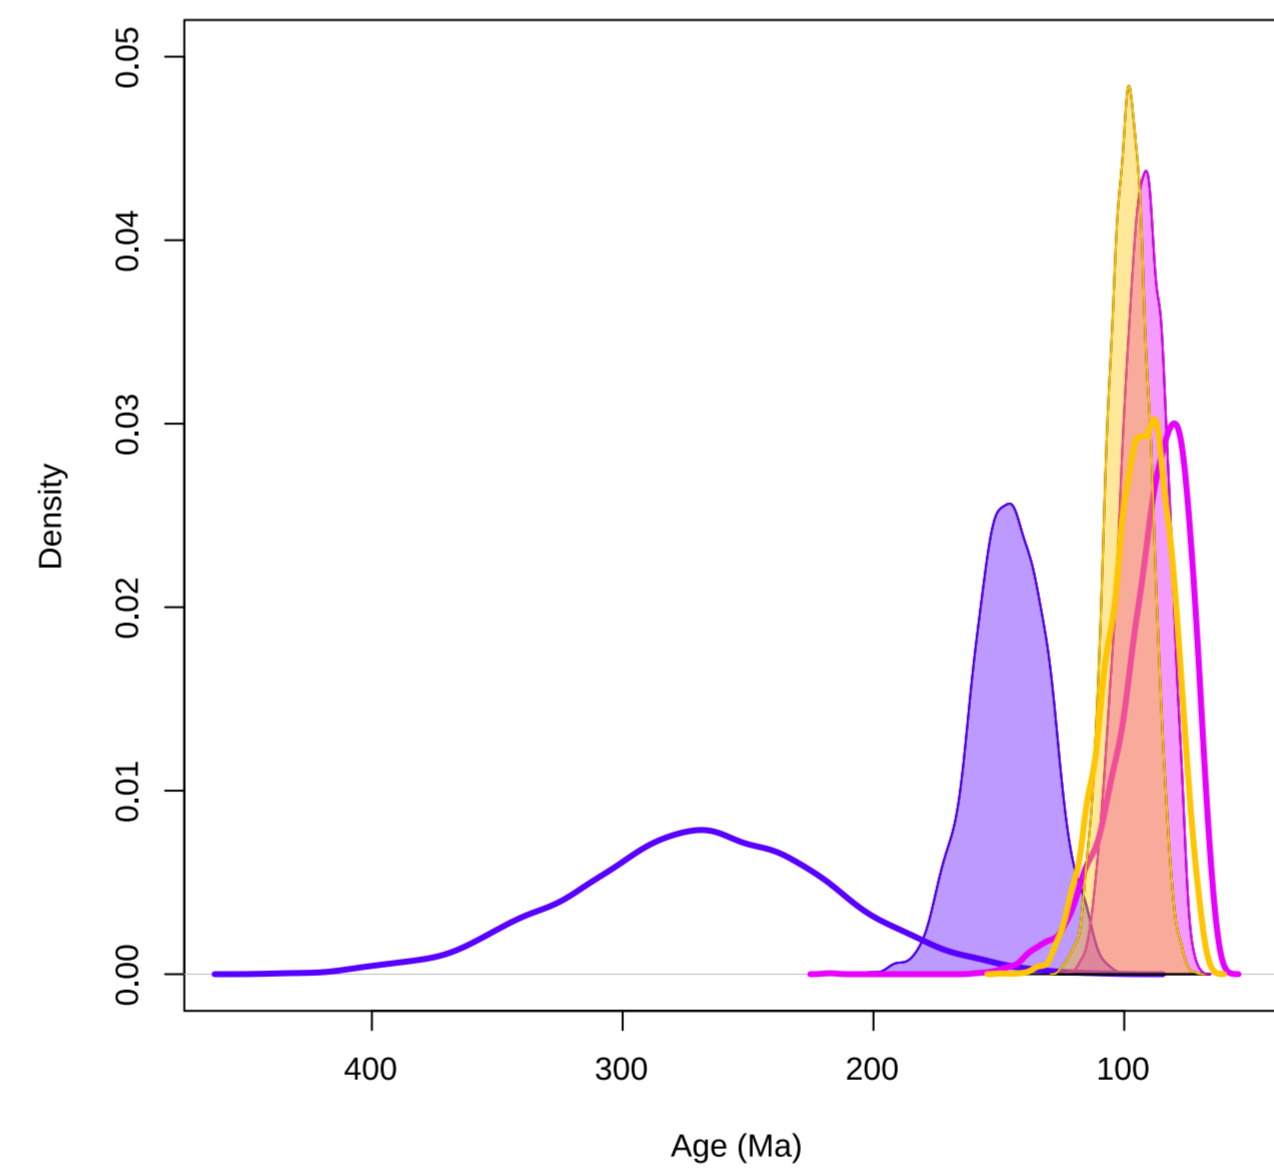

Thoracotremata

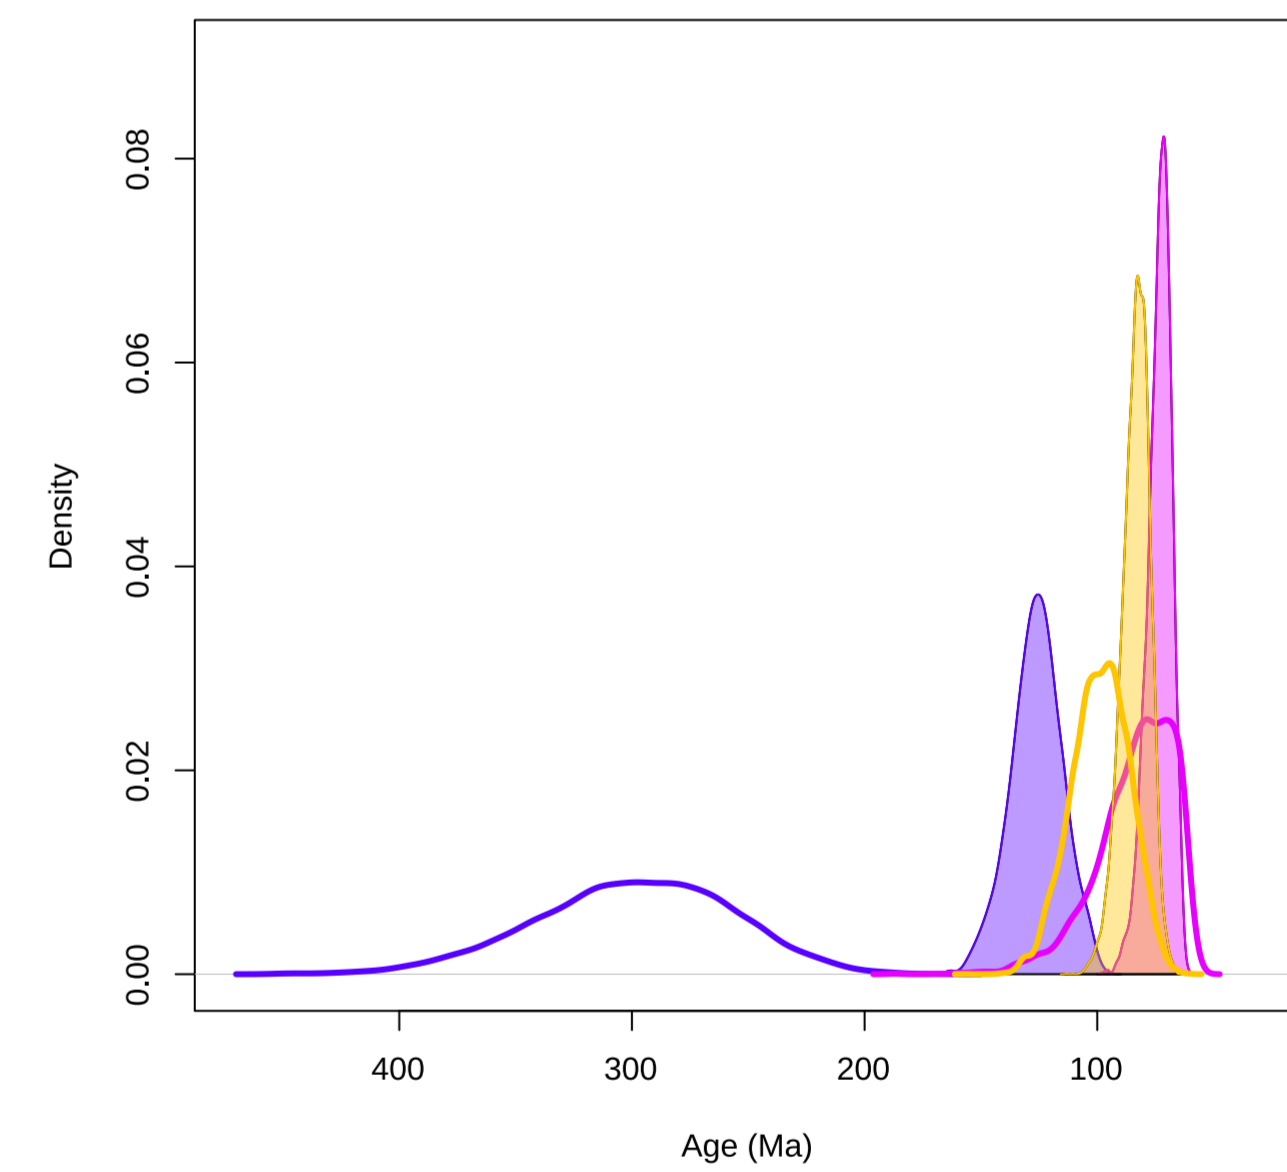

sensitive node #16: MRCA of Glyptograpsidae + Xenophthalmidae

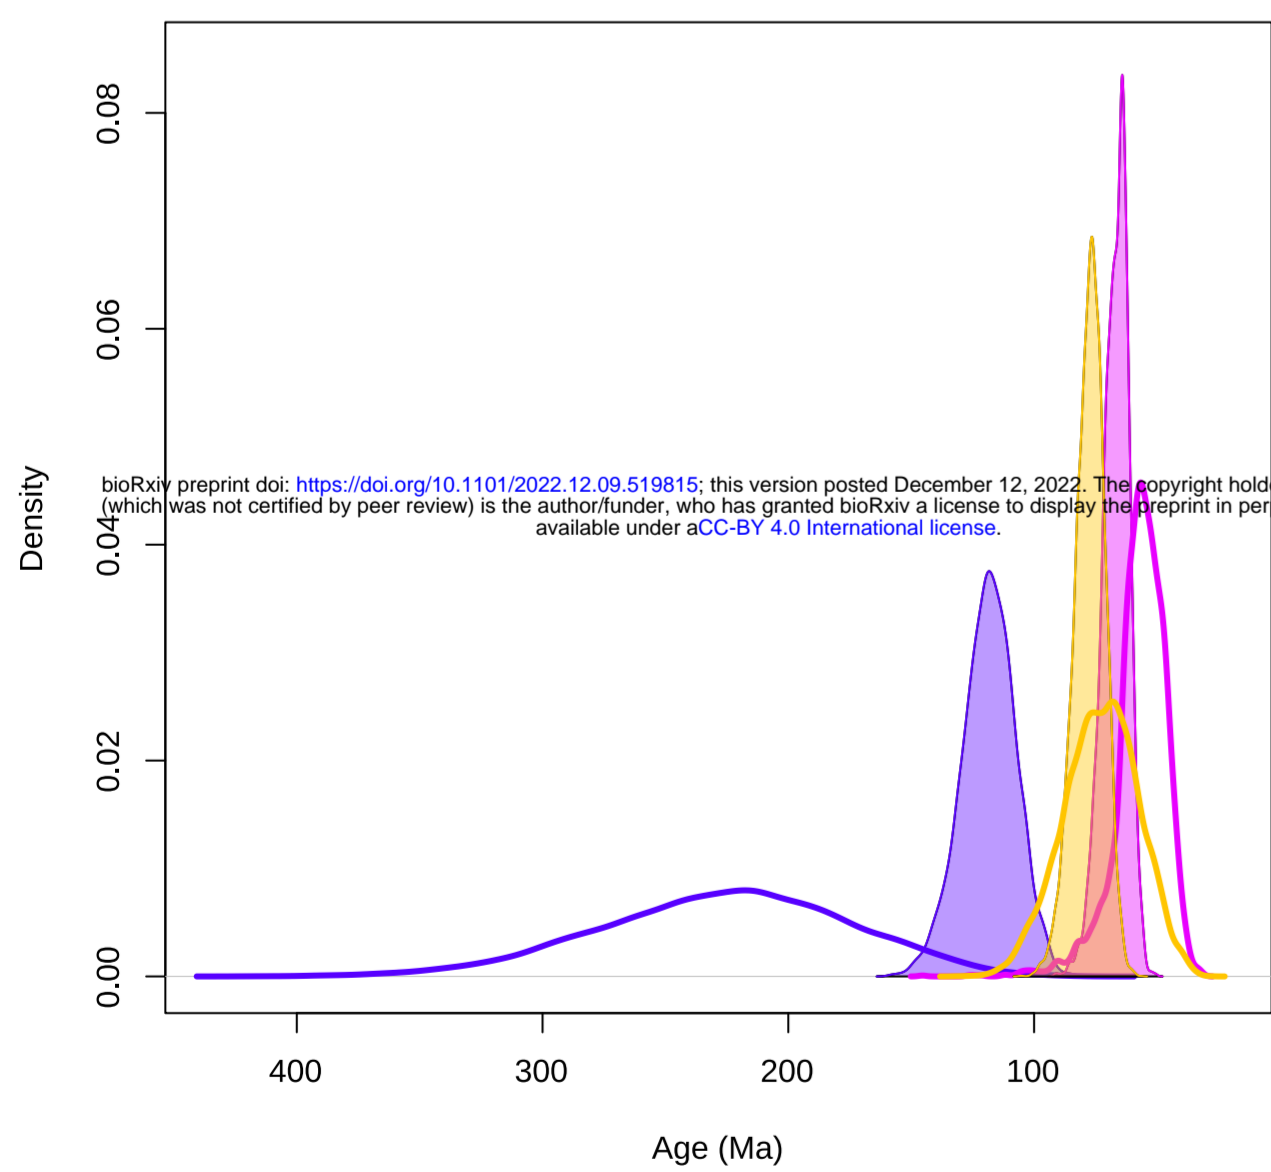

sensitive node #17: MRCA of Pseudothelphusoidea + Majoidea

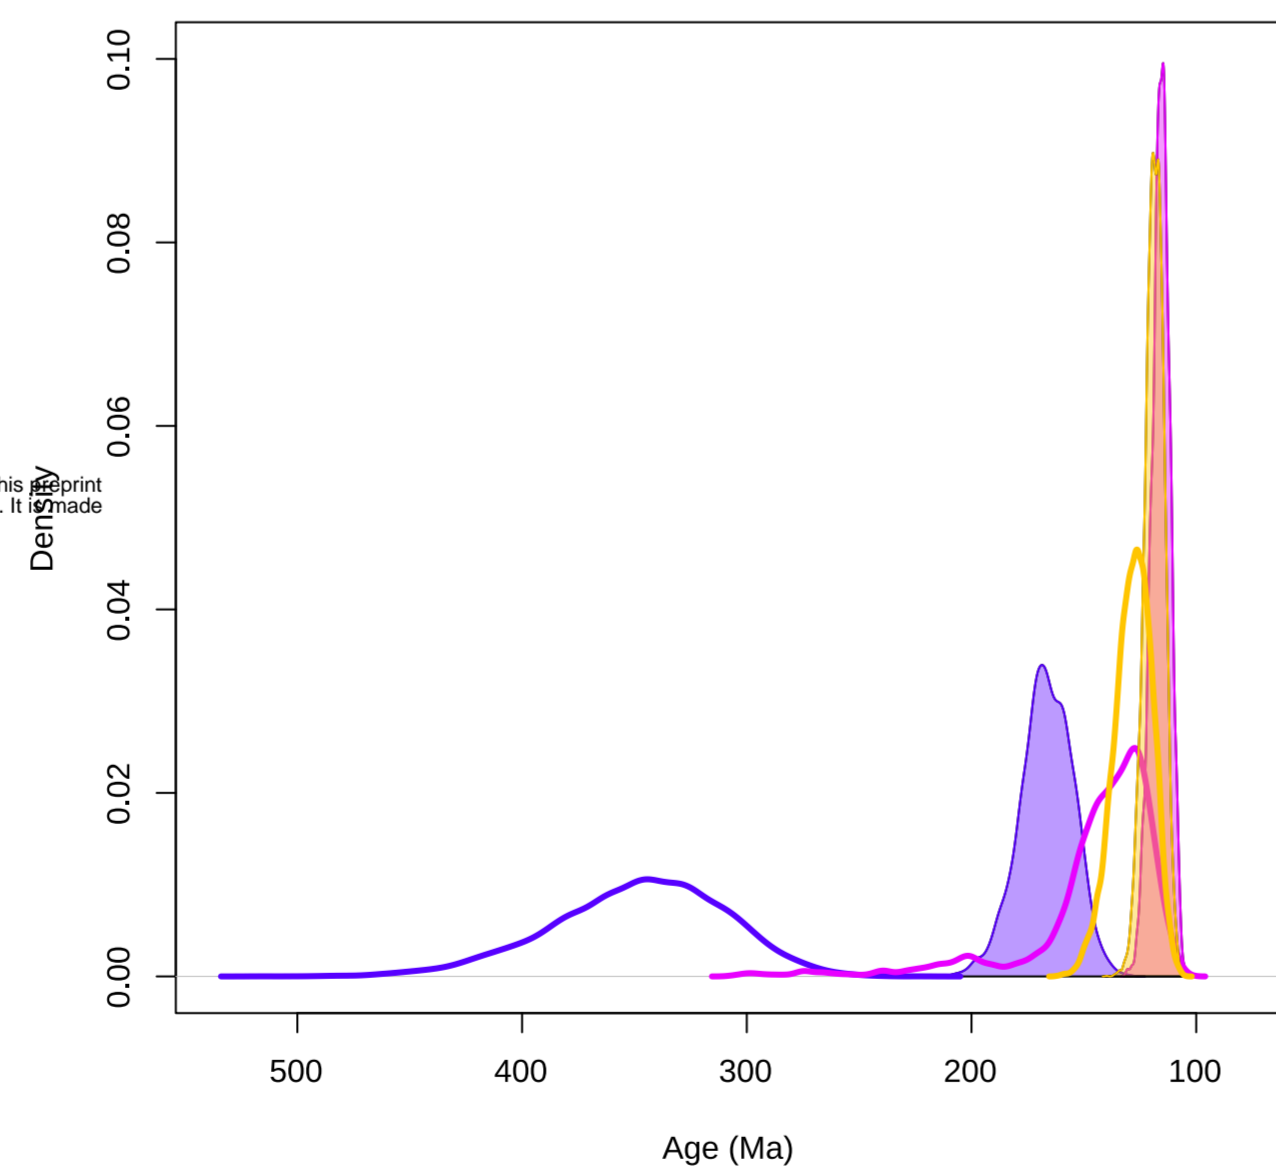

sensitive node #18: MRCA of Ocypodidae + Pinnotheridae

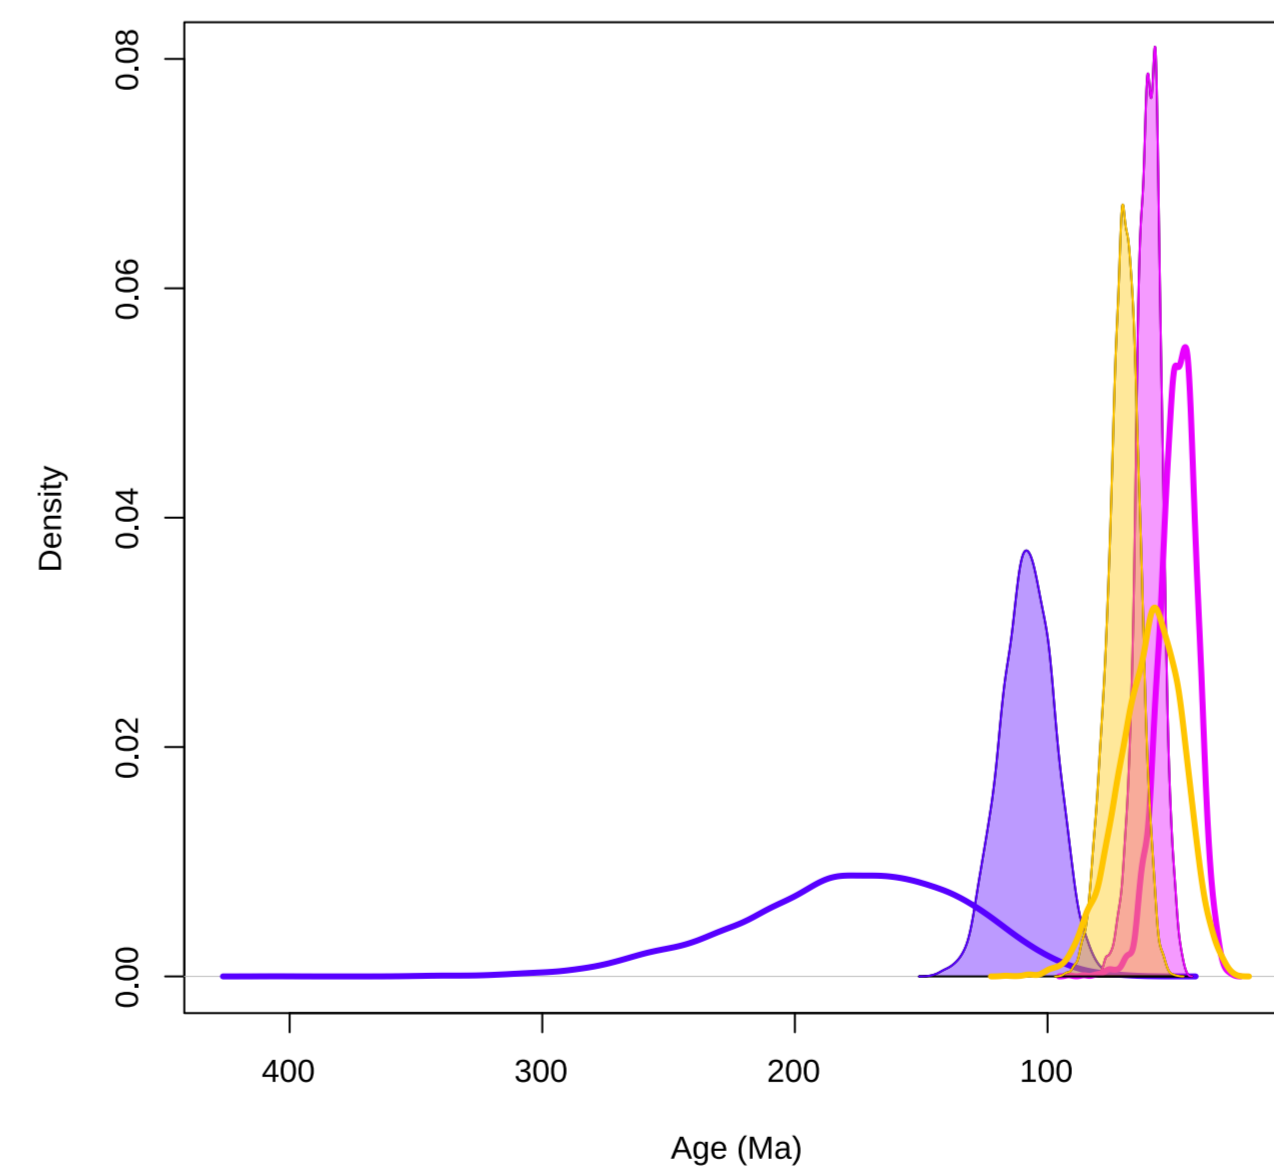

sensitive node #19: MRCA of Grapsidae + Dotillidae

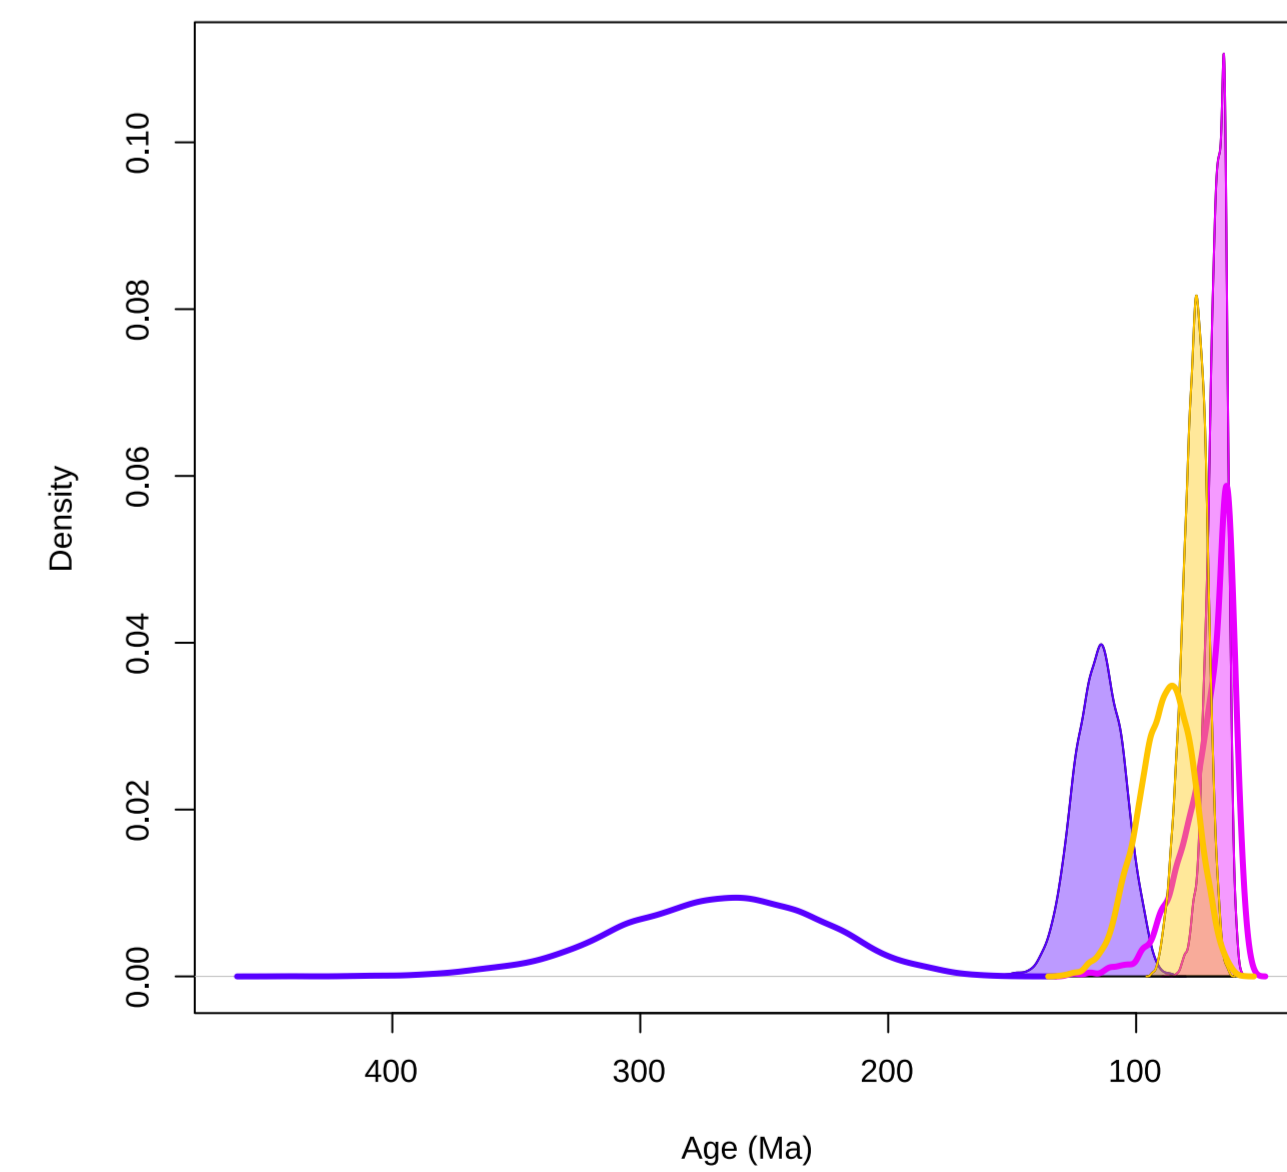

sensitive node #20: MRCA of Belloidea + Trapezioida

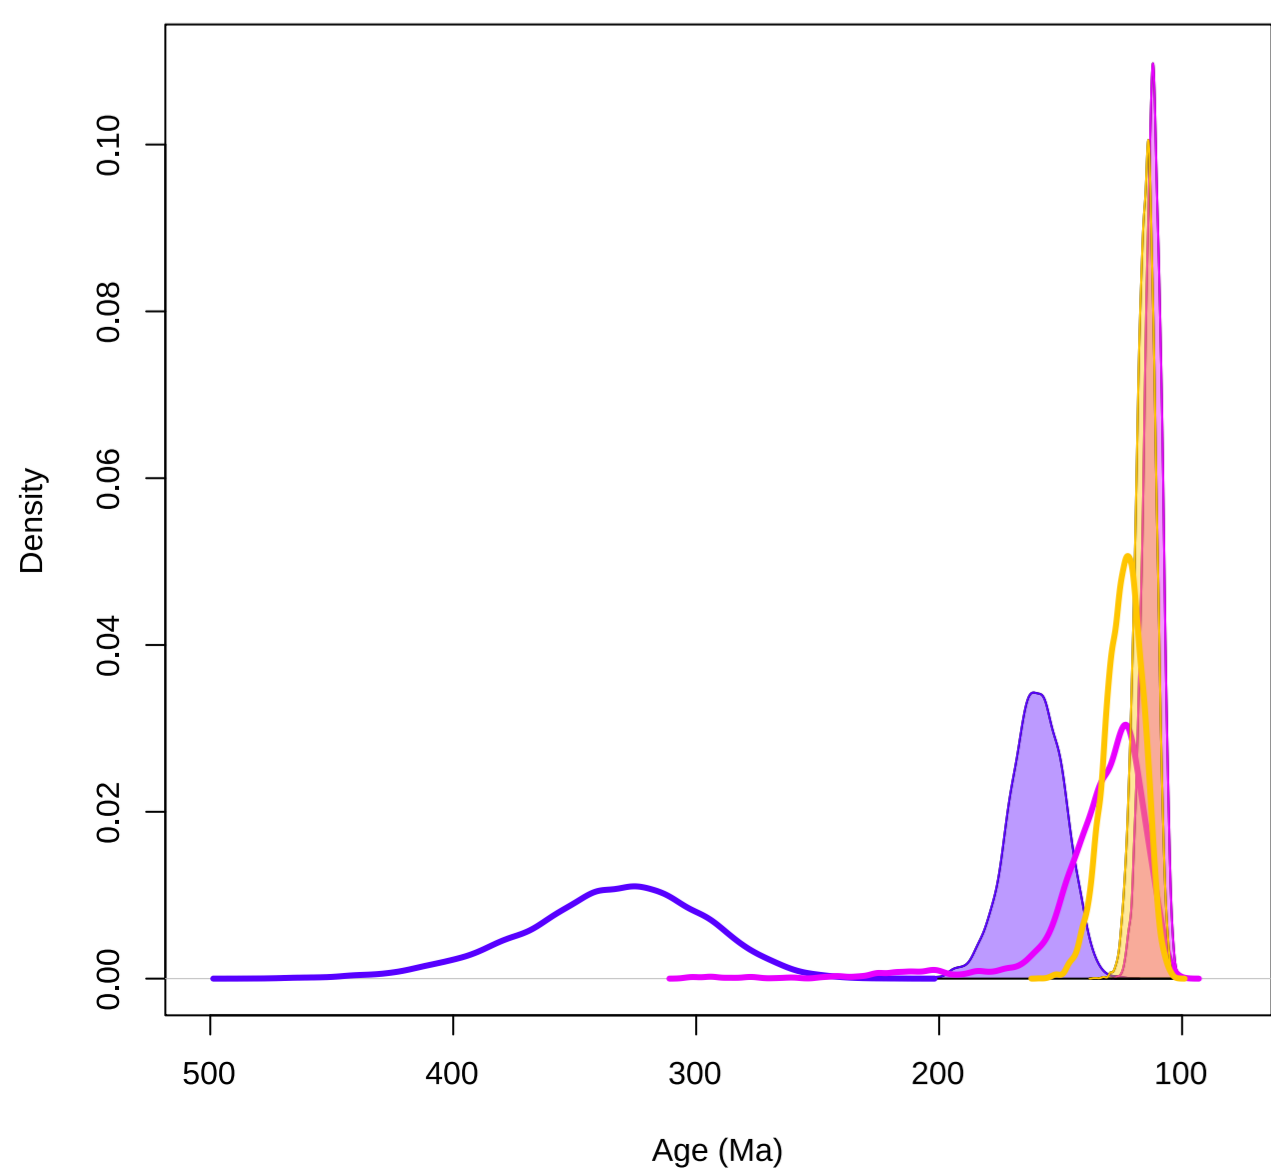

■ vetted calibrations  
■ FBD  
■ BDSS



250 201 145 100 56 0

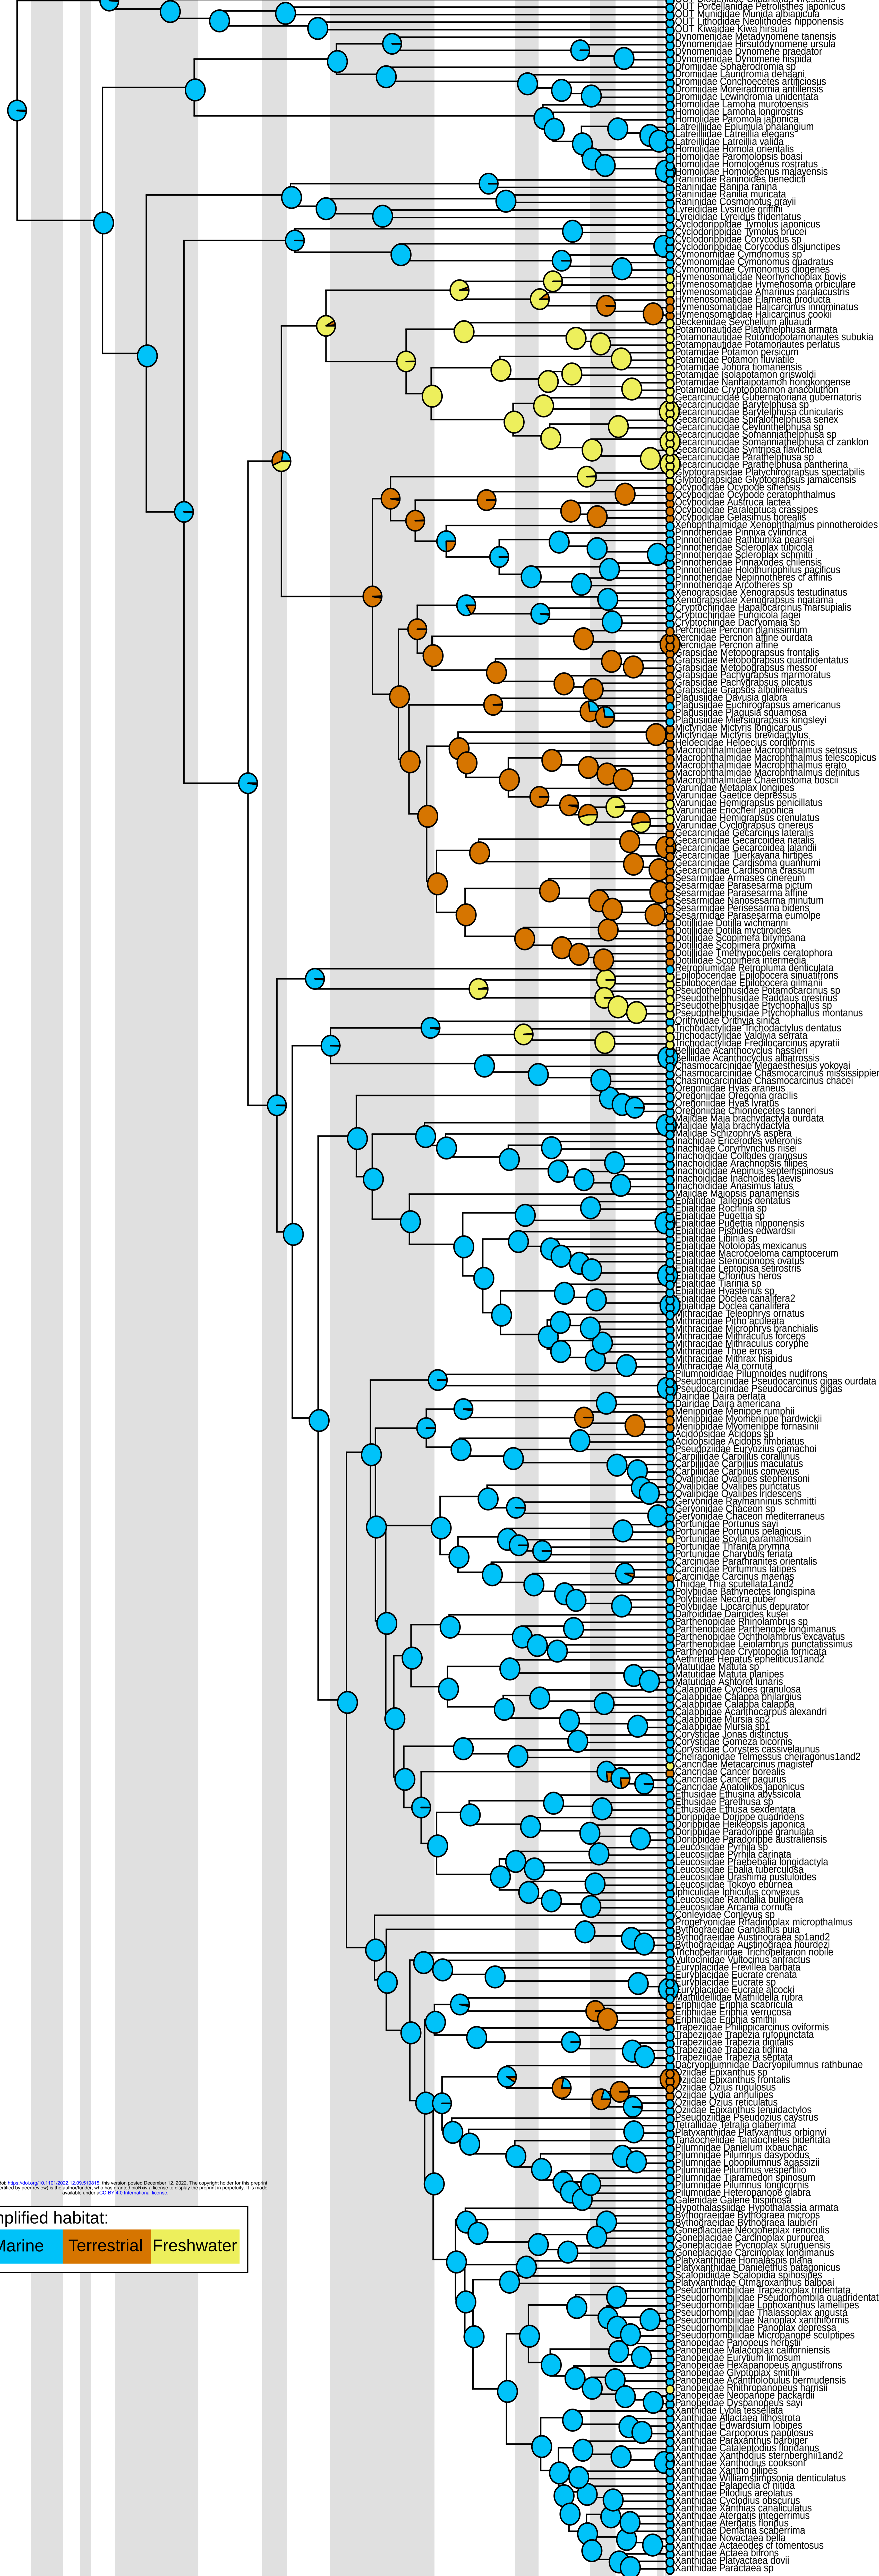

bioRxiv preprint doi: <https://doi.org/10.1101/2022.12.09.519815>; this version posted December 12, 2022. The copyright holder for this preprint (which was not certified by peer review) is the author/funder, who has granted bioRxiv a license to display the preprint in perpetuity. It is made available under aCC-BY 4.0 International license.

**Simplified habitat:**

|        |             |            |
|--------|-------------|------------|
| Marine | Terrestrial | Freshwater |
|--------|-------------|------------|

Permian Triassic Jurassic Cretaceous Paleogene Ng.

250 201 145 100 56 0

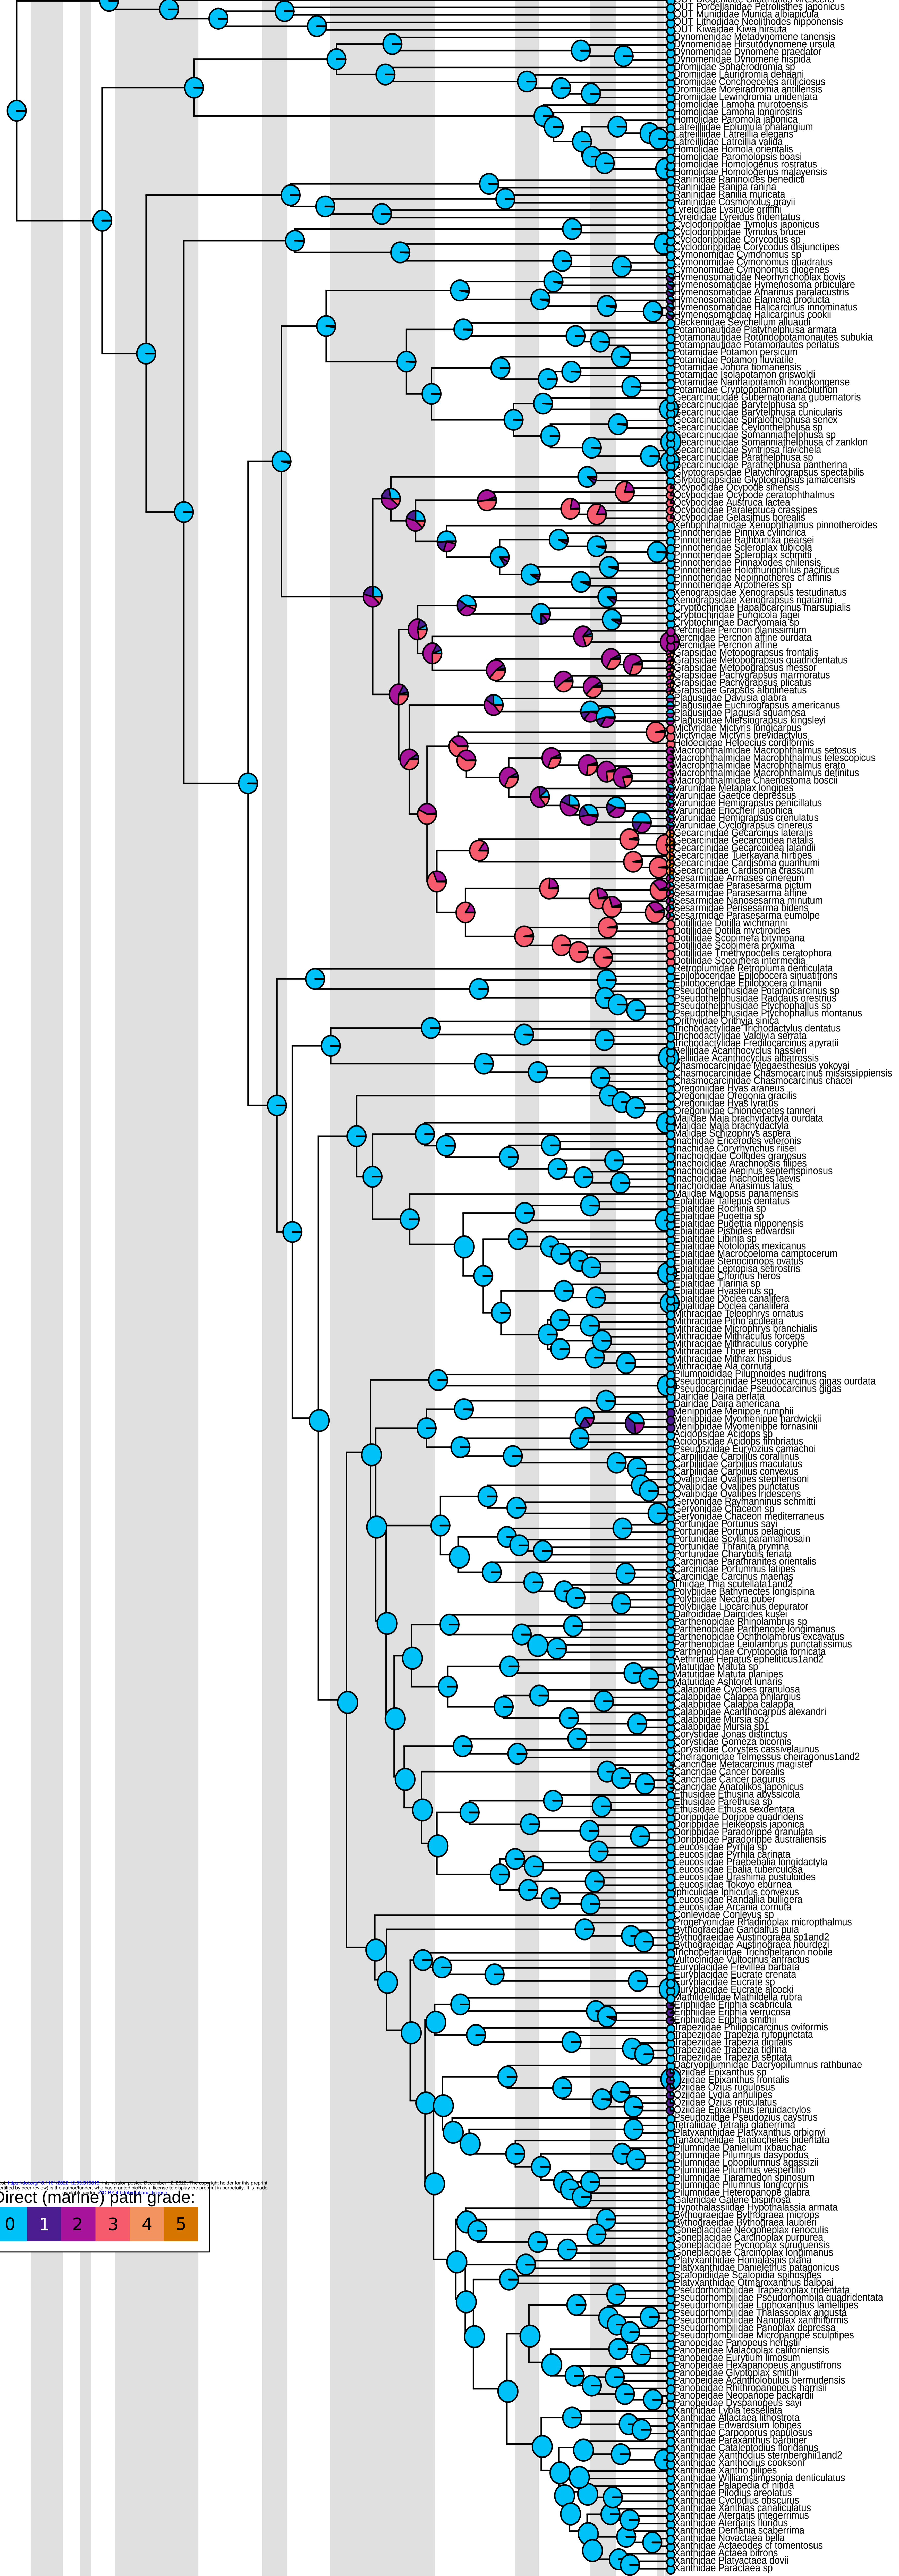

Direct (marine) path grade:

|   |   |   |   |   |   |
|---|---|---|---|---|---|
| 0 | 1 | 2 | 3 | 4 | 5 |
|---|---|---|---|---|---|

Permian Triassic Jurassic Cretaceous Paleogene Ng.

bioRxiv preprint doi: <https://doi.org/10.1101/2019.12.20.376999>; this version posted December 16, 2019. The copyright holder for this preprint (which was not certified by peer review) is the author/funder, who has granted bioRxiv a license to display the preprint in perpetuity. It is made available under aCC-BY-NC-ND 4.0 International license.

- OUT Hippidae Hippa adactyla
- OUT Dibbenidae Clibanarius virescens
- OUT Porcellanidae Petrolisthes japonicus
- OUT Munnidae Munida aboripicola
- OUT Ithoidae Ithobita nipponensis
- OUT Kiwaidae Kiwa hirsuta
- Dynomeneidae Metadynomene tanensis
- Dynomeneidae Metadynomene ursula
- Dynomeneidae Dynomene praedator
- Dynomeneidae Dynomene hispida
- Dromidae Sphaerodroma sp.
- Dromidae Dromia delatani
- Dromidae Conchoecetes artificiosus
- Dromidae Moreiradroma anbilensis
- Dromidae Lewinodroma undulata
- Lamohidae Lamoha murotoensis
- Lamohidae Lamoha longirostris
- Lamohidae Lamoha japonica
- Latreilliidae Latreilla validula
- Latreilliidae Latreilla elegans
- Latreilliidae Latreilla validula
- Homolidae Homologenus rosiratus
- Homolidae Homologenus rosiratus
- Homolidae Homologenus malayensis
- Raninidae Ranina ranina
- Raninidae Ranina muricata
- Raninidae Ranina grayii
- Lyridae Lystrude griffini
- Lyridae Lyreidus tridentatus
- Cycloporidae Cycloporus japonicus
- Cycloporidae Cycloporus urceolus
- Cycloporidae Cycloporus sp.
- Cycloporidae Cycloporus disjunctipes
- Cymonidae Cymonimus sp.
- Cymonidae Cymonimus quadratus
- Cymonidae Cymonimus diogenes
- Ymenosomatidae Neorhynchobrax boyis
- Ymenosomatidae Ymenosoma orbicularis
- Ymenosomatidae Ymenosoma paracultrix
- Ymenosomatidae Elamena producta
- Ymenosomatidae Ymenosoma inominatus
- Ymenosomatidae Halicarcinus cookii
- Seckenidae Seychellium aluaidi
- Potamonautidae Potamonautus armata
- Potamonautidae Potamonautus subukia
- Potamonautidae Potamonautus perlatus
- Potamidae Potamon persicum
- Potamidae Potamon fluviatile
- Potamidae Johora tomanensis
- Potamidae Isolapotamon griseoidi
- Potamidae Potamon honkongense
- Potamidae Cryptopotamon anacoluthon
- Gubernatoridae Gubernatoriana gubernatoris
- Barytelphusa sp.
- Spiralothelphusa senex
- Ceylonthelphusa sp.
- Somaniathelphusa sp.
- Somaniathelphusa cf. zanklon
- Syntripsa flavichela
- Arathelphusa sp.
- Parathelphusa pantherina
- Platychoirapsidae Platychoirapsus spectabilis
- Glyptograpsidae Glyptograpsus jamaicensis
- Glyptograpsidae Glyptograpsus silvaticus
- Ocyrodidae Ocyrodia ceratophthalmus
- Ocyrodidae Austruca lactea
- Paraleptuca crassipes
- Xenophthalmidae Xenophthalmus pinnotheroides
- Pinnixia cylindrica
- Pinnixia pearii
- Scleroplax tubicola
- Scleroplax schmitti
- Pinnaxoidea chilensis
- Pinnaxoidea pacificus
- Nepinotheres cf. affinis
- Nepinotheres sp.
- Xenograpsus testudinatus
- Xenograpsus ngatama
- Hapalocarcinus marsupialis
- Fungicola lajei
- Percnium planissimum
- Percnium affine ourdata
- Percnium planissimum
- Metopograpsus frontalis
- Metopograpsus quadridentatus
- Metopograpsus messor
- Metopograpsus marmoratus
- Pachygrapsus plicatus
- Grapsus albolineatus
- Plagusia diabra
- Euchirograpsus americanus
- Plagusia squamosa
- Misograpsus kingsleyi
- Misograpsus longirostris
- Mictyris brevidactylus
- Helocercus cordiformis
- Macrophthalmidae Macrophthalmus setosus
- Macrophthalmidae Macrophthalmus telescopicus
- Macrophthalmidae Macrophthalmus erato
- Macrophthalmidae Macrophthalmus definitus
- Macrophthalmidae Macrophthalmus bosci
- Metaplex longipes
- Gaetice depressus
- Eniocheir japonica
- Hemigrapsus crenulatus
- Cyclograpsus cinereus
- Cecarchoidea natalis
- Cecarchoidea natalis
- Cecarchoidea alandii
- Tuerkayana hirtipes
- Cardisoma granthumi
- Cardisoma crassum
- Parasesarma cinereum
- Parasesarma pumilum
- Parasesarma affine
- Nanosesarma minutum
- Parasesarma bifidum
- Parasesarma eumolpe
- Dotilla wichmanni
- Dotilla myctroides
- Dotilla blythiana
- Scobimera proxima
- Scobimera intermedia
- Scobimera denticulata
- Epilobocera sinuatifrons
- Epilobocera sinuatifrons
- Potamiscus japonicus
- Raddusa orestris
- Ptychophallus sp.
- Ptychophallus montanus
- Orithyia sinica
- Trichodactylus dentatus
- Trichodactylus serratus
- Trichodactylus apyrtii
- Acanthocyclus hassleri
- Acanthocyclus albatrossis
- Chasmocarcinus mississippiensis yokoyai
- Chasmocarcinus mississippiensis chacei
- Chasmocarcinus araneus
- Oregonia gracilis
- Oregonia hyas lyratus
- Chionoecetes tanneri
- Maja brachydactyla ourdata
- Maja brachydactyla
- Schizophrys aspera
- Ericodius veloxis
- Corythichus dielii
- Collodes granosus
- Arachnopsis filipes
- Achnanopsis granosus
- Inachoides laevis
- Anasimus latus
- Margopsis panamensis
- Rollepus dentatus
- Rochinia sp.
- Pugetia sp.
- Heleptopus nipponensis
- Pisoides edwardsii
- Notopias mexicanus
- Notopias mexicanus
- Macrocoeloma campocerum
- Leptopias setirostris
- Chorinus heros
- Hyasterius sp.
- Doclea canalifera
- Doclea canalifera
- Teleophrys ornatus
- Pino aculeata
- Microphrys franchialis
- Mithraculus forceps
- Mithraculus coryphe
- Theerosia
- Mithrax hispidus
- Aia cornuta
- Plumoides nudifrons
- Pseudocarcinus gigas ourdata
- Pseudocarcinus gigas
- Daira peralta
- Daira americana
- Menippe rumphii
- Myomenippe hardwickii
- Myomenippe fornasinii
- Acidops limbriatus
- Euryozus gamachoi
- Carbilus convexus
- Carbilus maculatus
- Ovalipes stephensoni
- Ovalipes punctatus
- Ovalipes iridescens
- Raymanninus schmitti
- Chaceon mediterraneus
- Chaceon mediterraneus
- Portunus sayi
- Portunus peragicus
- Scylla palamosain
- Thranita pyrma
- Charypoides ferata
- Paranthites orientalis
- Portunus latipes
- Carcinus maenas
- Thig sculptata ourdata
- Rhyacionis longispina
- Necora puber
- Libinia depressa
- Rhinolambrus sp.
- Parthenopidae Rhinolambrus sp.
- Parthenopidae Parthenope longimanus
- Parthenopidae Parthenope excavatus
- Parthenopidae Leiolambrus punctatissimus
- Cryptopodia fornicata
- Hepatus epheliticus land2
- Matuta planipes
- Matuta planipes
- Cyclops granulosus
- Calappa bialgus
- Calappa calappa
- Acanthocarpus alexandri
- Mursia sp1
- Jonas distinctus
- Corystes bicoloratus
- Corystes cassivelaunus
- Telmessus cheiragonus land2
- Metacarcinus magister
- Cancer borealis
- Cancer pagurus
- Anatolikos japonicus
- Parathais abyssicola
- Parathais sp.
- Ethusa sexdentata
- Dorippe quadridentata
- Paradorippe granulata
- Paradorippe australiensis
- Pyrhia sp.
- Pyrhia carinata
- Præbebalia longidactyla
- Eubalia tuberculata
- Trachinotus tuberculoides
- Yokoye eburnea
- Inchiculus convexus
- Arcania cornuta
- Arcania cornuta
- Conlevis sp.
- Radiolapax microphthalmus
- Bythograea austriaca
- Bythograea austriaca sp1and2
- Bythograea austriaca houbzi
- Trichobalanus trichobalanus
- Vulcoxia anfractus
- Erevillea barbata
- Eucrete crenata
- Eucrete crenata
- Eucrete alcocki
- Mathidella rubra
- Mathidella rubra
- Epithia verrucosa
- Epithia smithi
- Phigocarcinus oviformis
- Trabezia punctata
- Trabezia digitalis
- Trabezia tigrina
- Trabezia setigera
- Dacryoplumnum rathbunae
- Epixanthus sp.
- Epixanthus frontalis
- Ozius rugosus
- Ozius anhillipes
- Ozius reticulatus
- Epixanthus tenuidactylus
- Pseudozius caystrus
- Tetralia glaberrima
- Platyanthus orbigny
- Danielum bifidata
- Danielum ybauchac
- Plumnum dasyopus
- Plumnum dasyopus
- Plumnum vesperillo
- Plumnum spinosum
- Plumnum orbigny
- Plumnum orbigny
- Galene bispinosa
- Hypothalassia armata
- Bythograea laubieri
- Bythograea laubieri
- Neogonoplax renoculus
- Carcinoplax pumilata
- Carcinoplax pumilata
- Carcinoplax longimanus
- Homalaspis plana
- Danielum danieli
- Scalopidia siphosipes
- Omaroxanthus balboa
- Scudorhombia dentata
- Scudorhombia dentata
- Scudorhombia quadridentata
- Lophoxanthus lamellipes
- Thalassoplax angusta
- Thalassoplax angusta
- Panoplax depressa
- Micropanope sculpipe
- Panopeus herbstii
- Yalacoplax californiensis
- Eurytium limosum
- Hexapanopeus angustifrons
- Cyrtoplax smithi
- Acantliobolus bermudensis
- Rhithropanopeus harrisi
- Neopanope packardii
- Dyspanopeus sayi
- Lybia tessellata
- Alactaea lithostrotia
- Edwardium lobipes
- Carpoporius papulosus
- Paraxanthus barbigeri
- Catalpoxius foronensis
- Xanthodius siemmerghii land2
- Xanthodius cooksoni
- Xantho pilipes
- Williamsonia denticulatus
- Palapedia cf. nitida
- Xantho areolatus
- Cycloides obscurus
- Xanthia canaliculatus
- Atergatis integerrimus
- Atergatis integerrimus
- Atergatis thorius
- Panopeus herbstii
- Novactaea bella
- Actaeodes tomentosus
- Actaeodes tomentosus
- Platactaea dovii
- Paractaea sp.

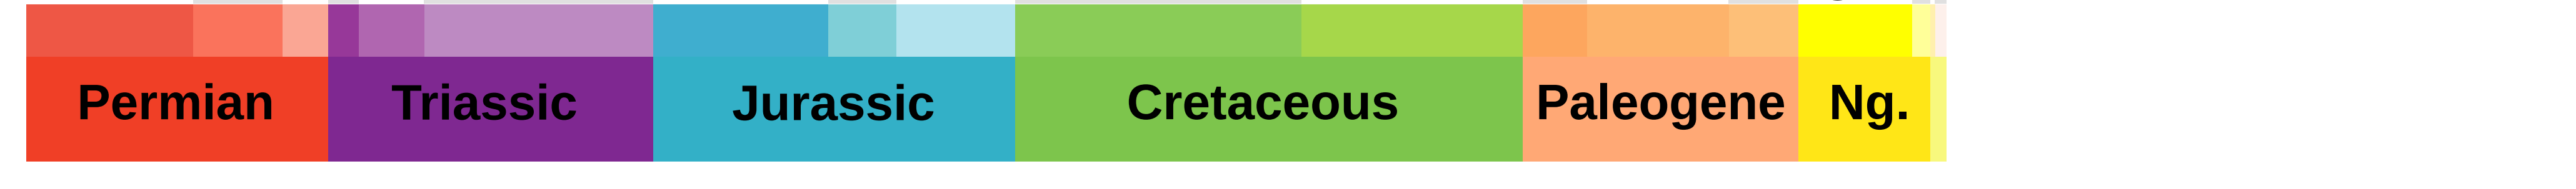

**A**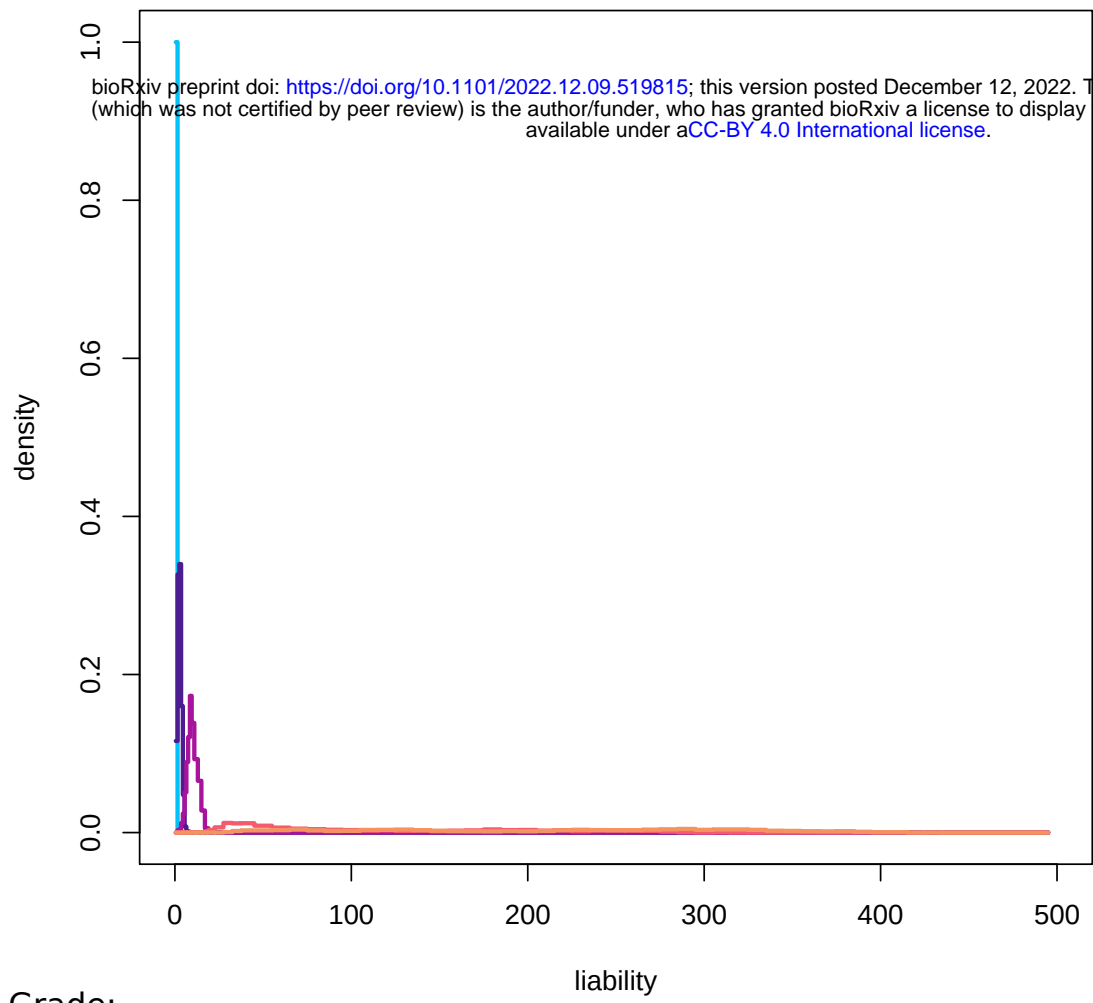

Grade:

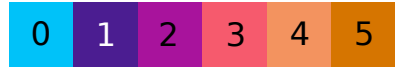**C**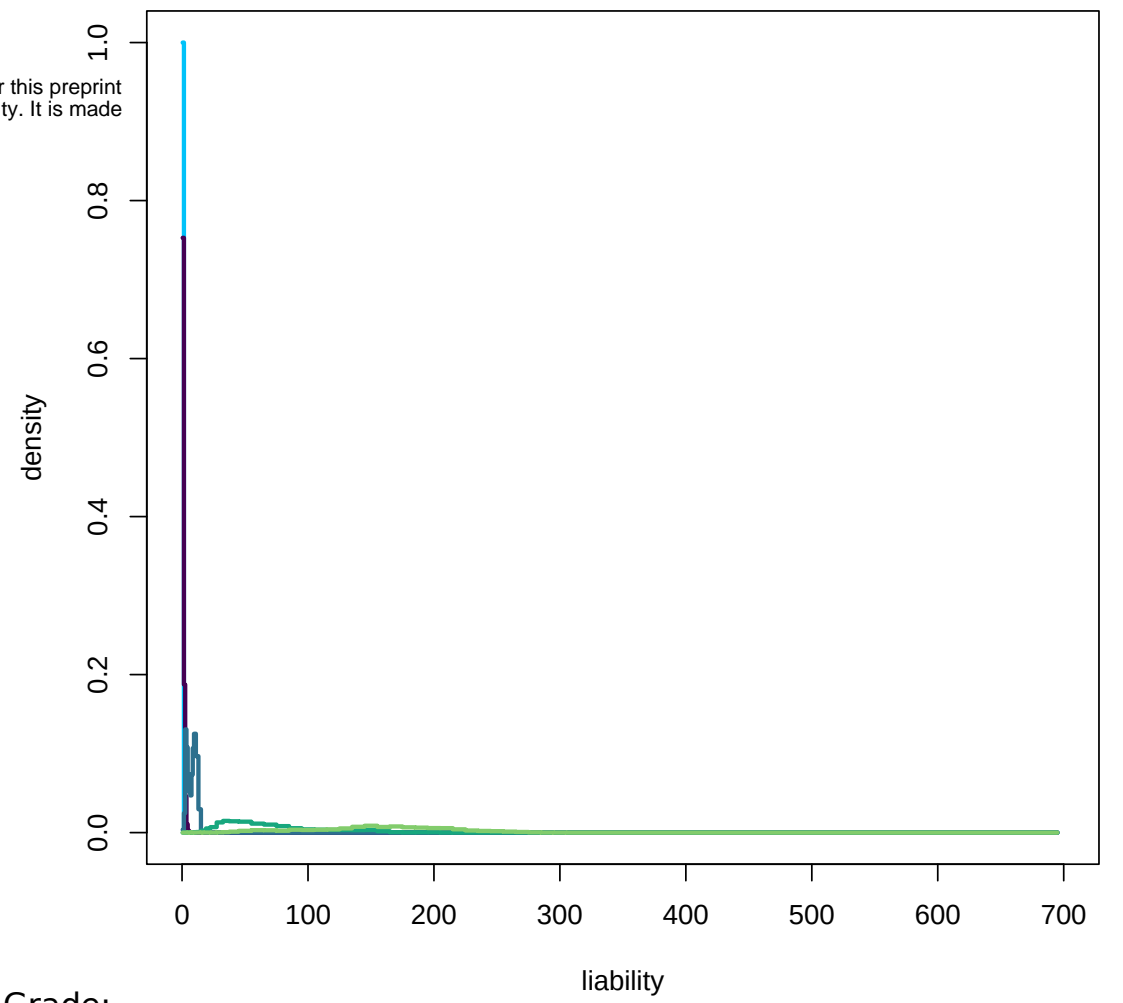

Grade:

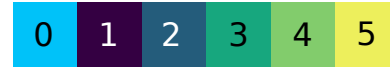**B**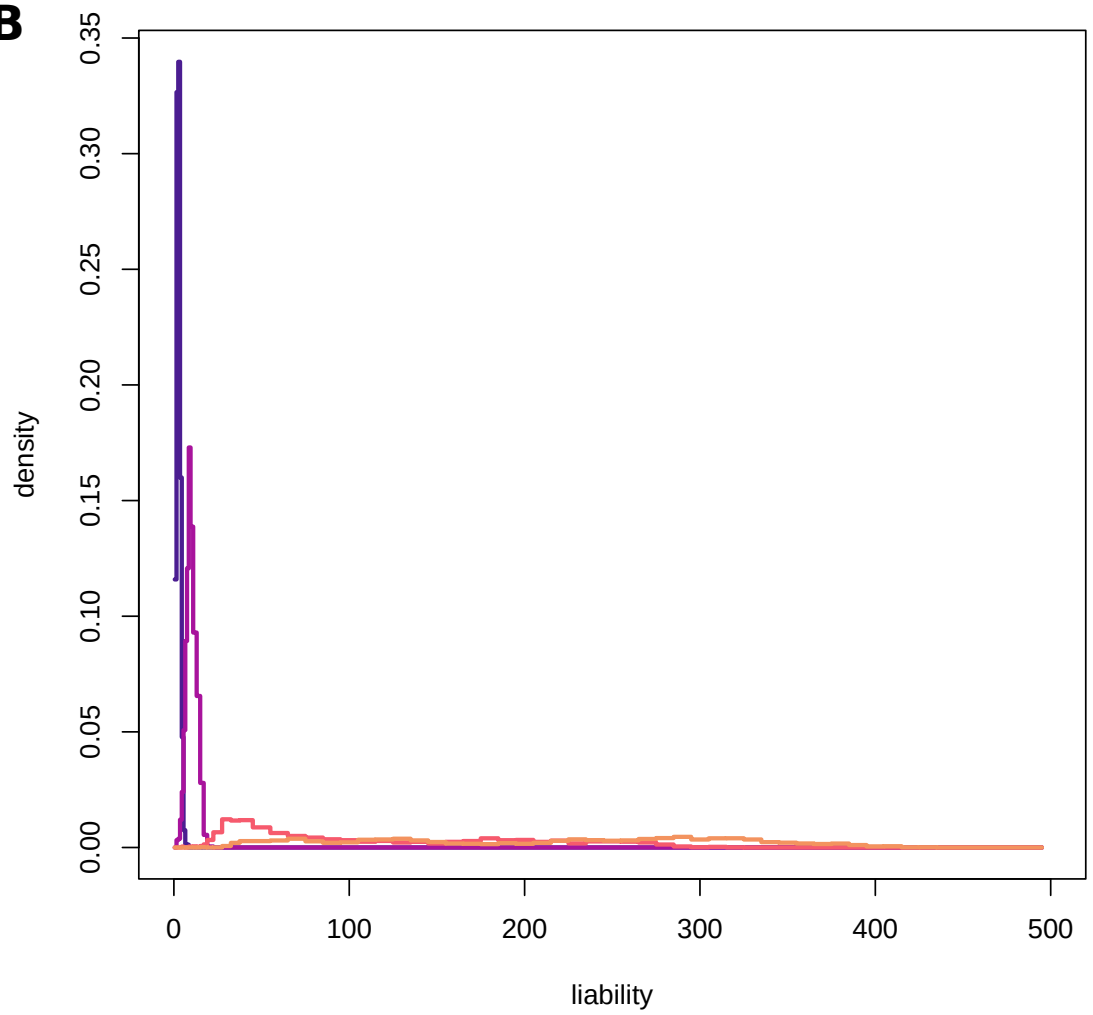**D**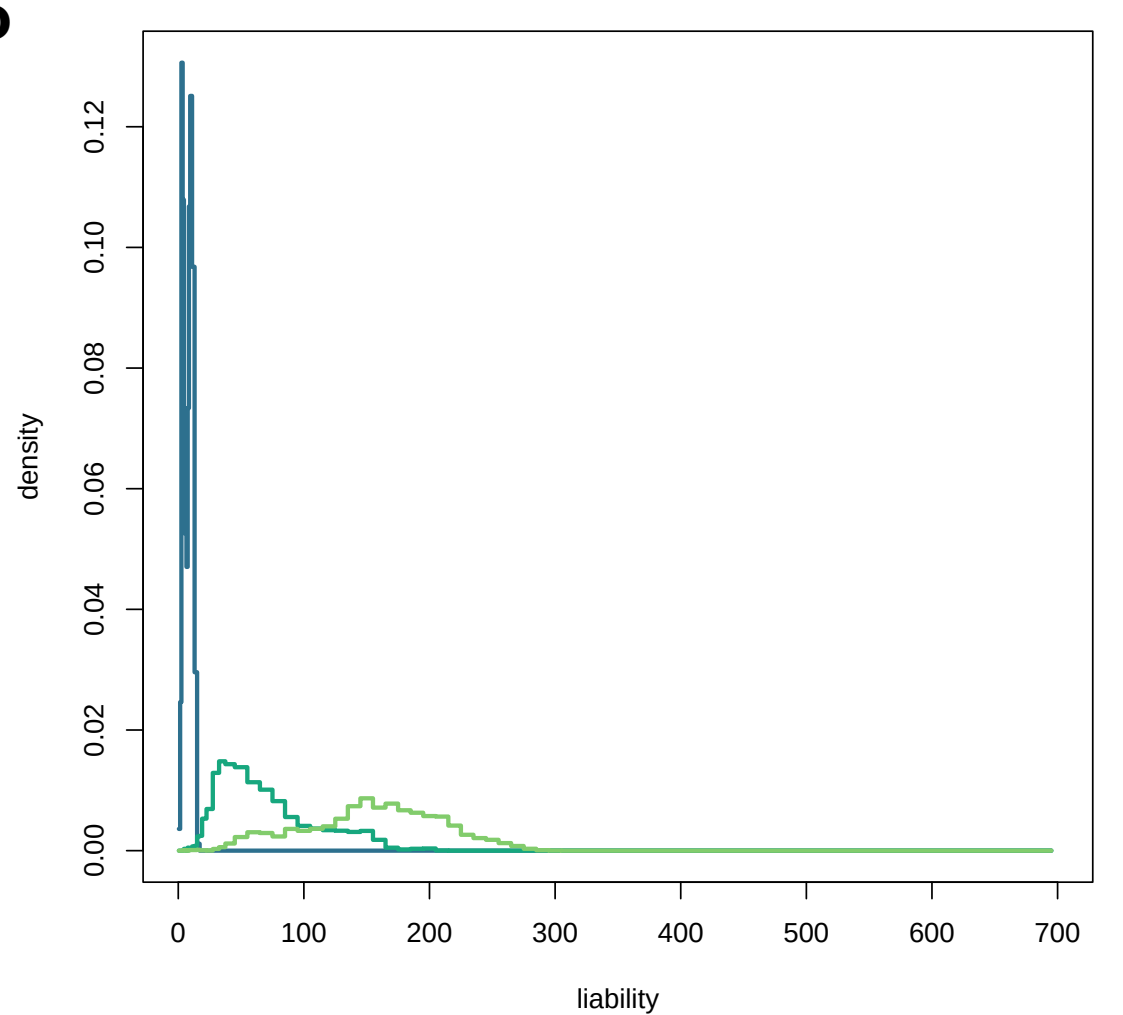

250 201 145 100 56 0

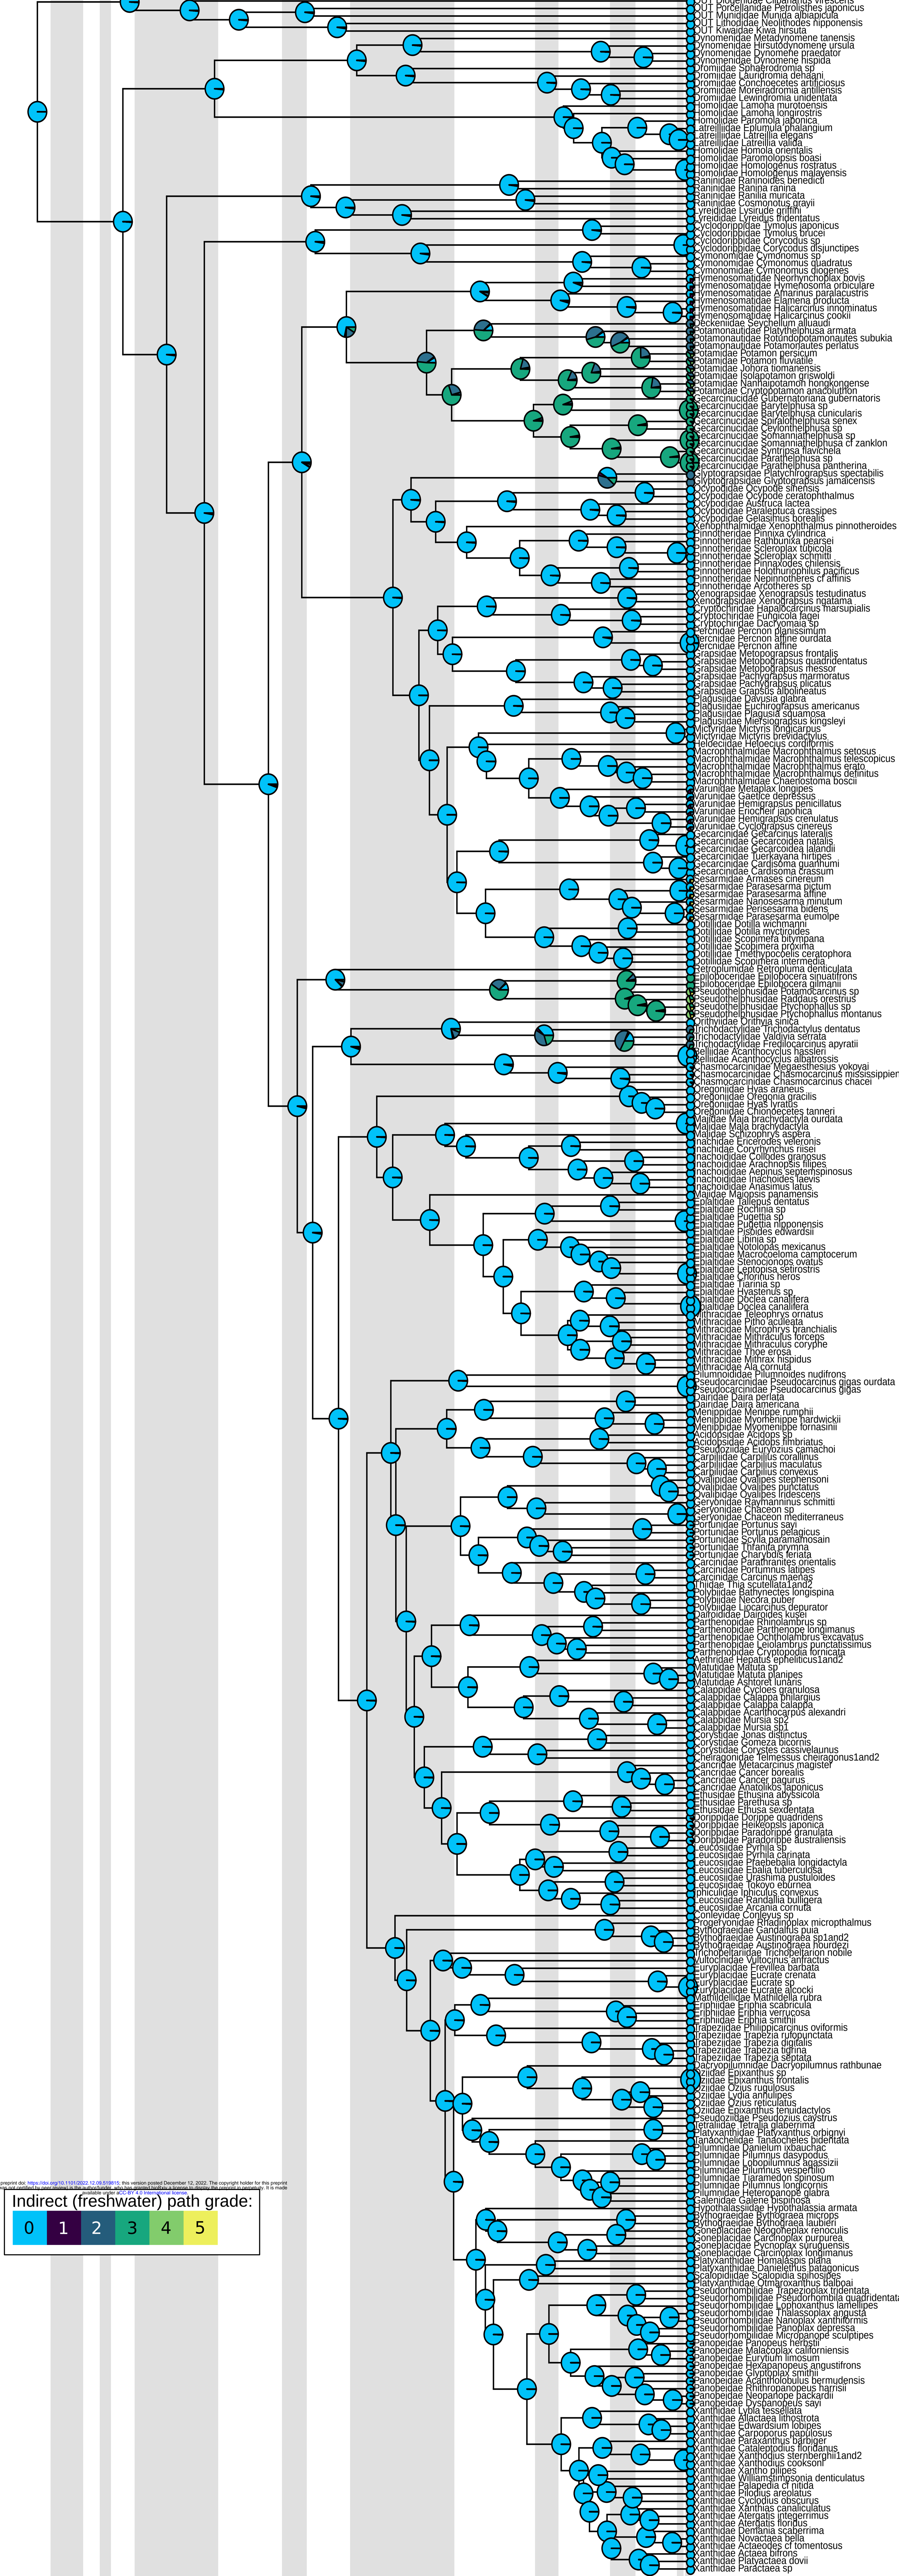

bioRxiv preprint doi: <https://doi.org/10.1101/2022.12.09.519815>; this version posted December 12, 2022. The copyright holder for this preprint (which was not certified by peer review) is the author/funder, who has granted bioRxiv a license to display the preprint in perpetuity. It is made available under aCC-BY 4.0 International license.

Indirect (freshwater) path grade:  
 0 1 2 3 4 5

Permian Triassic Jurassic Cretaceous Paleogene Ng.

**A**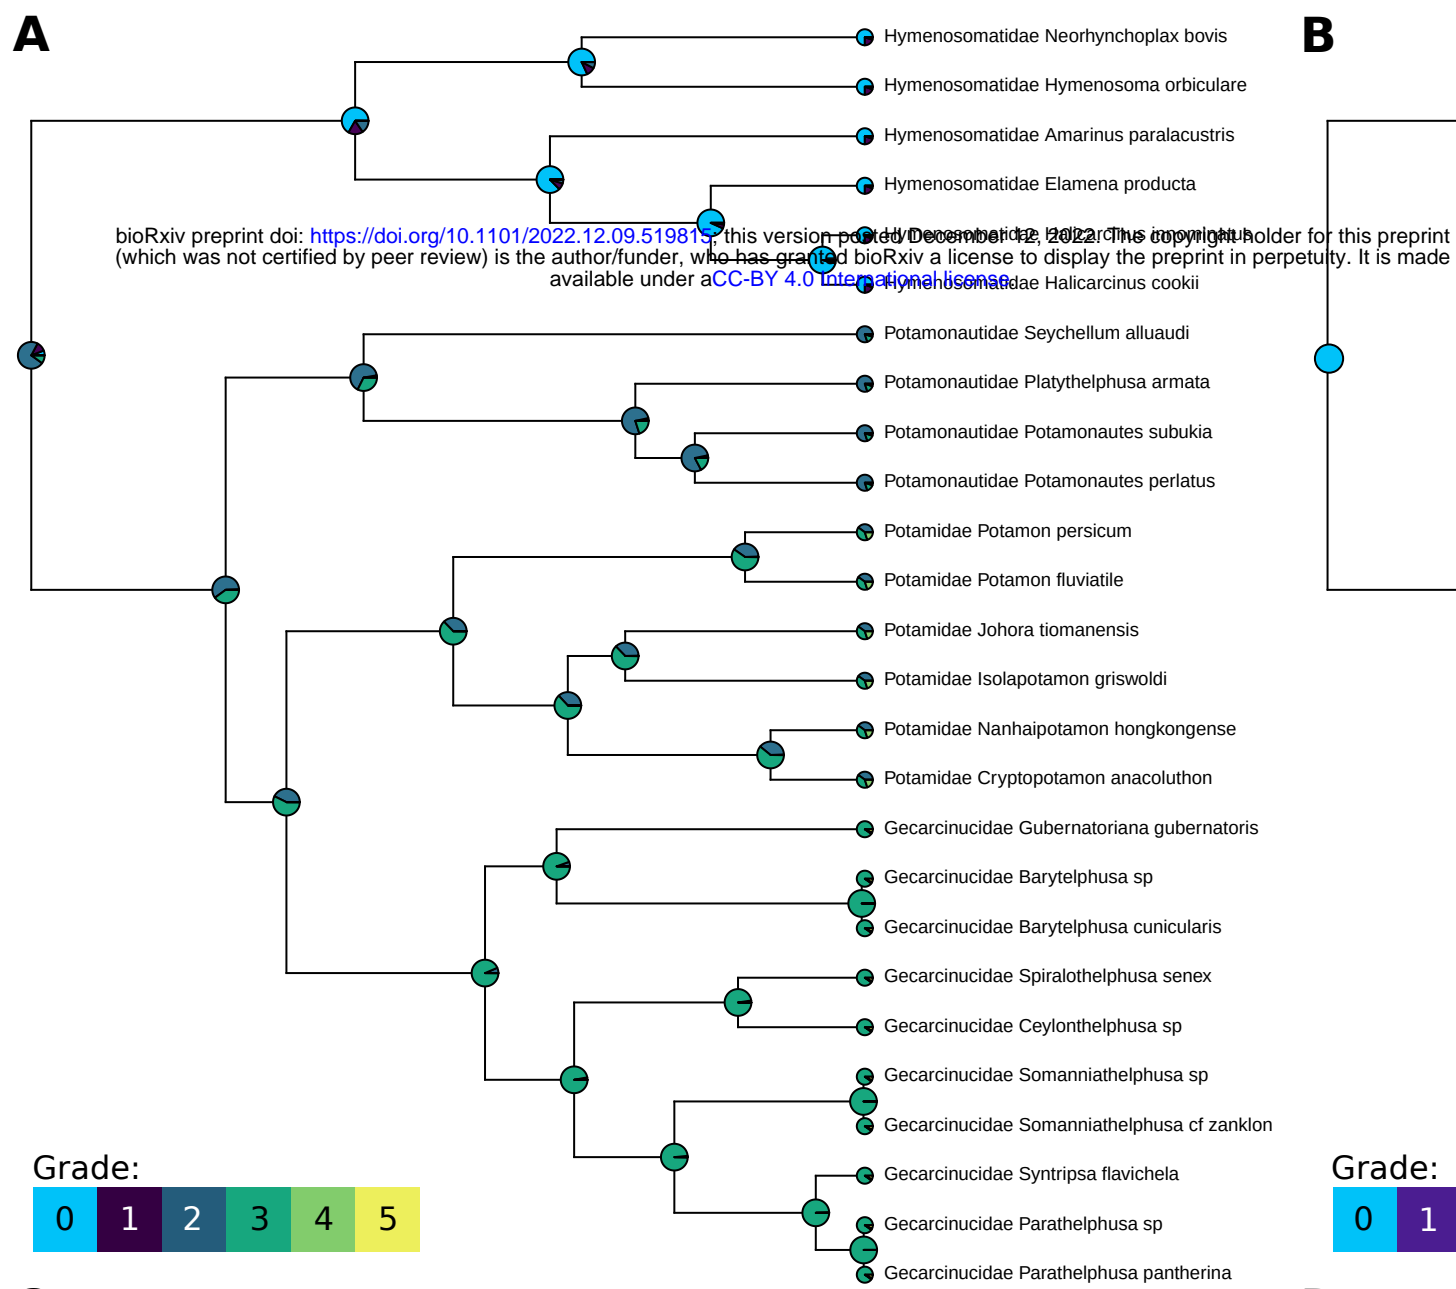**B**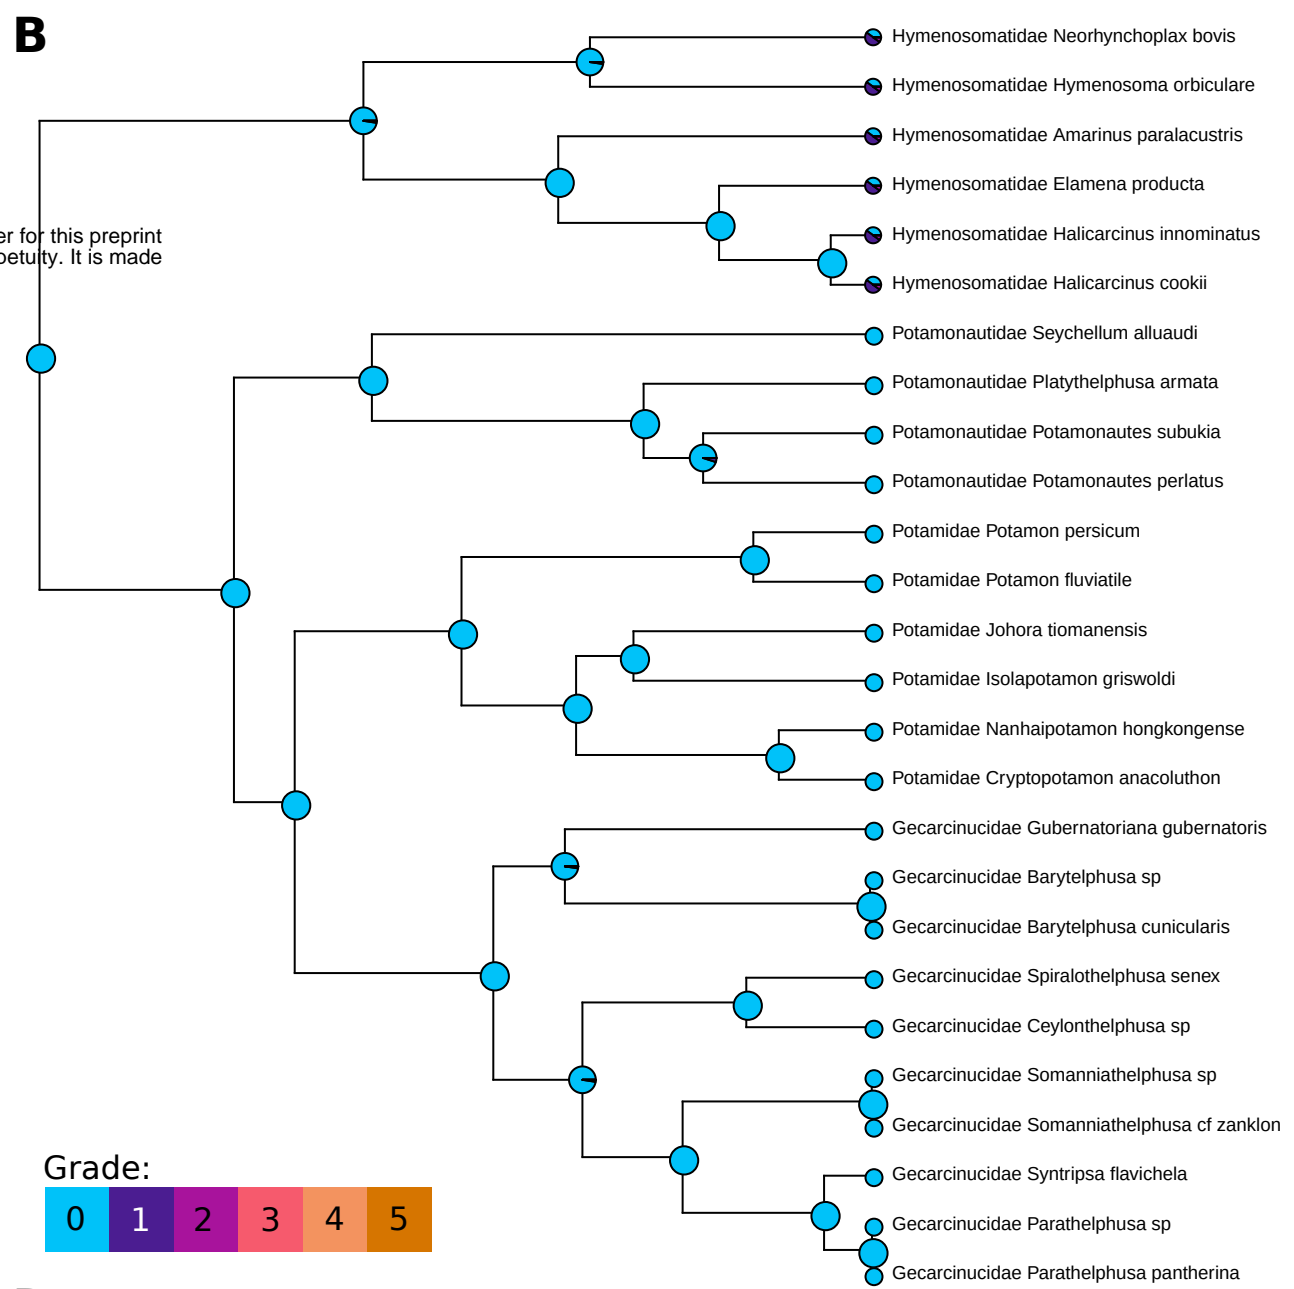**C**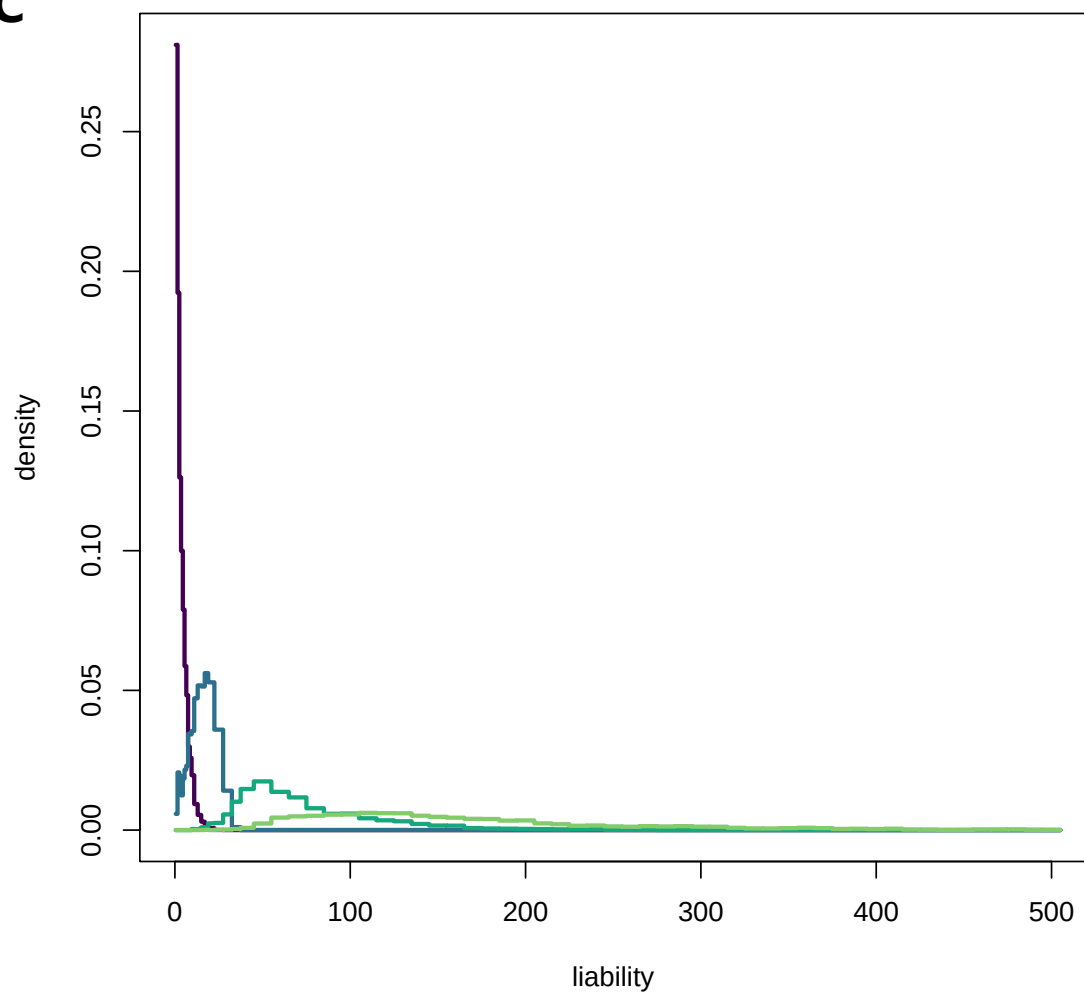**D**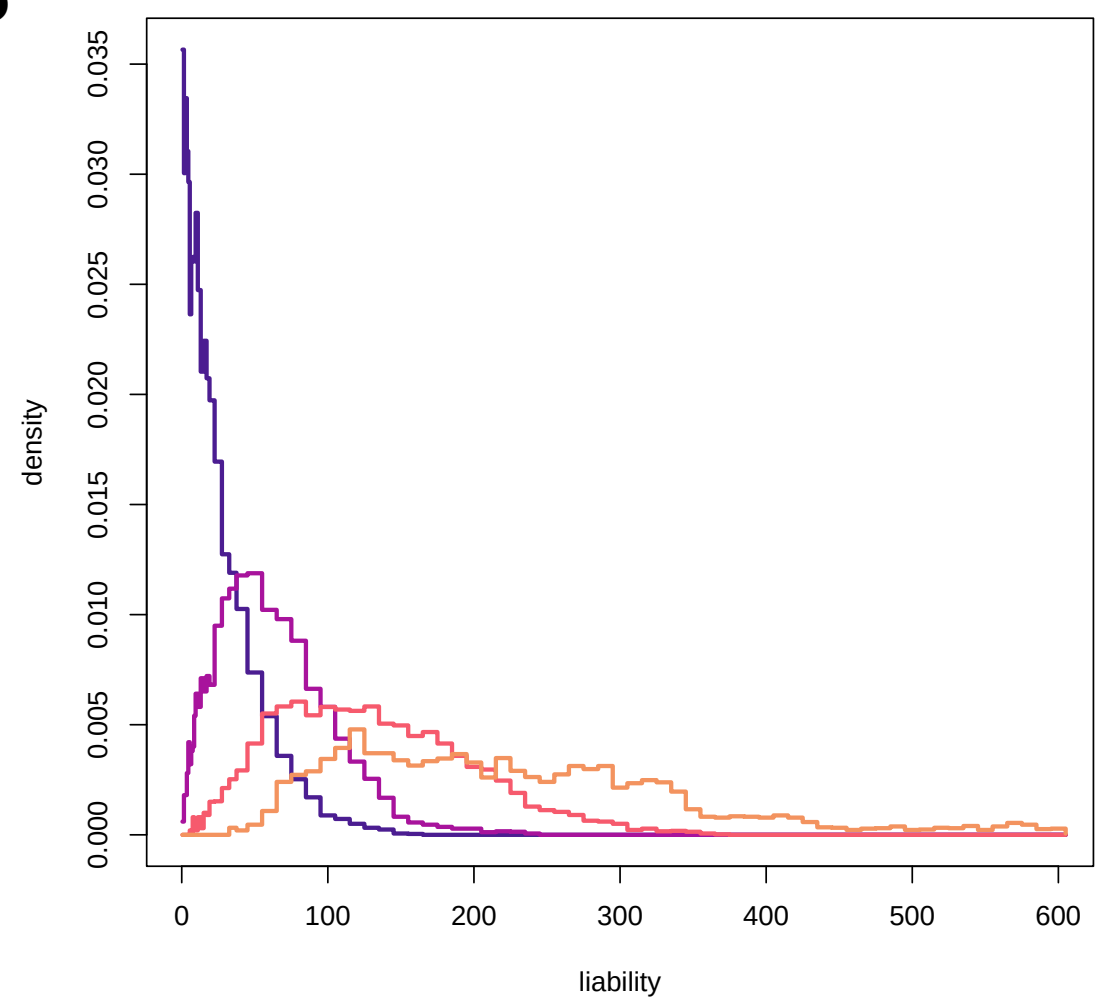

**A**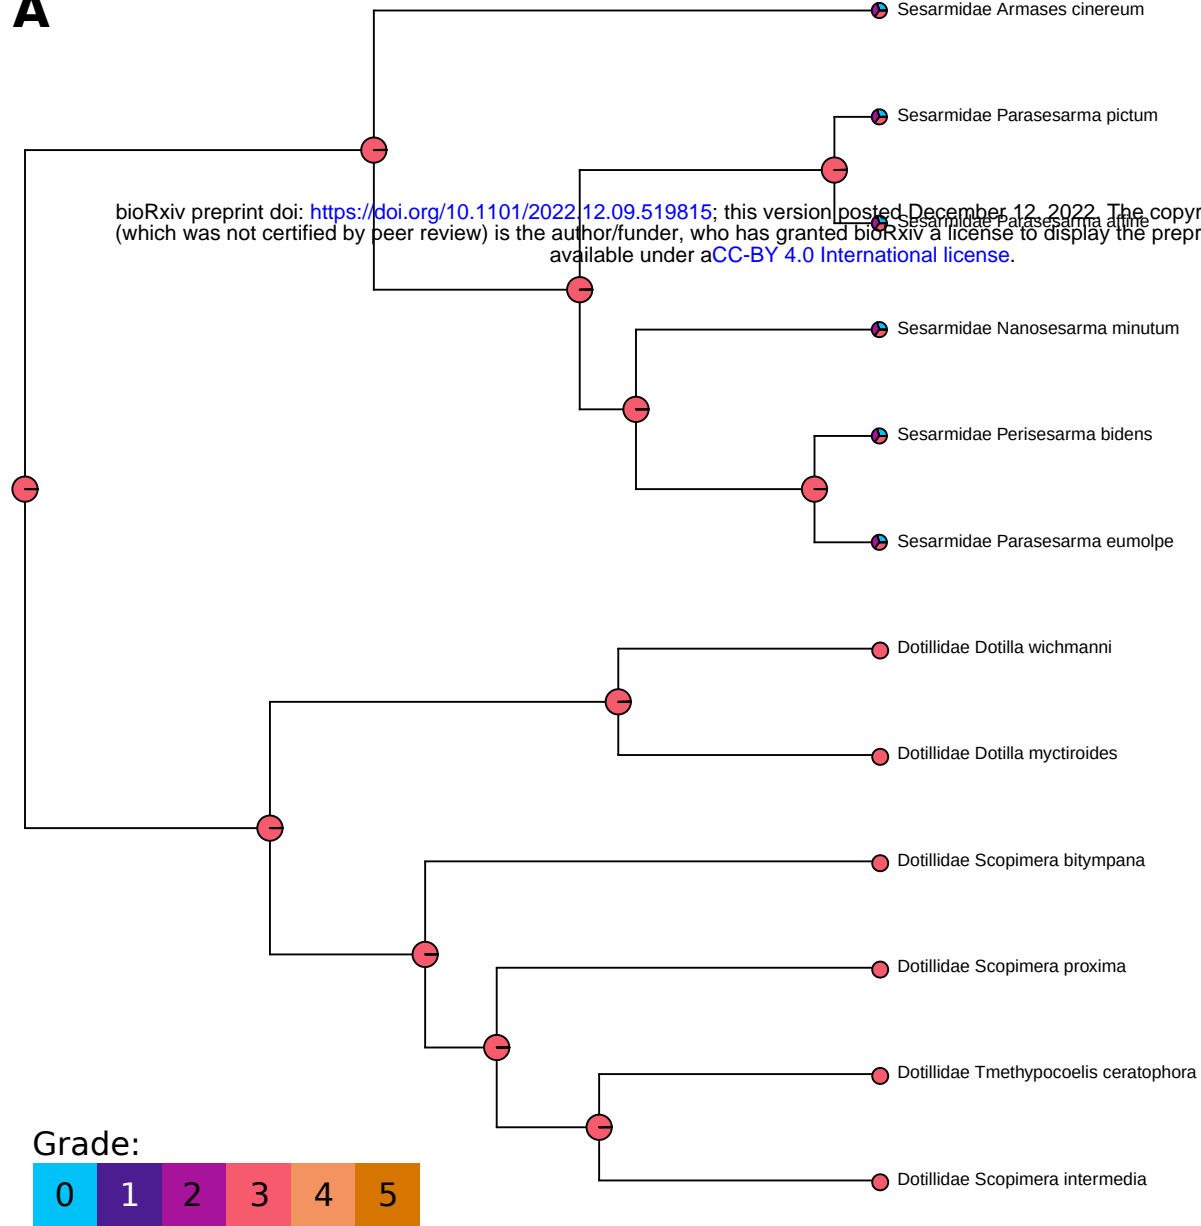**B**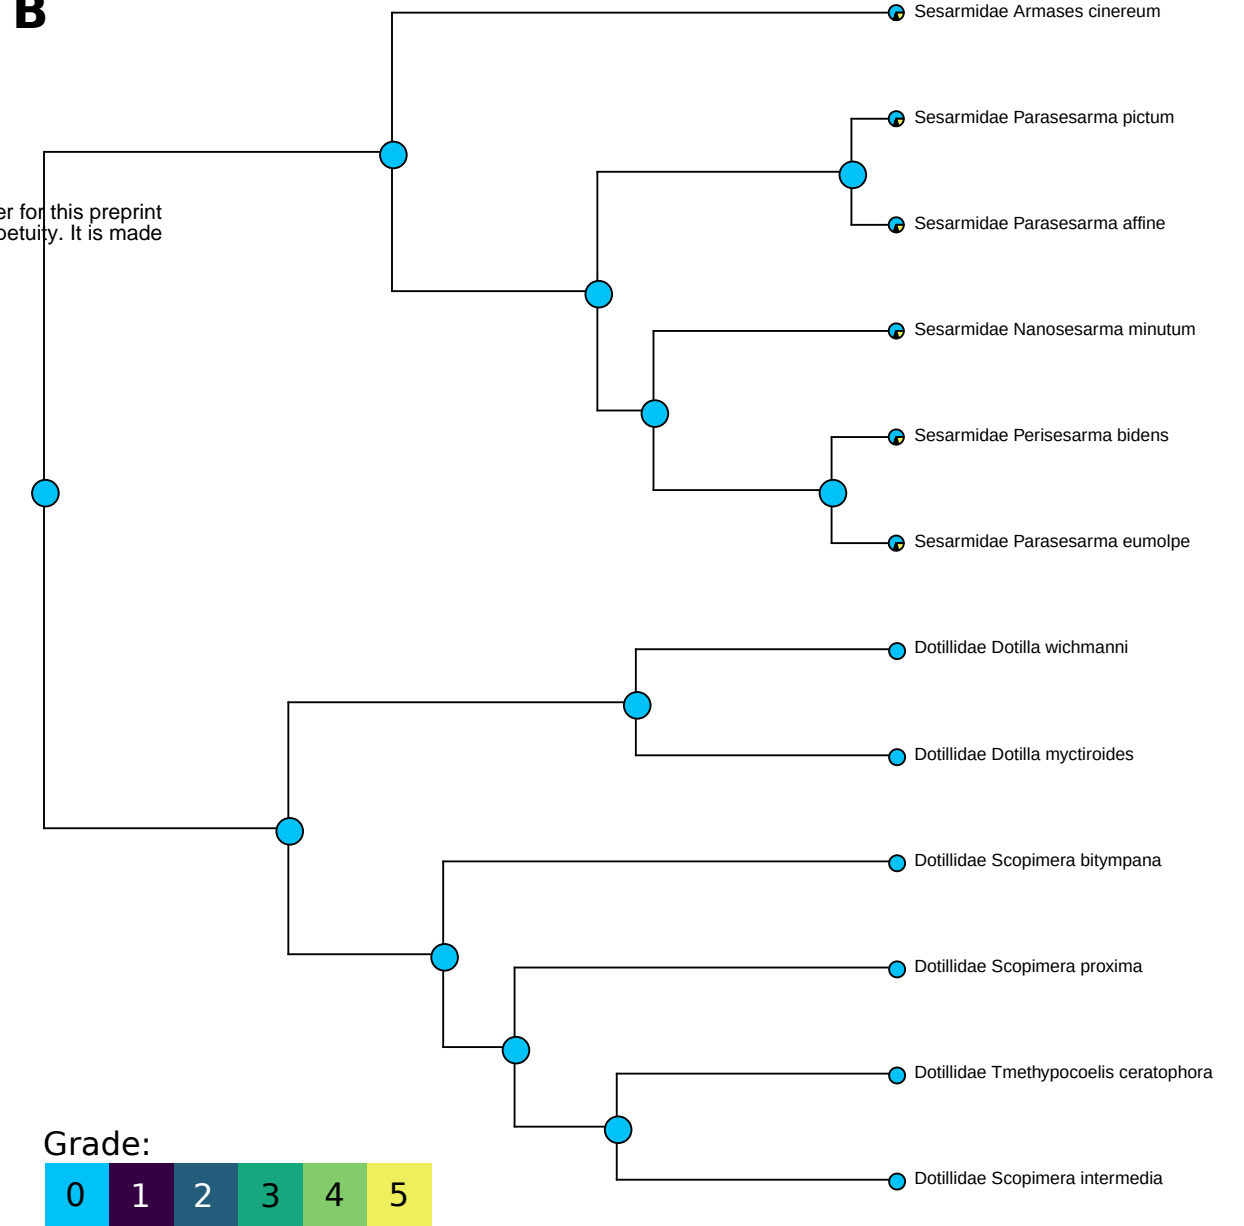**C**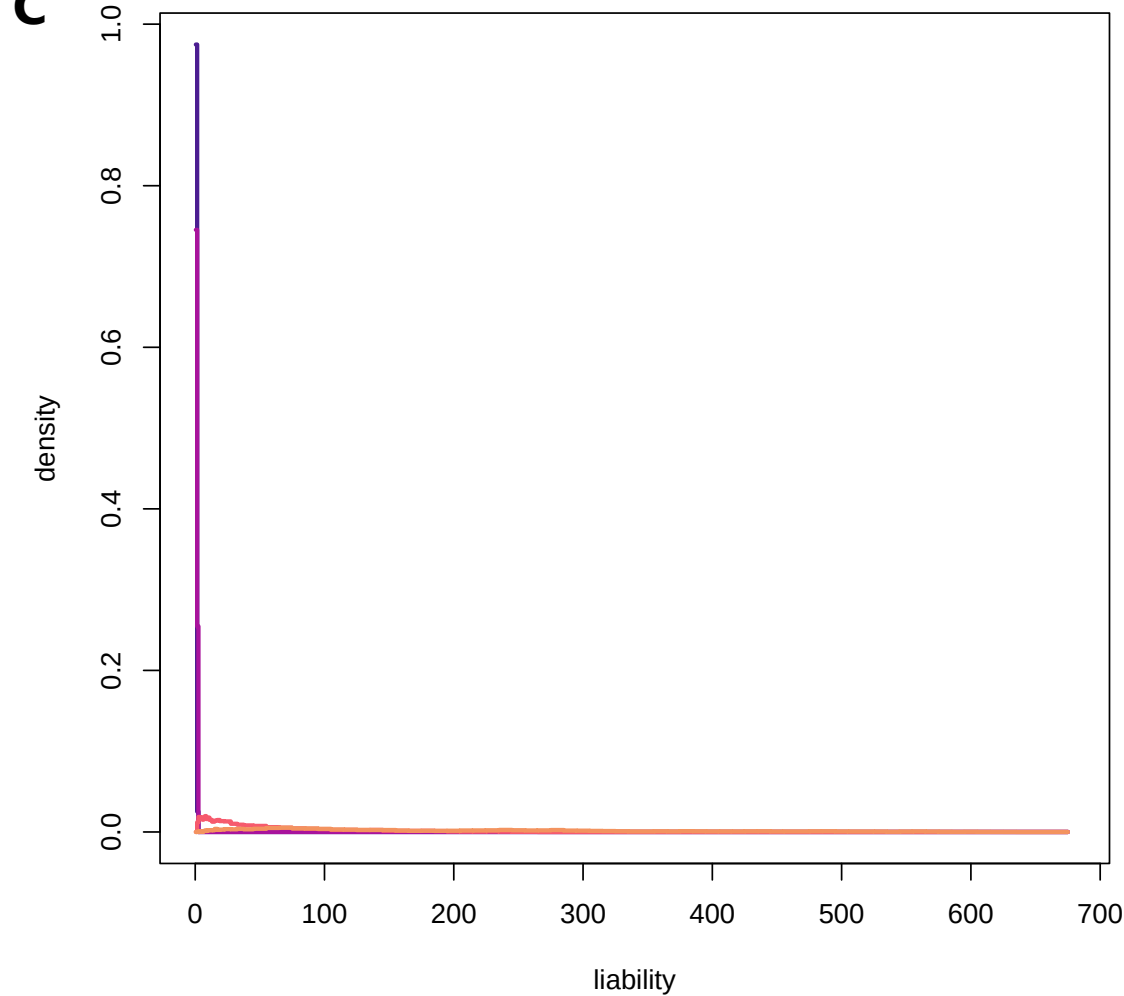**D**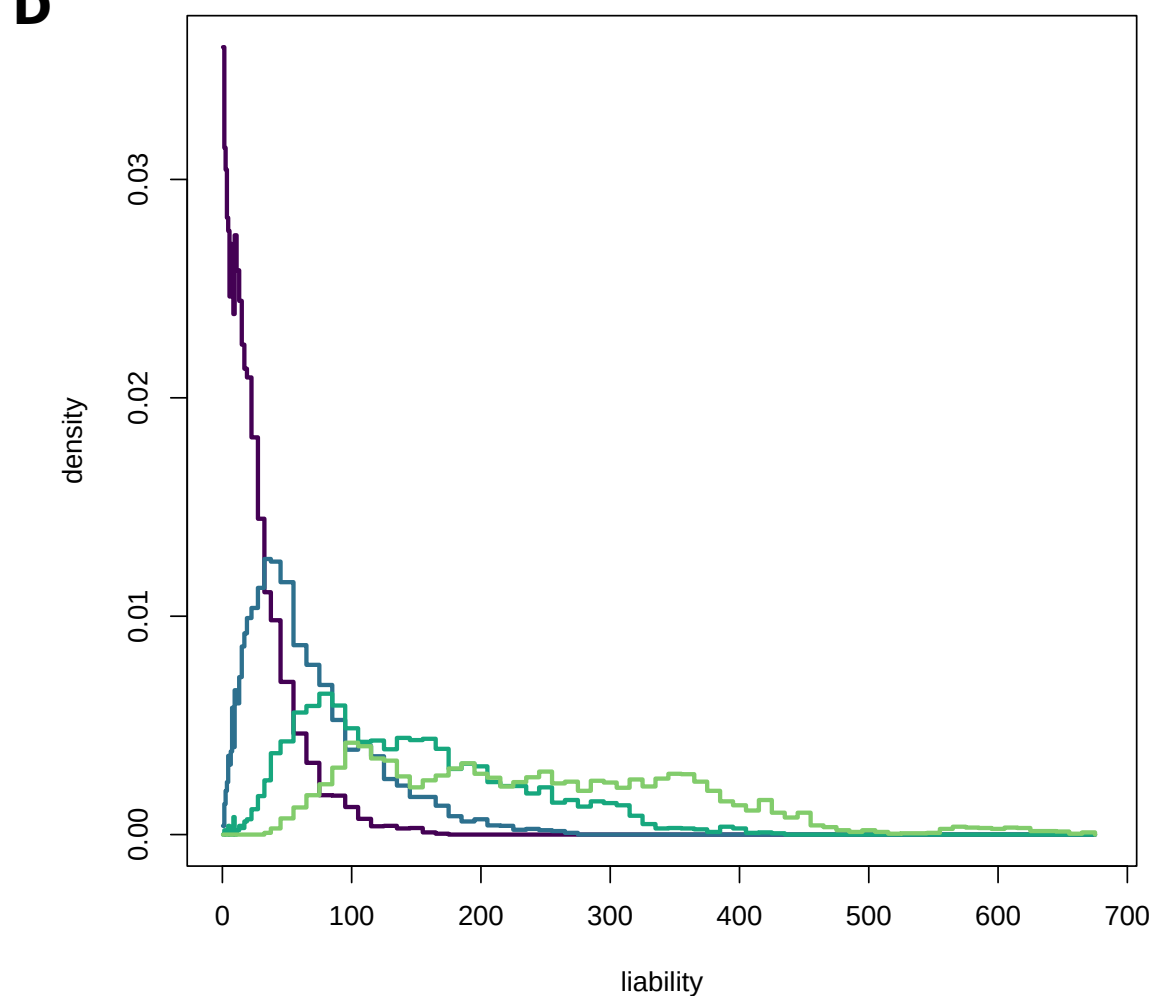

Source: https://www.biorxiv.org/content/10.1101/2022.12.09.519815v1.full.pdf
